# Supplementary material for: Total synthesis of protosappanin A and its derivatives via palladium catalyzed ortho C–H activation/C–C cyclization under microwave irradiation
Source: Royal Society of Chemistry journal article supplement (doi:10.1039/c6cc01149g), 2016-01-01
Supplement: c6cc01149g2.pdf [file c6cc01149g2.pdf]

## $^1\text{H}$ and $^{13}\text{C}$ NMR spectra for compounds

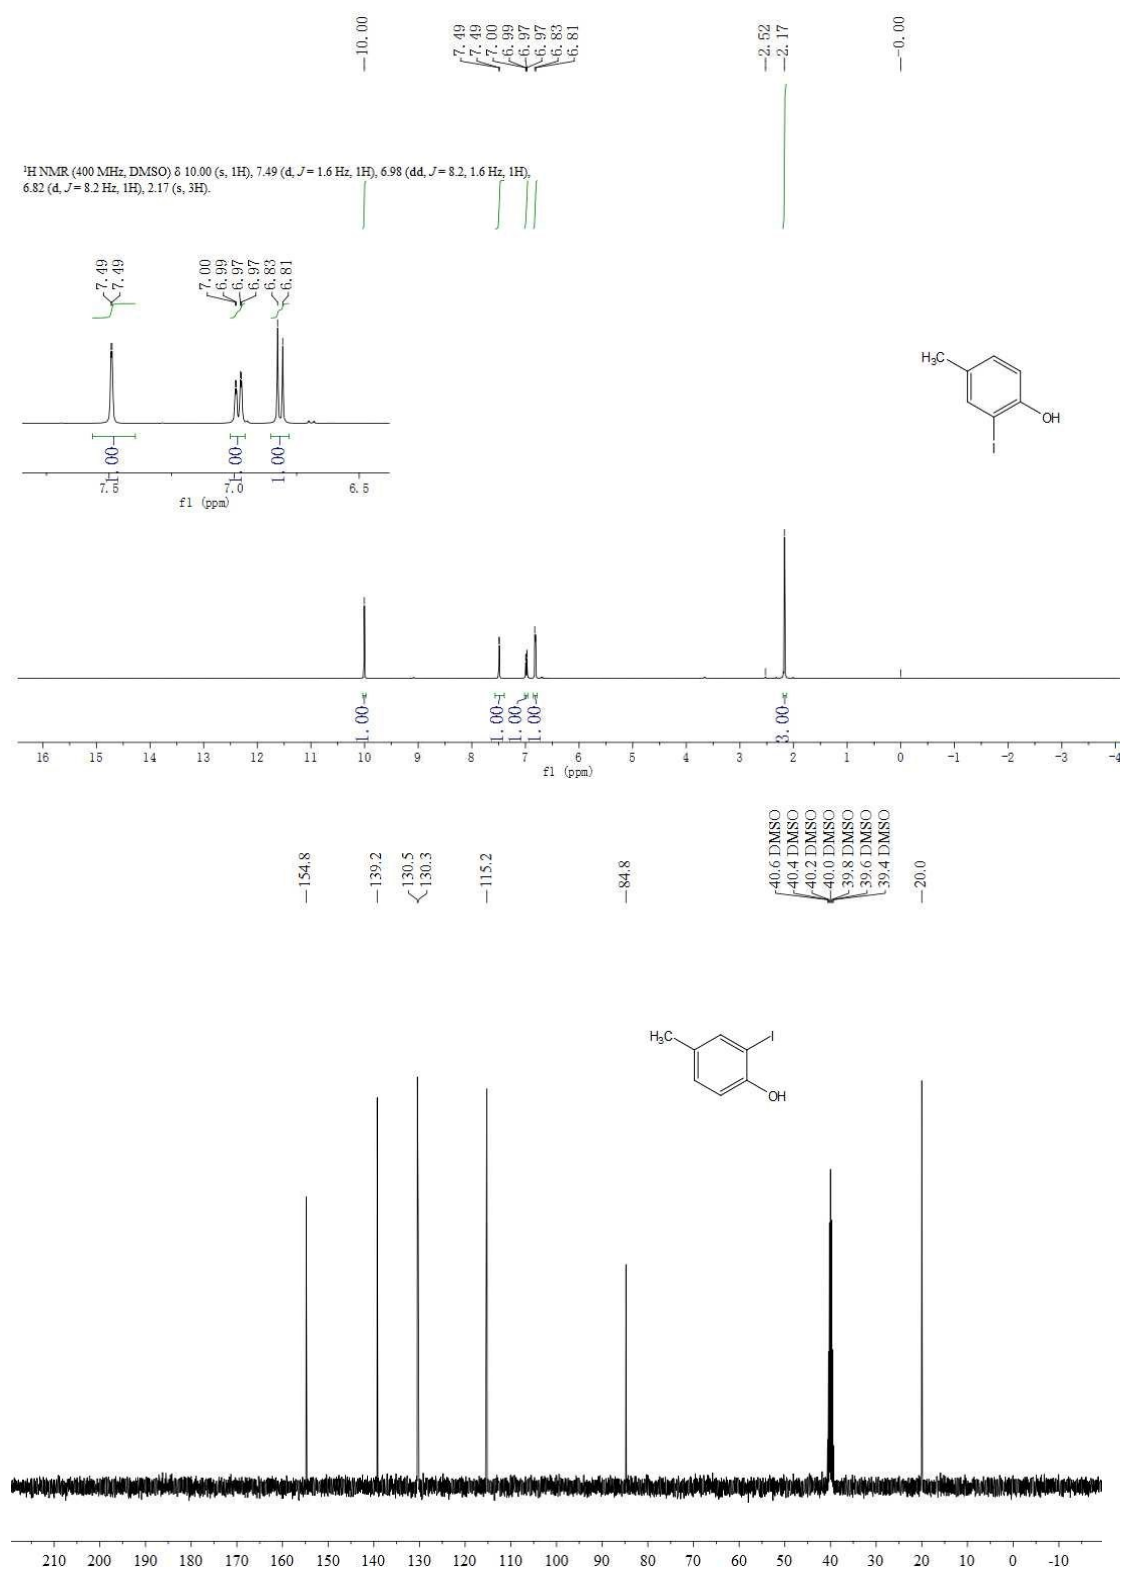

Fig. S1 NMR spectra of **1b**

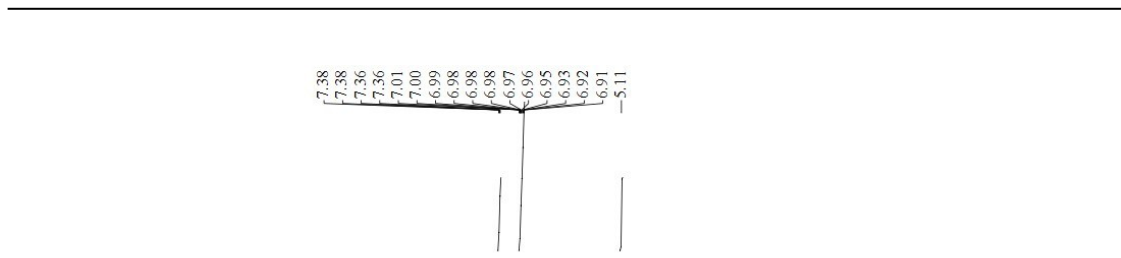

$^1\text{H NMR}$  (400 MHz, Chloroform- $d_3$ )  $\delta$  7.37 (dd,  $J = 7.6, 2.8$  Hz, 1H), 7.01 – 6.91 (m, 2H), 5.11 (s, 1H).

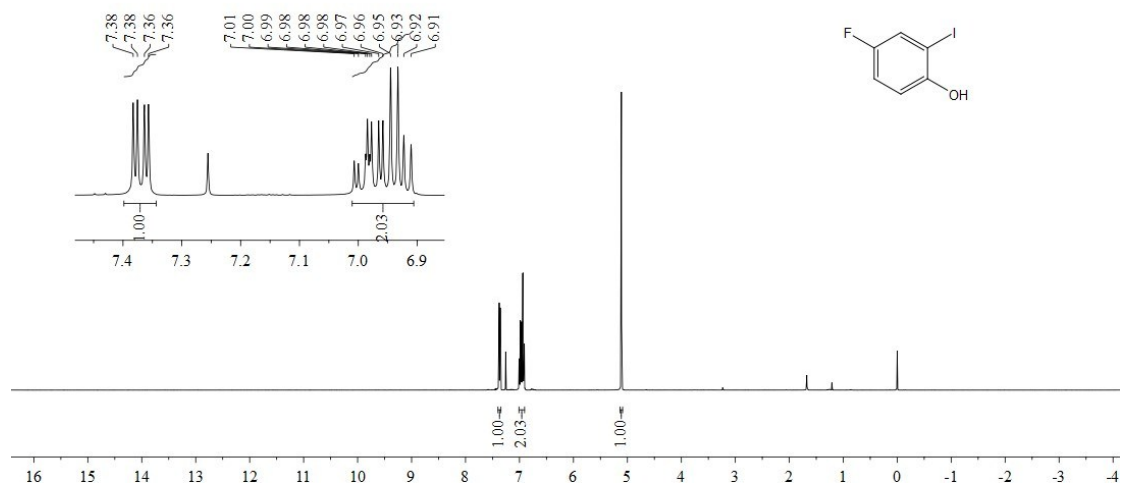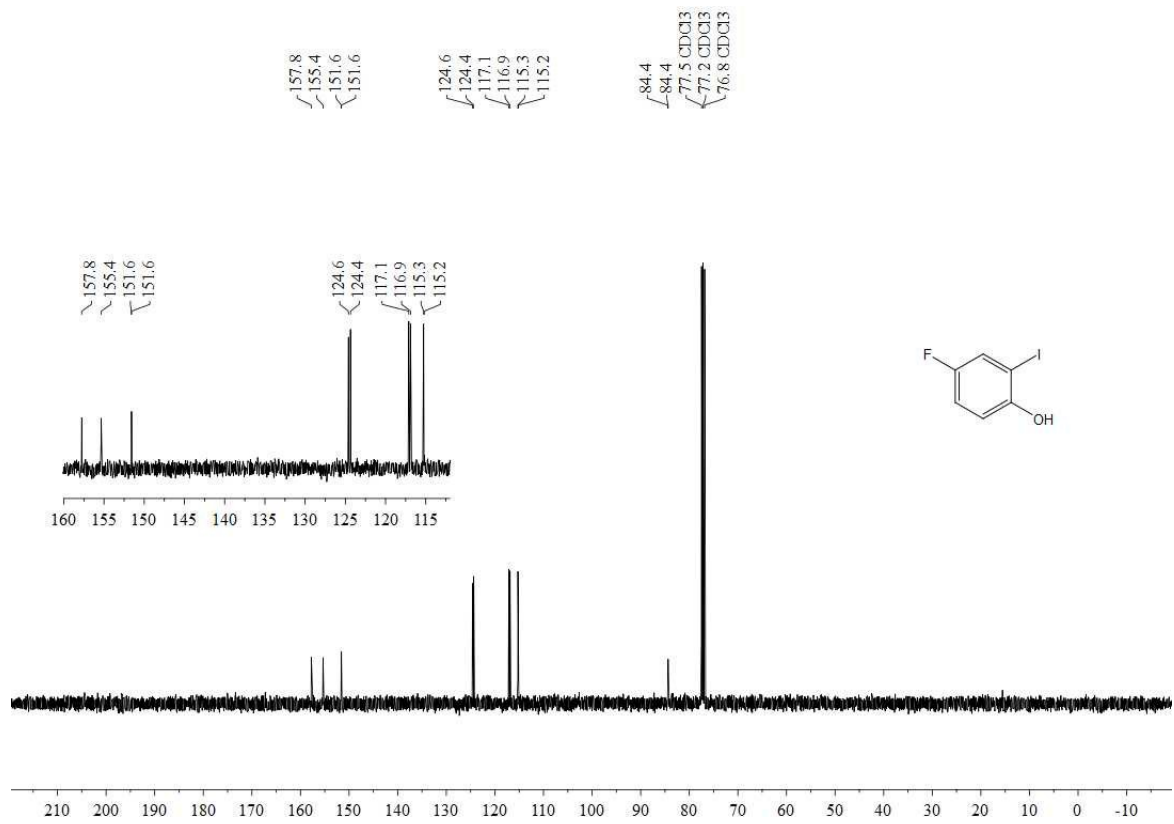

Fig. S2 NMR spectra of **1c**

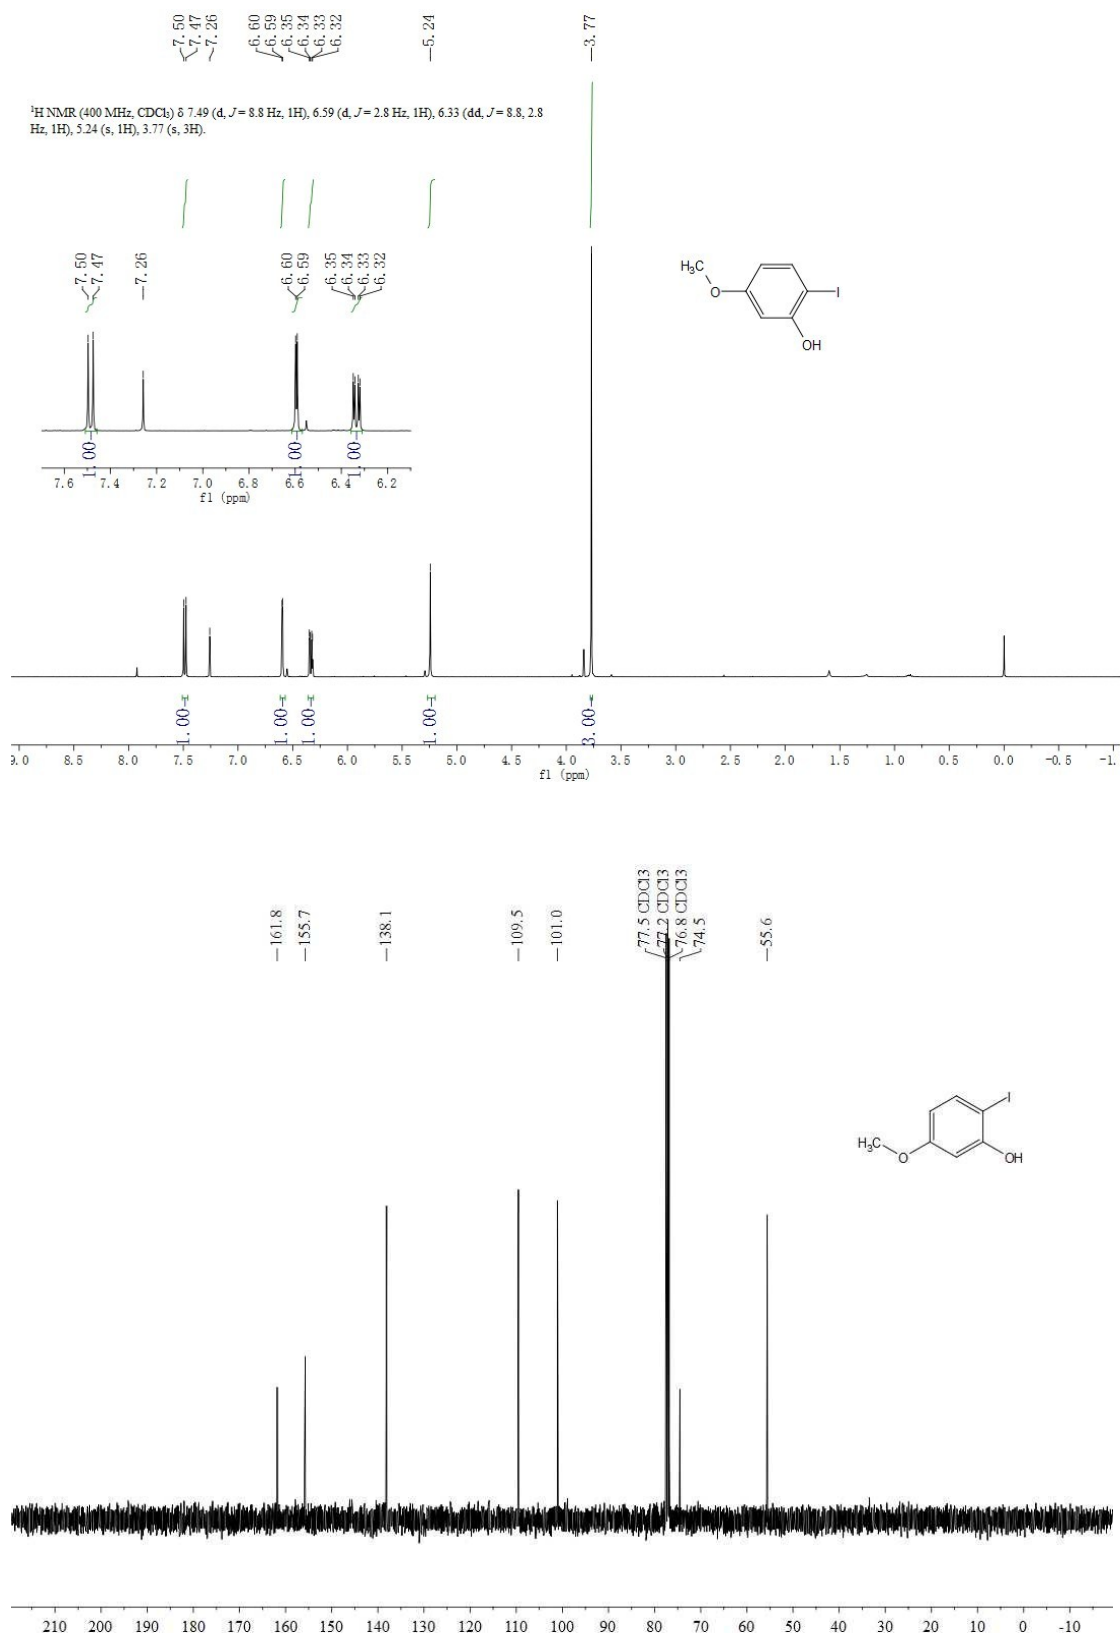

Fig. S3 NMR spectra of **1d**

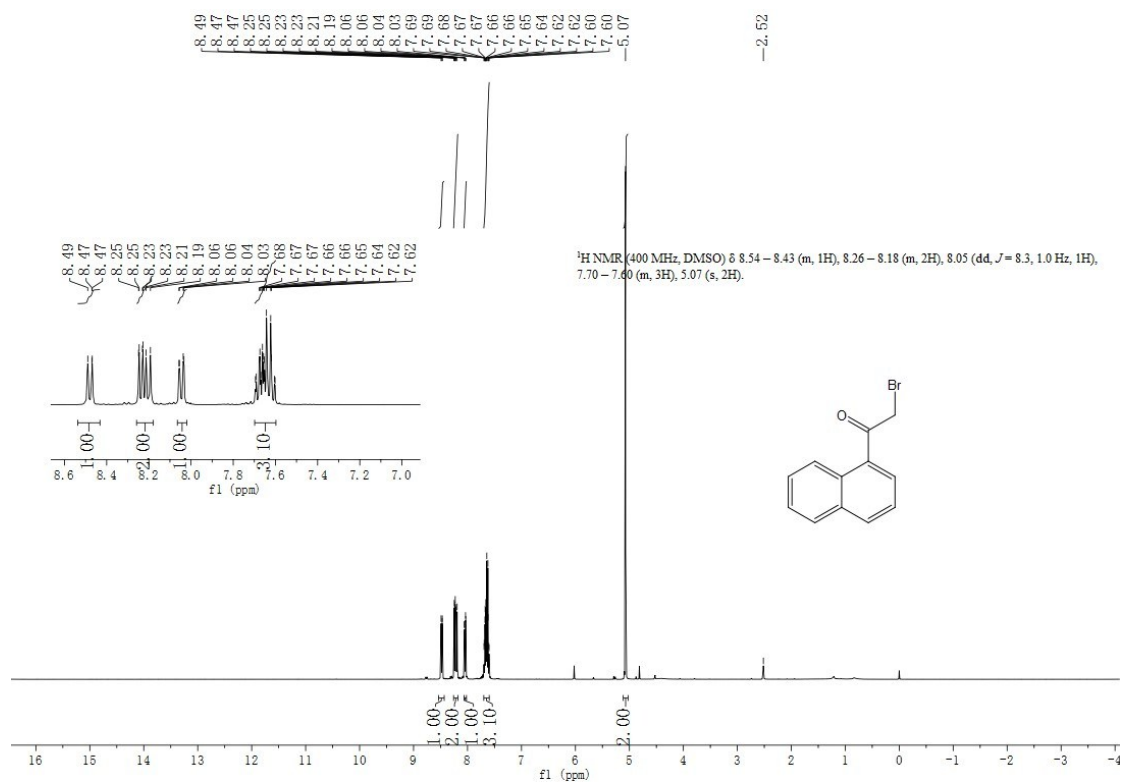

Fig. S4 NMR spectra of **2b**

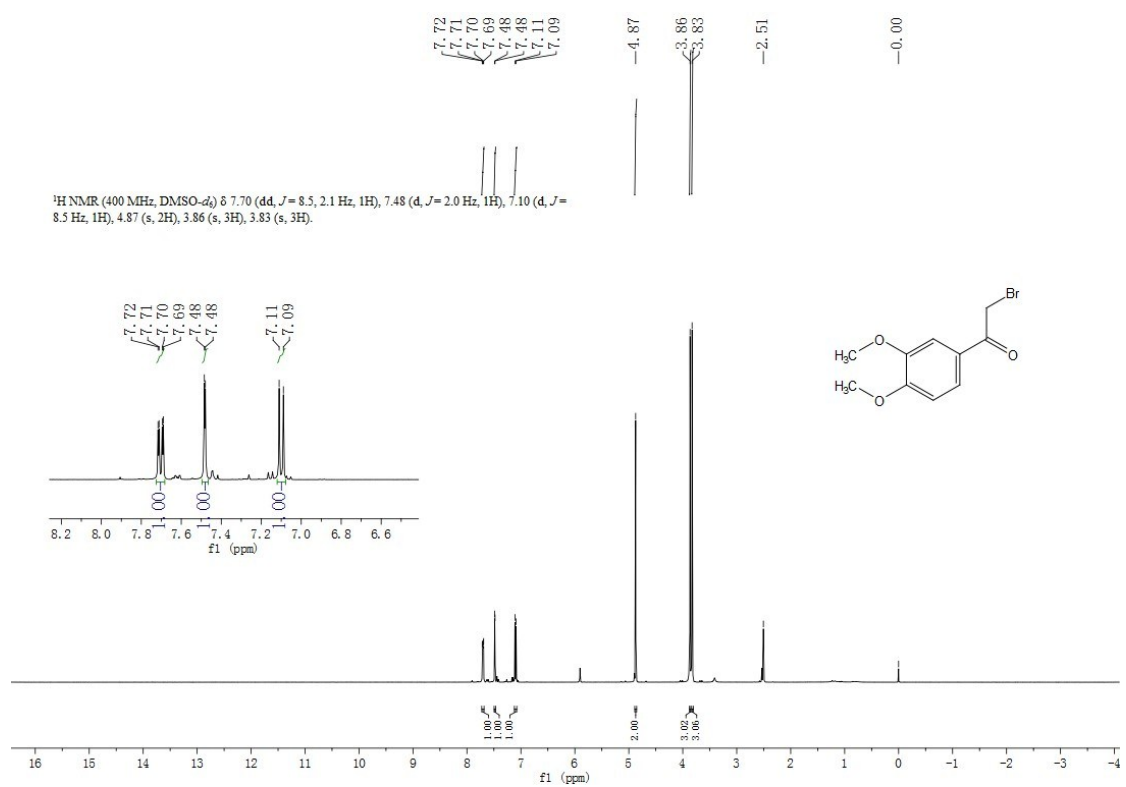

Fig. S5 NMR spectra of **2c**

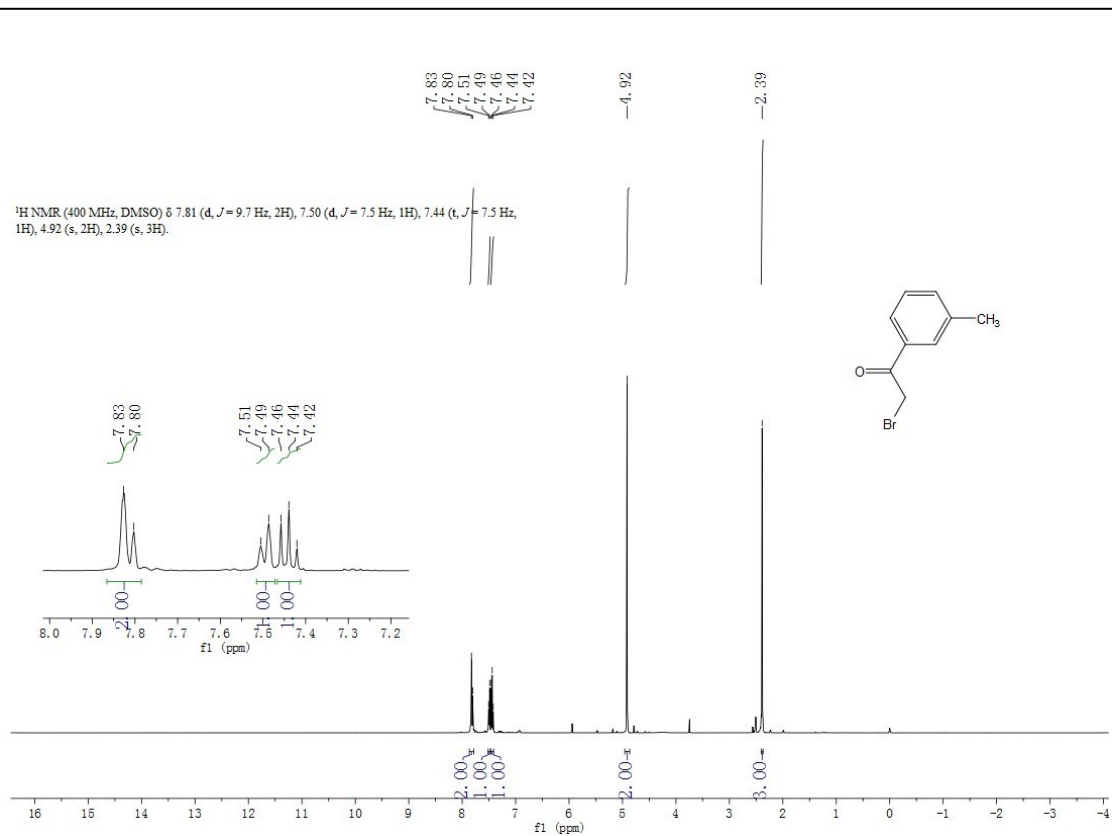

Fig. S6 NMR spectra of **2d**

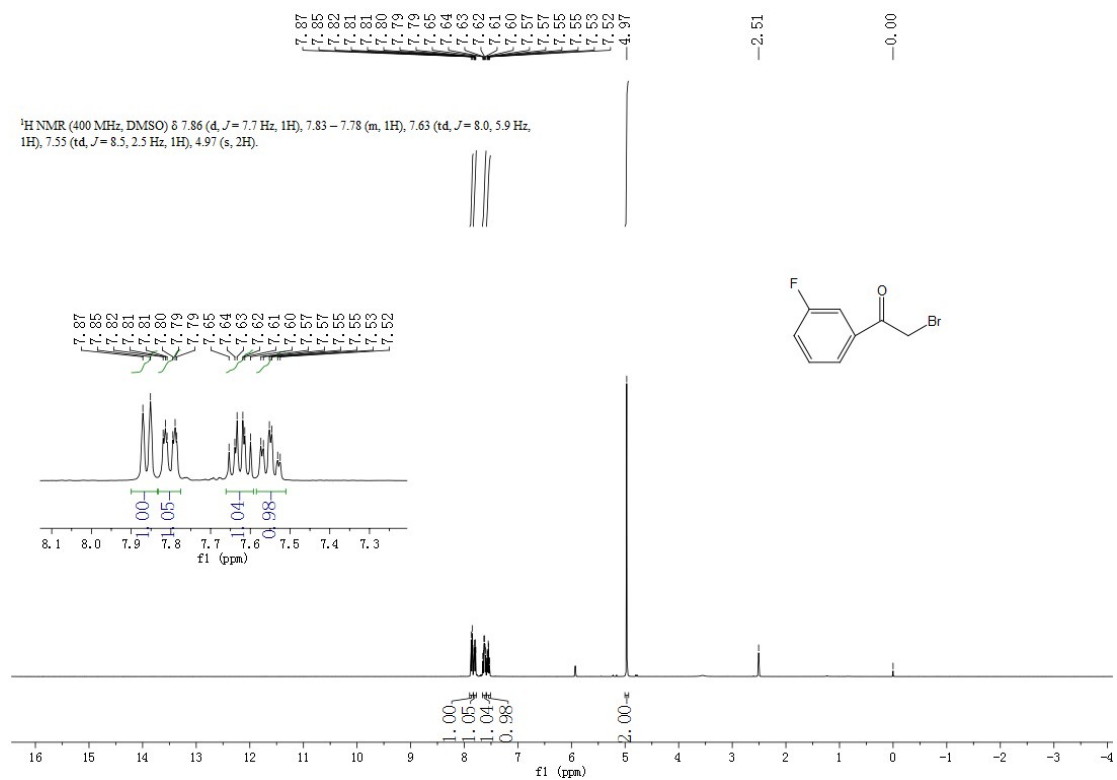

Fig. S7 NMR spectra of **2e**

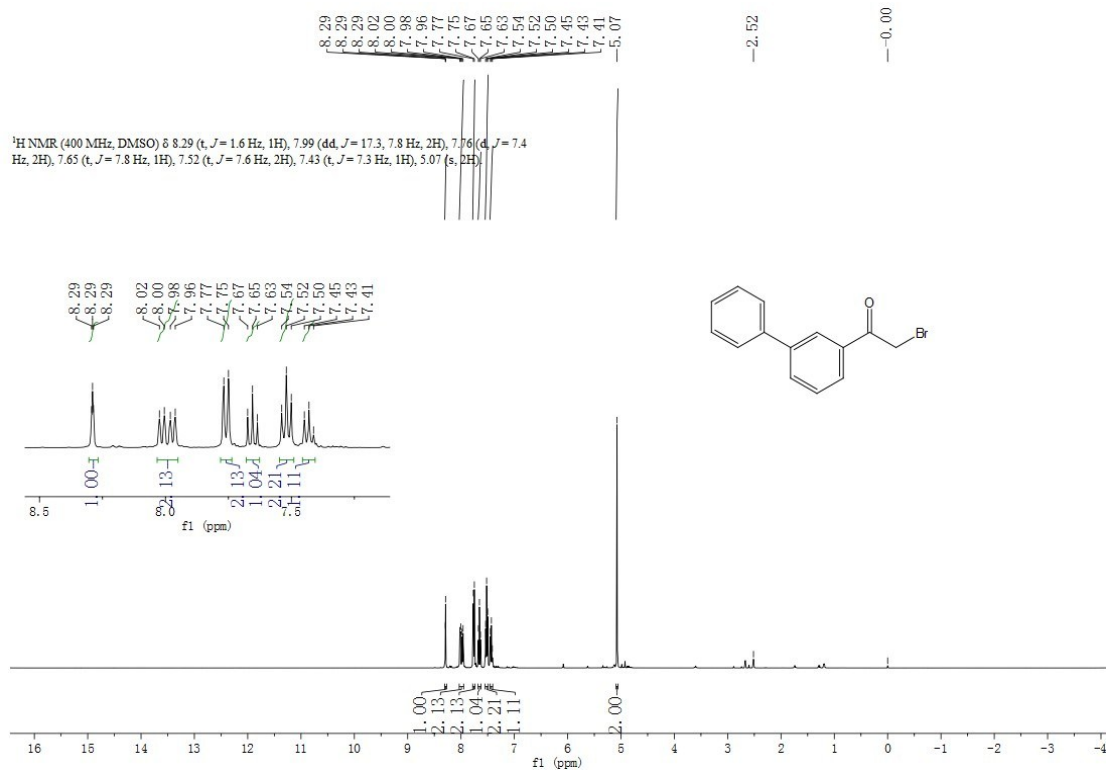

Fig. S8 NMR spectra of **2f**

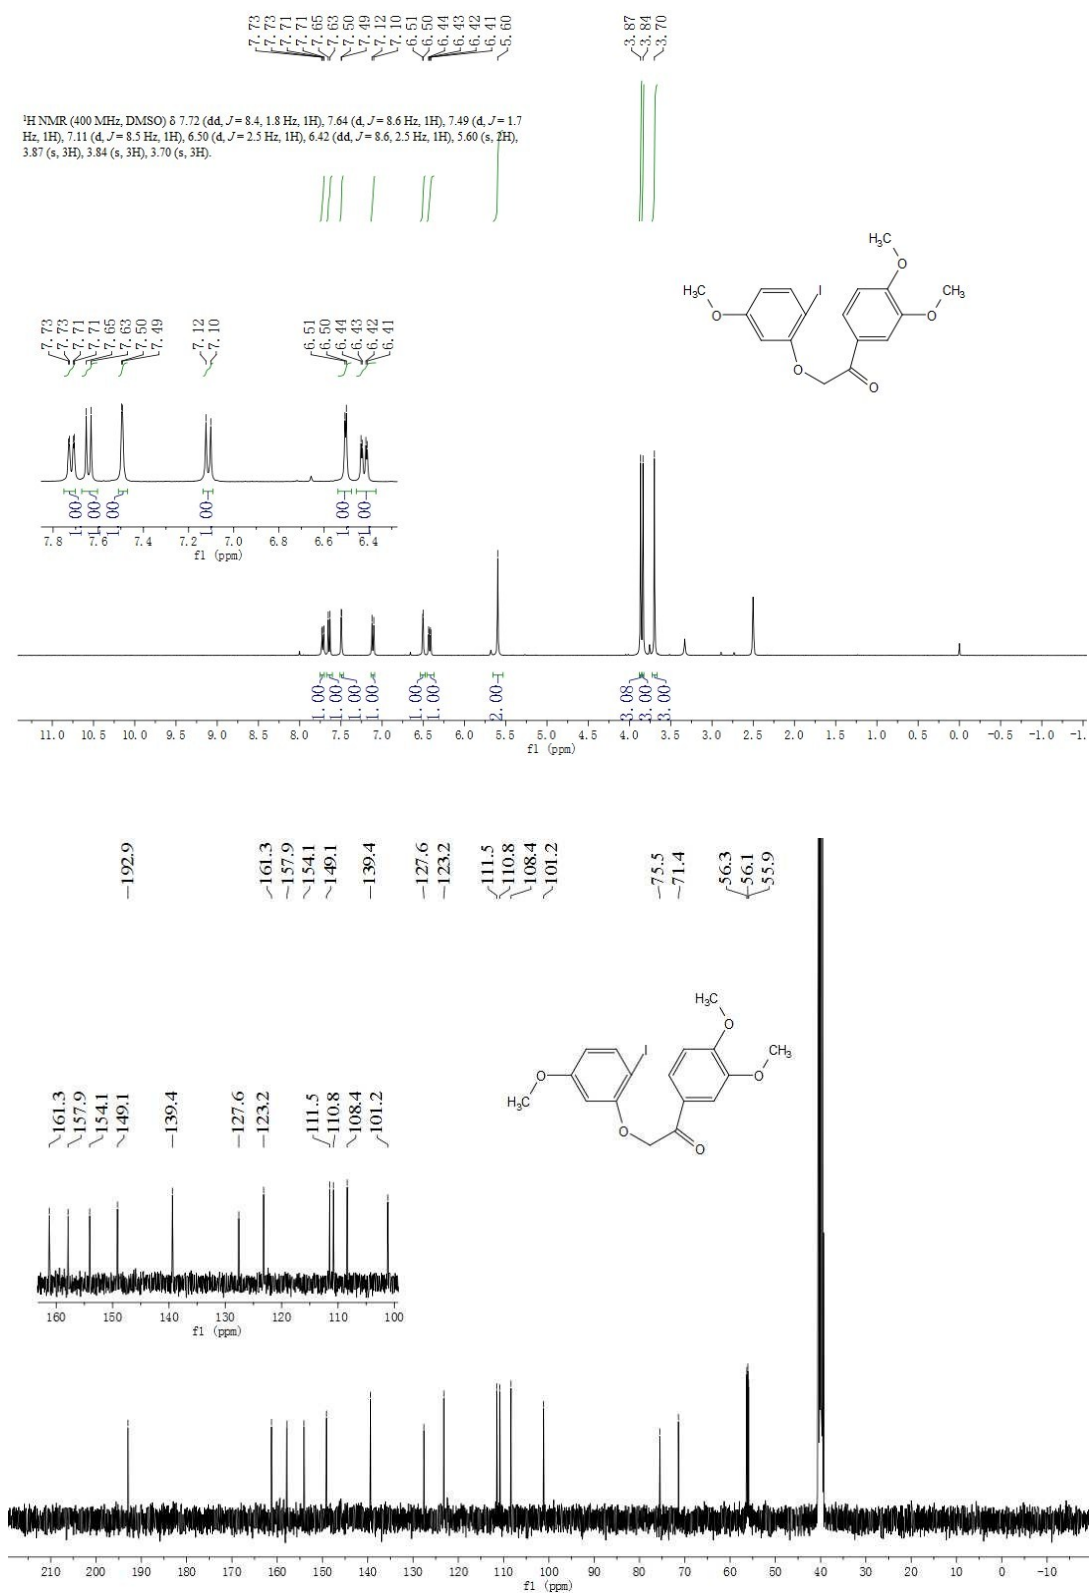

Fig. S9 NMR spectra of **3a**

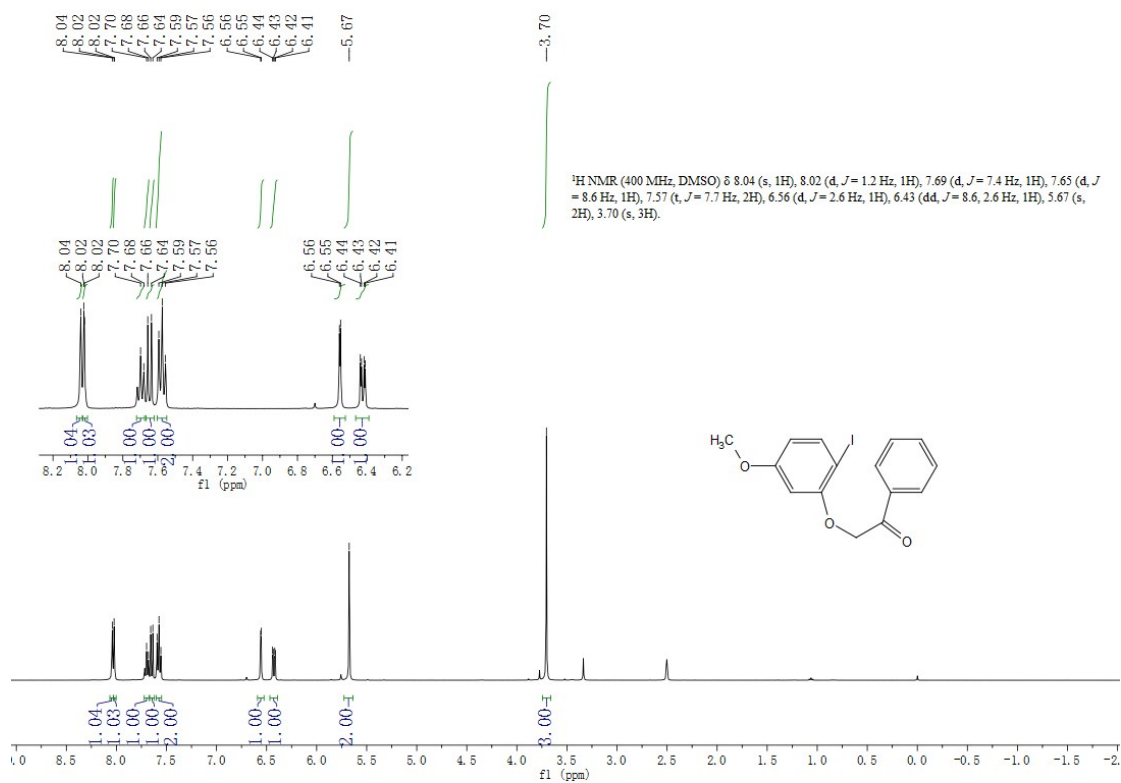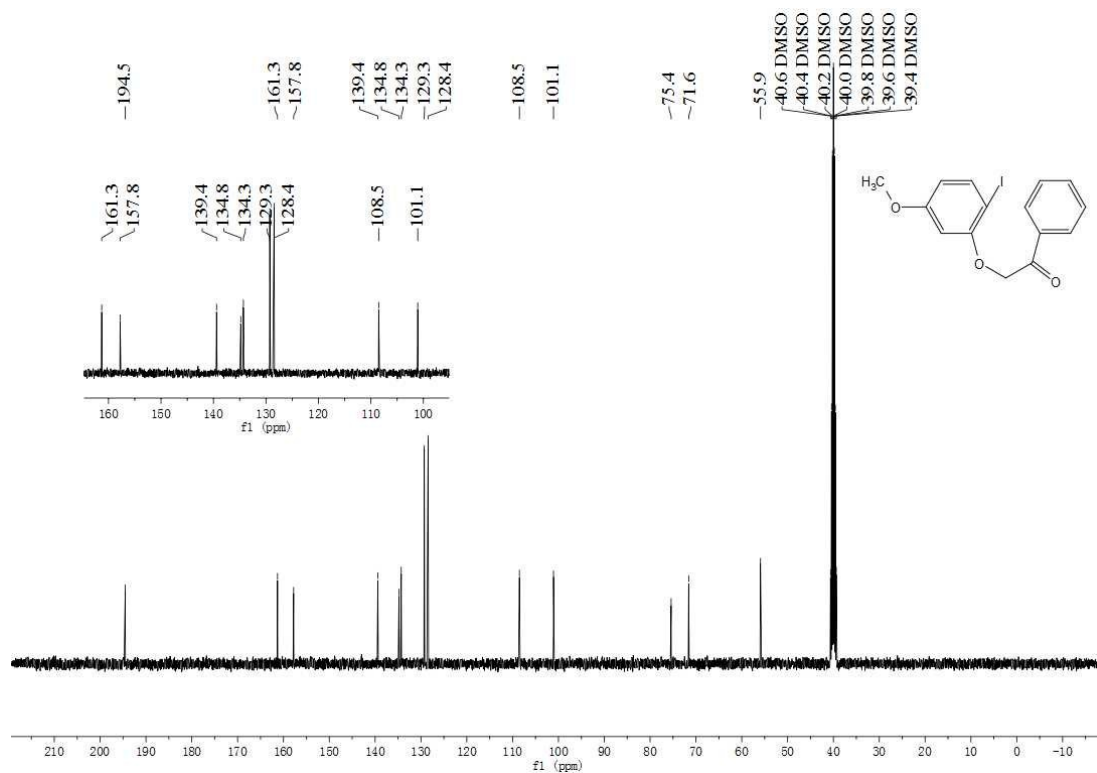

Fig. S10 NMR spectra of **3b**



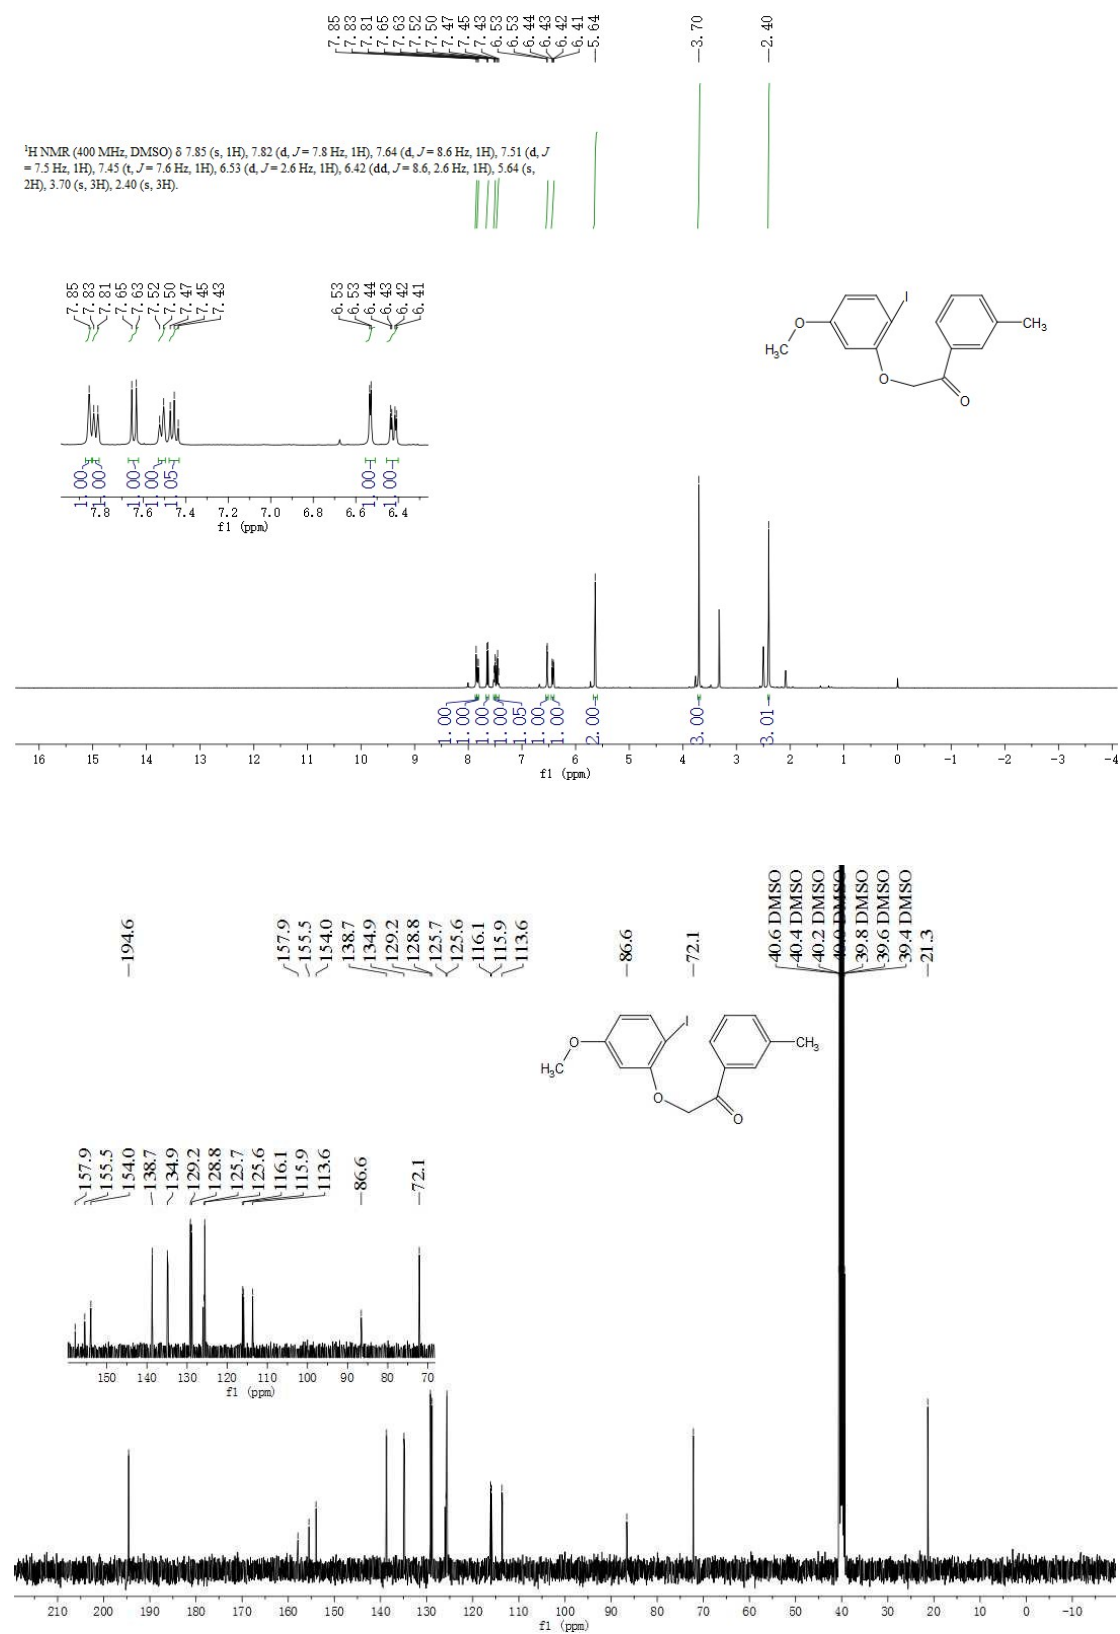

Fig. S11 NMR spectra of **3c**

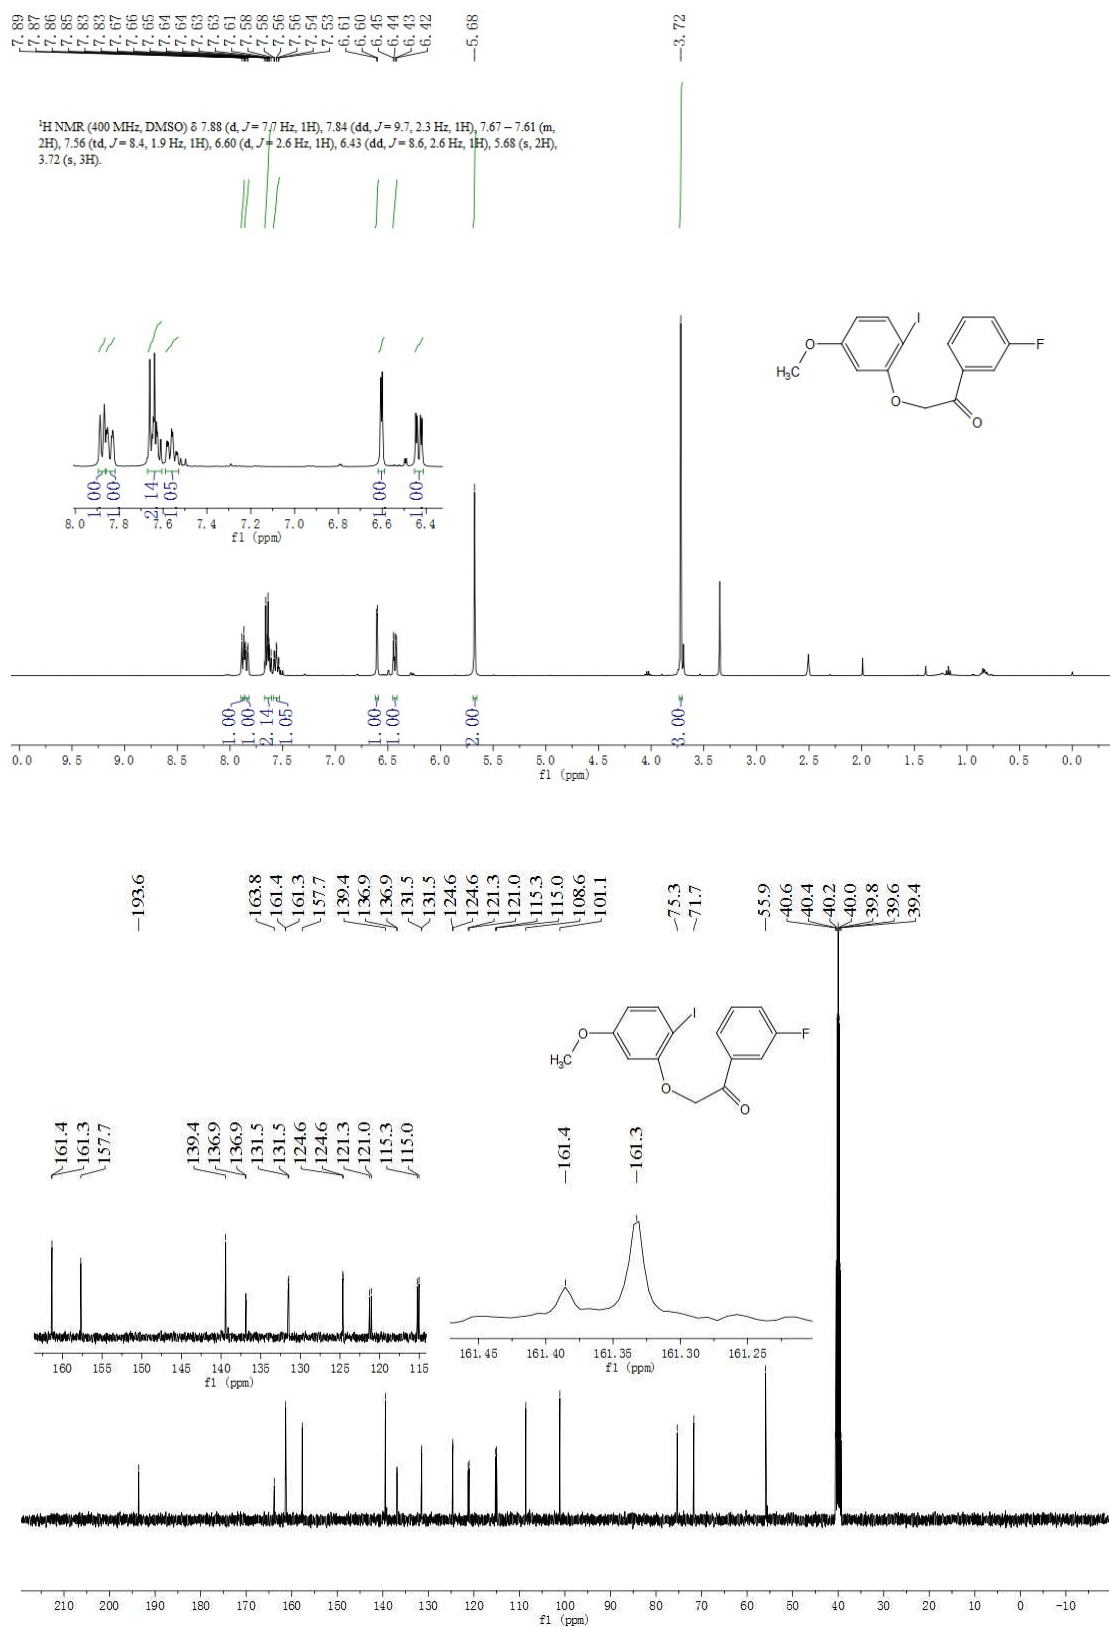

Fig. S12 NMR spectra of **3d**

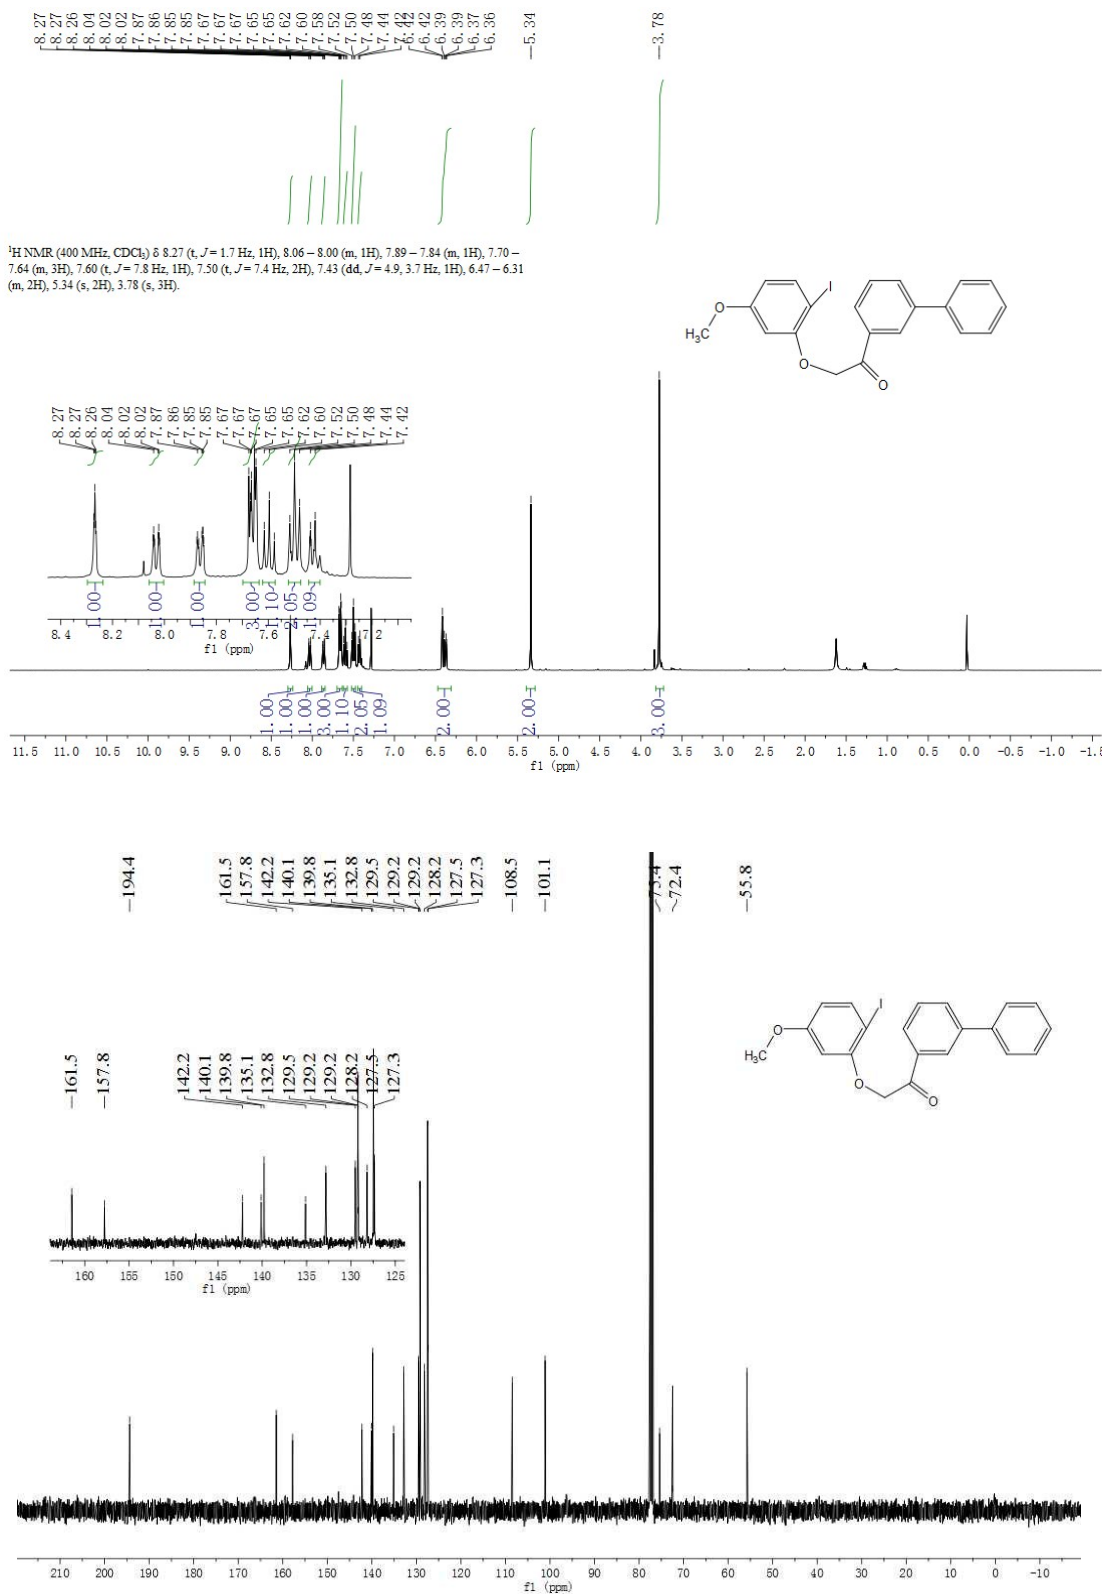

Fig. S13 NMR spectra of **3e**

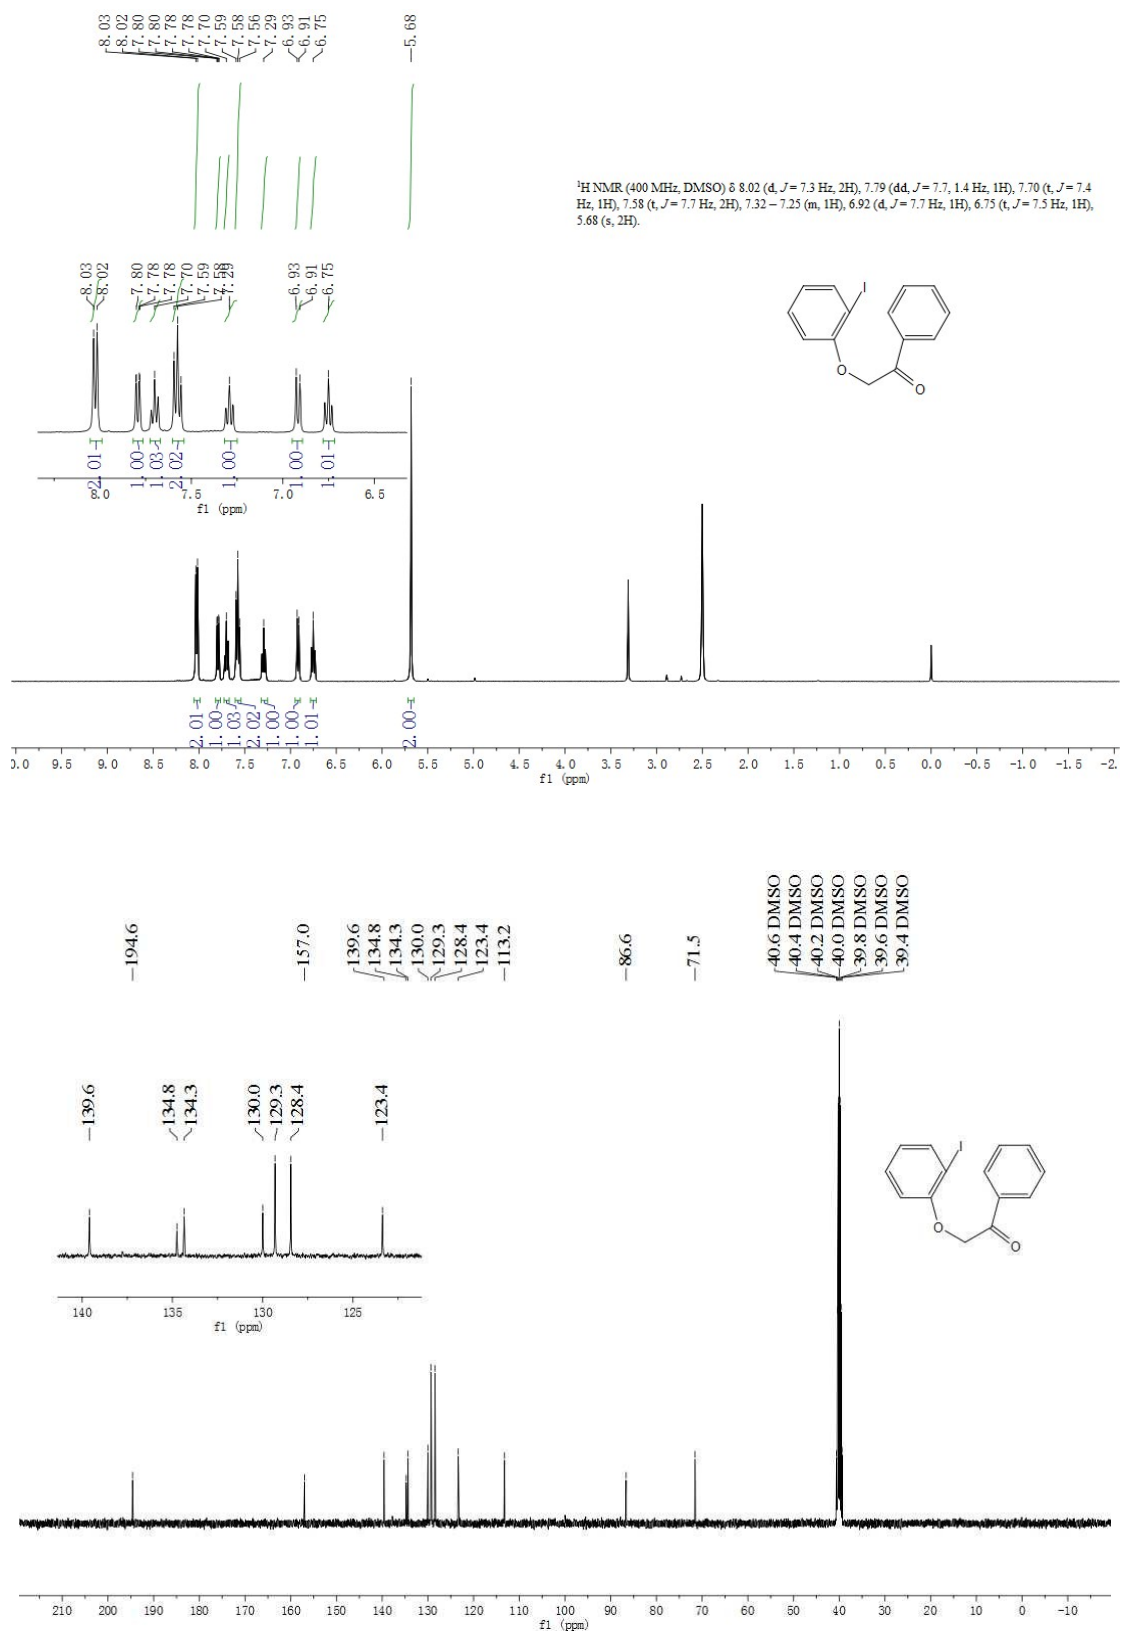

Fig. S14 NMR spectra of **3f**

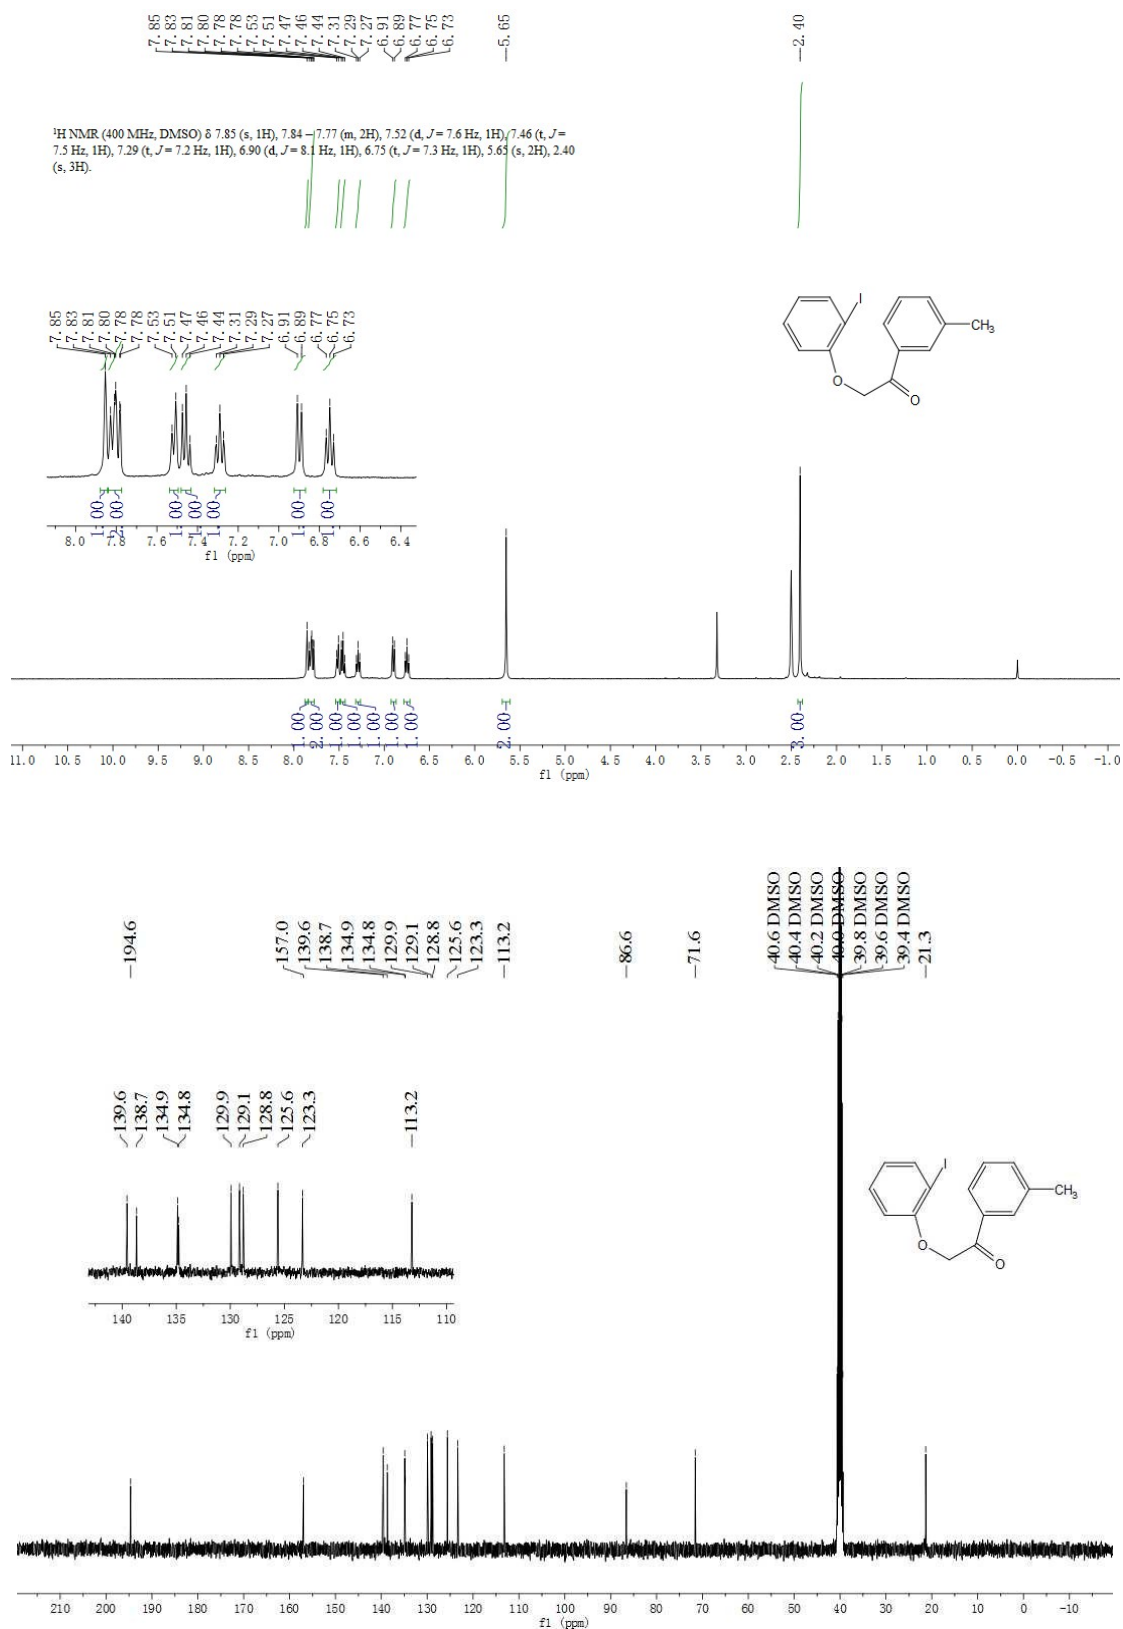

Fig. S15 NMR spectra of **3g**

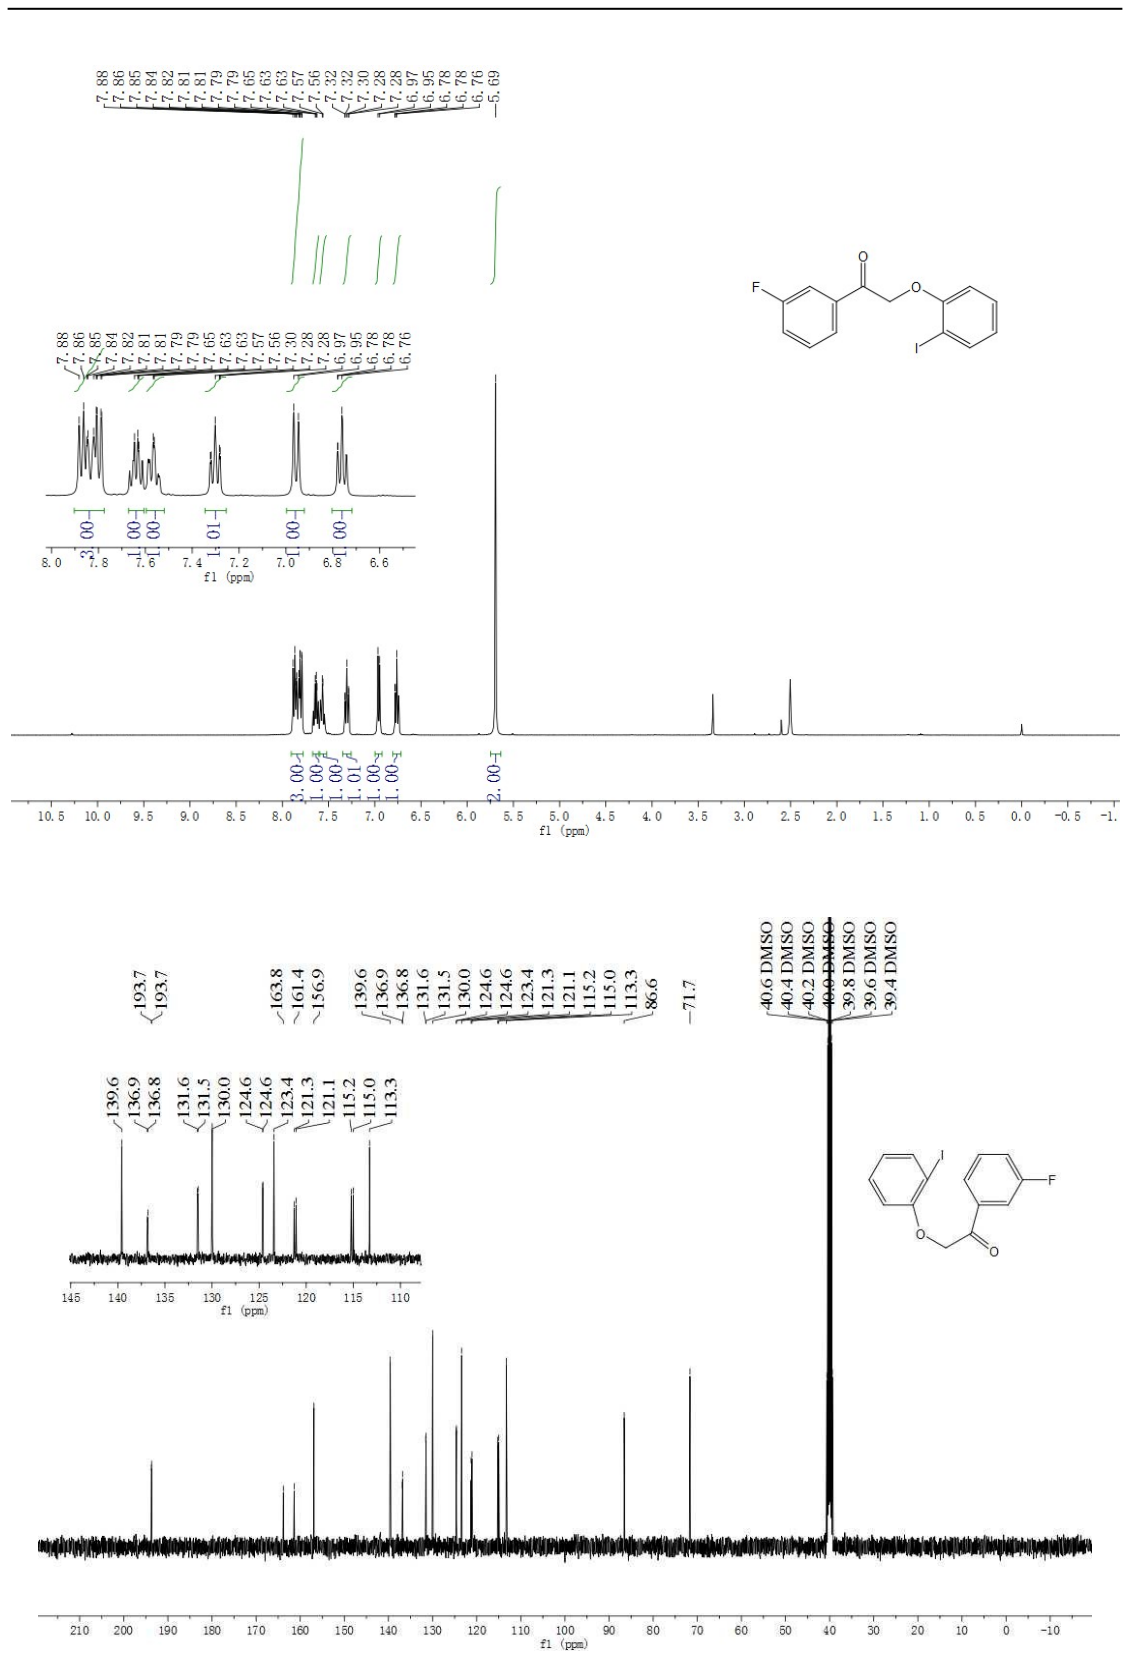

Fig. S16 NMR spectra of **3h**

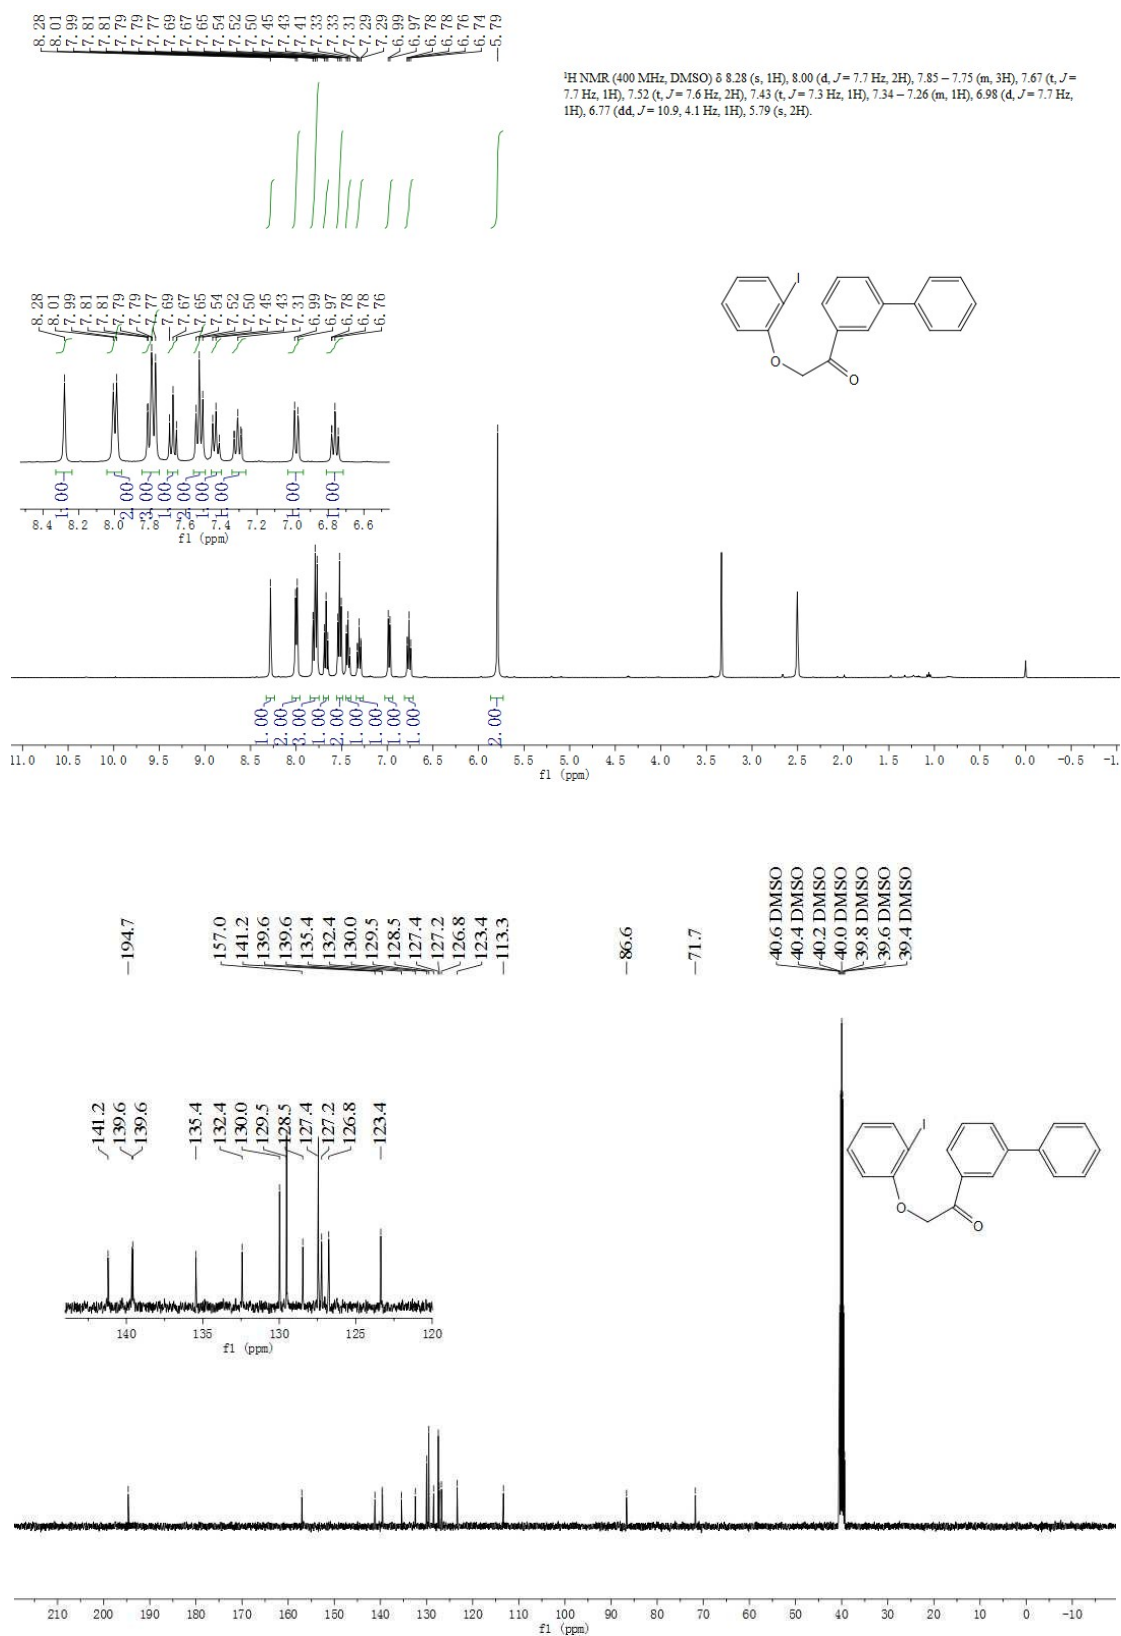

Fig. S17 NMR spectra of **3i**

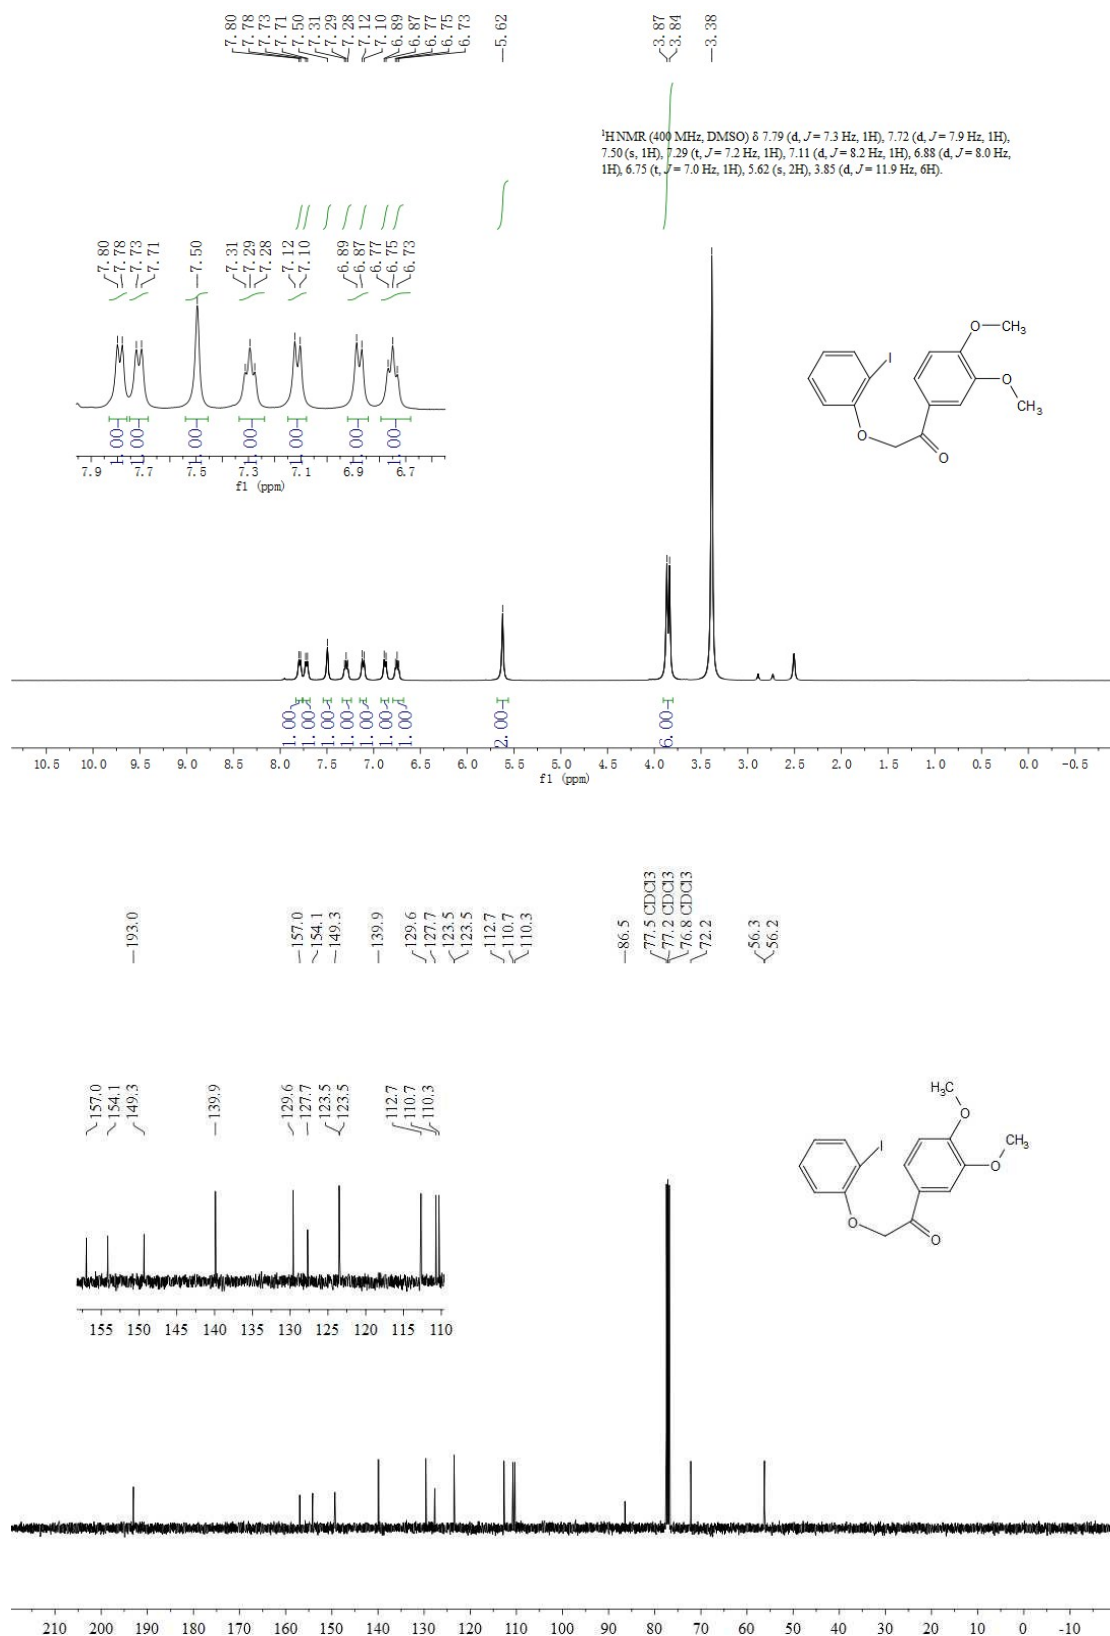

Fig. S18 NMR spectra of **3j**



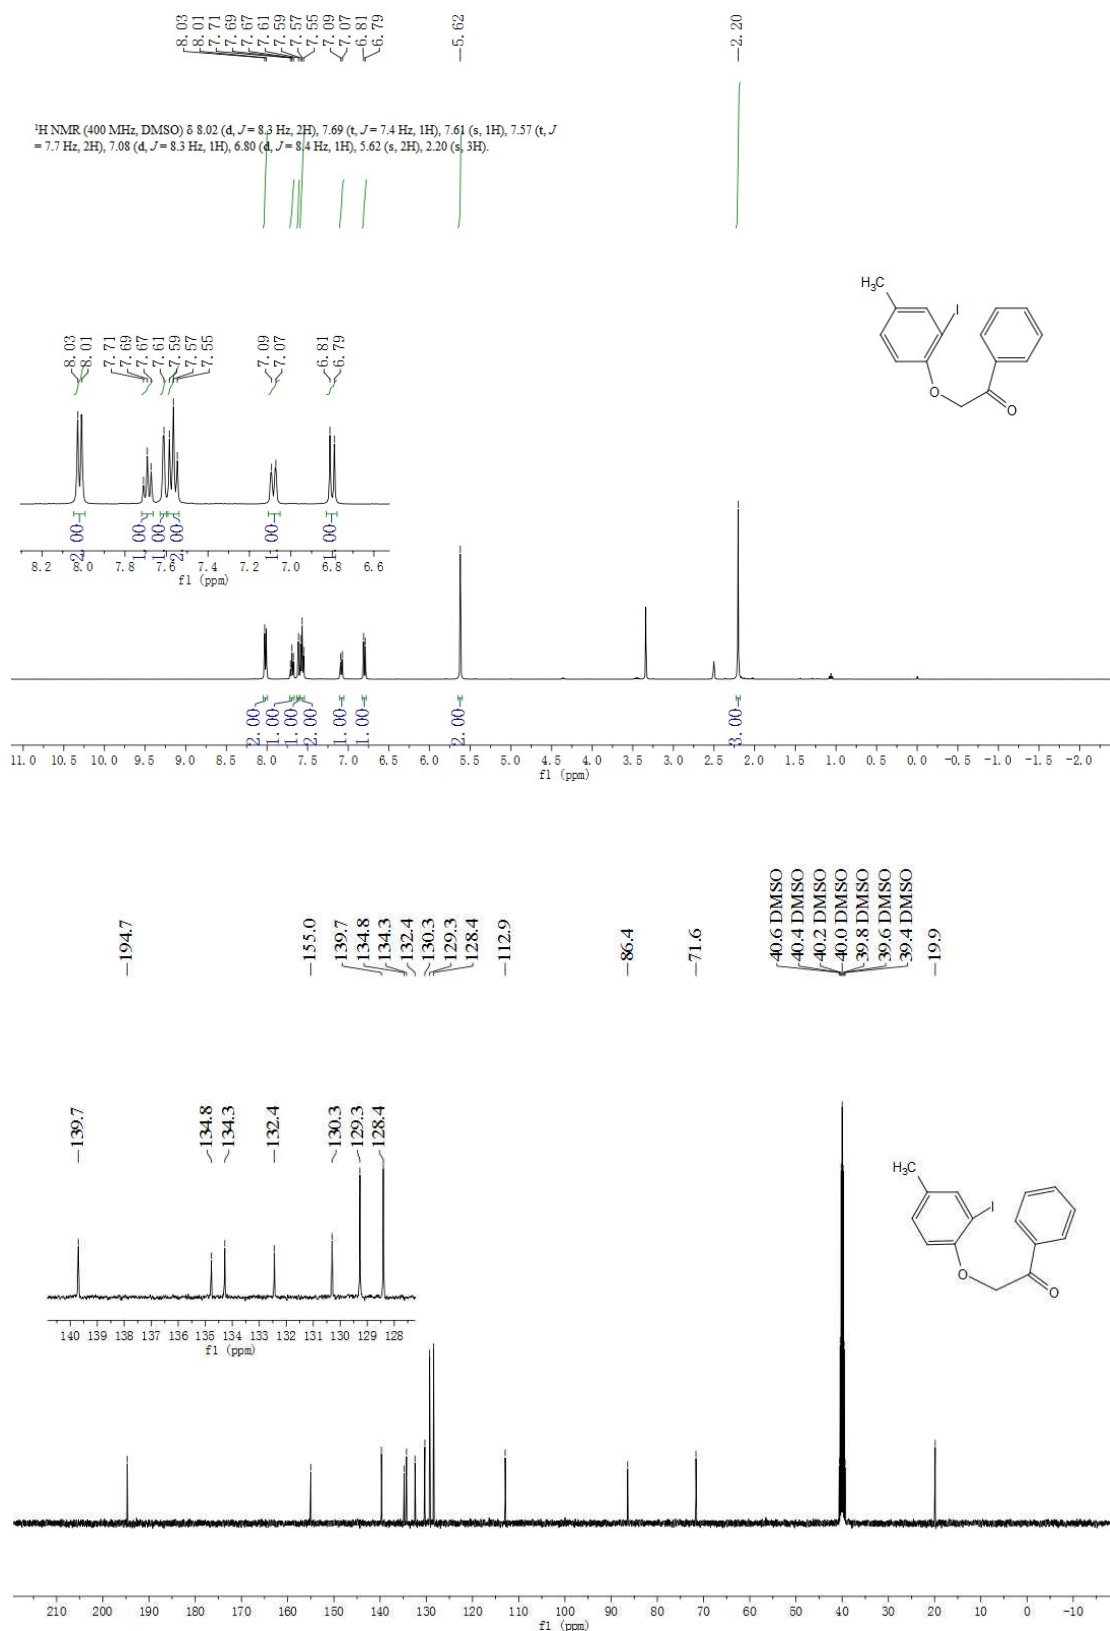

Fig. S19 NMR spectra of **3k**

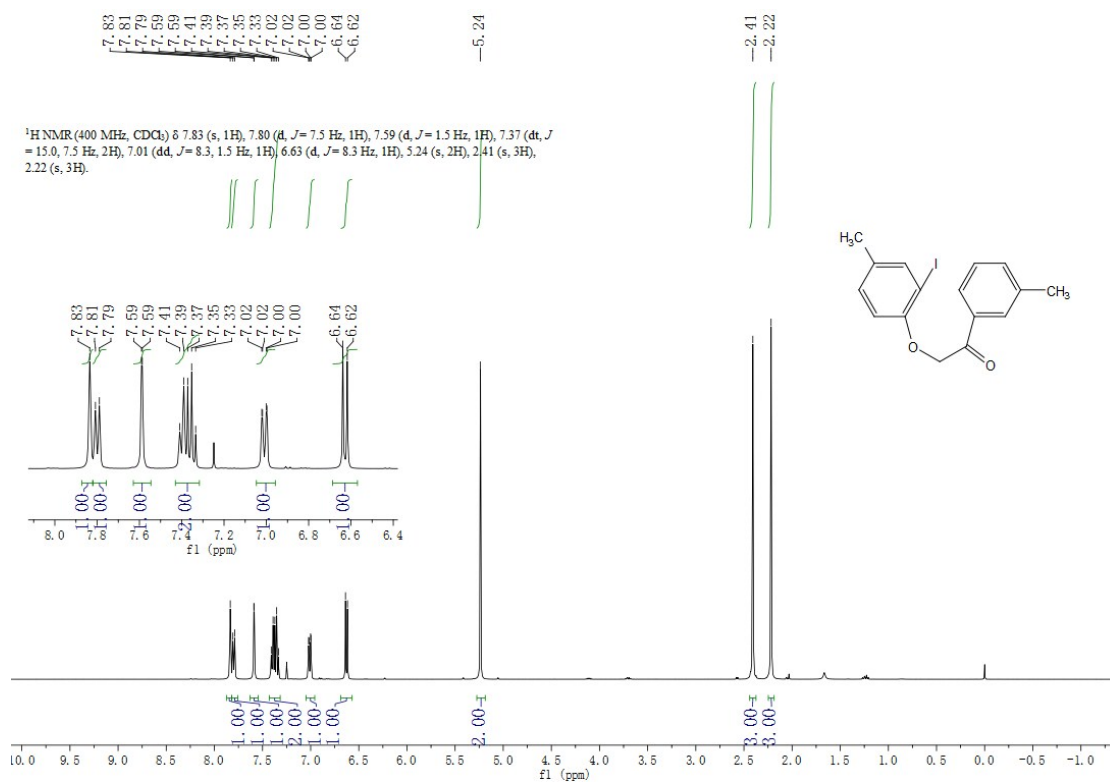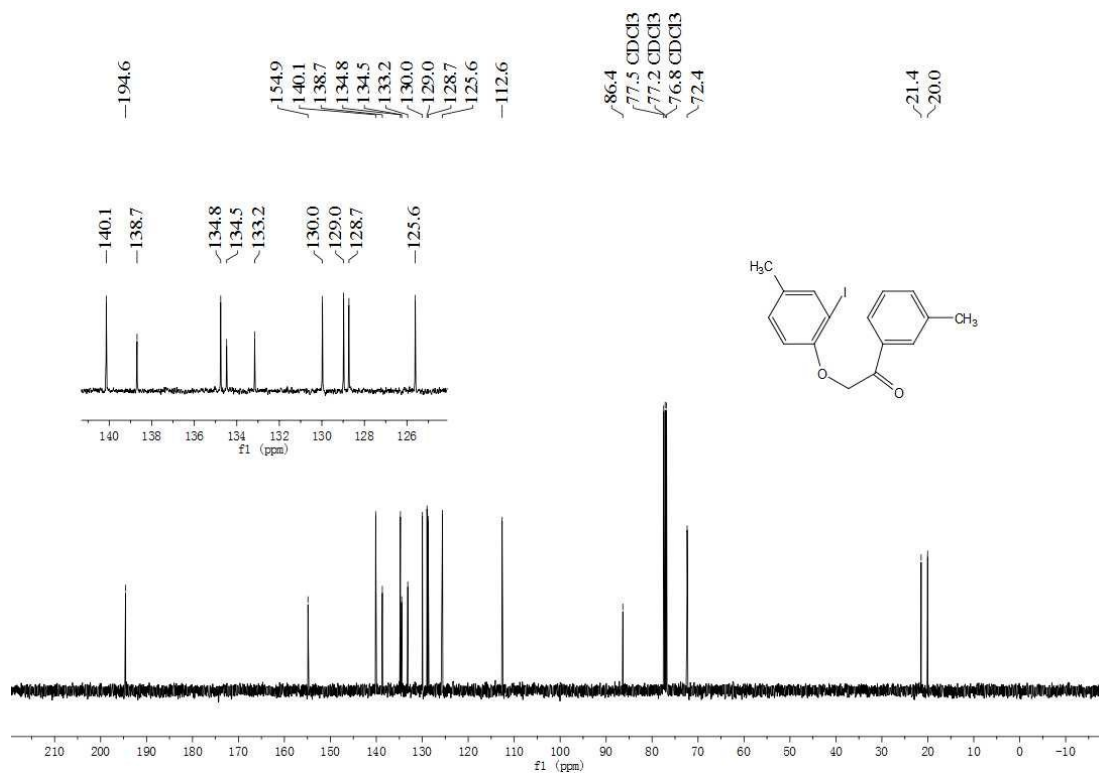

Fig. S20 NMR spectra of **31**

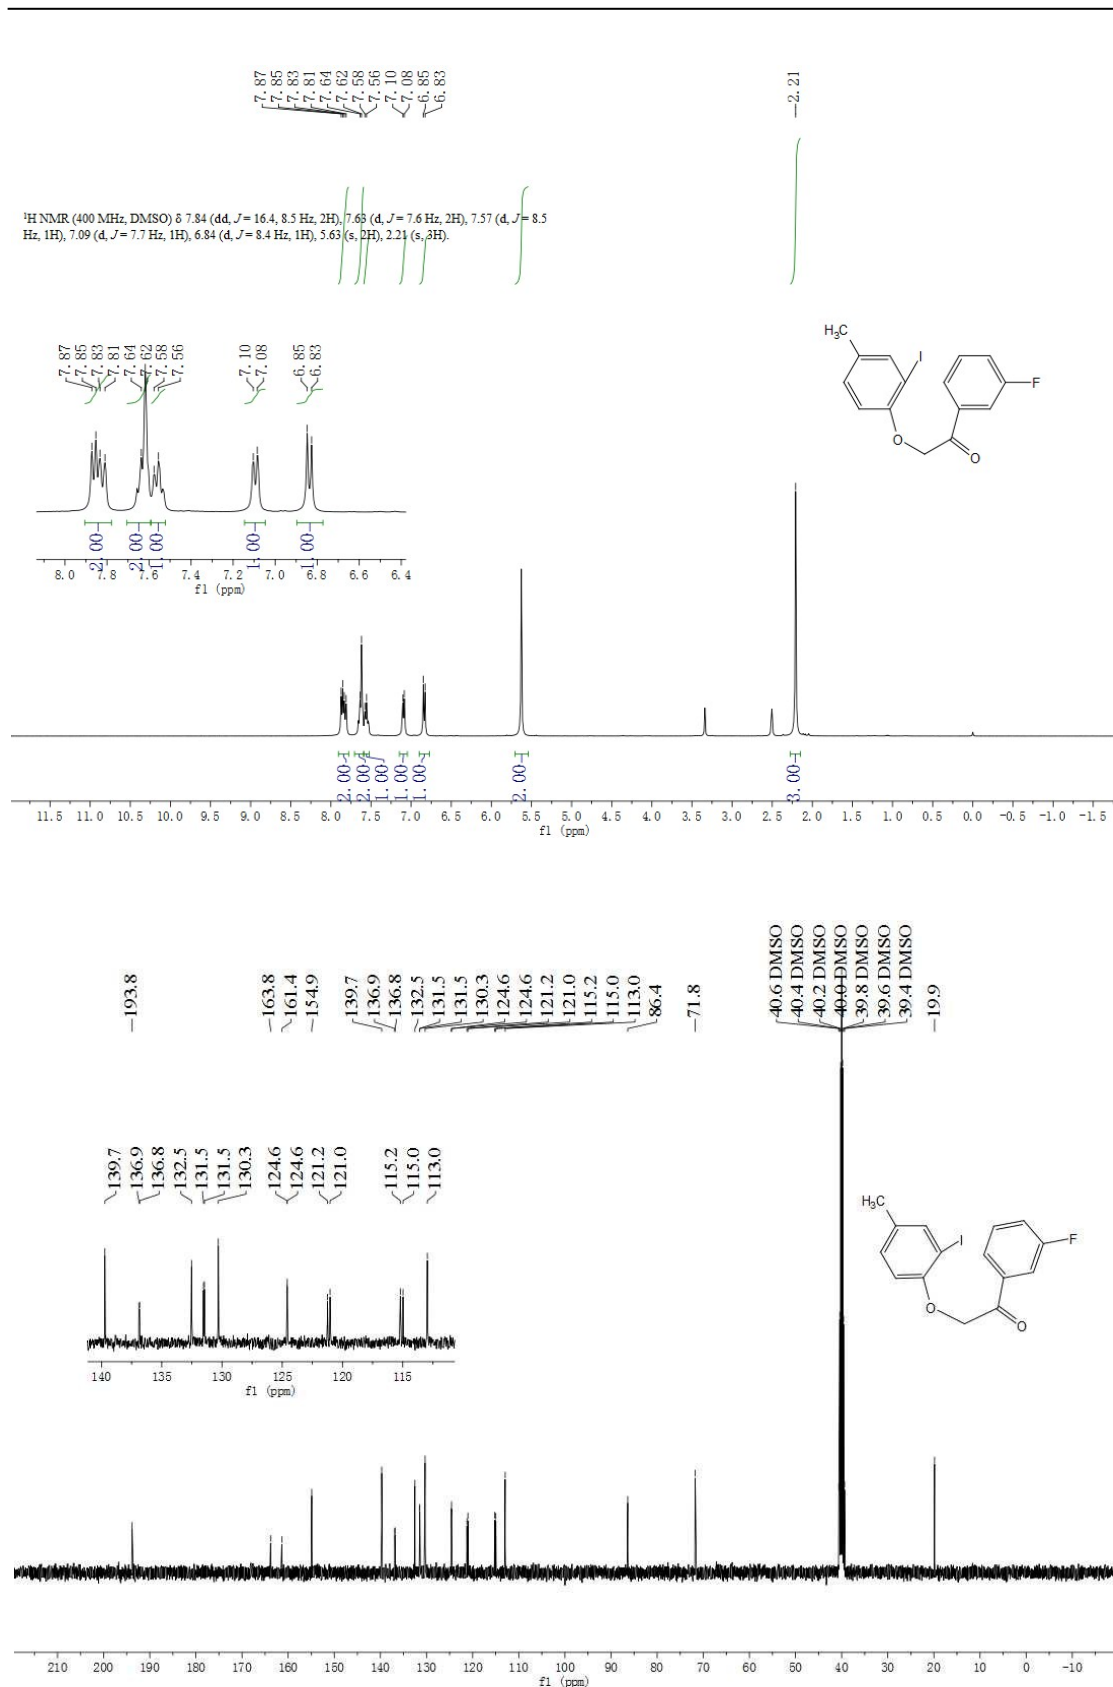

Fig. S21 NMR spectra of **3m**

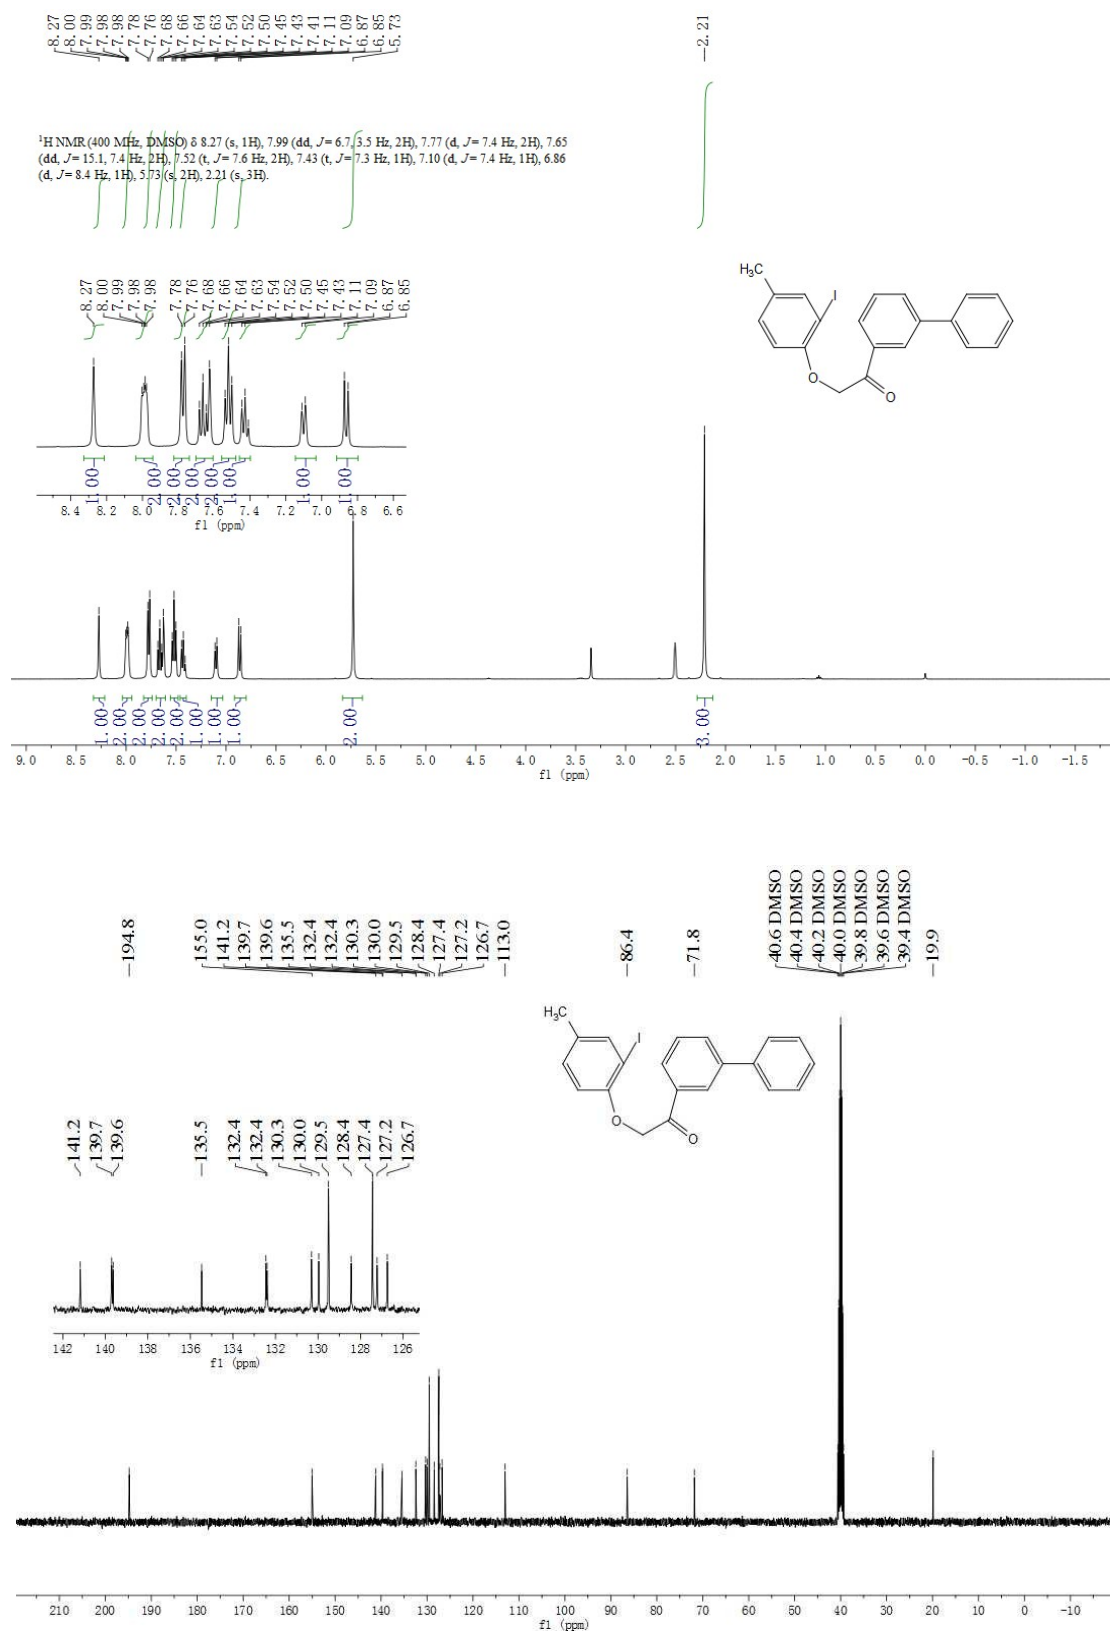

Fig. S22 NMR spectra of **3n**

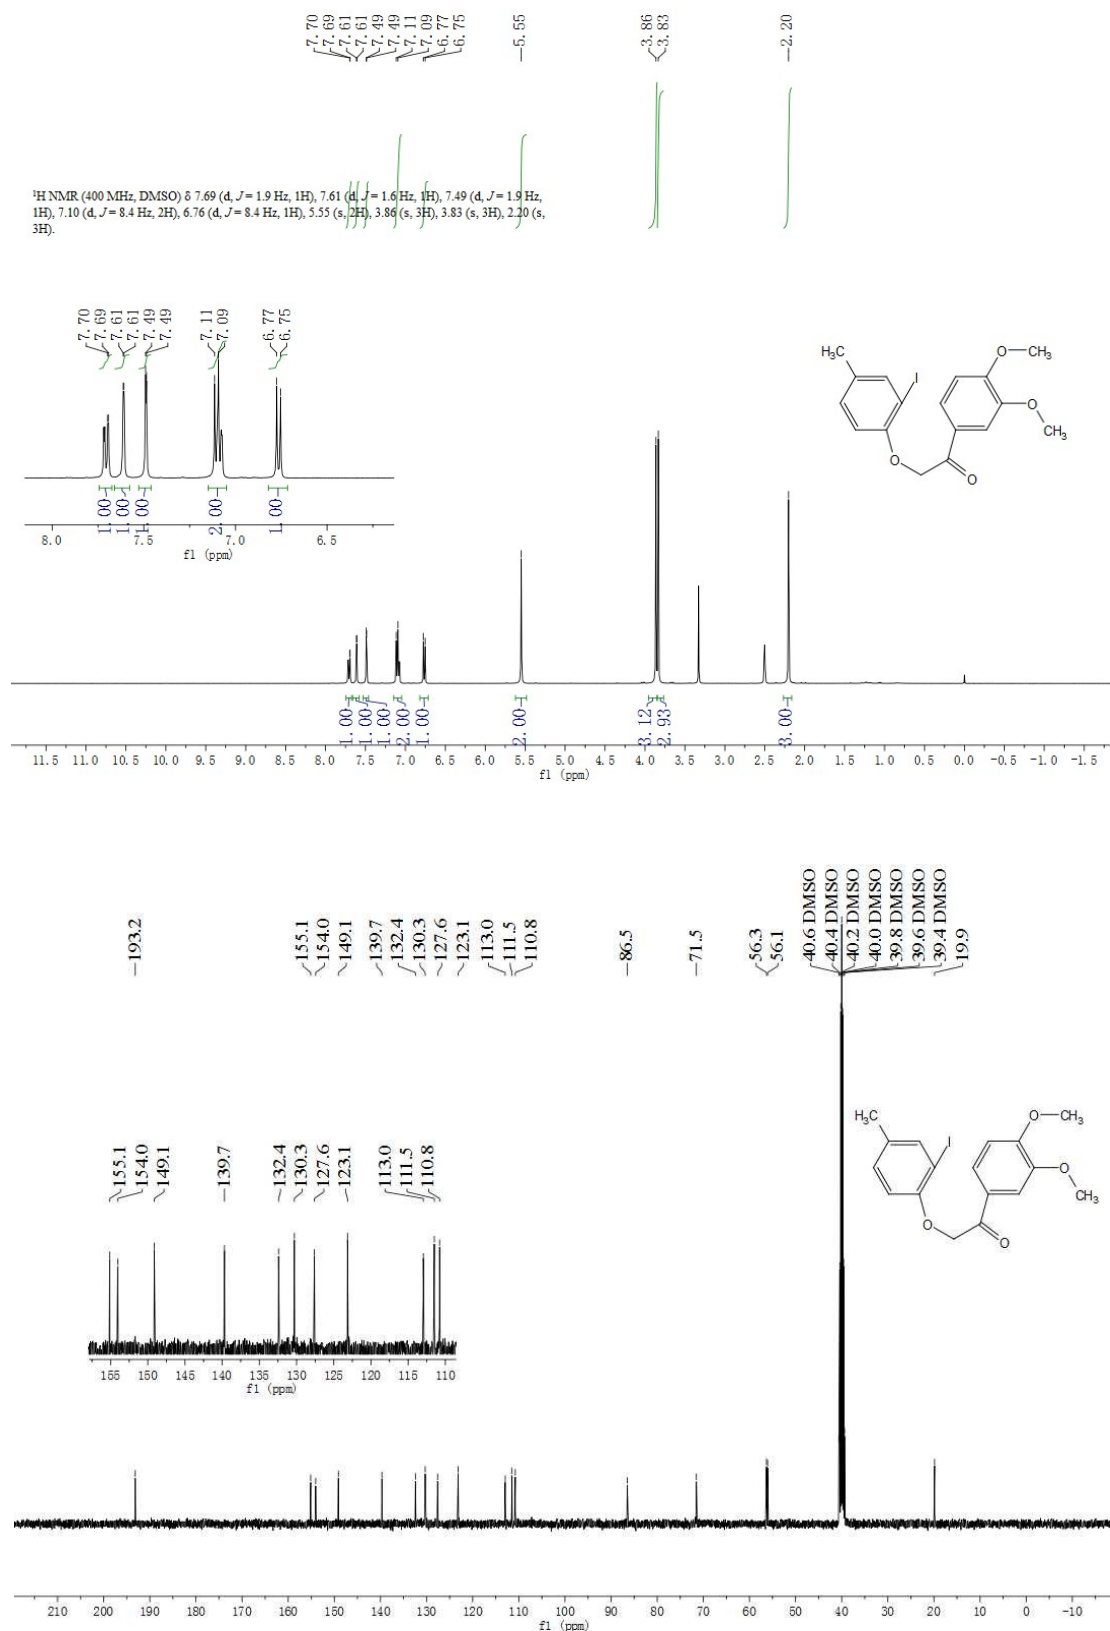

Fig. S23 NMR spectra of **30**

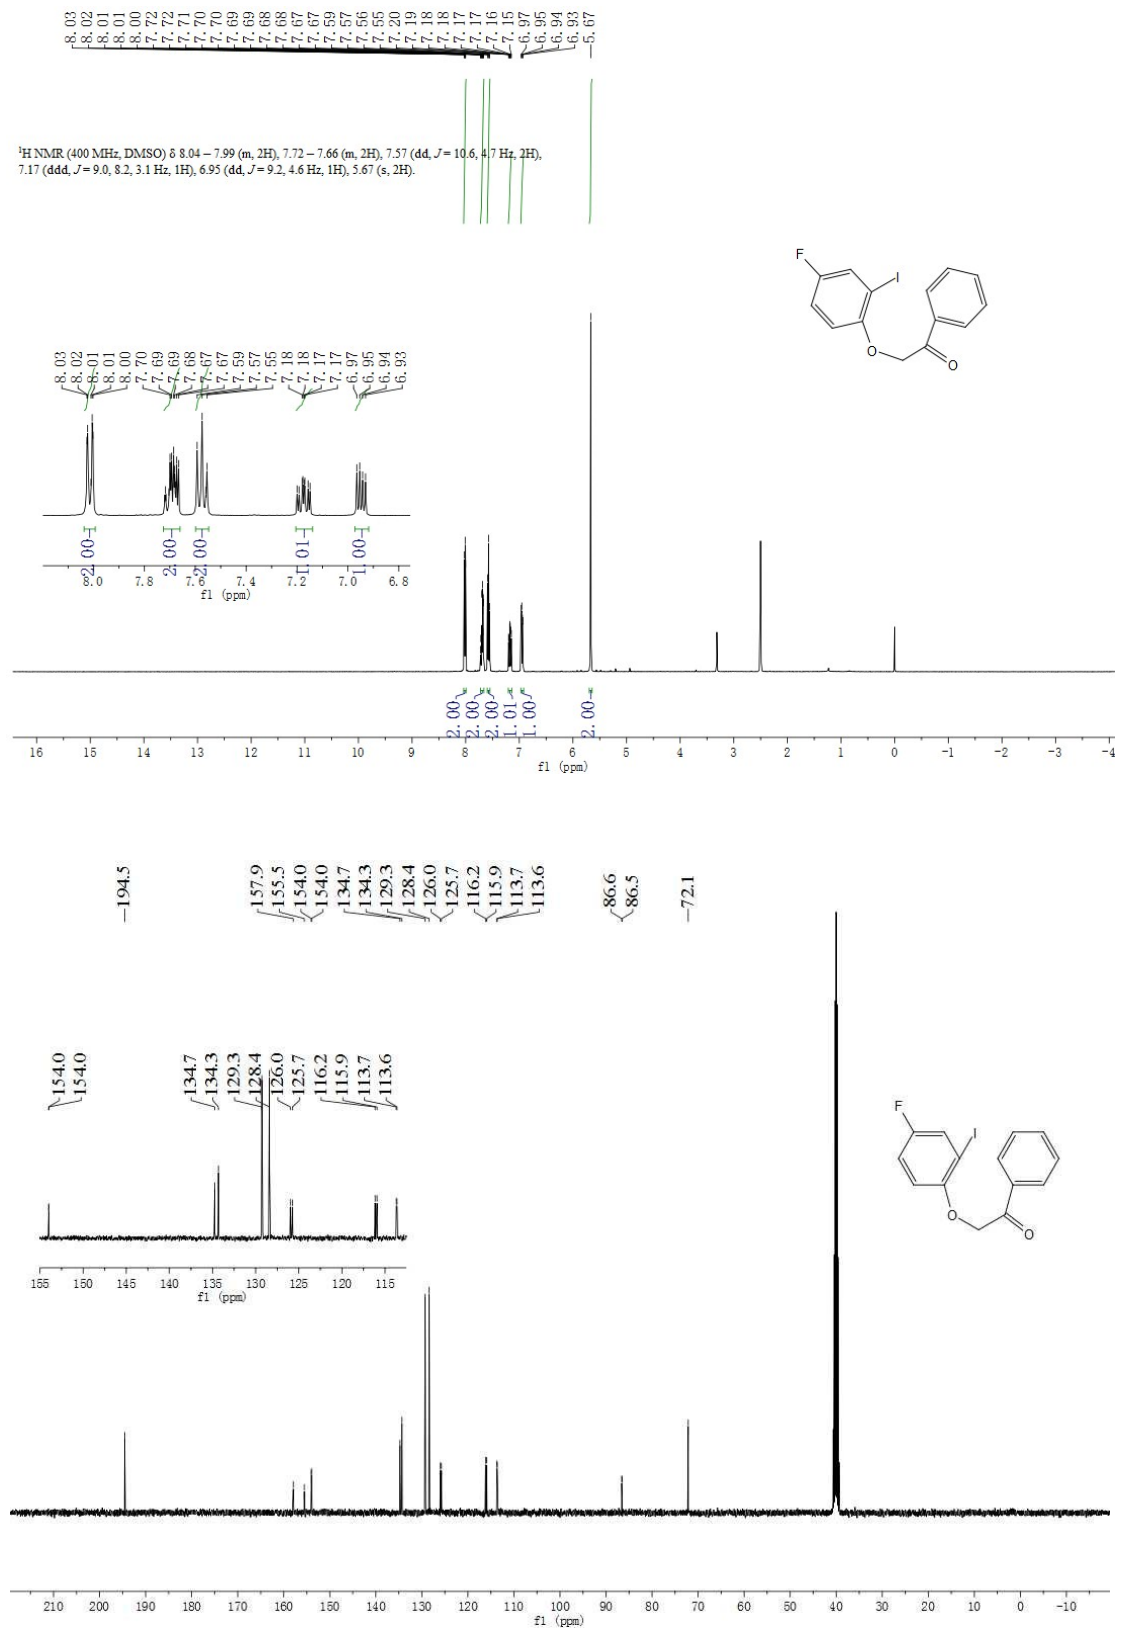

Fig. S24 NMR spectra of **3p**

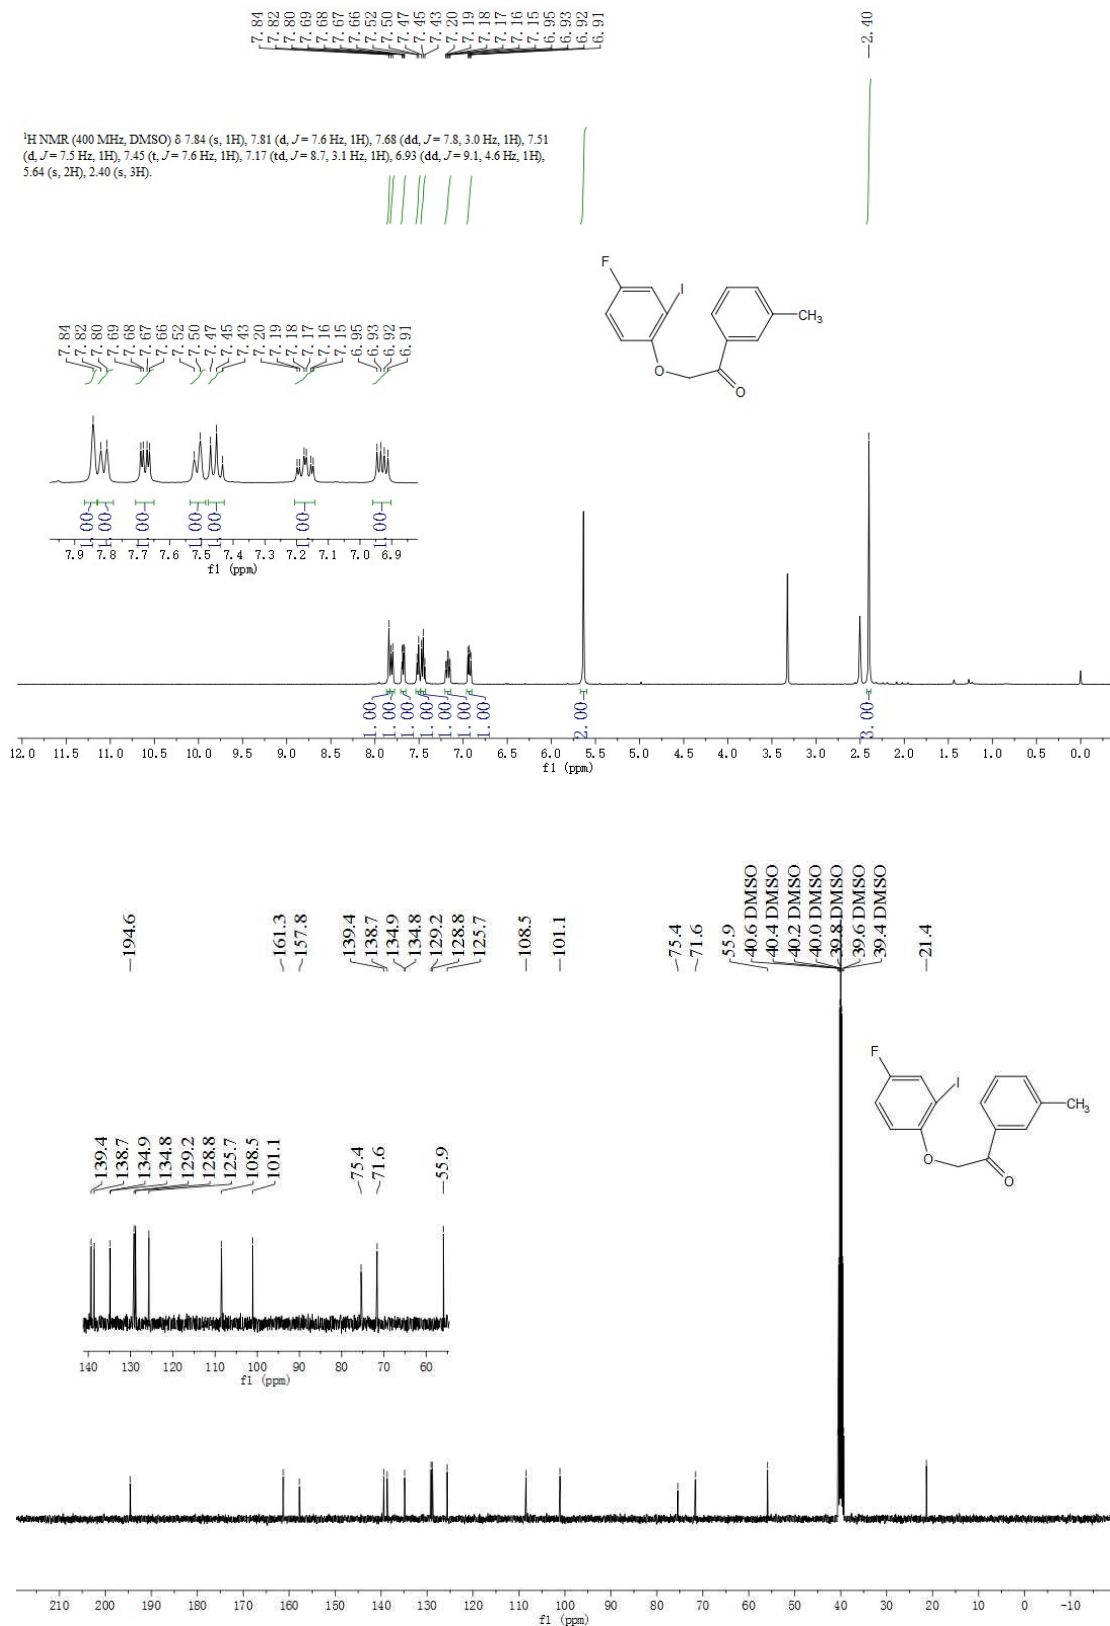

Fig. S25 NMR spectra of **3q**

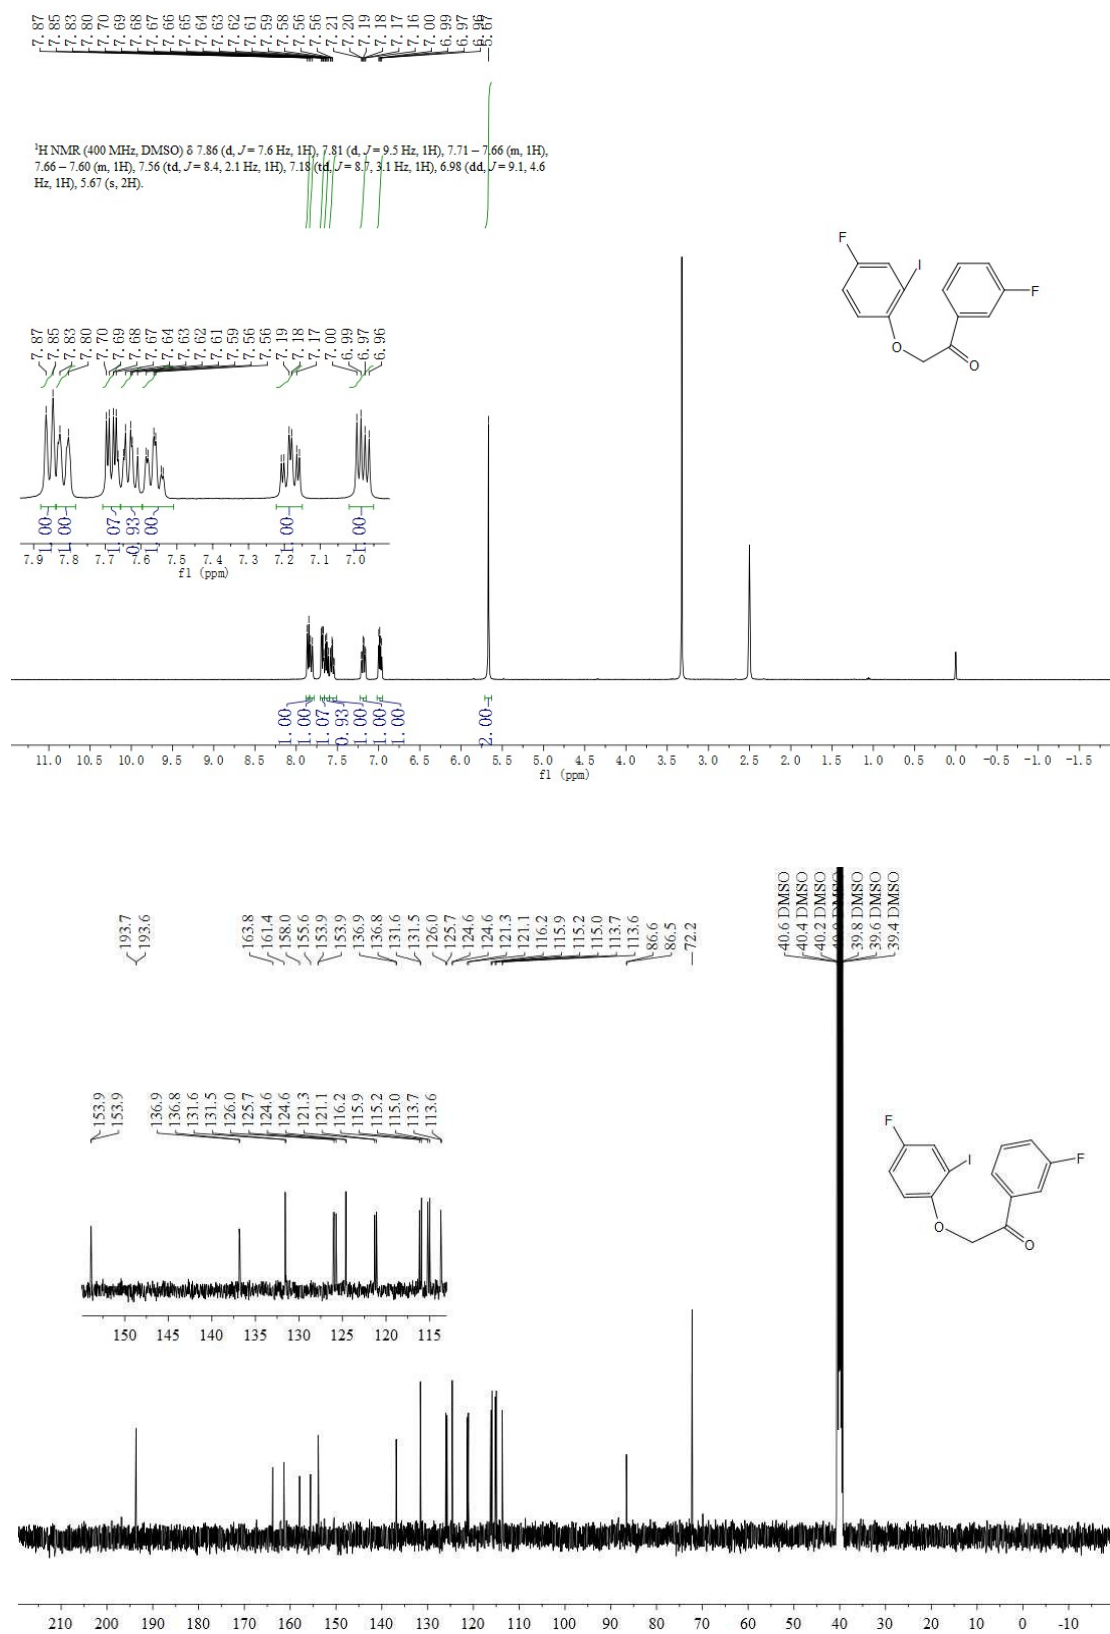

Fig. S26 NMR spectra of **3r**



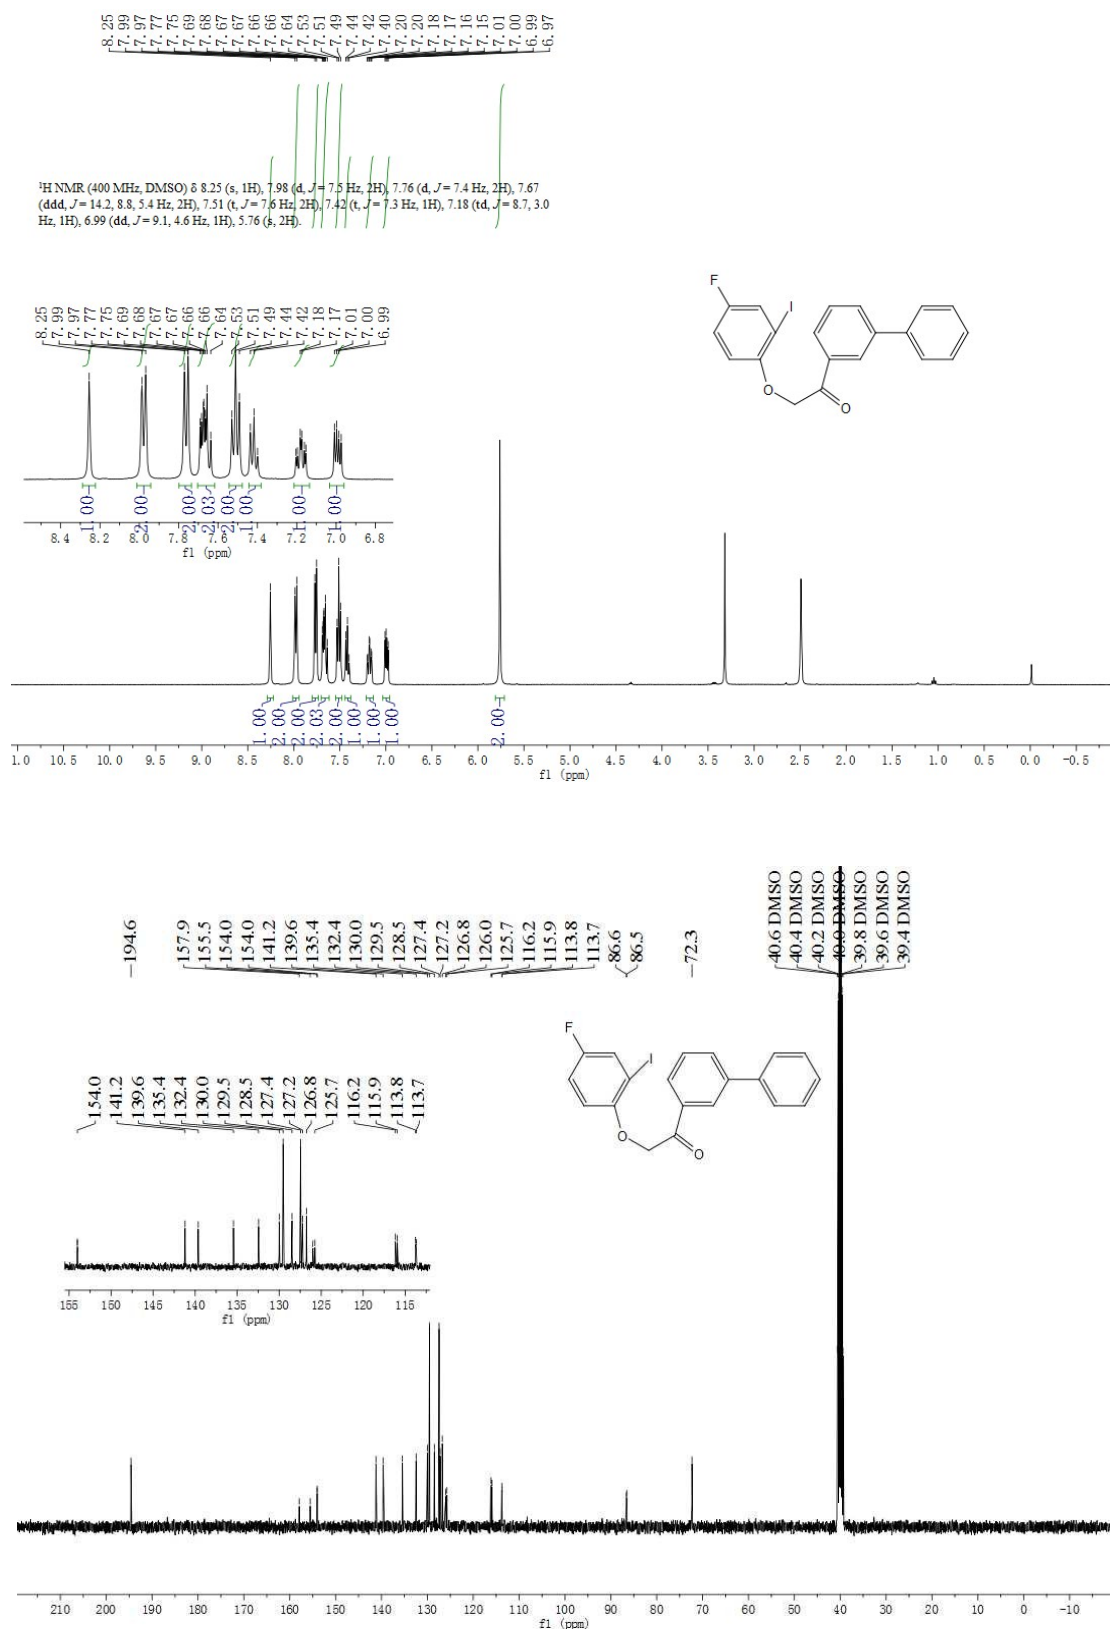

Fig. S27 NMR spectra of **3s**

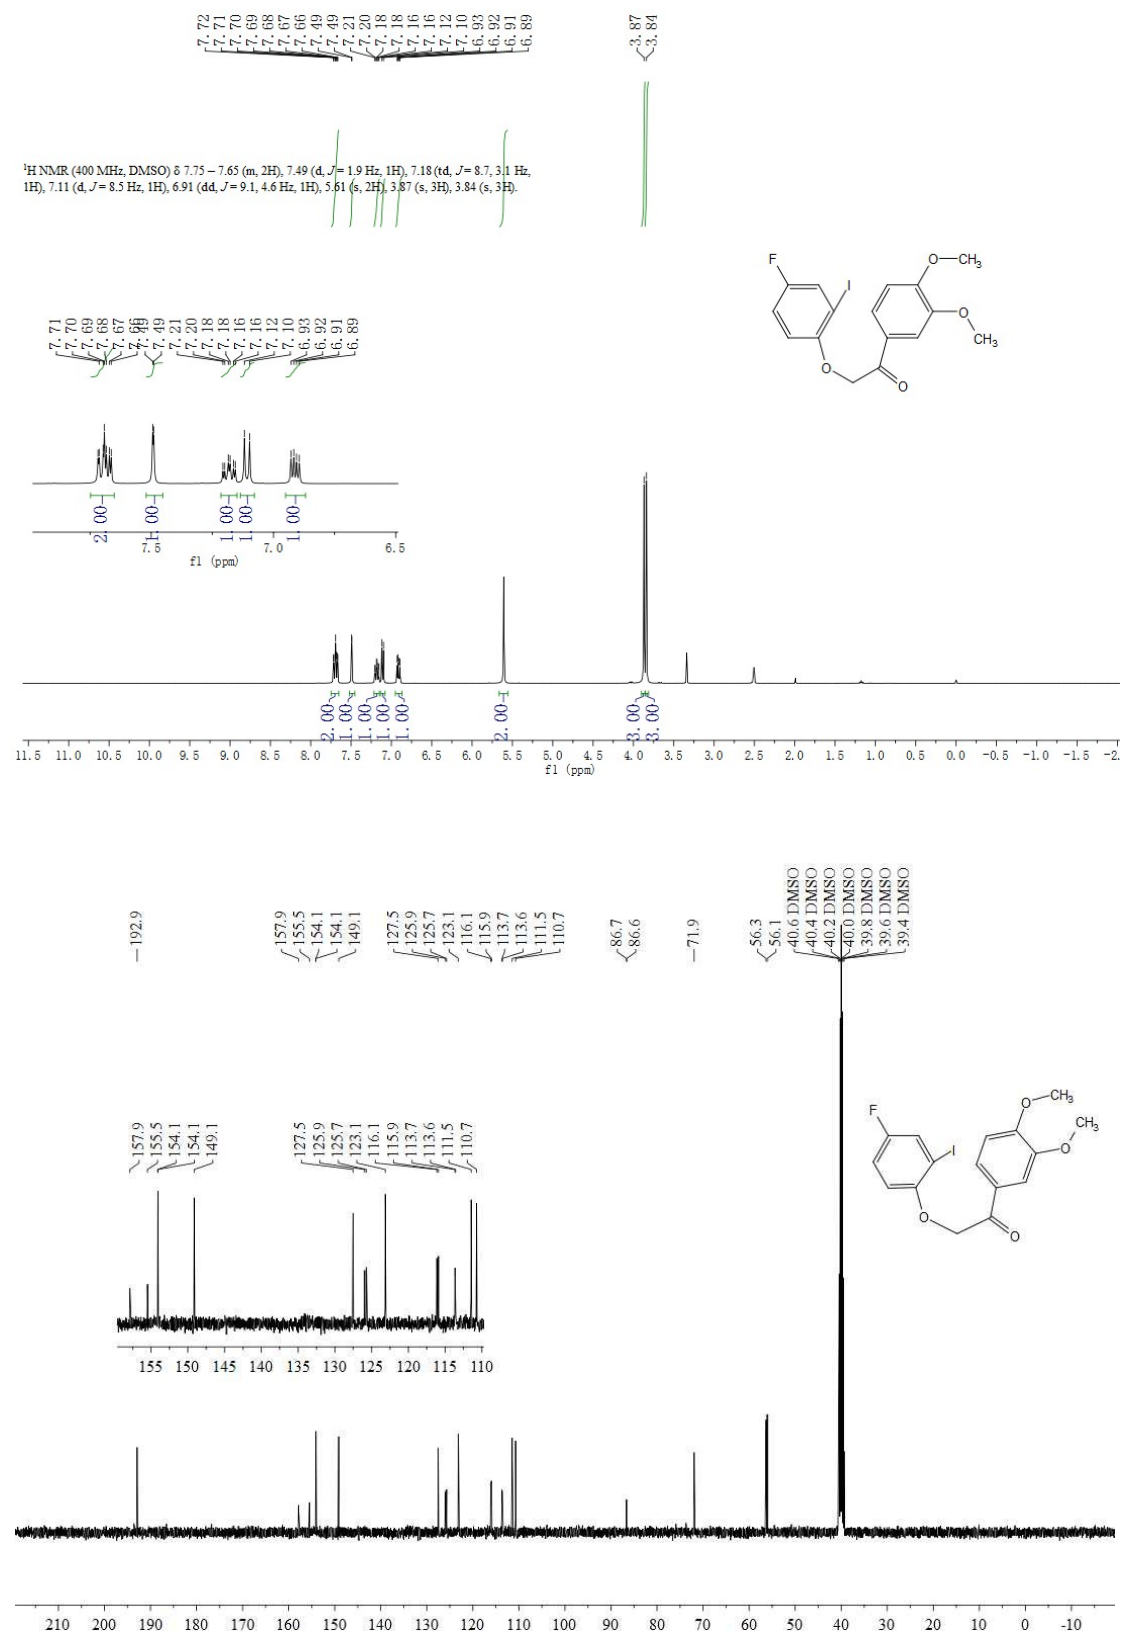

Fig. S28 NMR spectra of **3t**

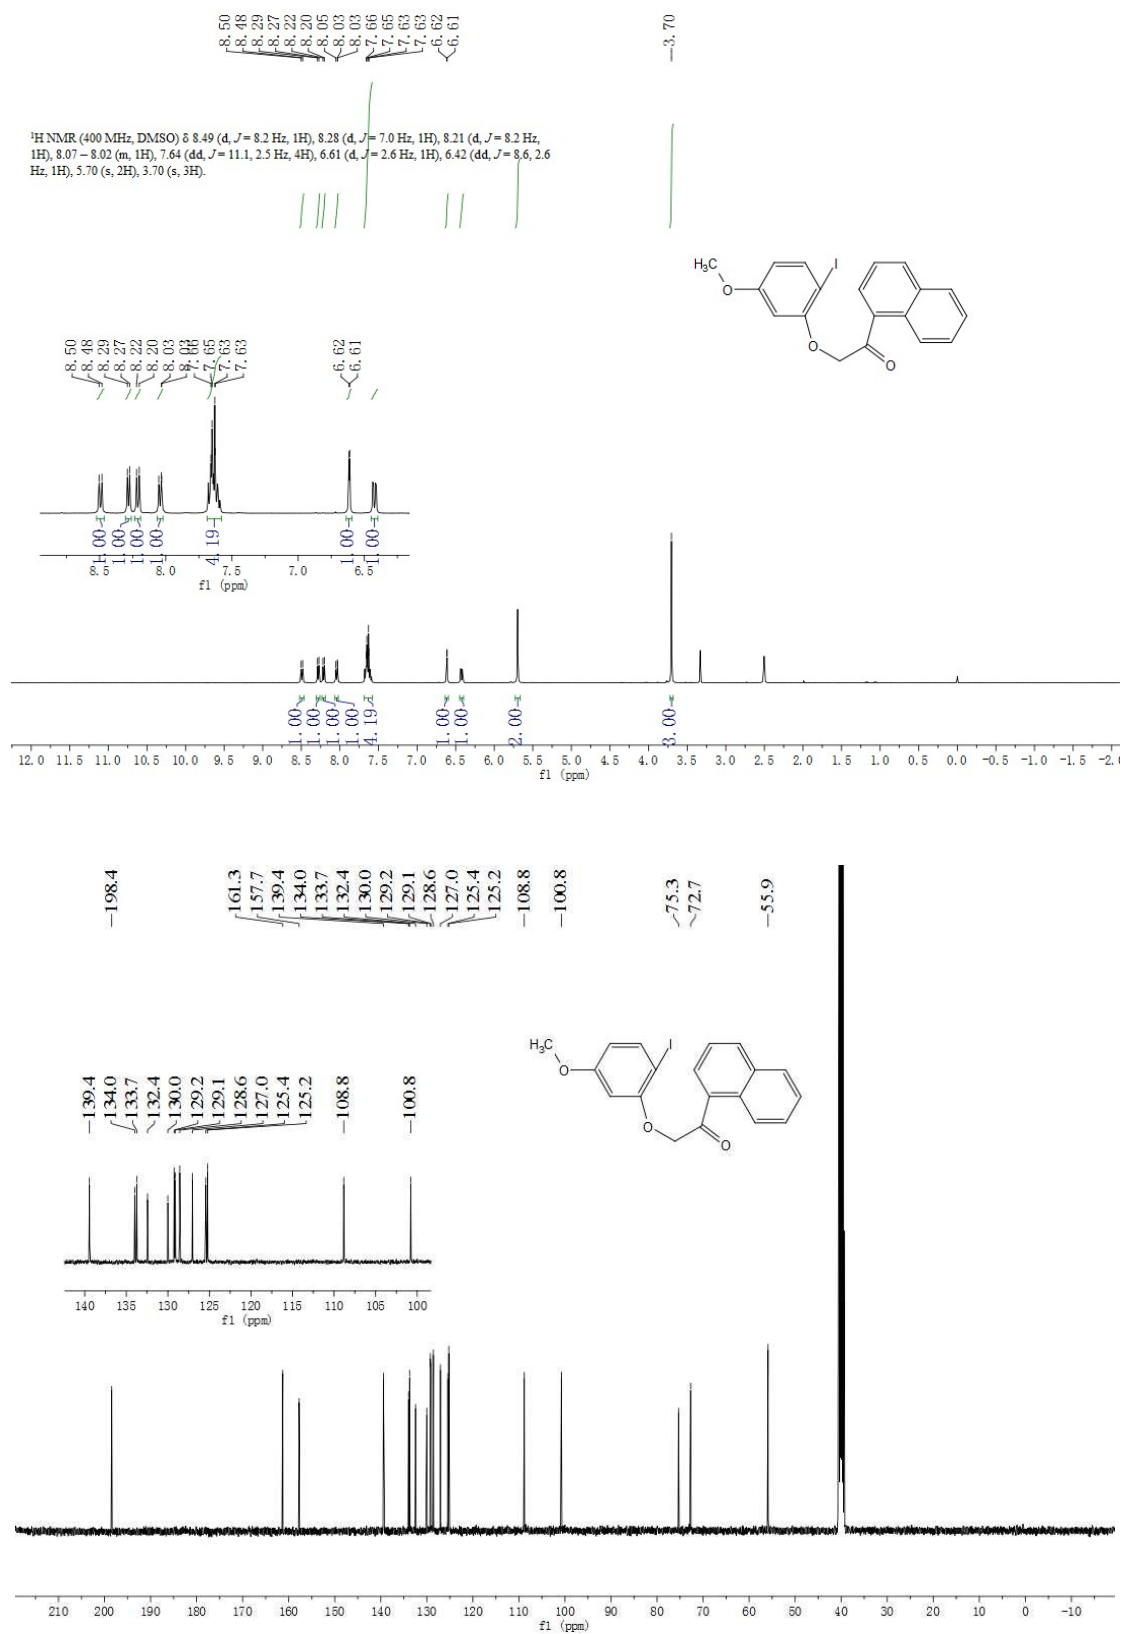

Fig. S29 NMR spectra of **3u**

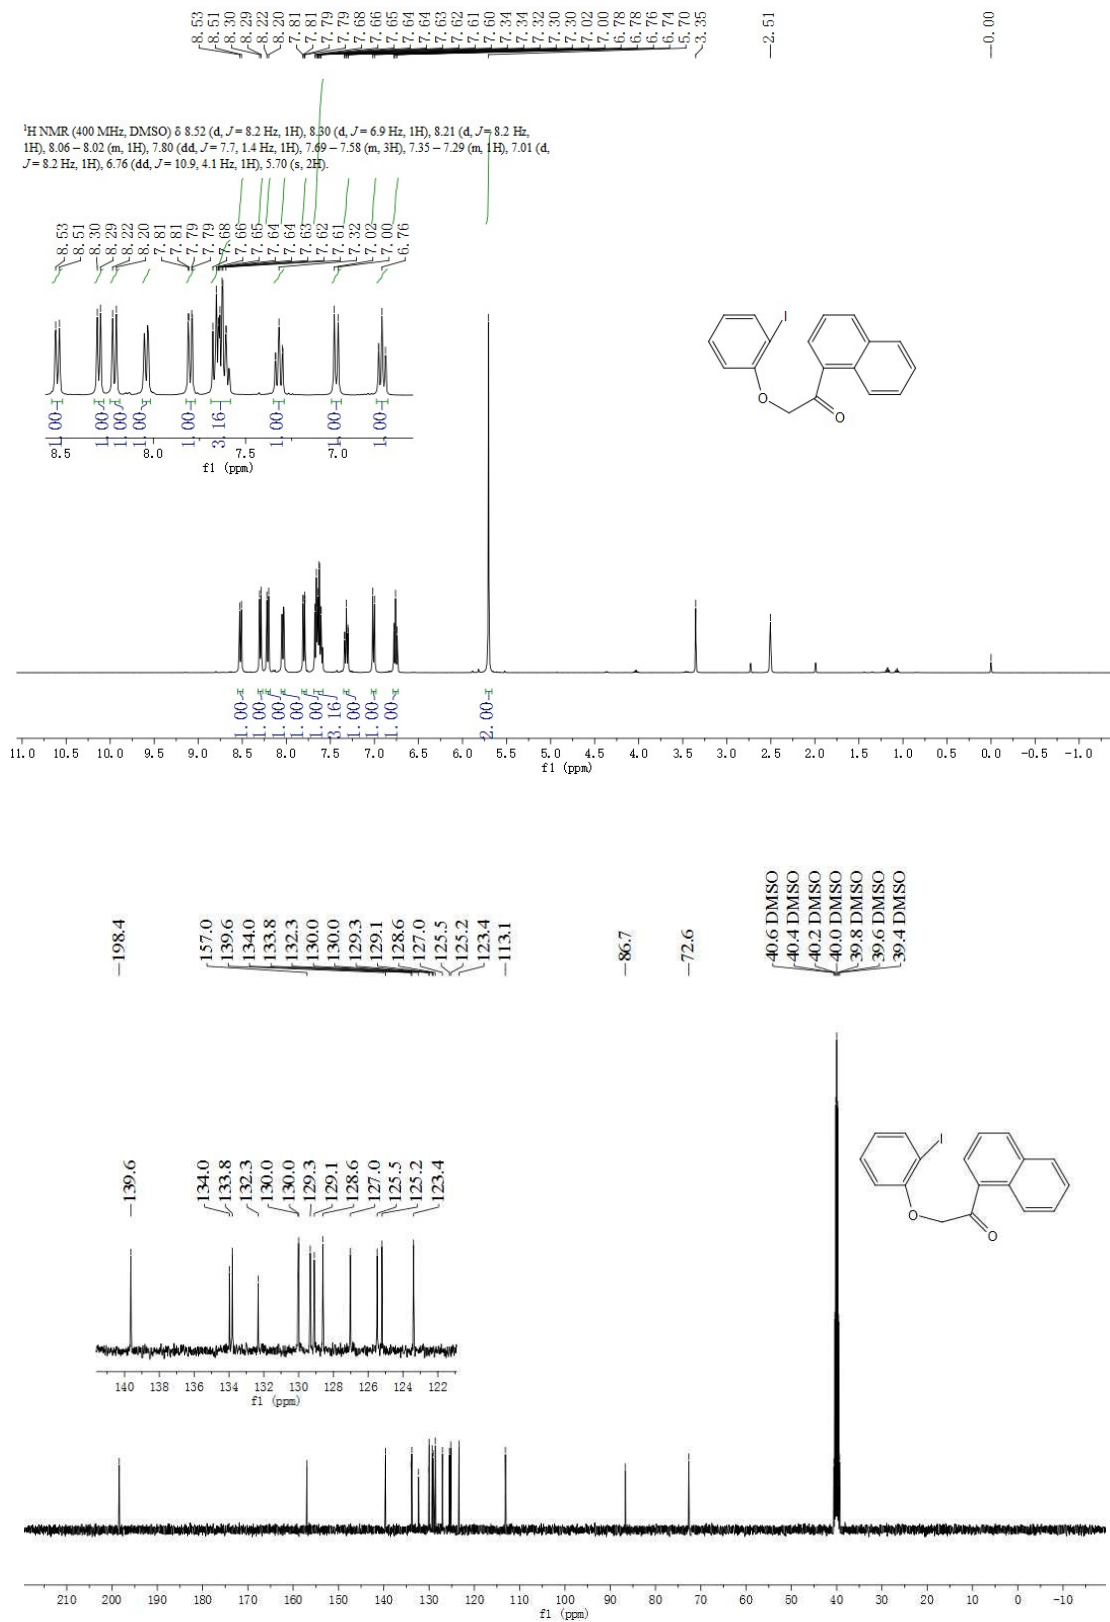

Fig. S30 NMR spectra of **3v**

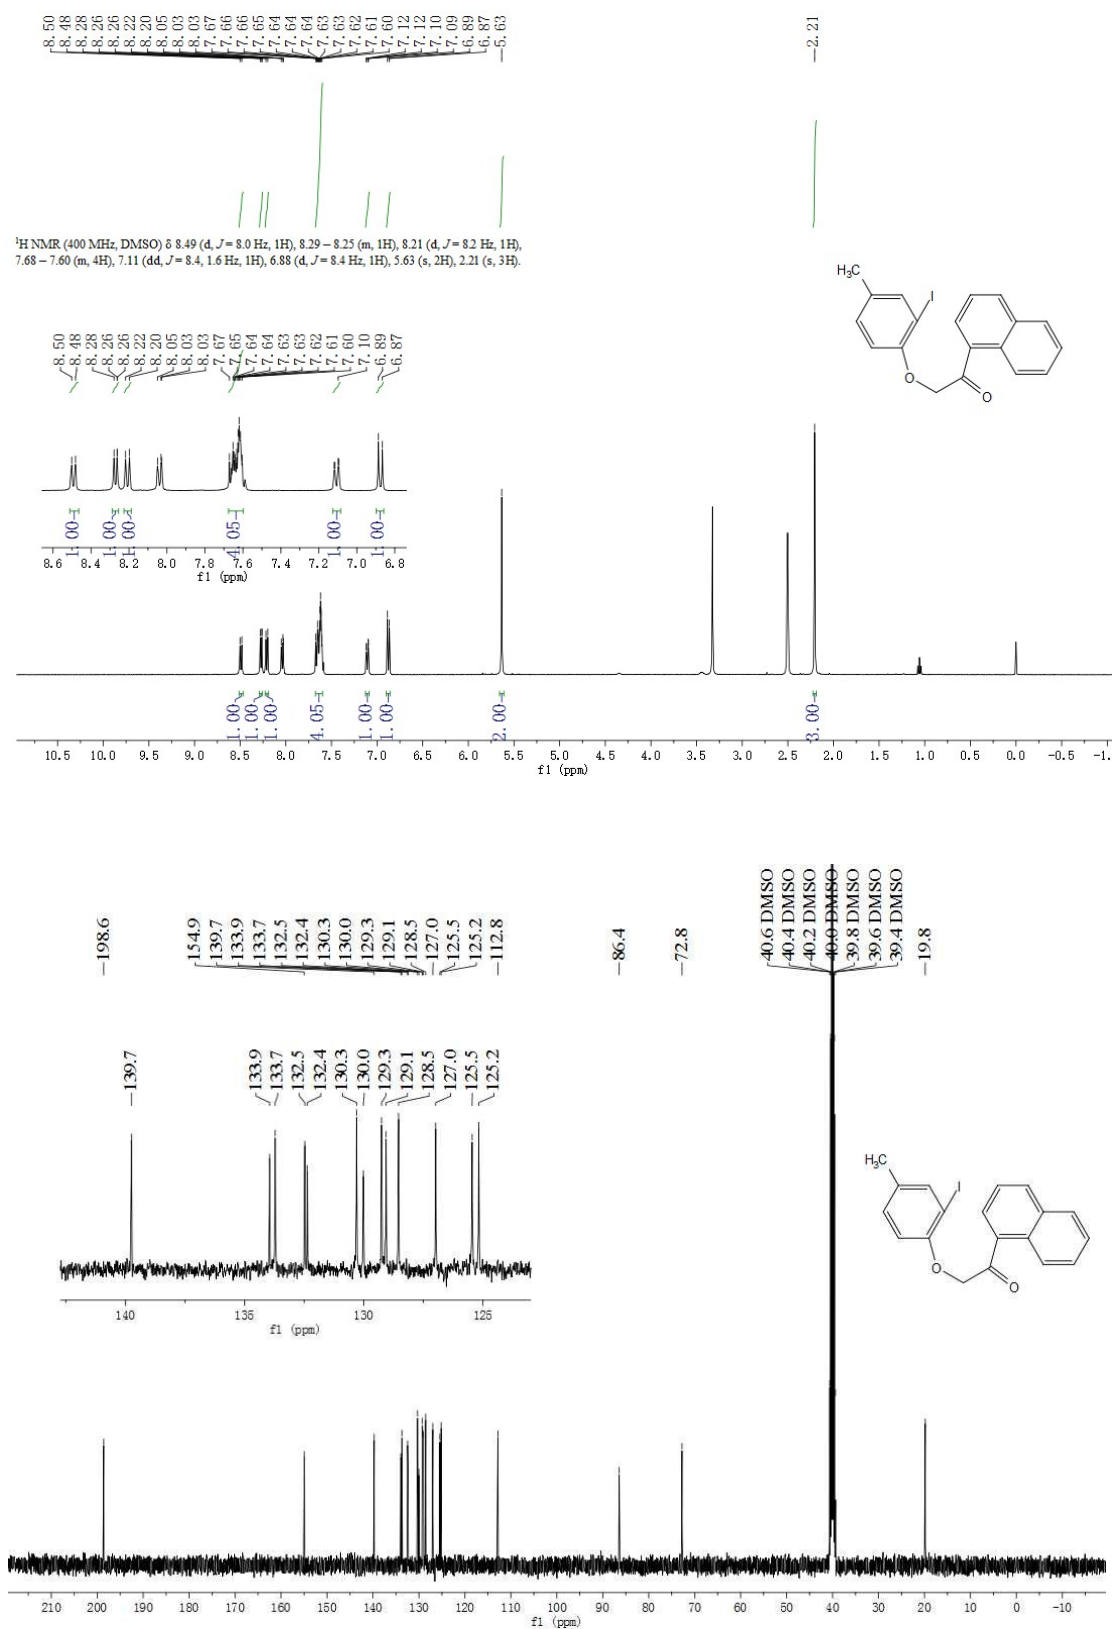

Fig. S31 NMR spectra of **3w**

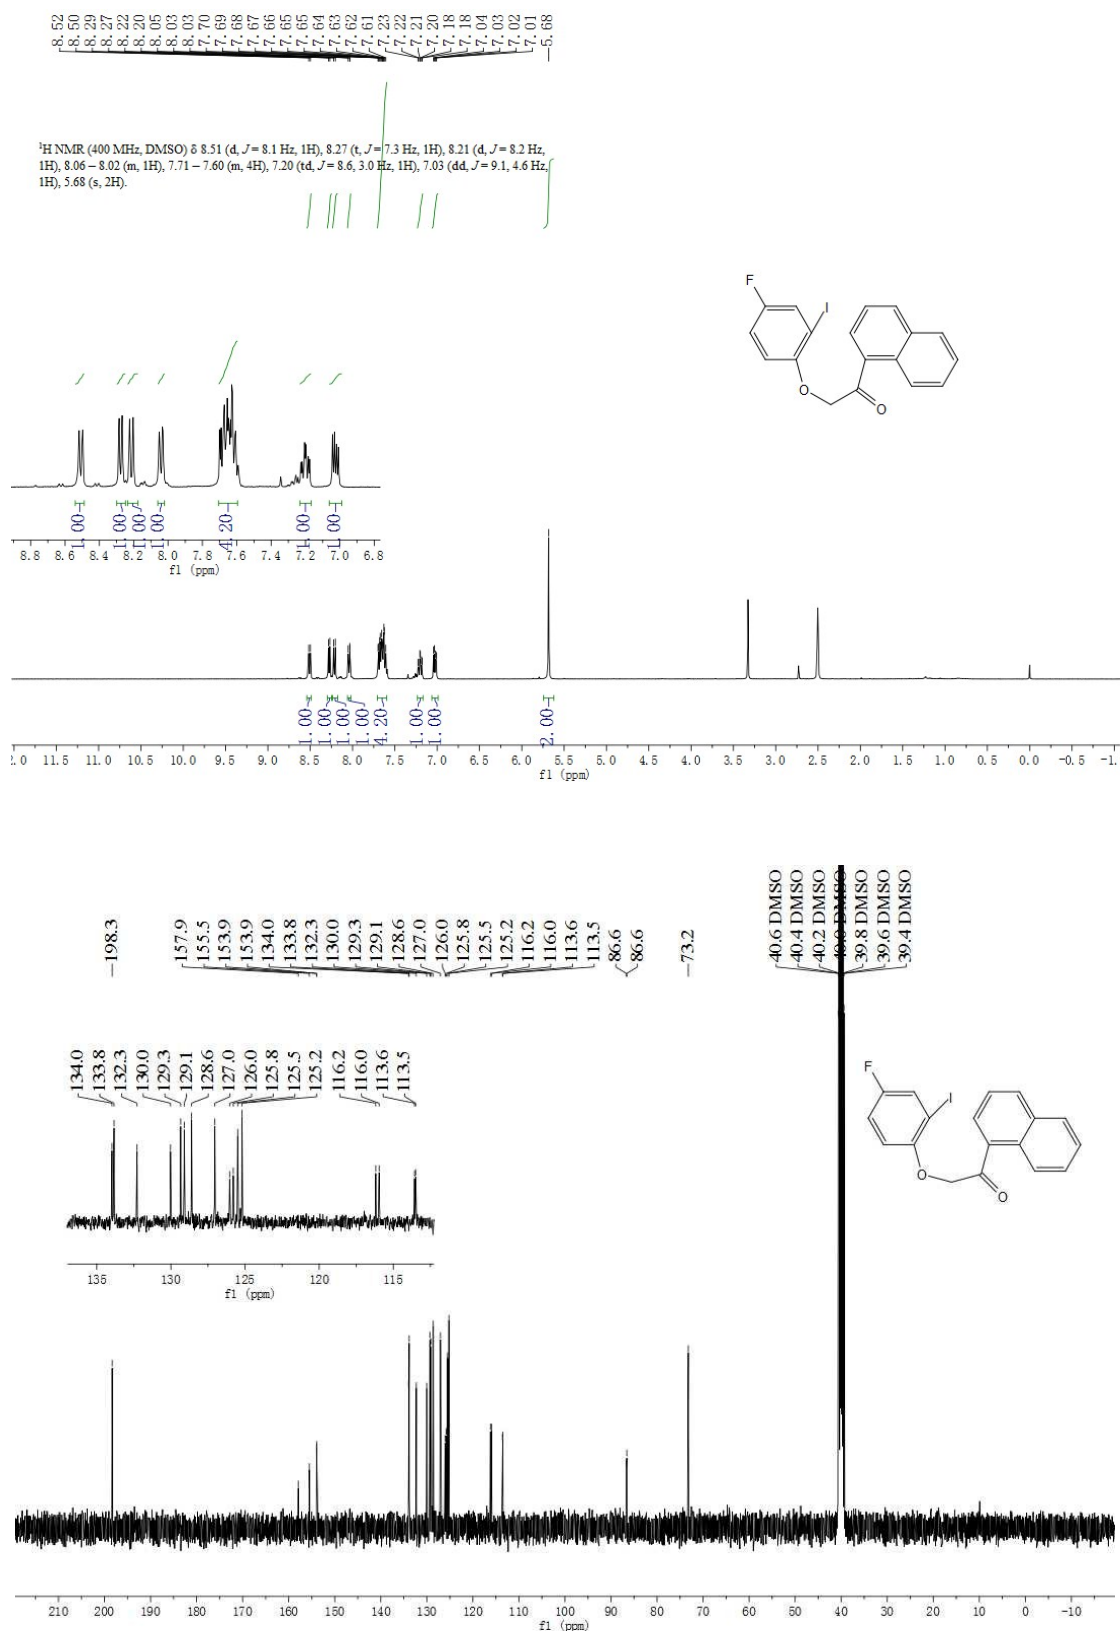

Fig. S32 NMR spectra of **3x**

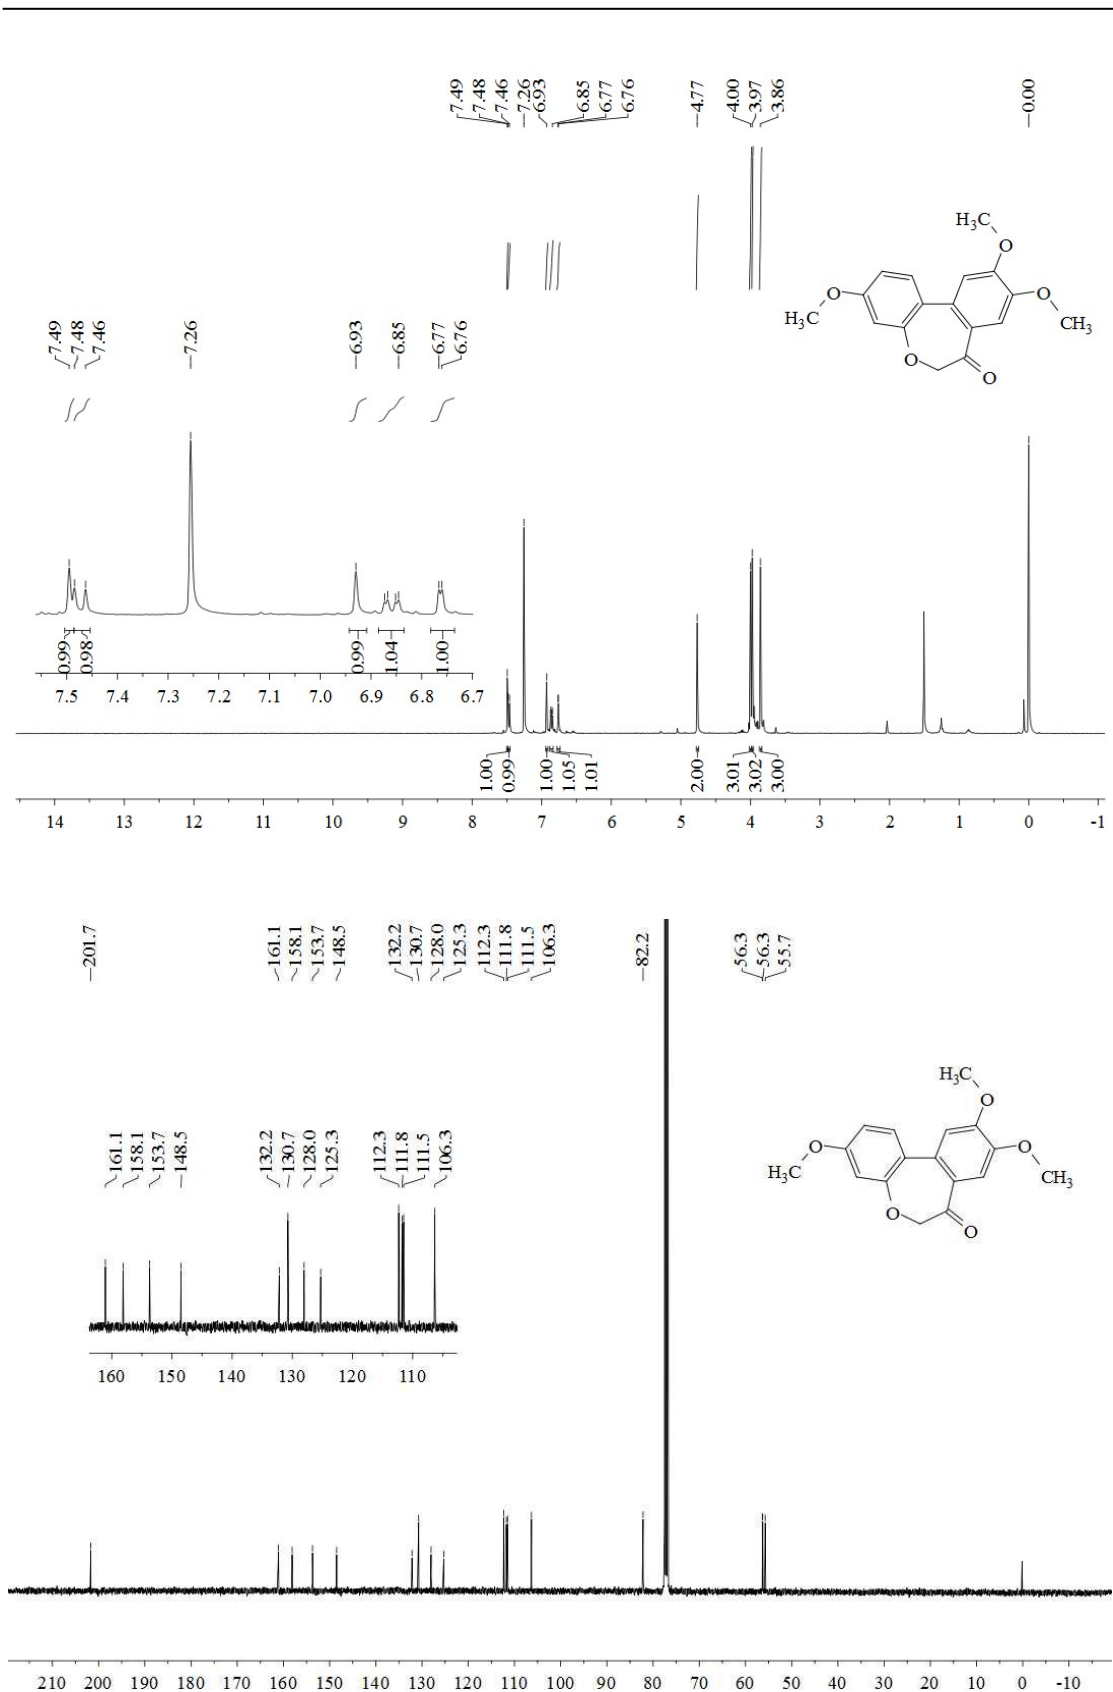

Fig. S33 NMR spectra of 4a

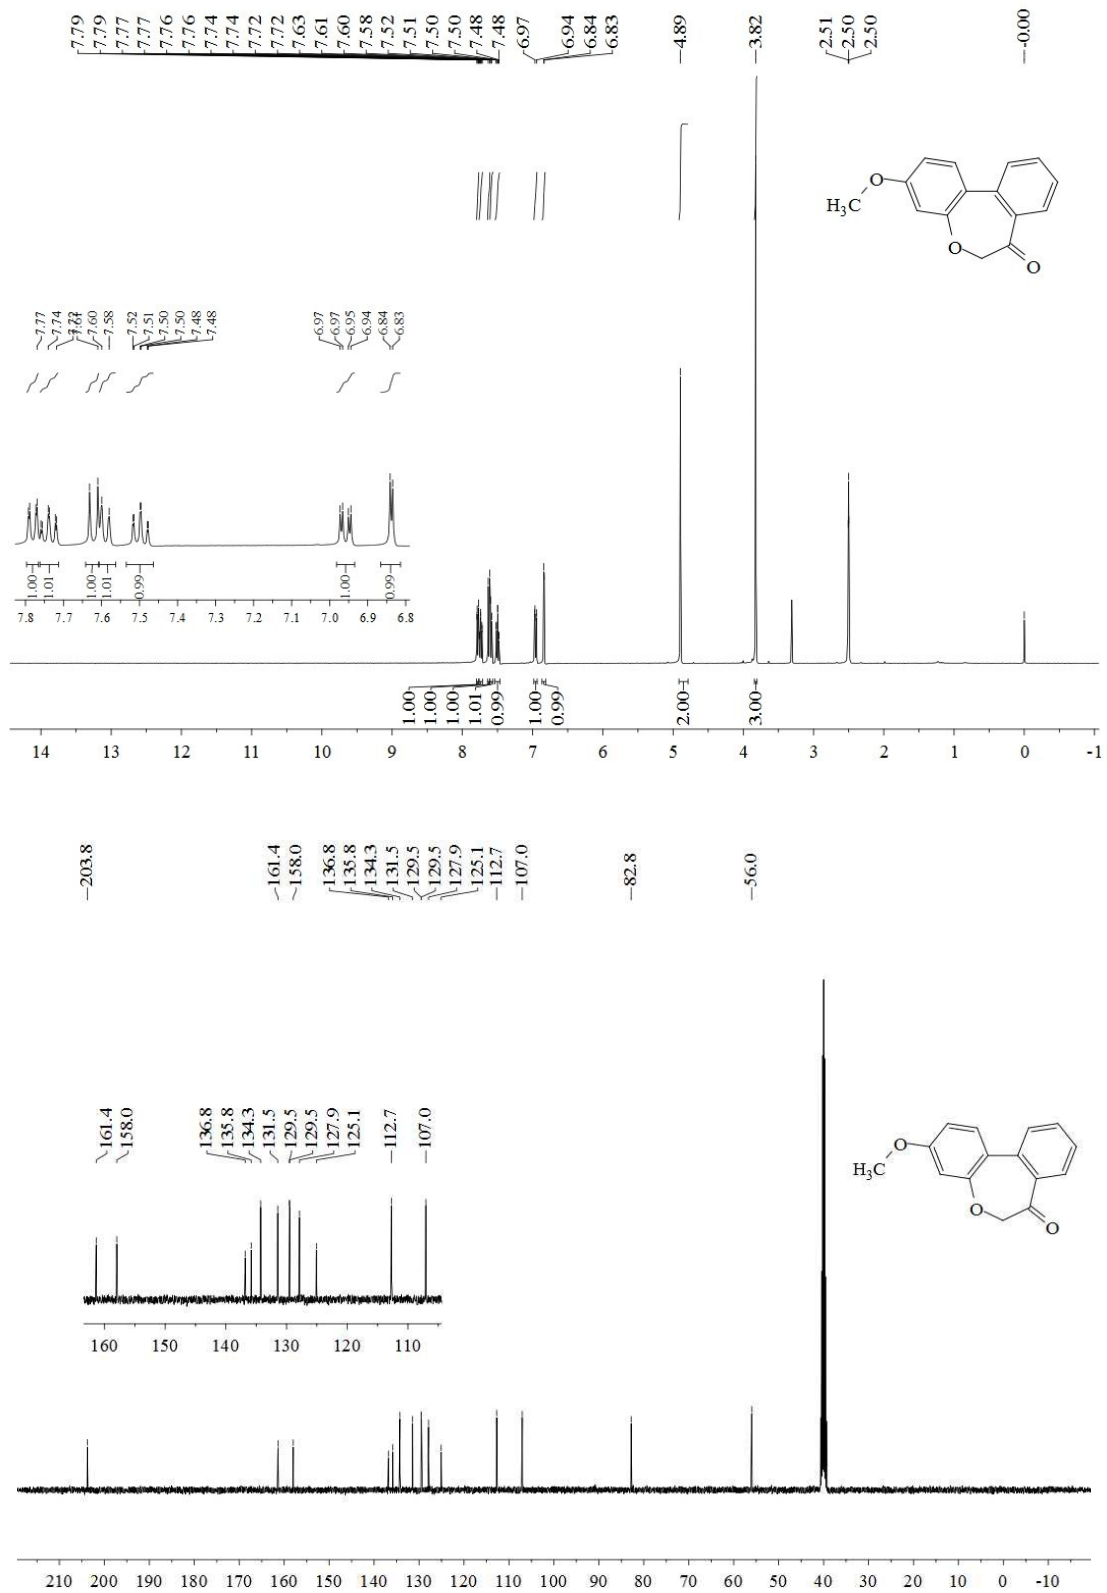

Fig. S34 NMR spectra of **4b**



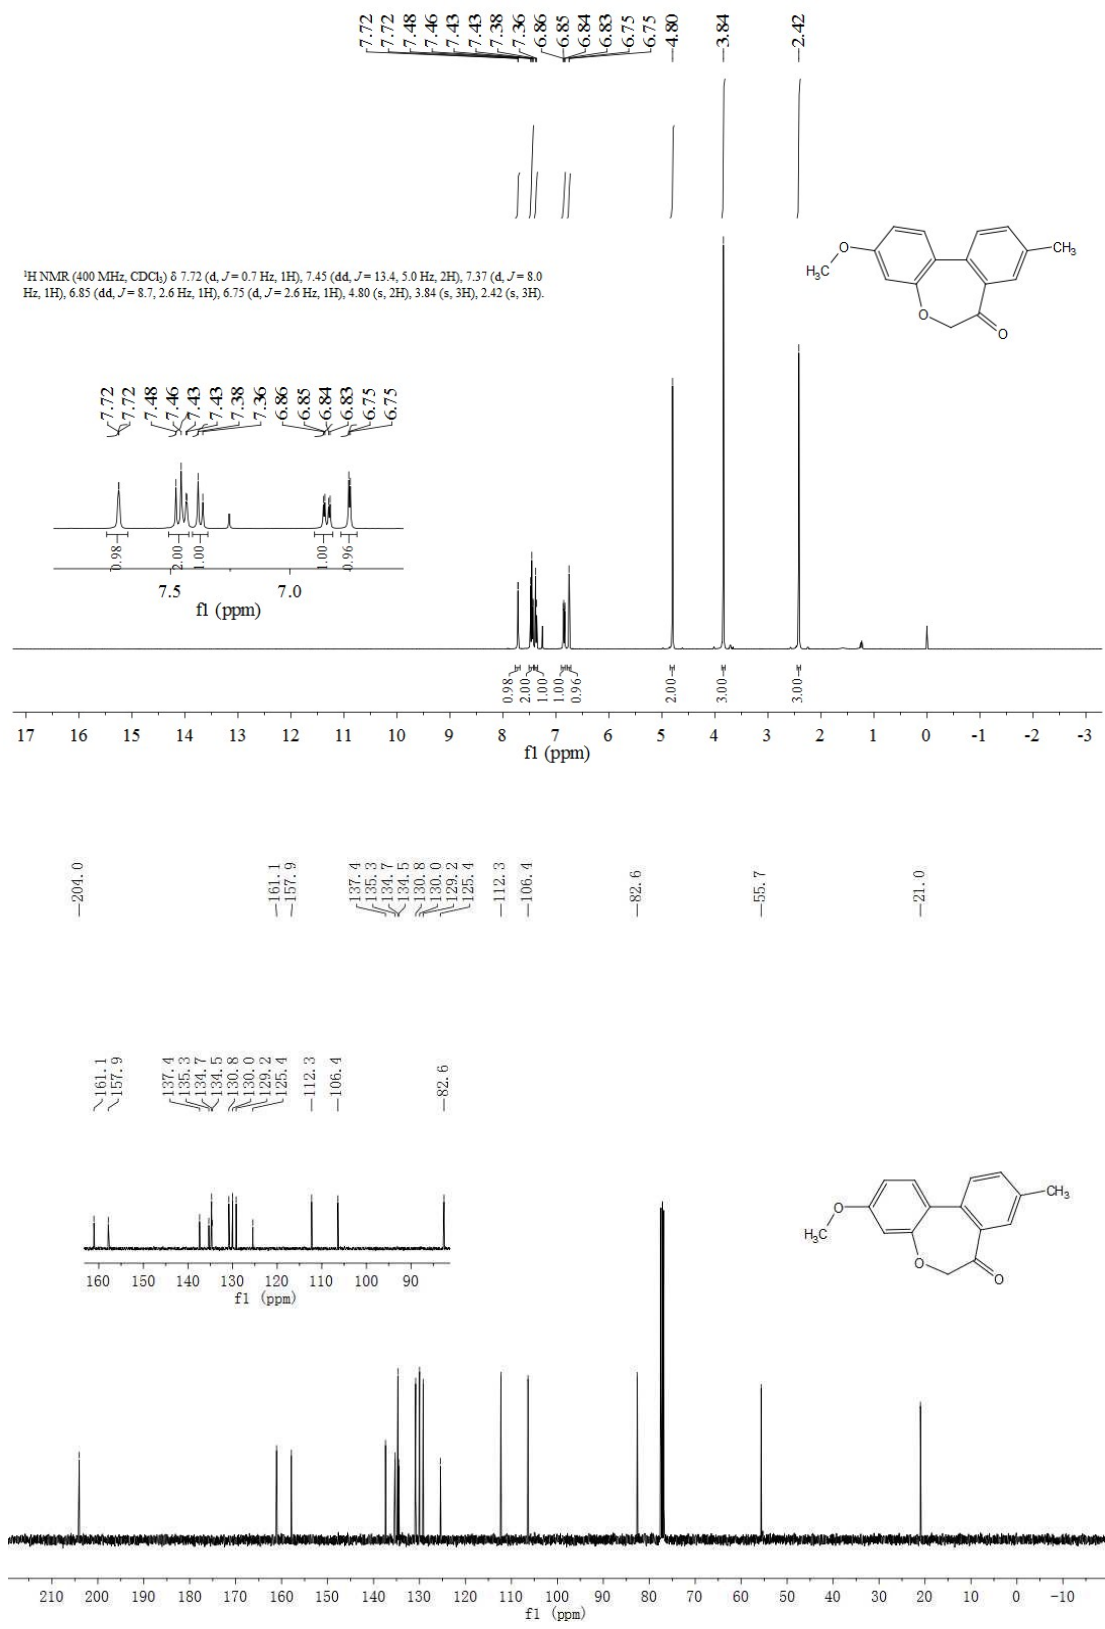

Fig. S35 NMR spectra of **4c**

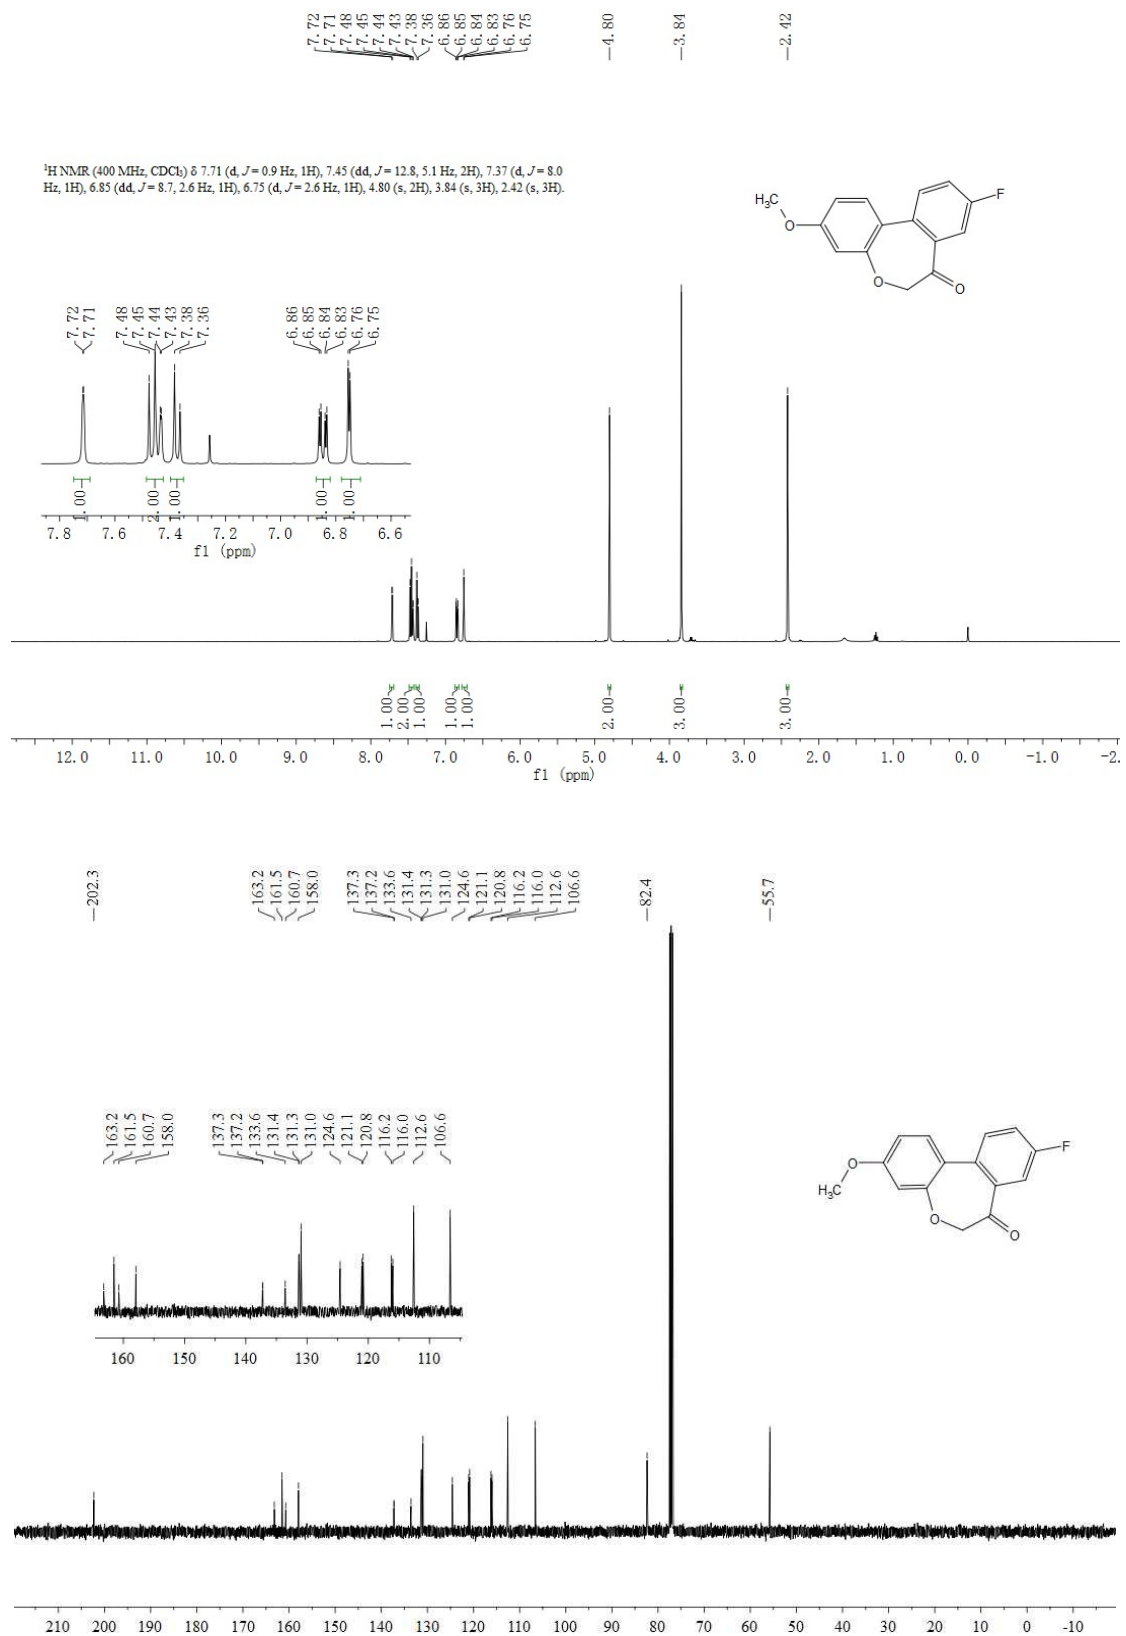

Fig. S36 NMR spectra of **4d**

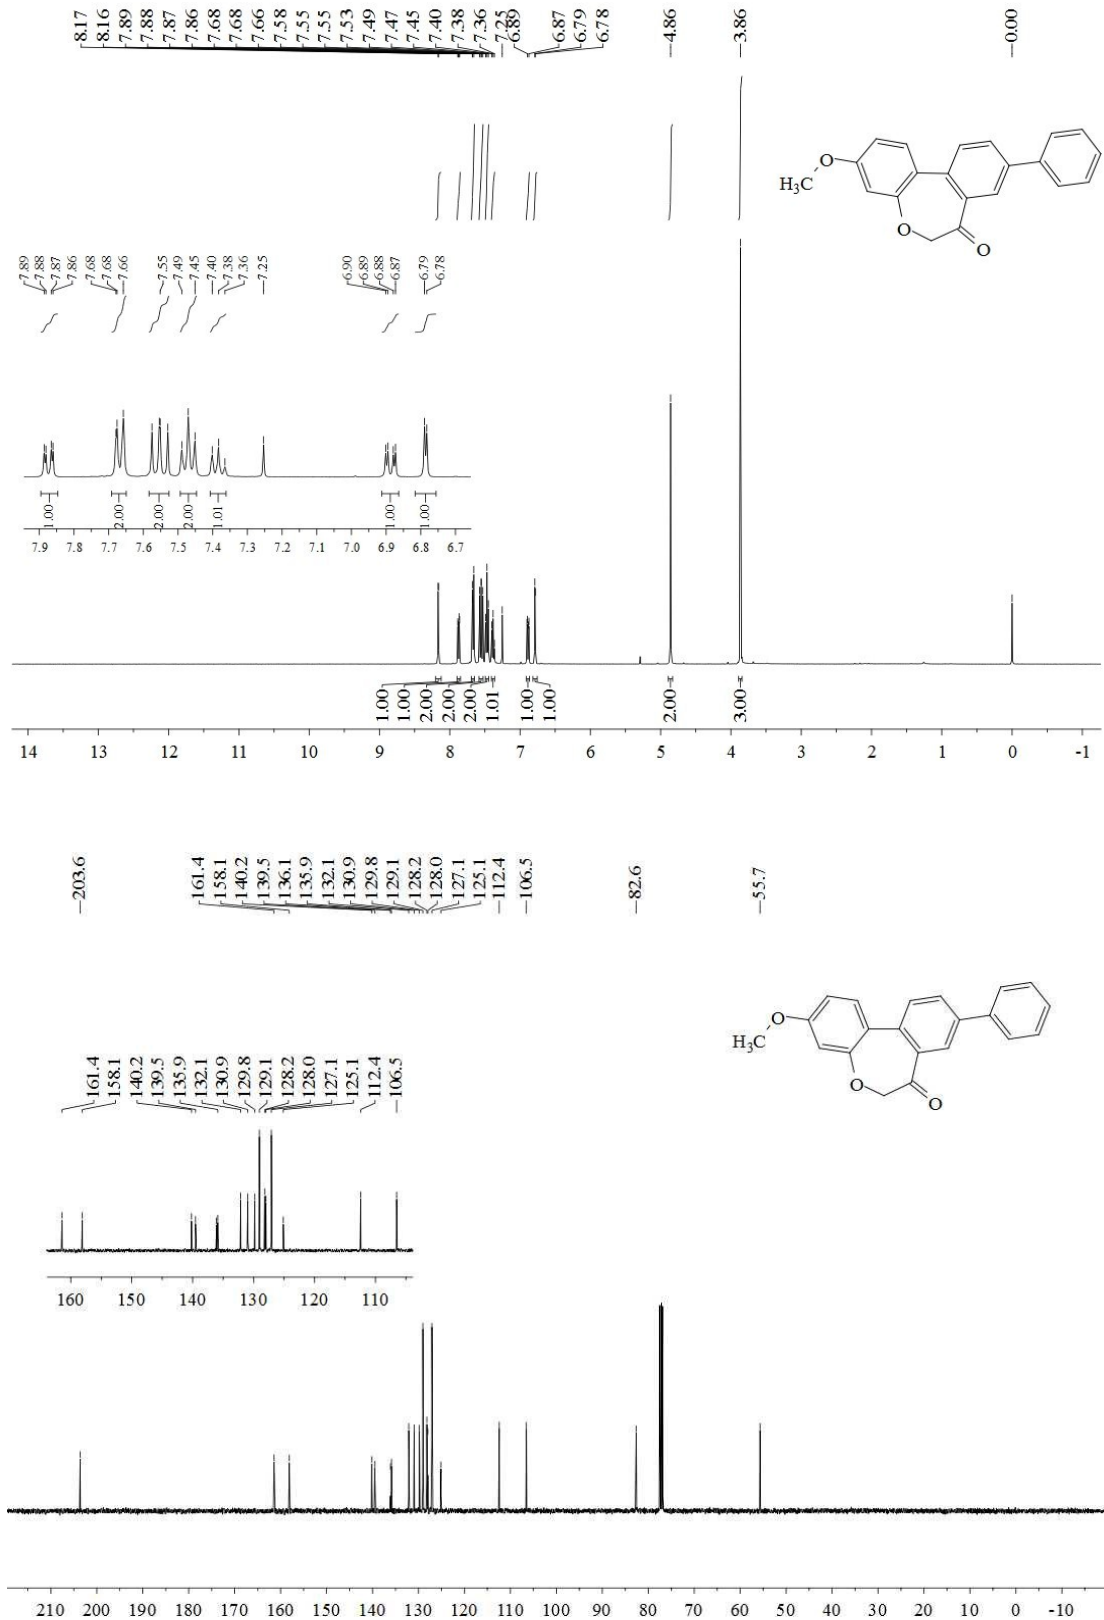

Fig. S37 NMR spectra of 4e

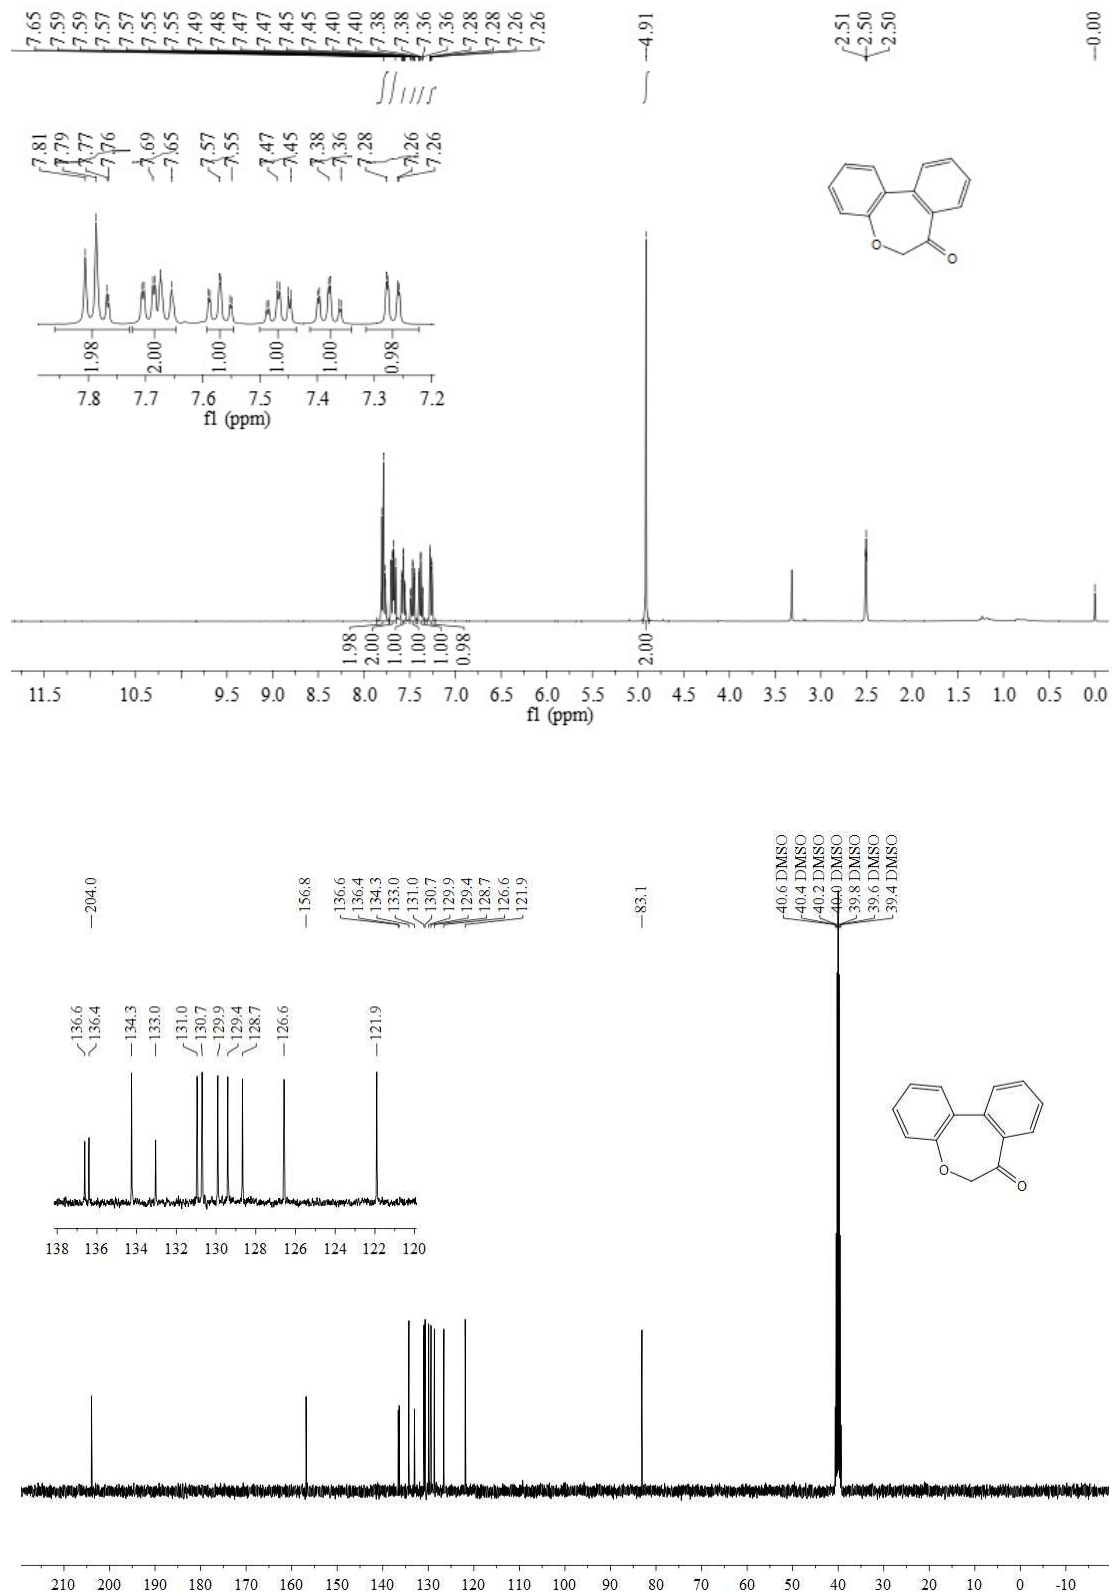

Fig. S38 NMR spectra of 4f

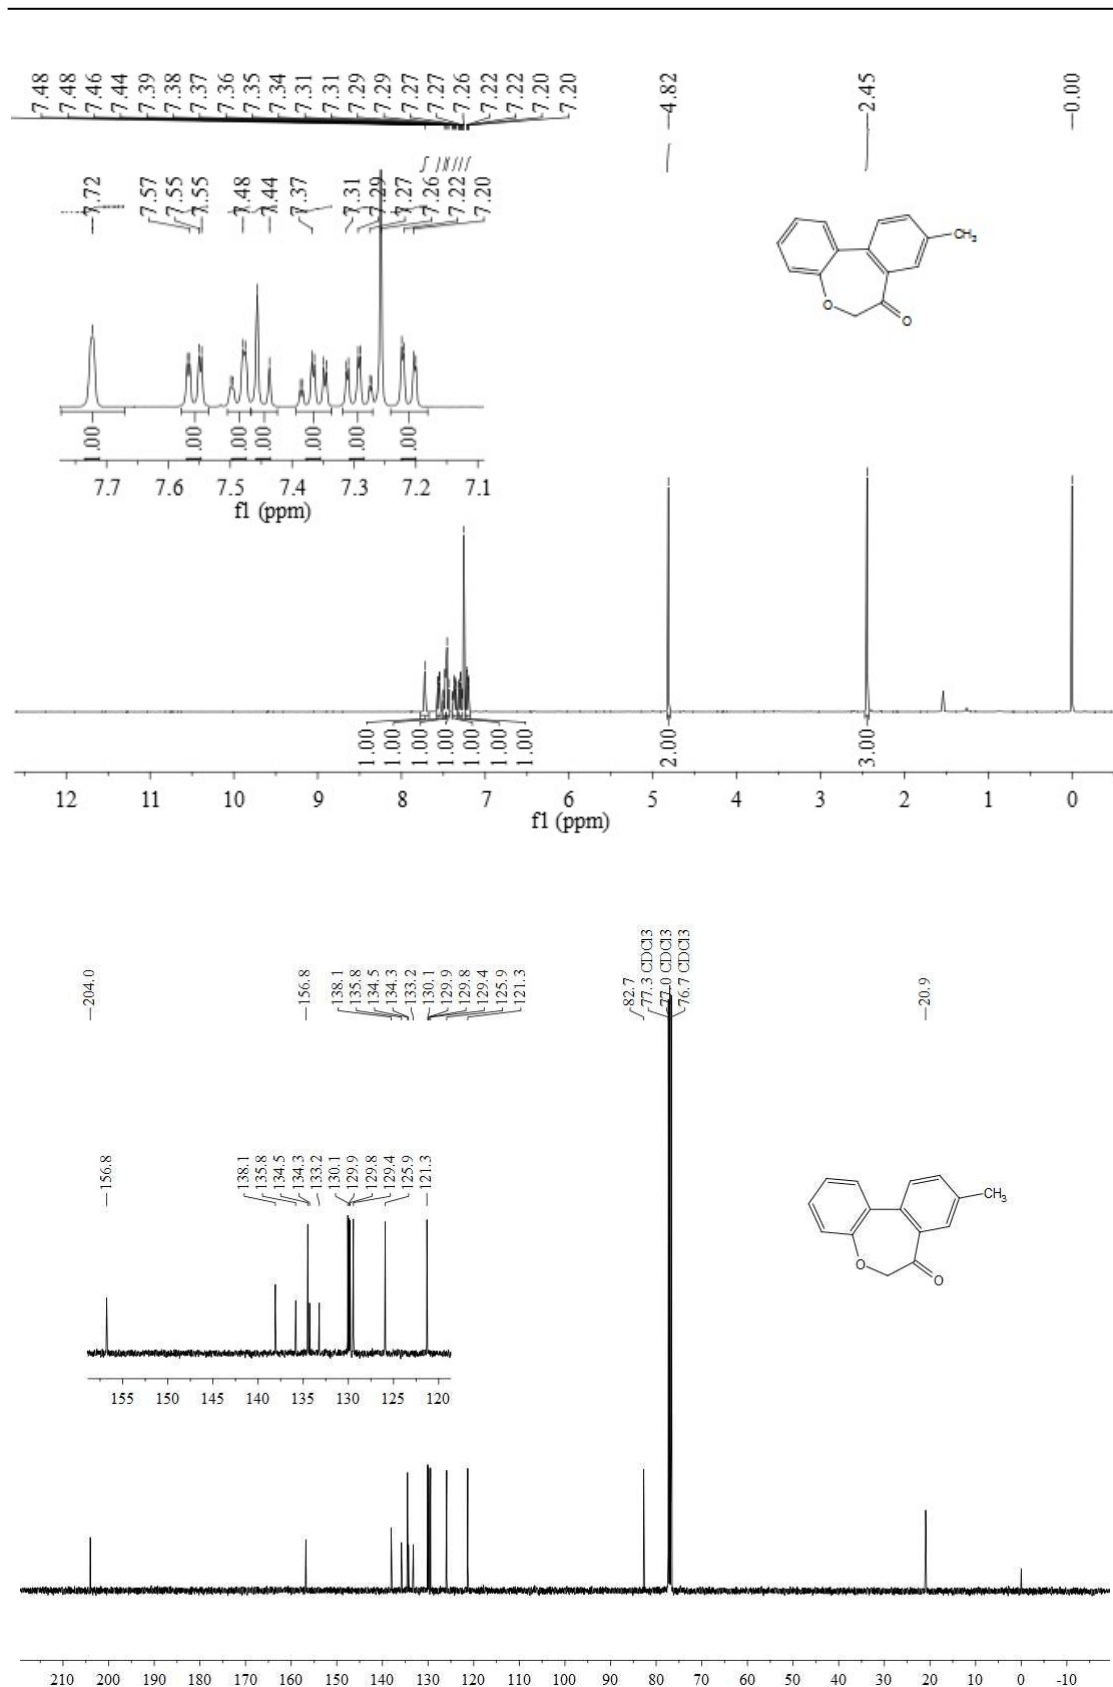

Fig. S39 NMR spectra of **4g**

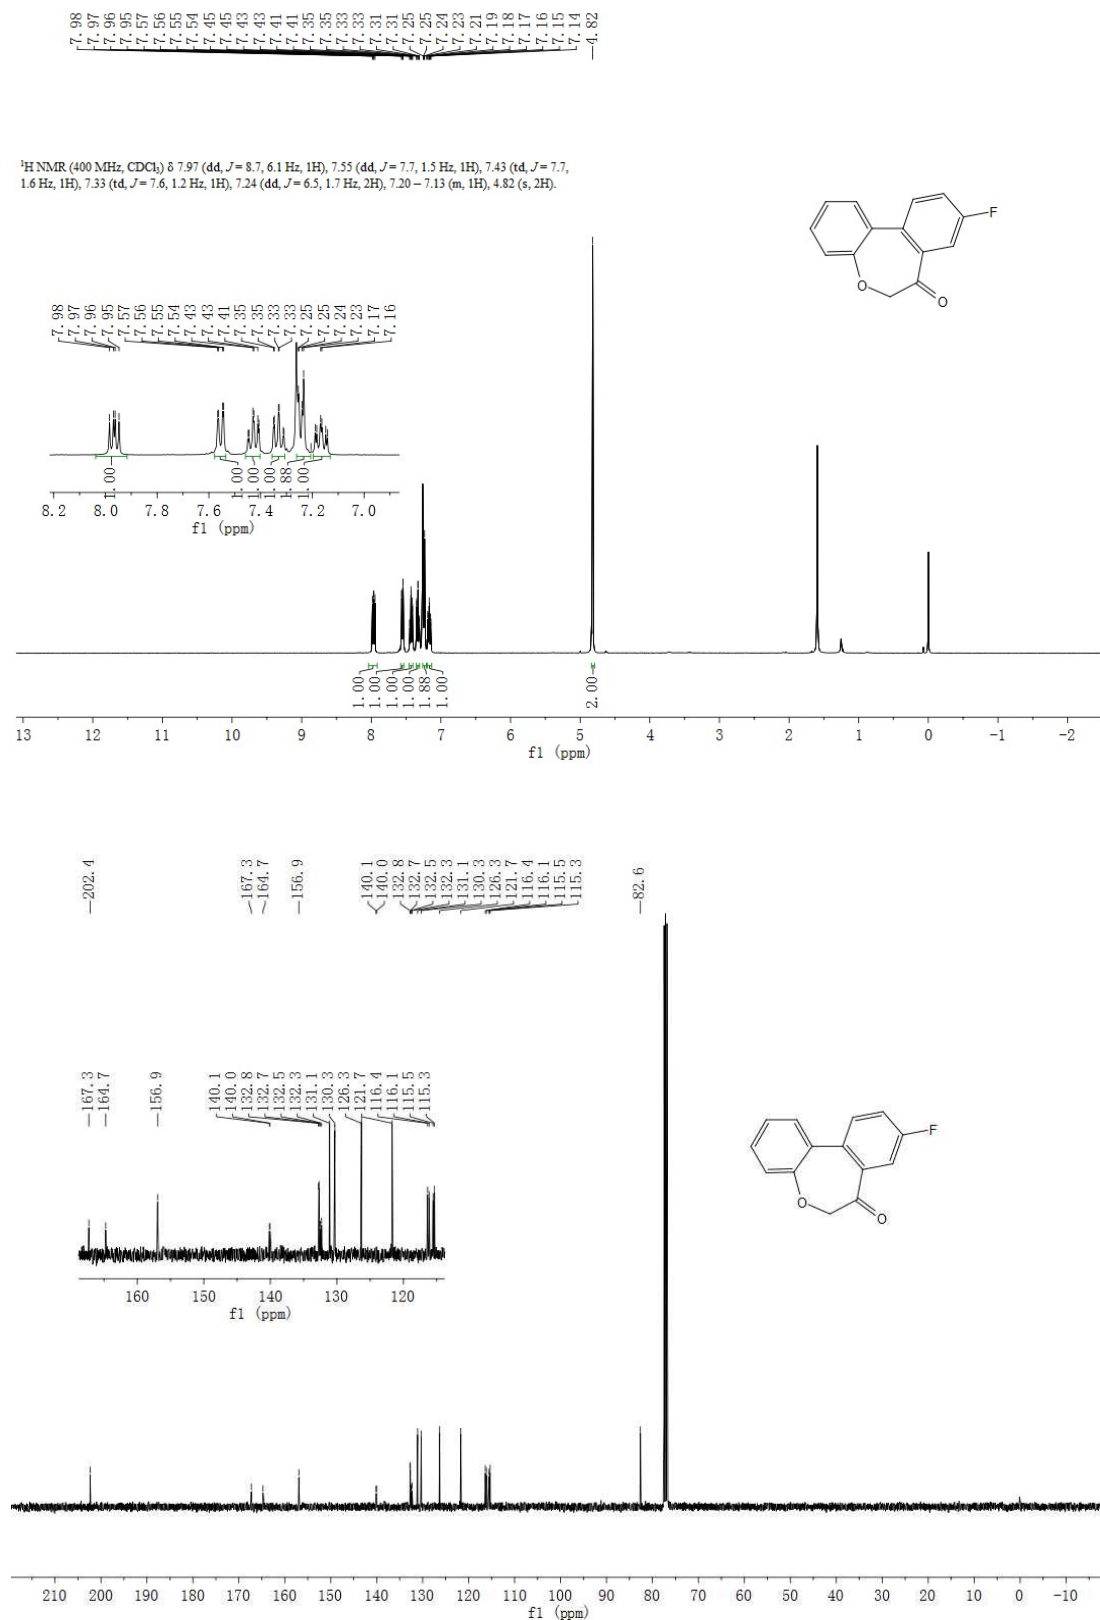

Fig. S40 NMR spectra of **4h**

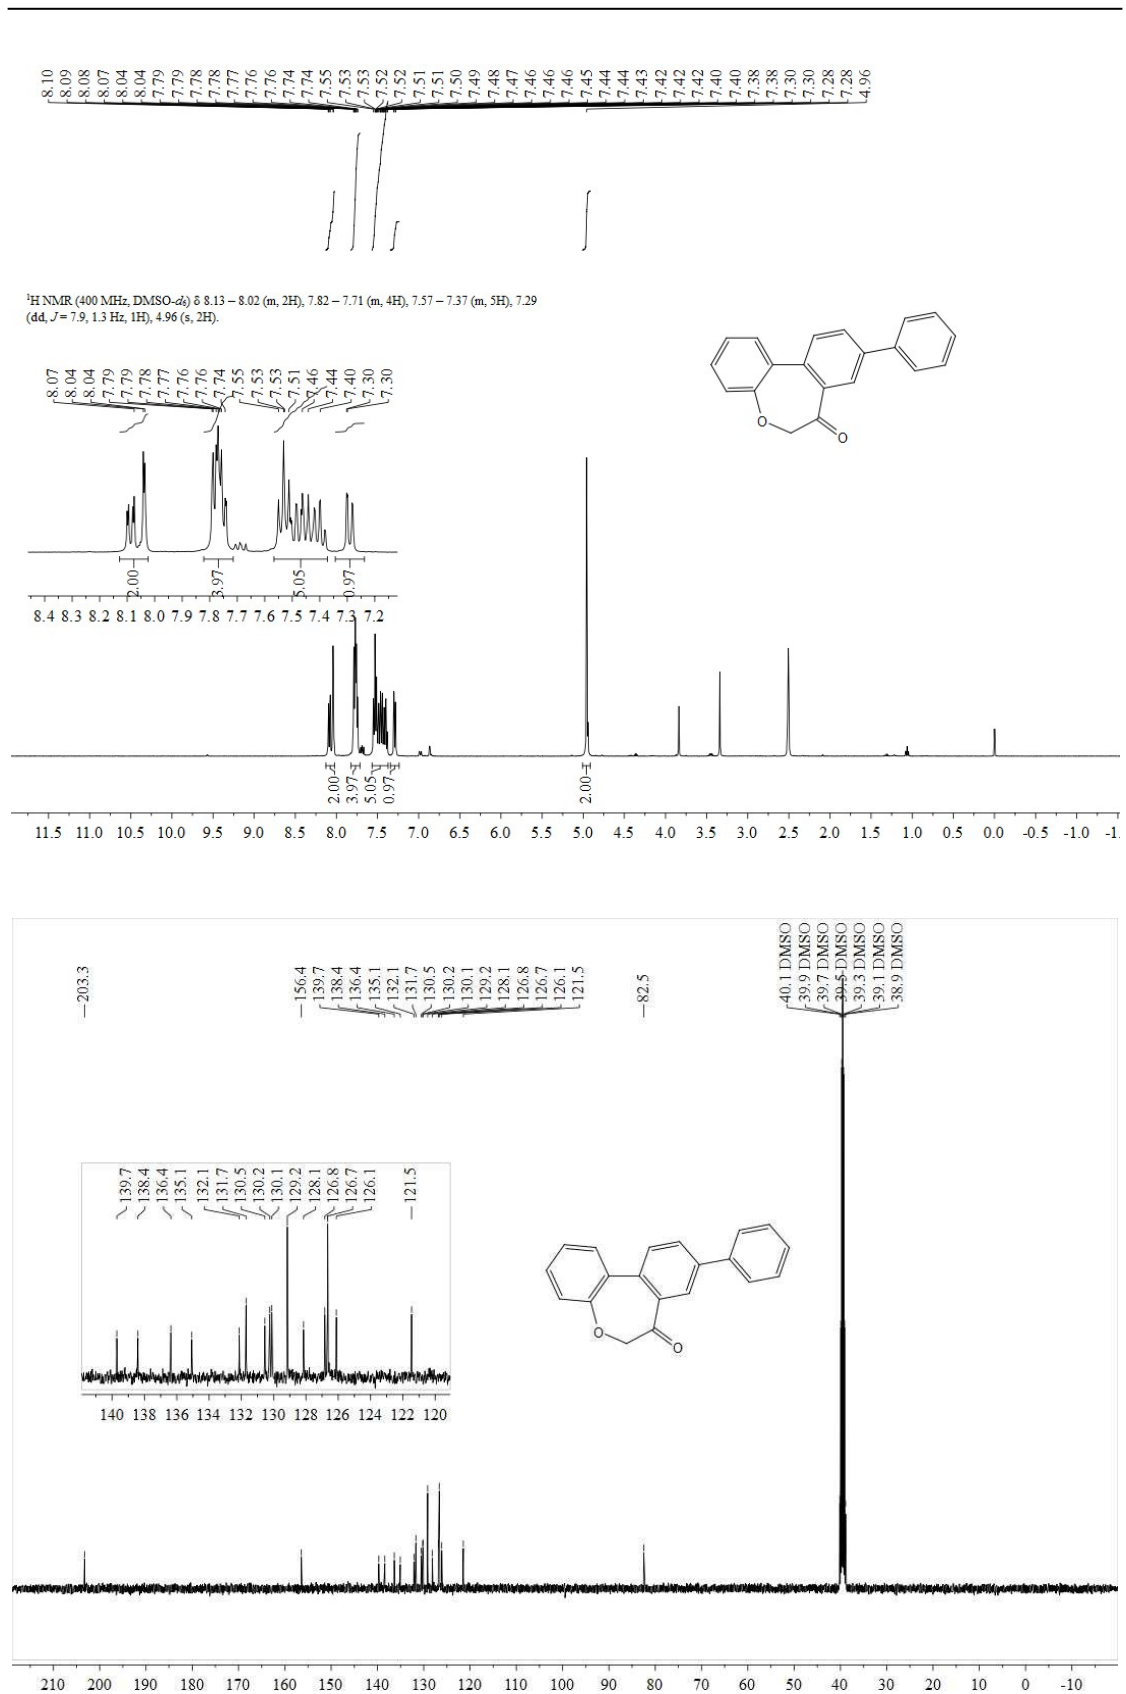

Fig. S41 NMR spectra of **4i**

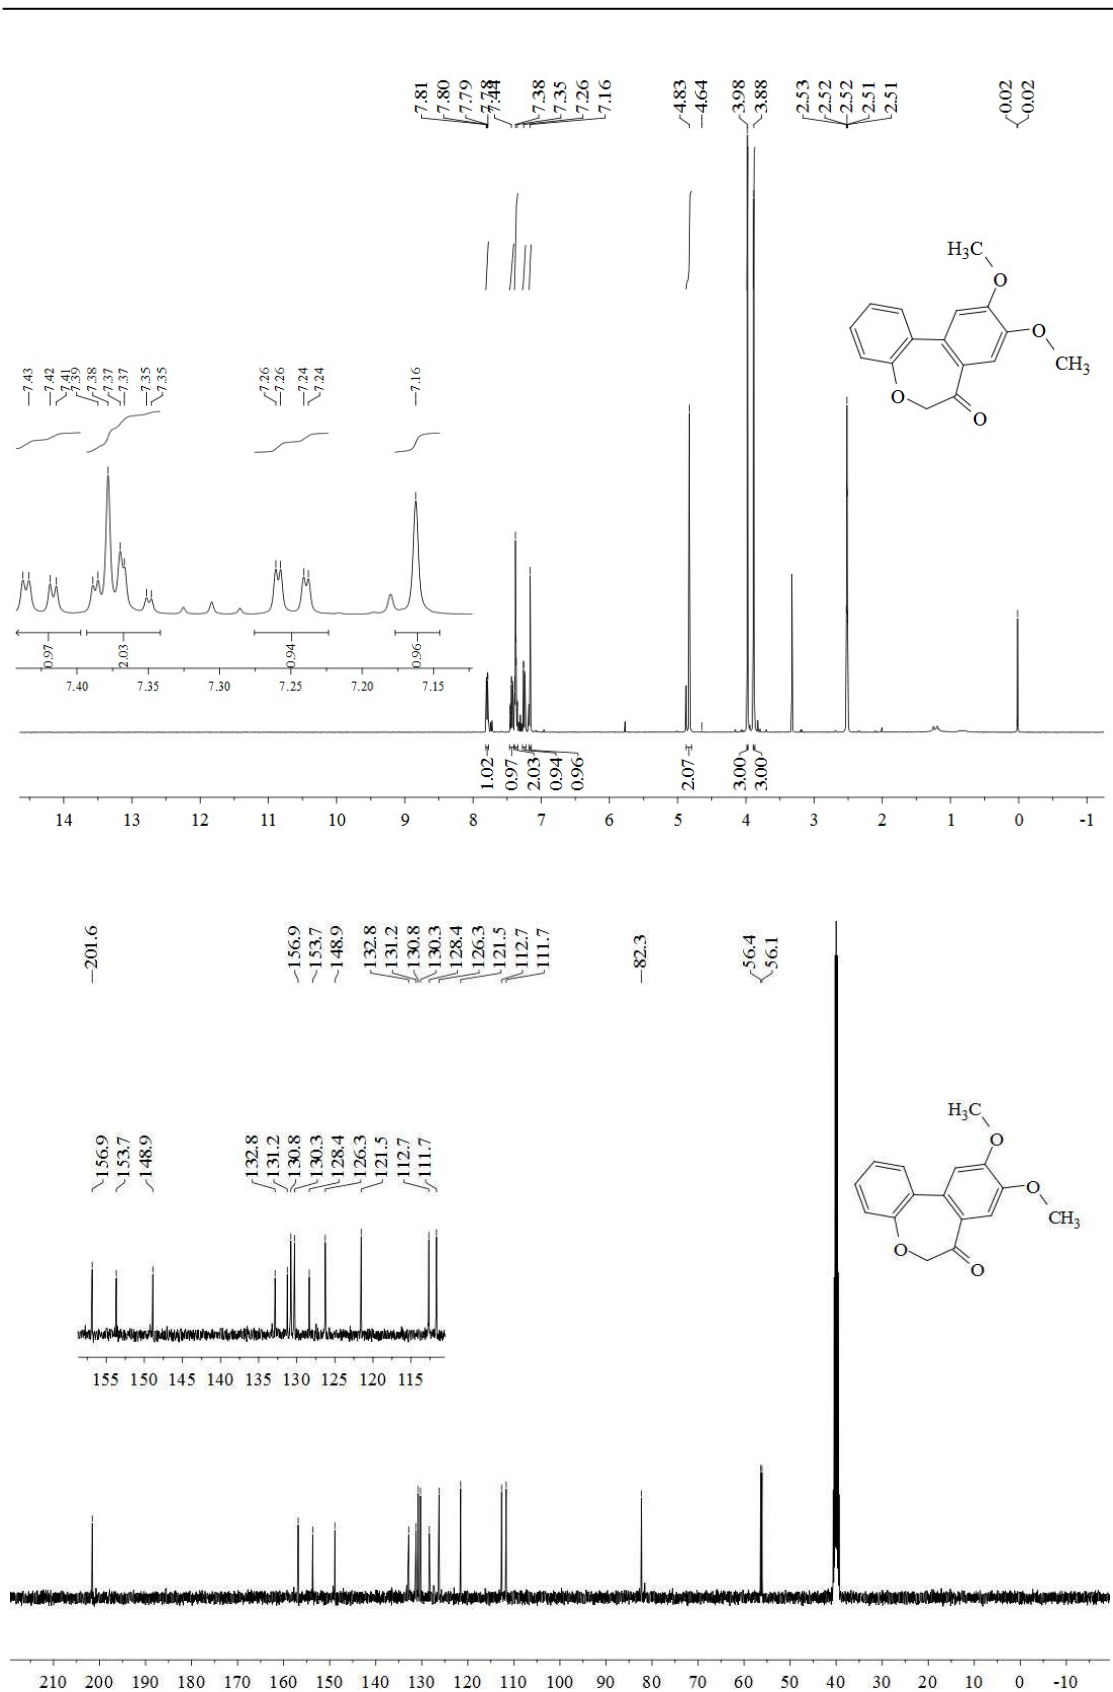

Fig. S42 NMR spectra of **4j**



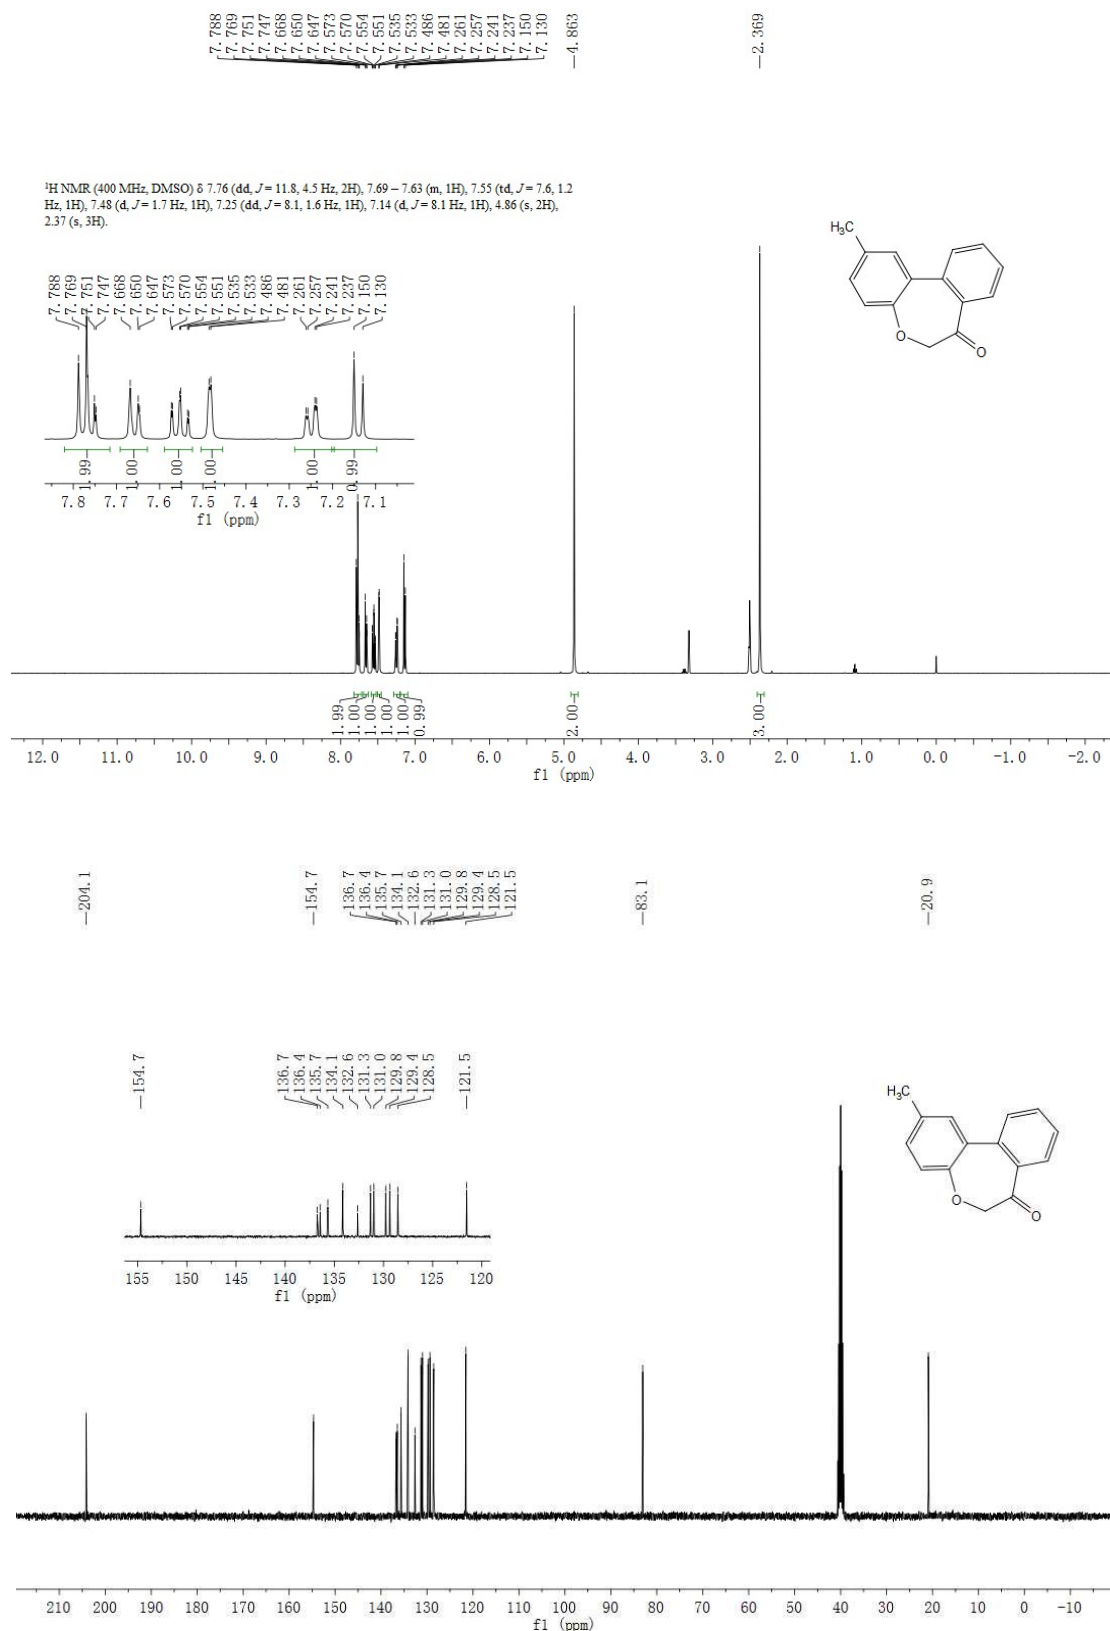

Fig. S43 NMR spectra of 4k

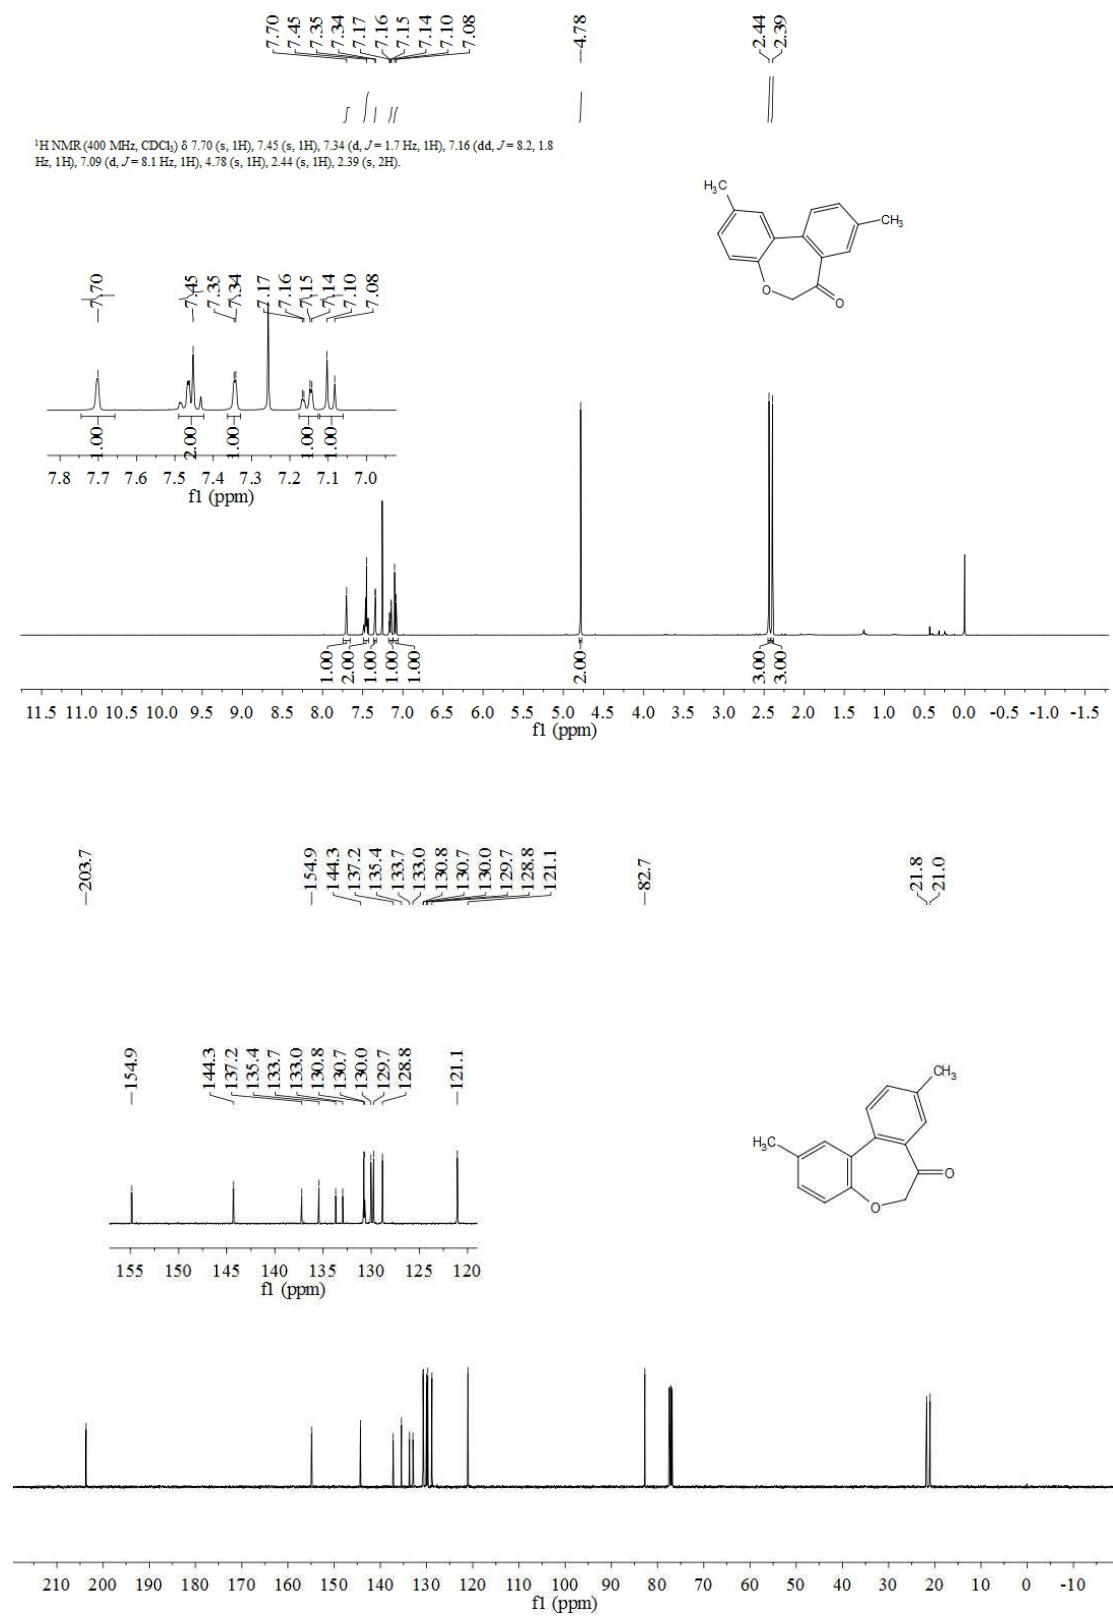

Fig. S44 NMR spectra of 41

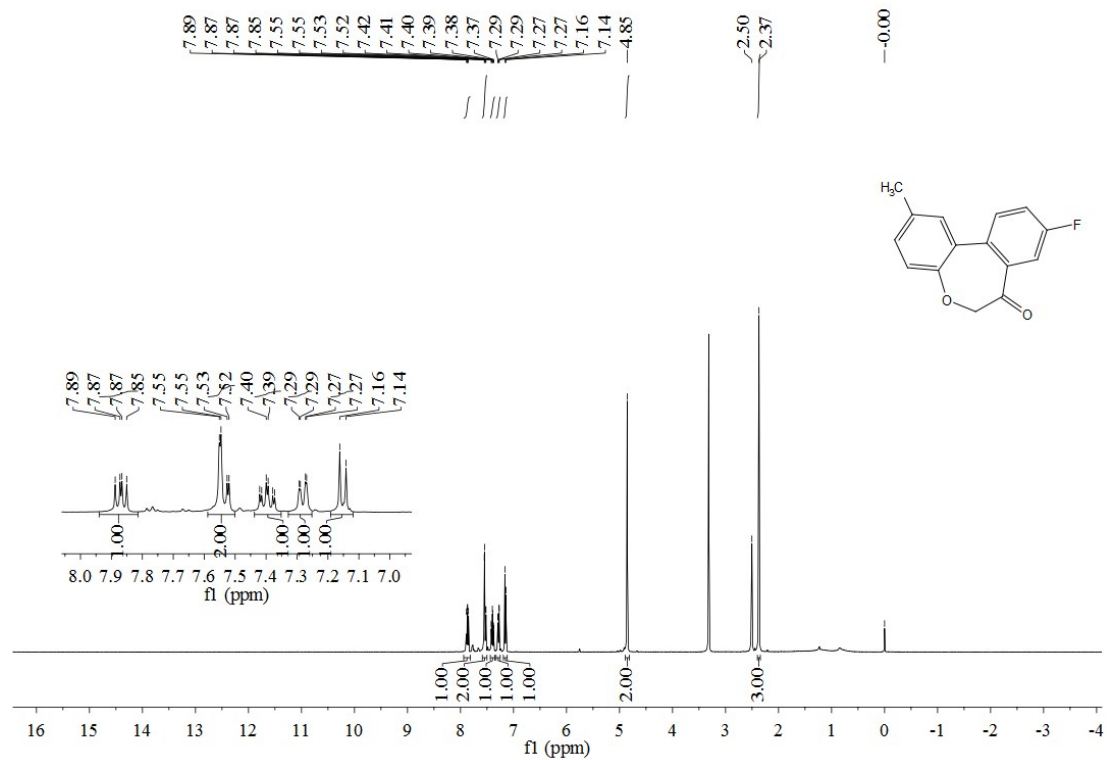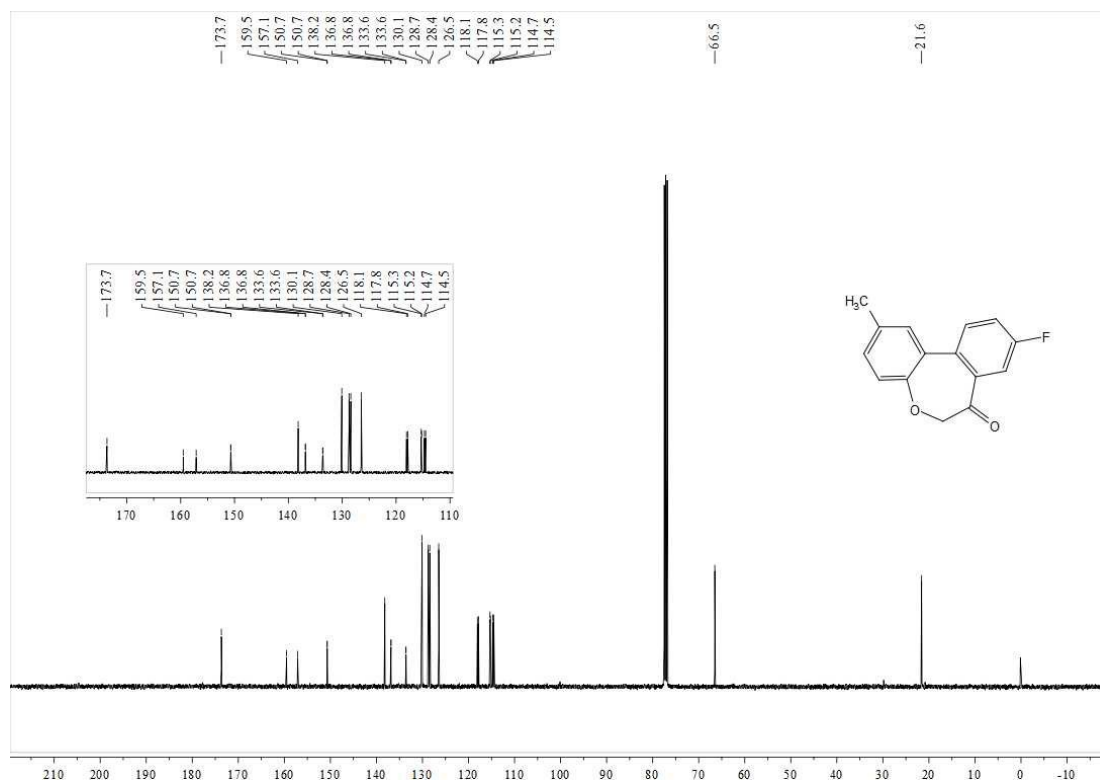

Fig. S45 NMR spectra of 4m

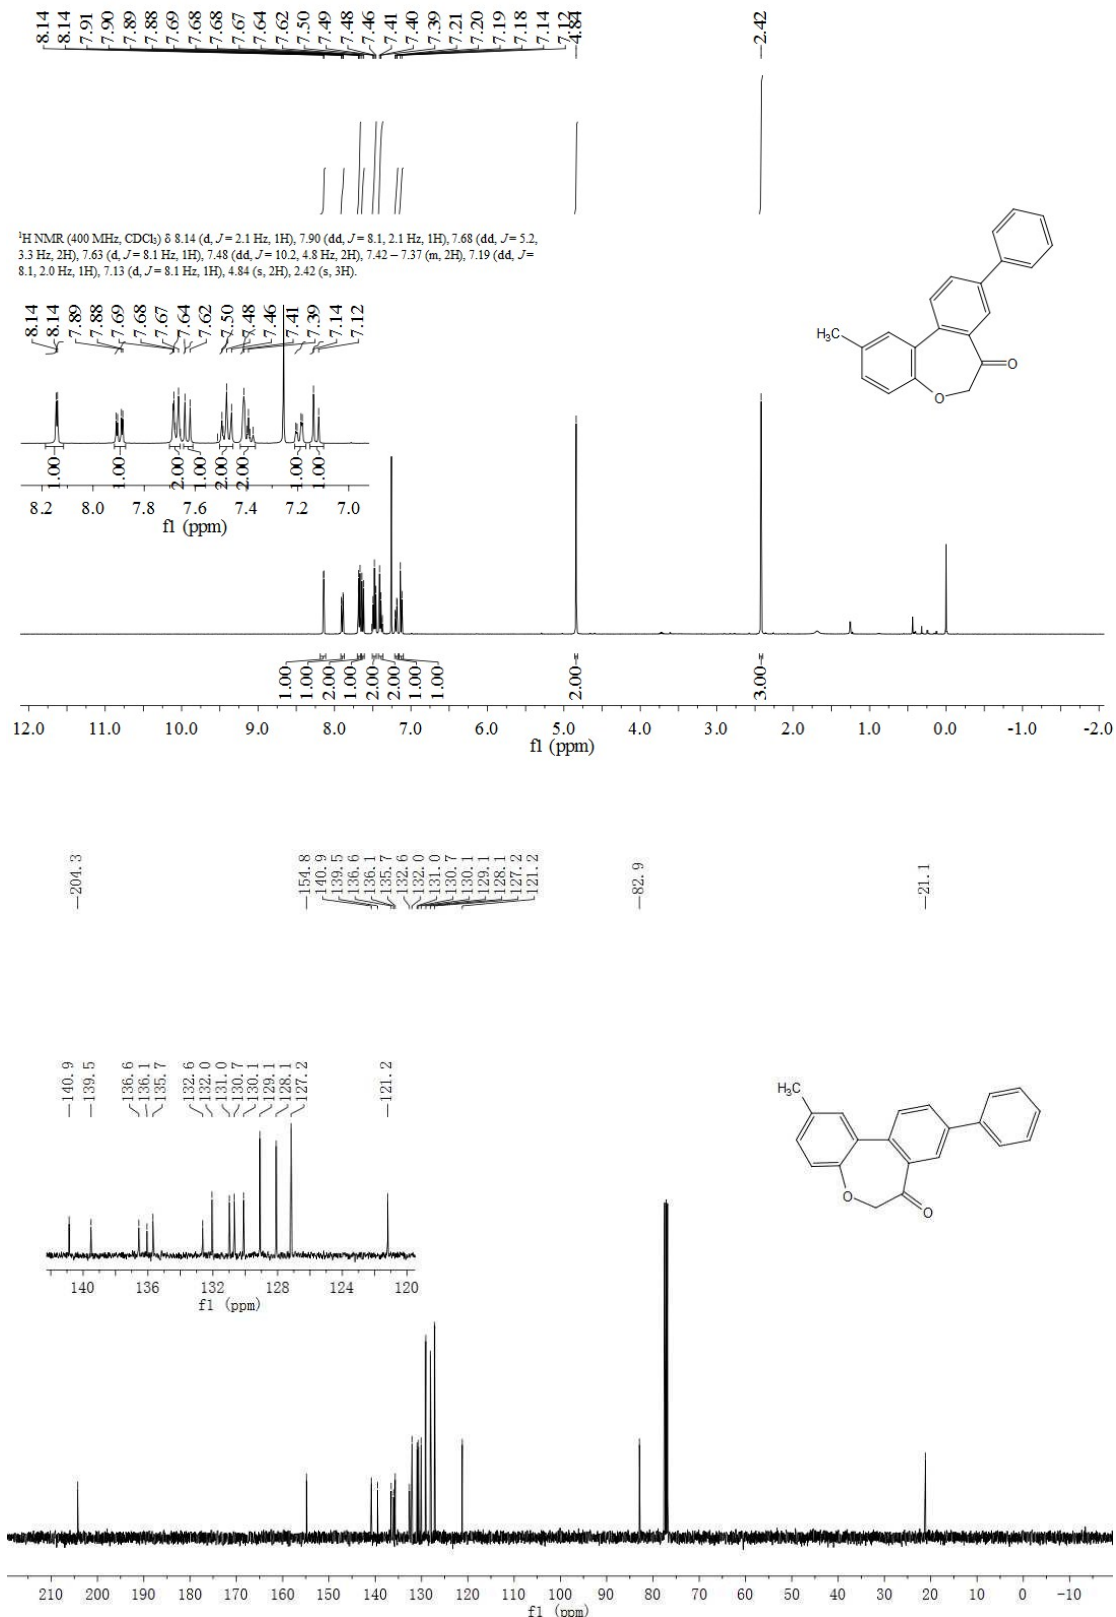

Fig. S46 NMR spectra of **4n**

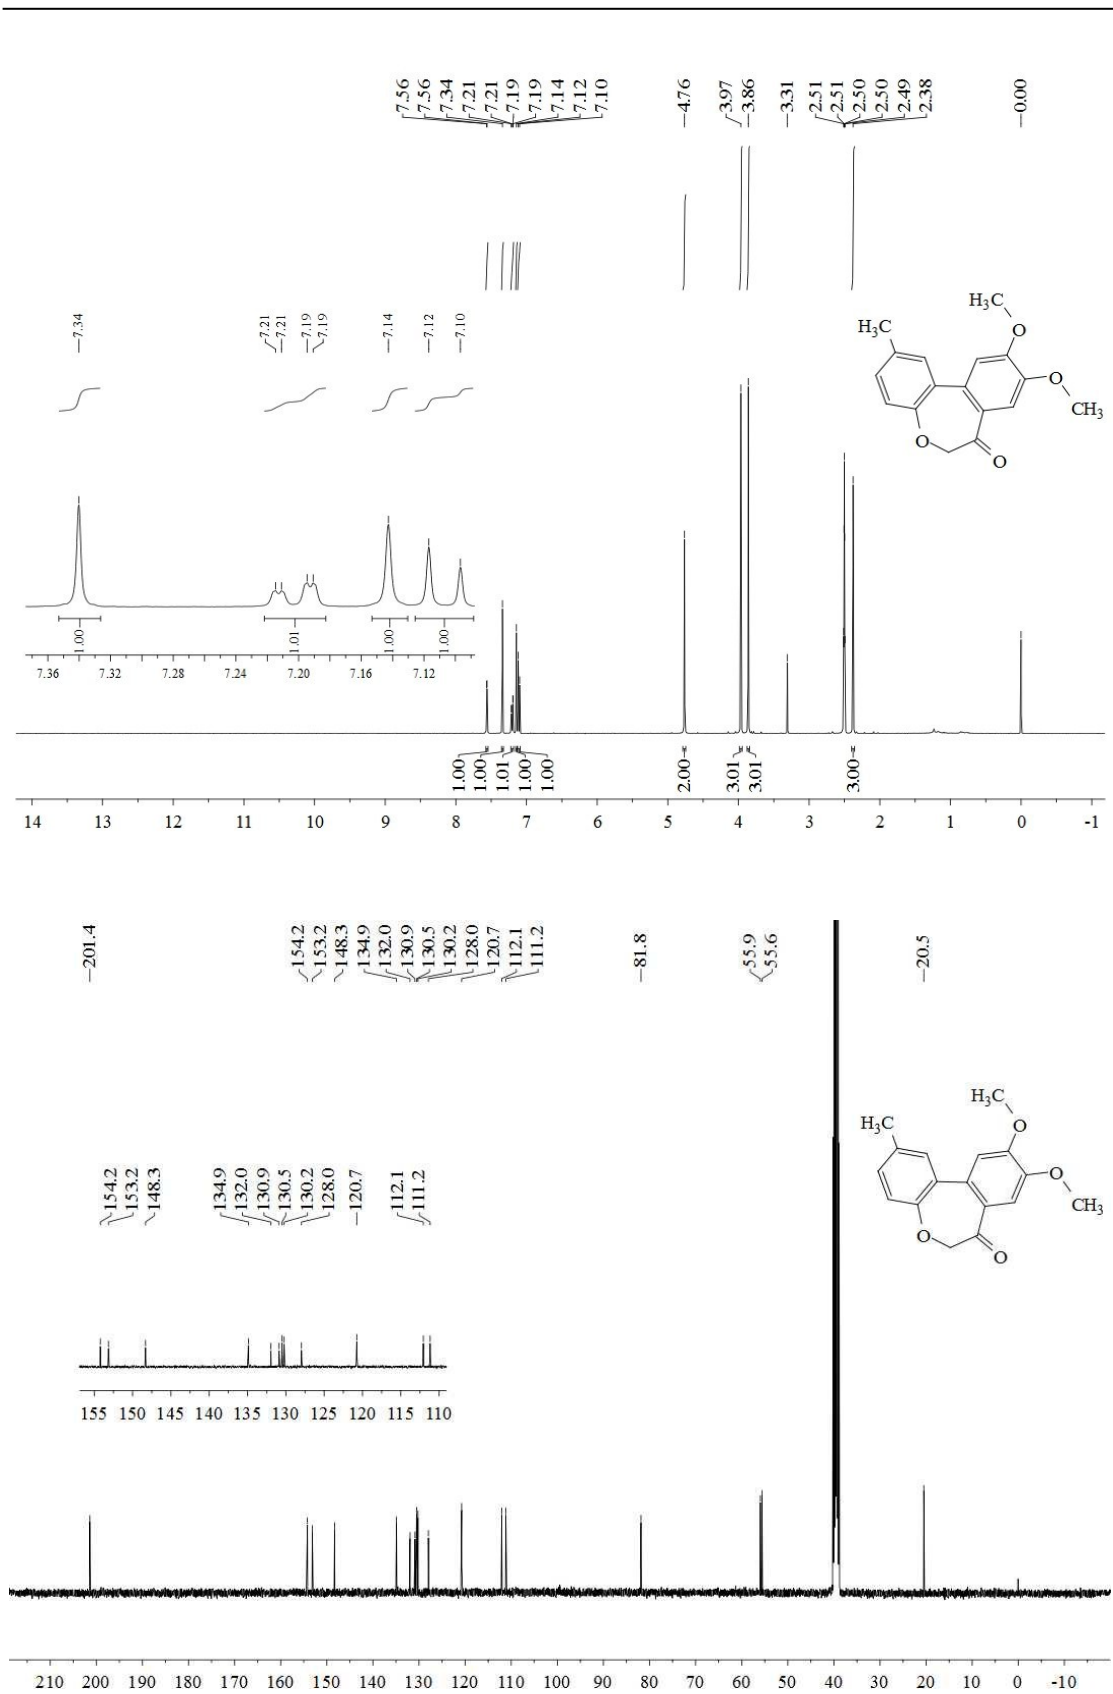

Fig. S47 NMR spectra of **40**

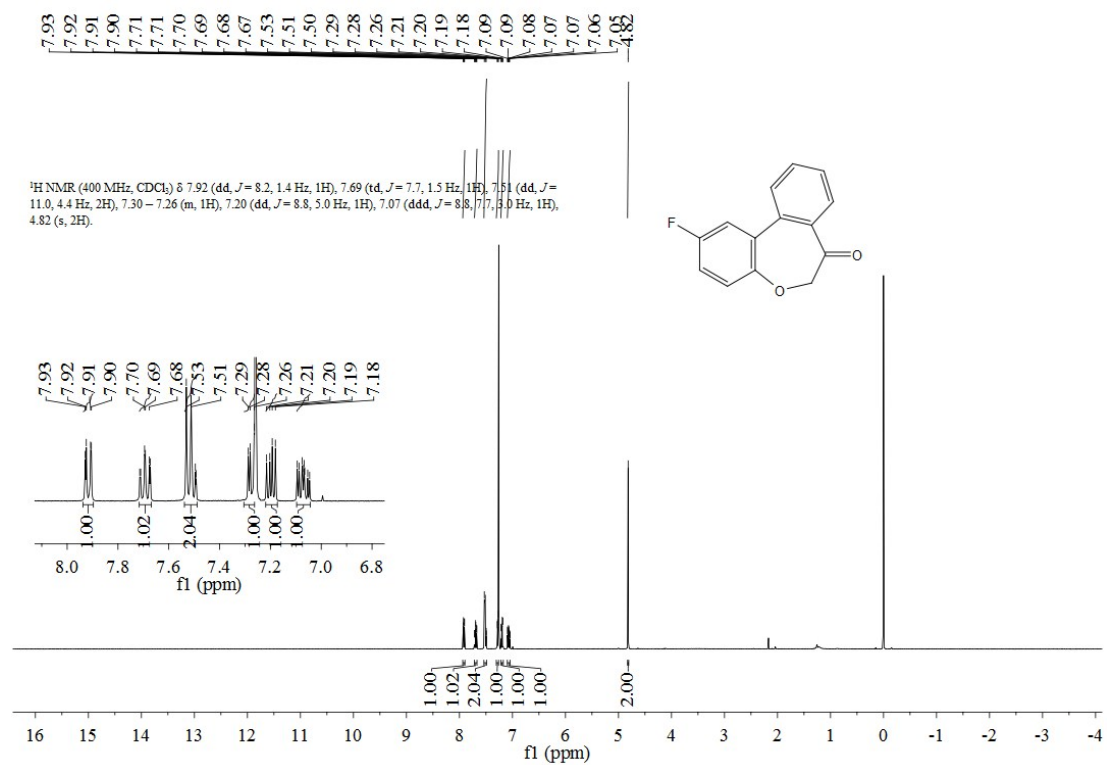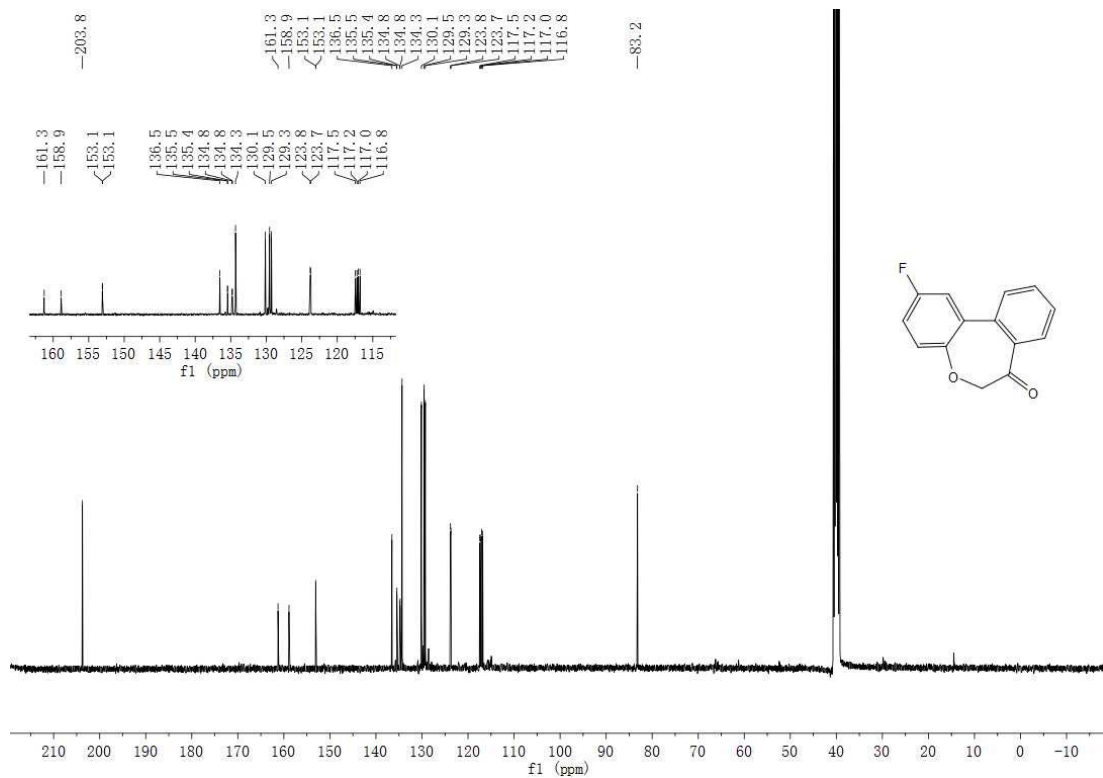

Fig. S48 NMR spectra of **4p**

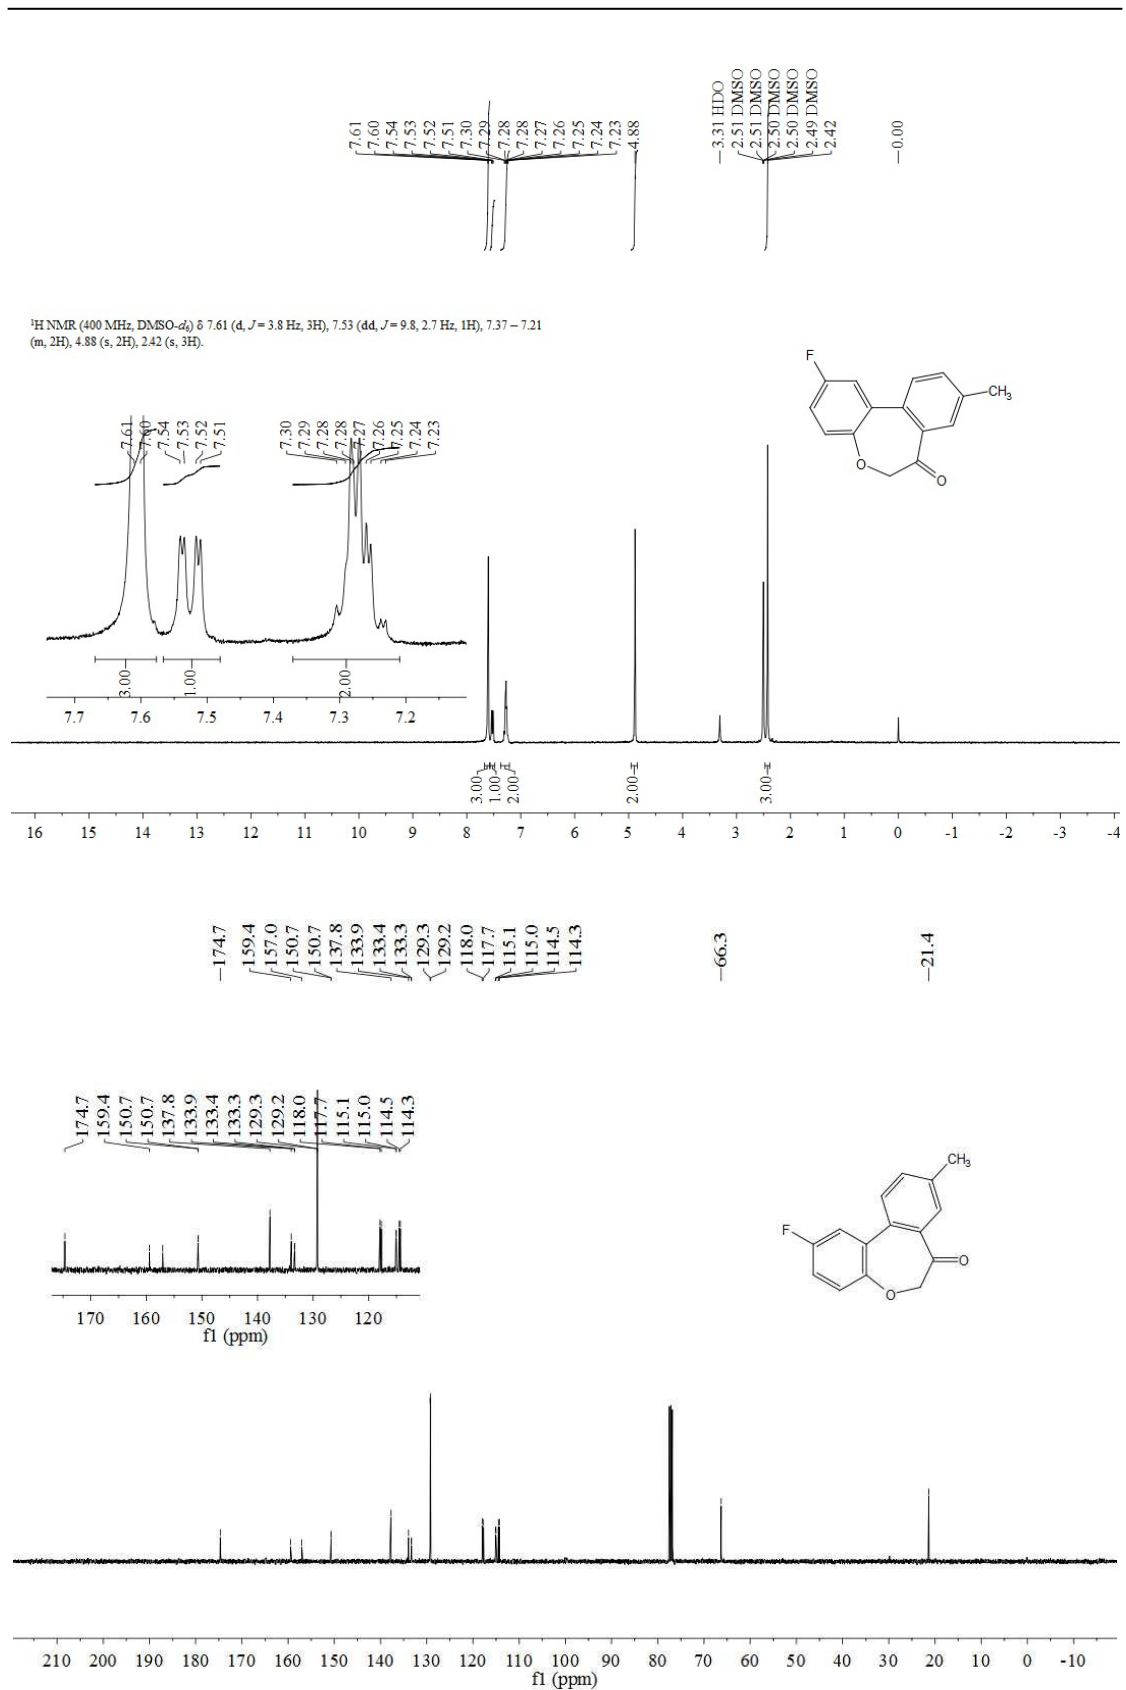

Fig. S49 NMR spectra of **4q**

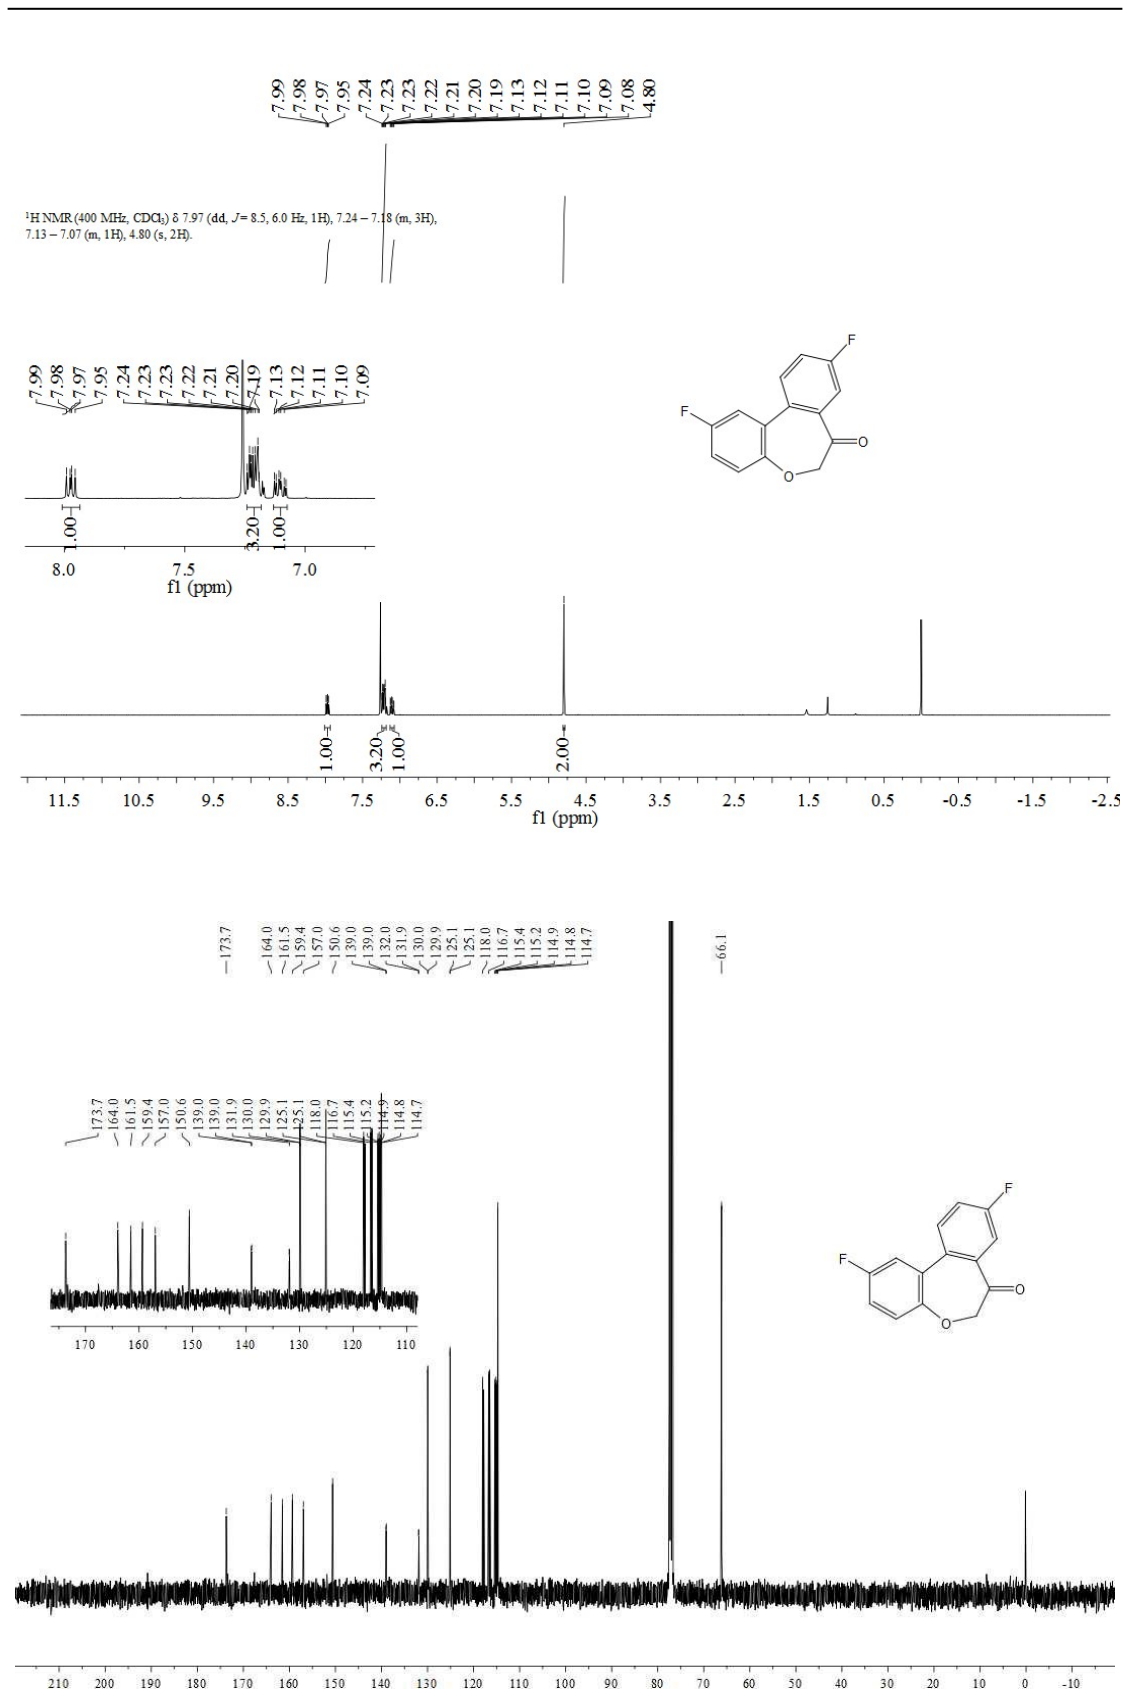

Fig. S50 NMR spectra of **4r**



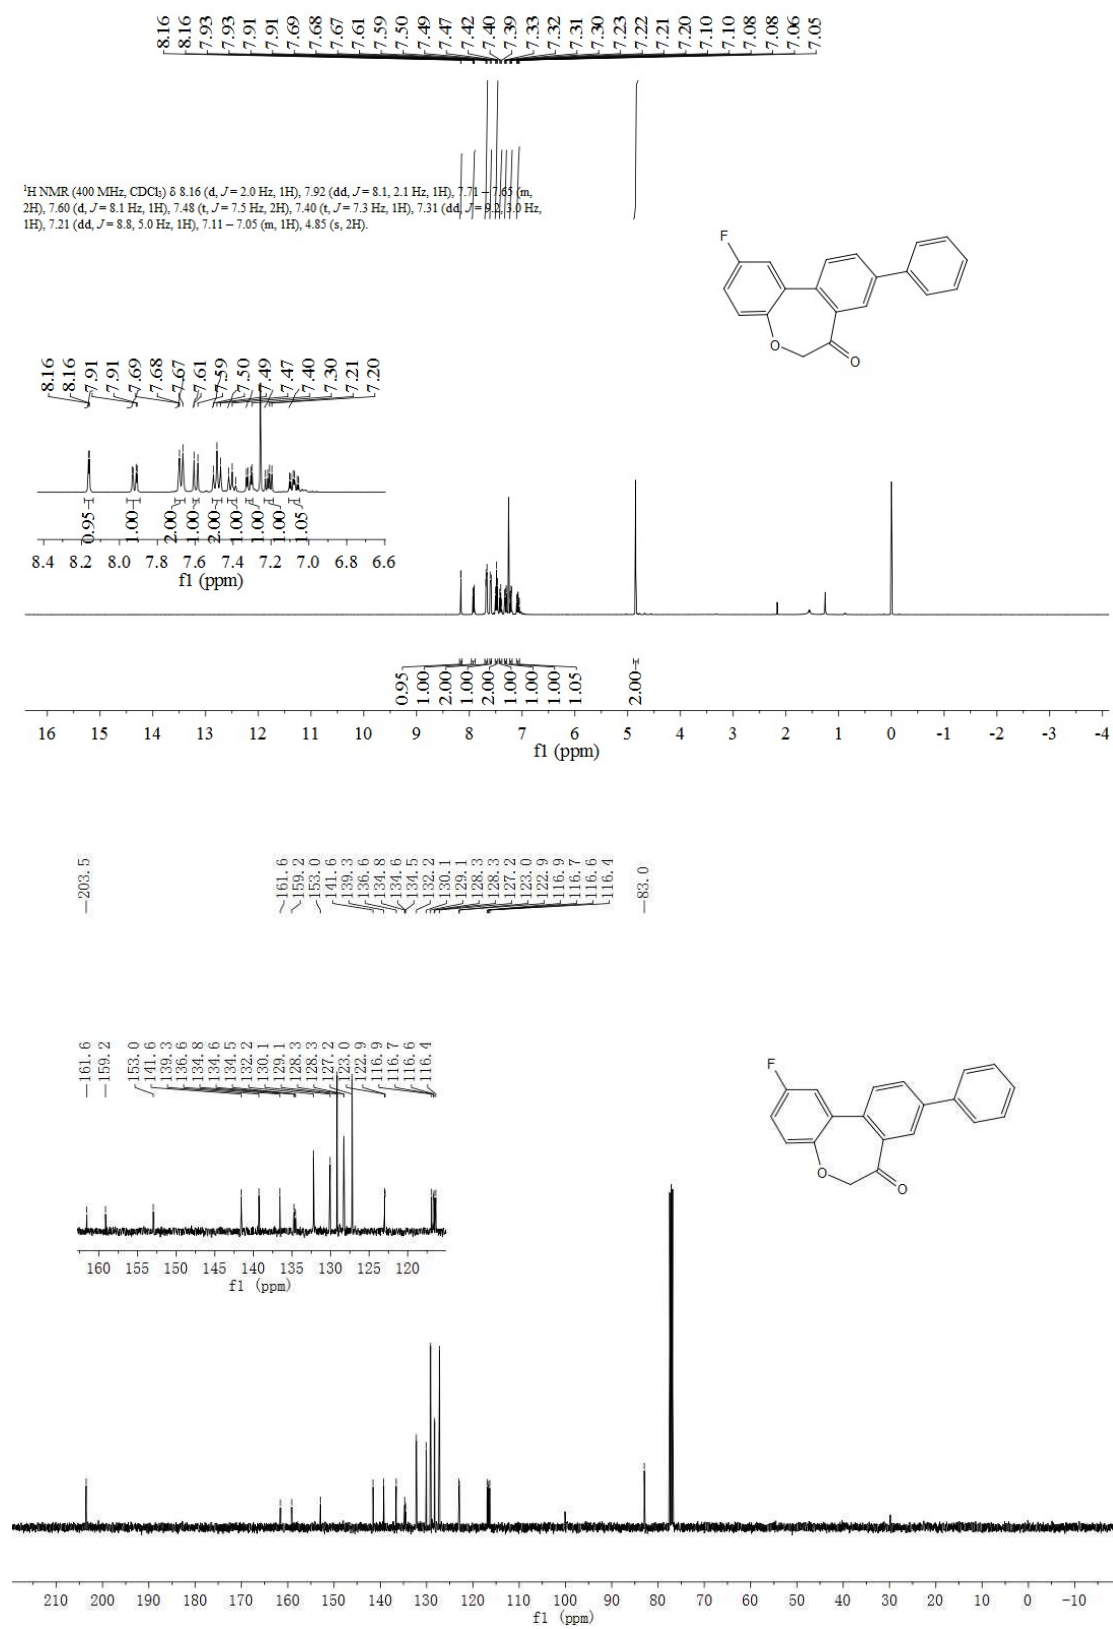

Fig. S51 NMR spectra of 4s

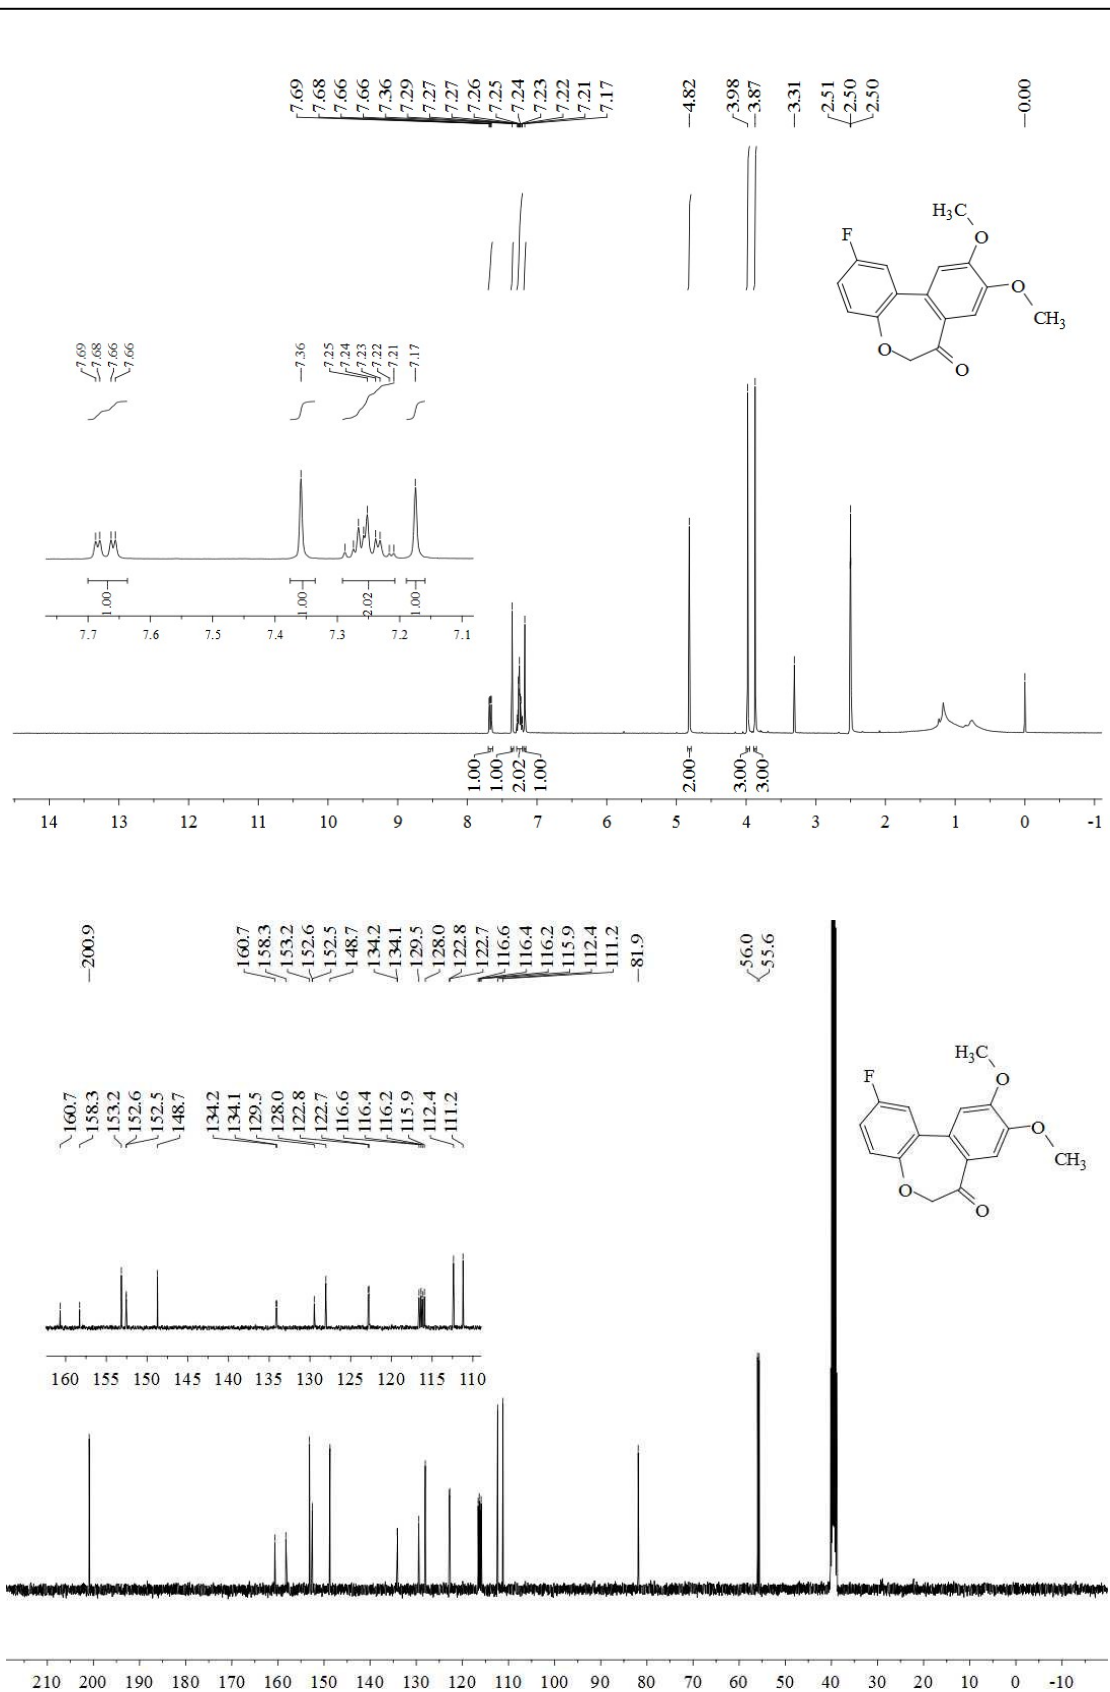

Fig. S52 NMR spectra of 4t

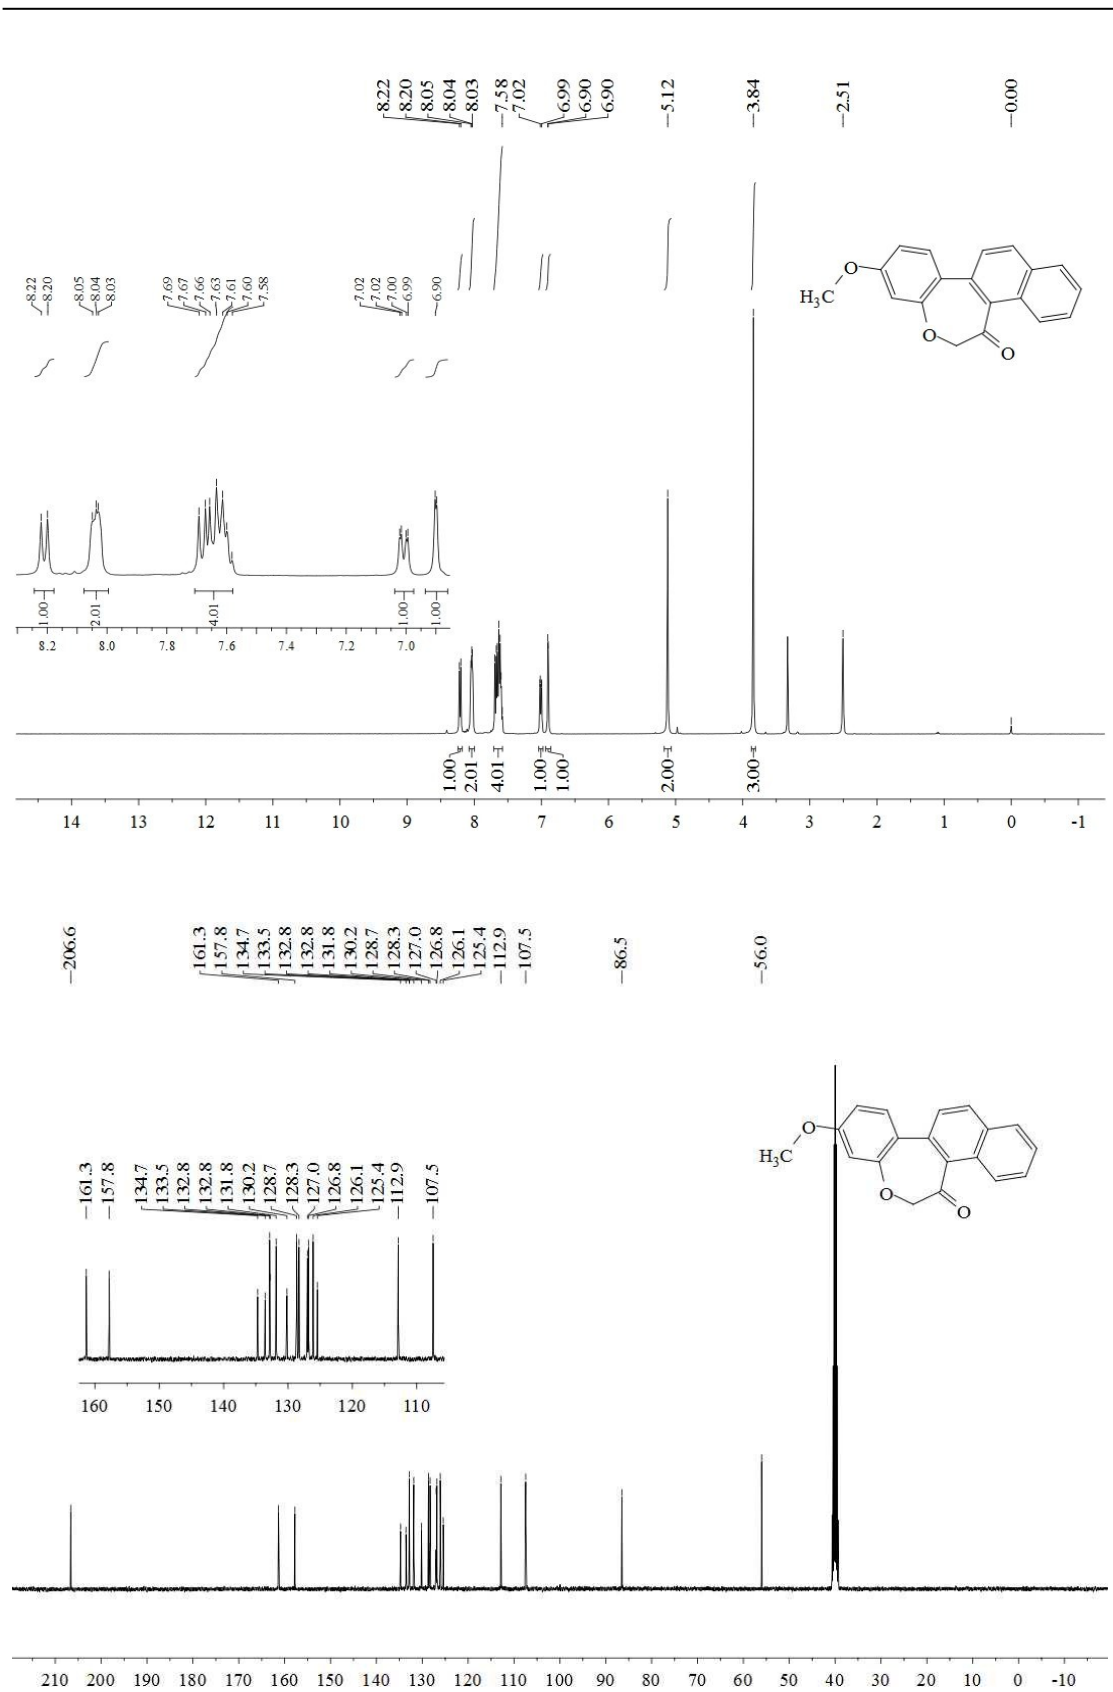

Fig. S53 NMR spectra of **4u**

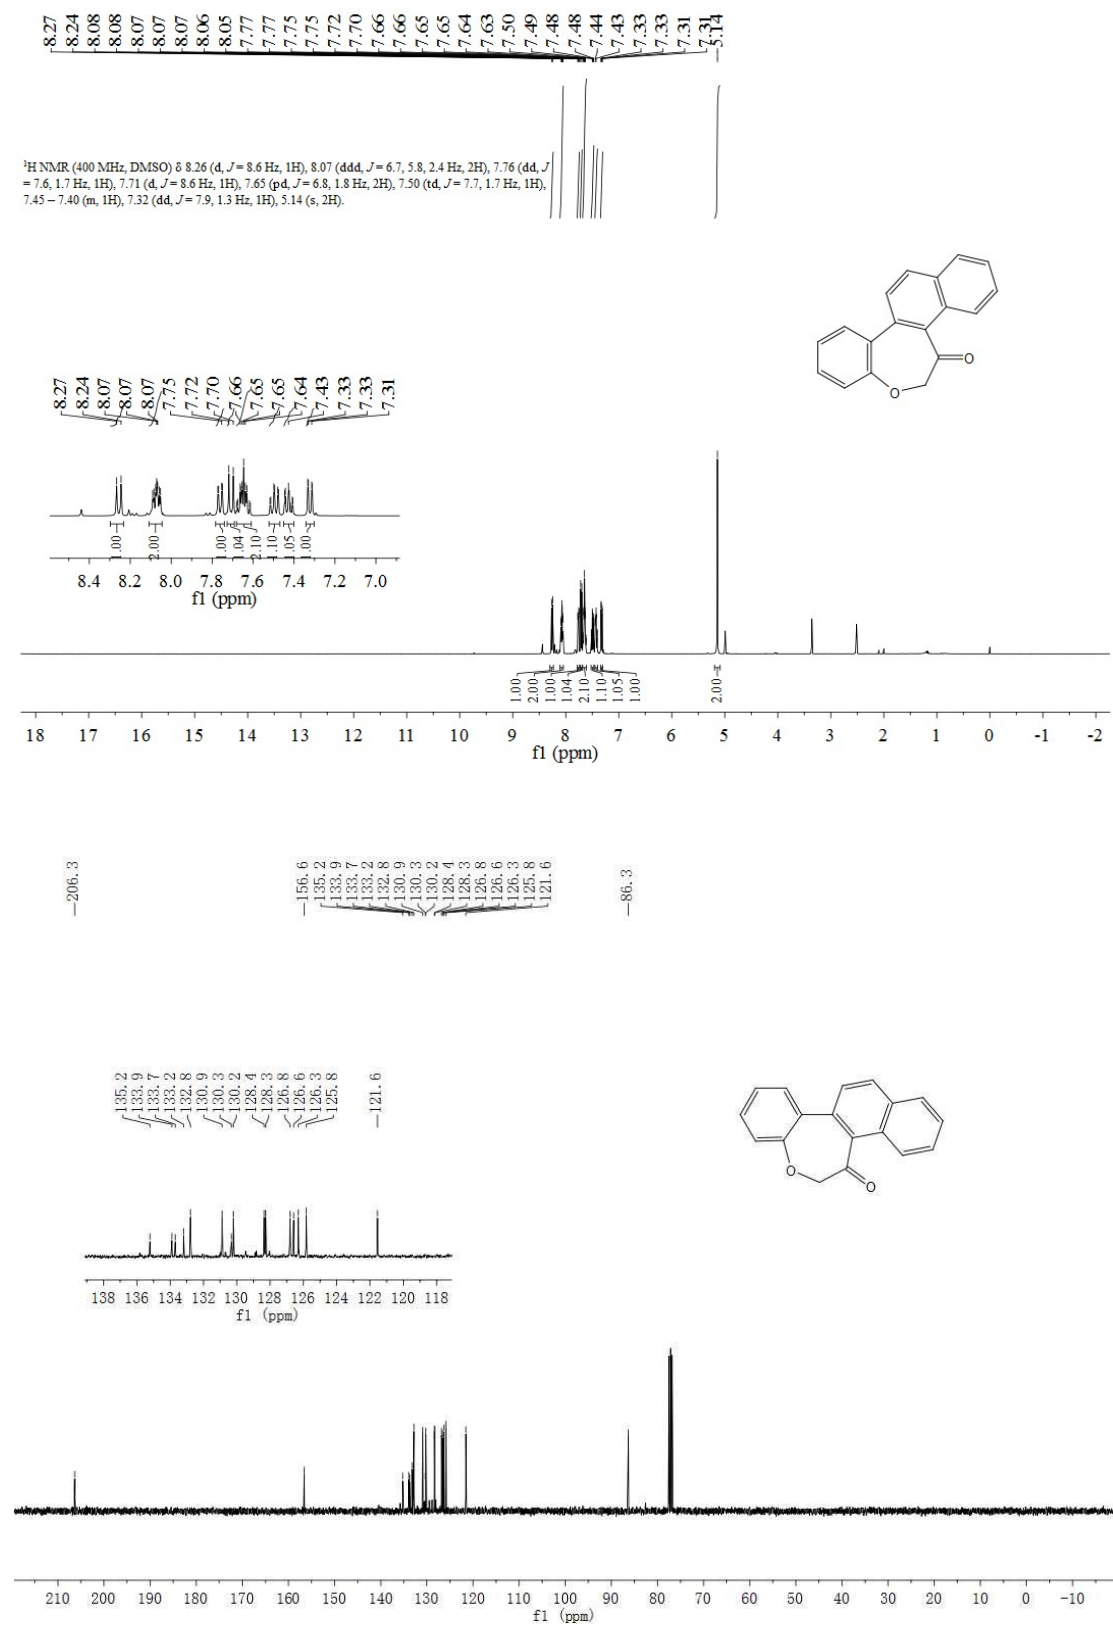

Fig. S54 NMR spectra of 4v

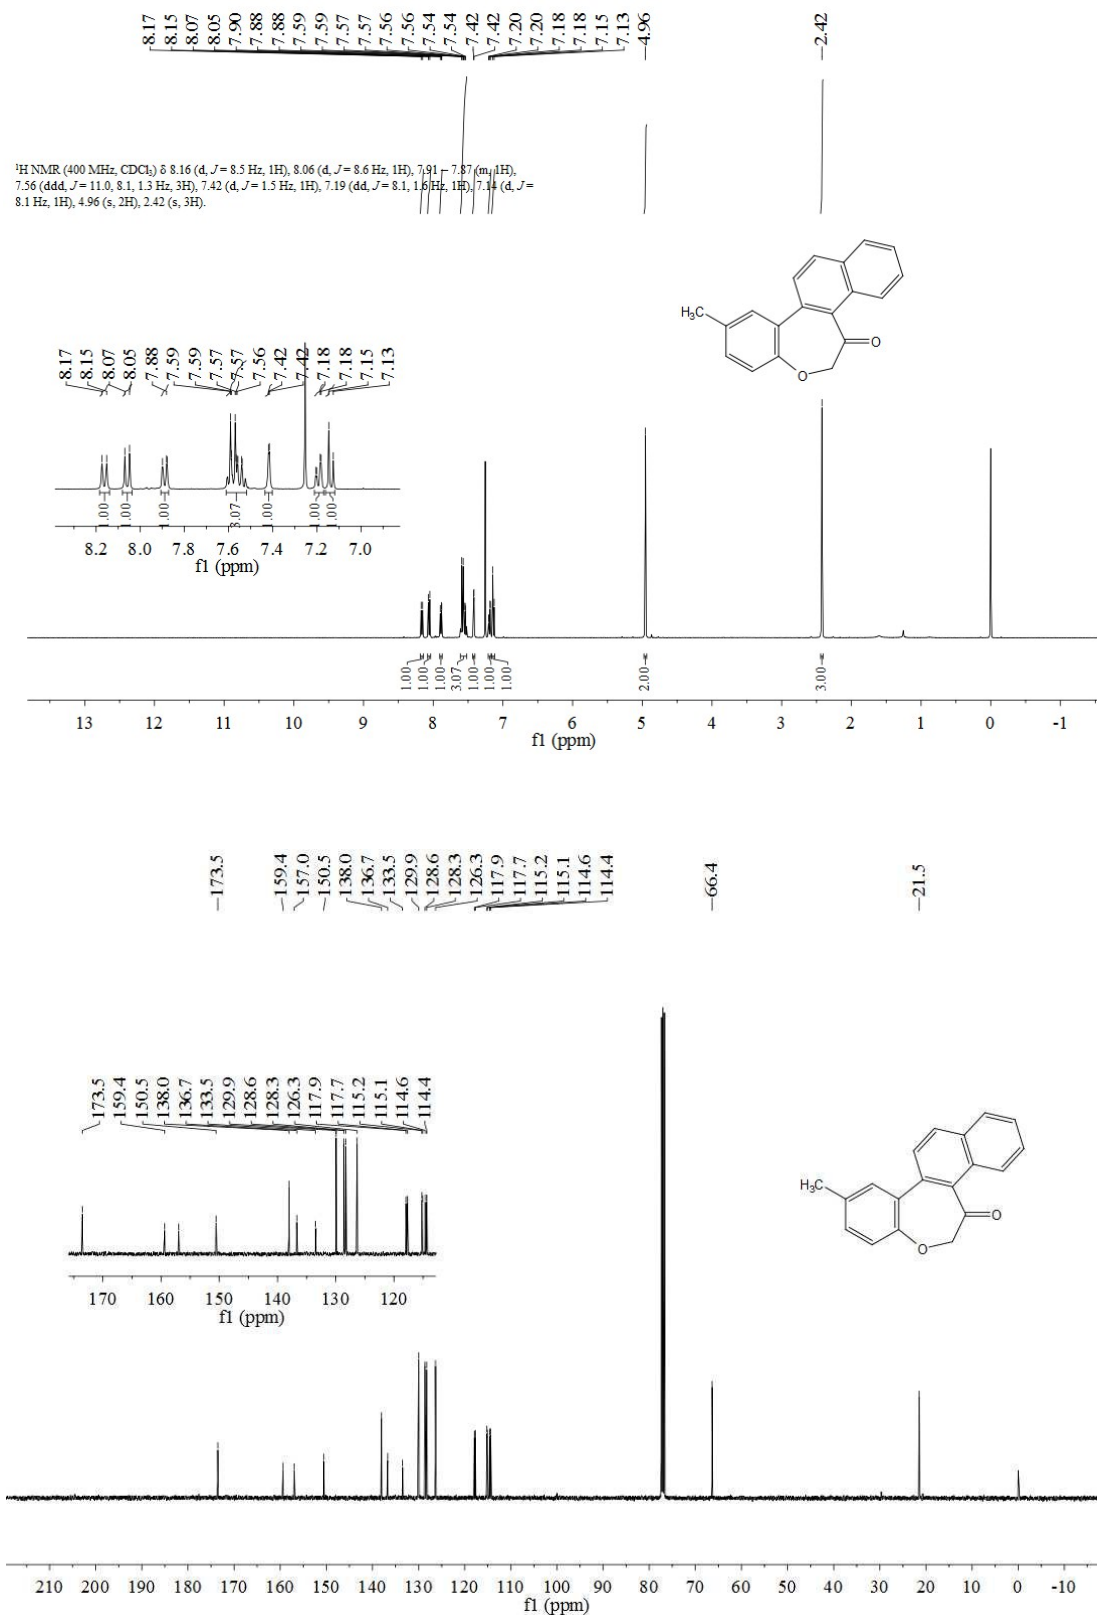

Fig. S55 NMR spectra of 4w

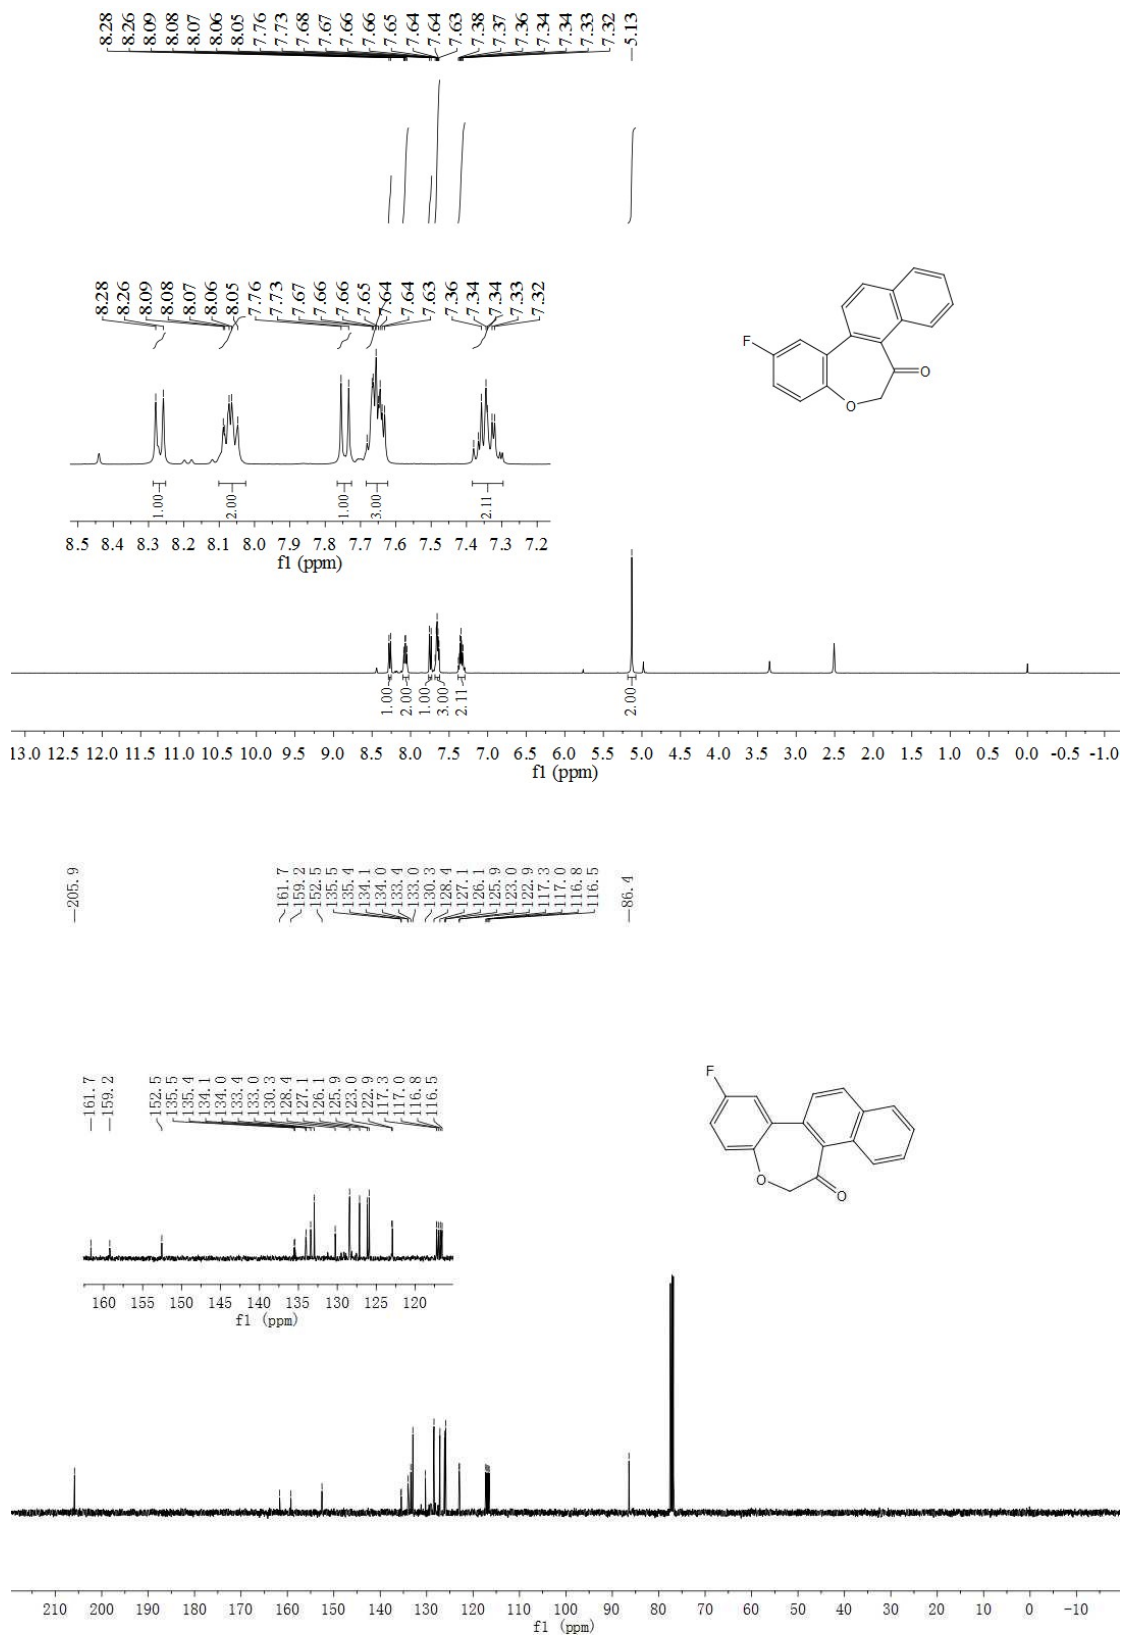

Fig. S56 NMR spectra of 4x

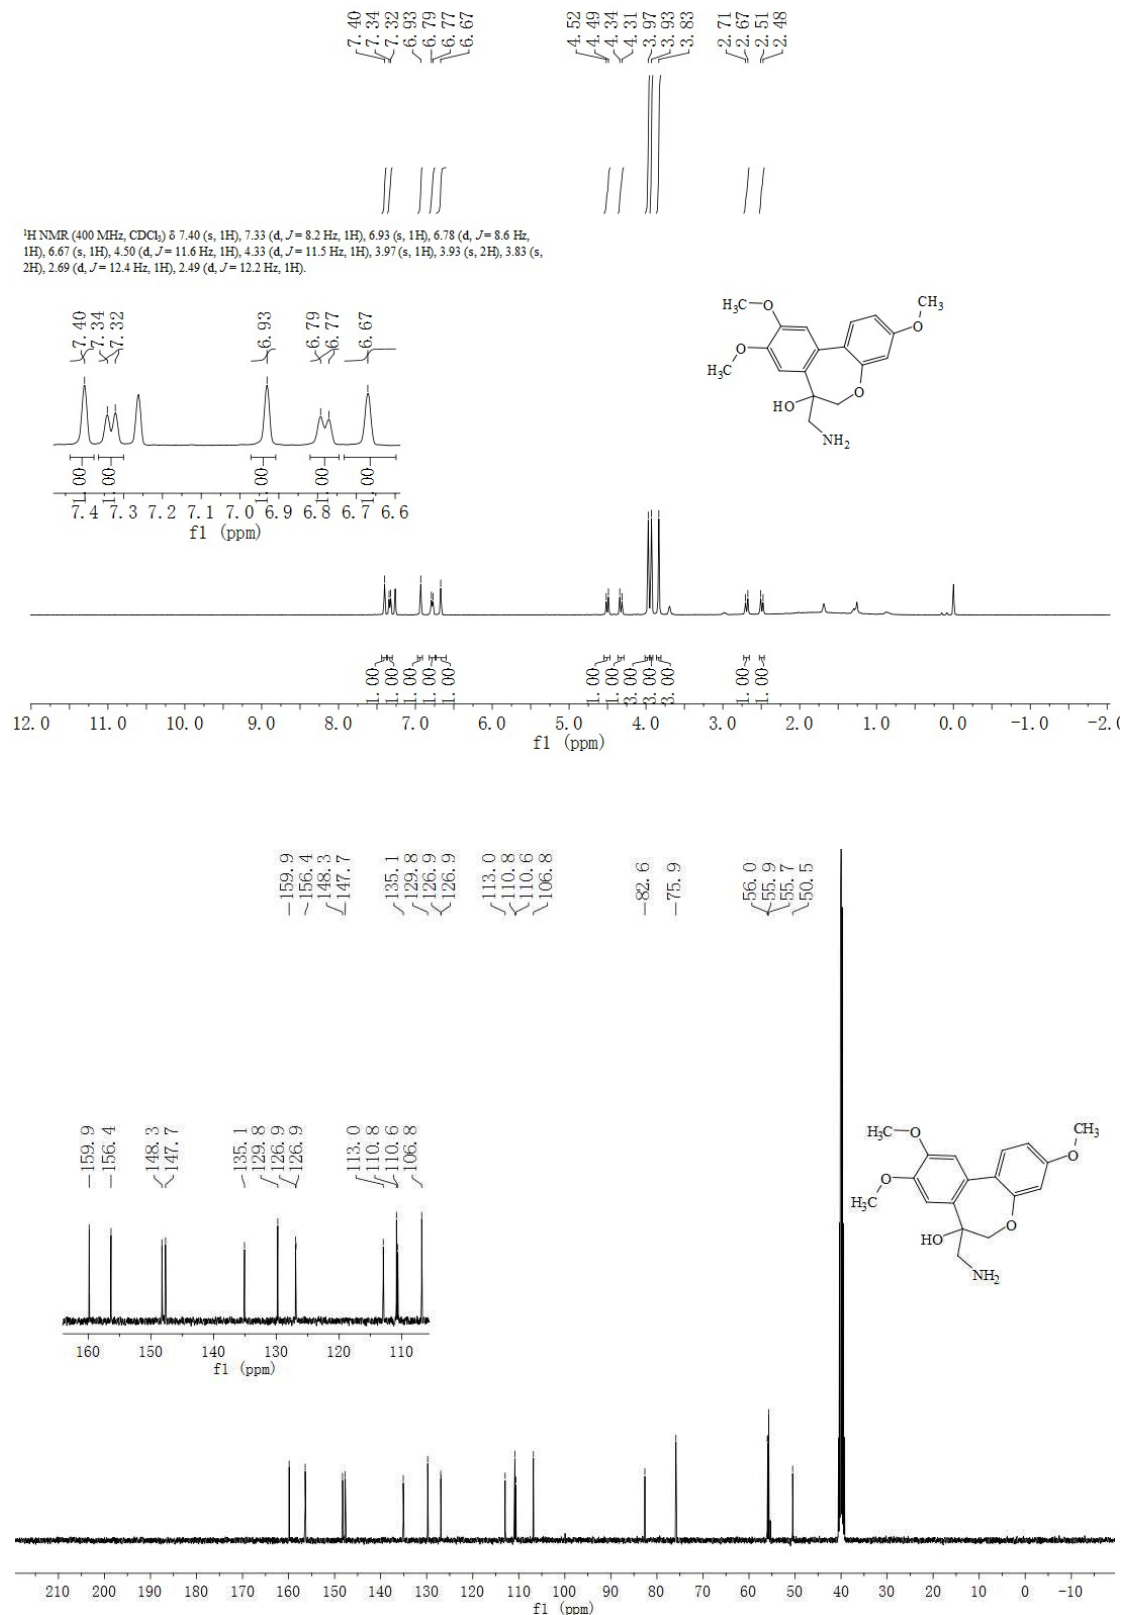

Fig. S57 NMR spectra of **6a**

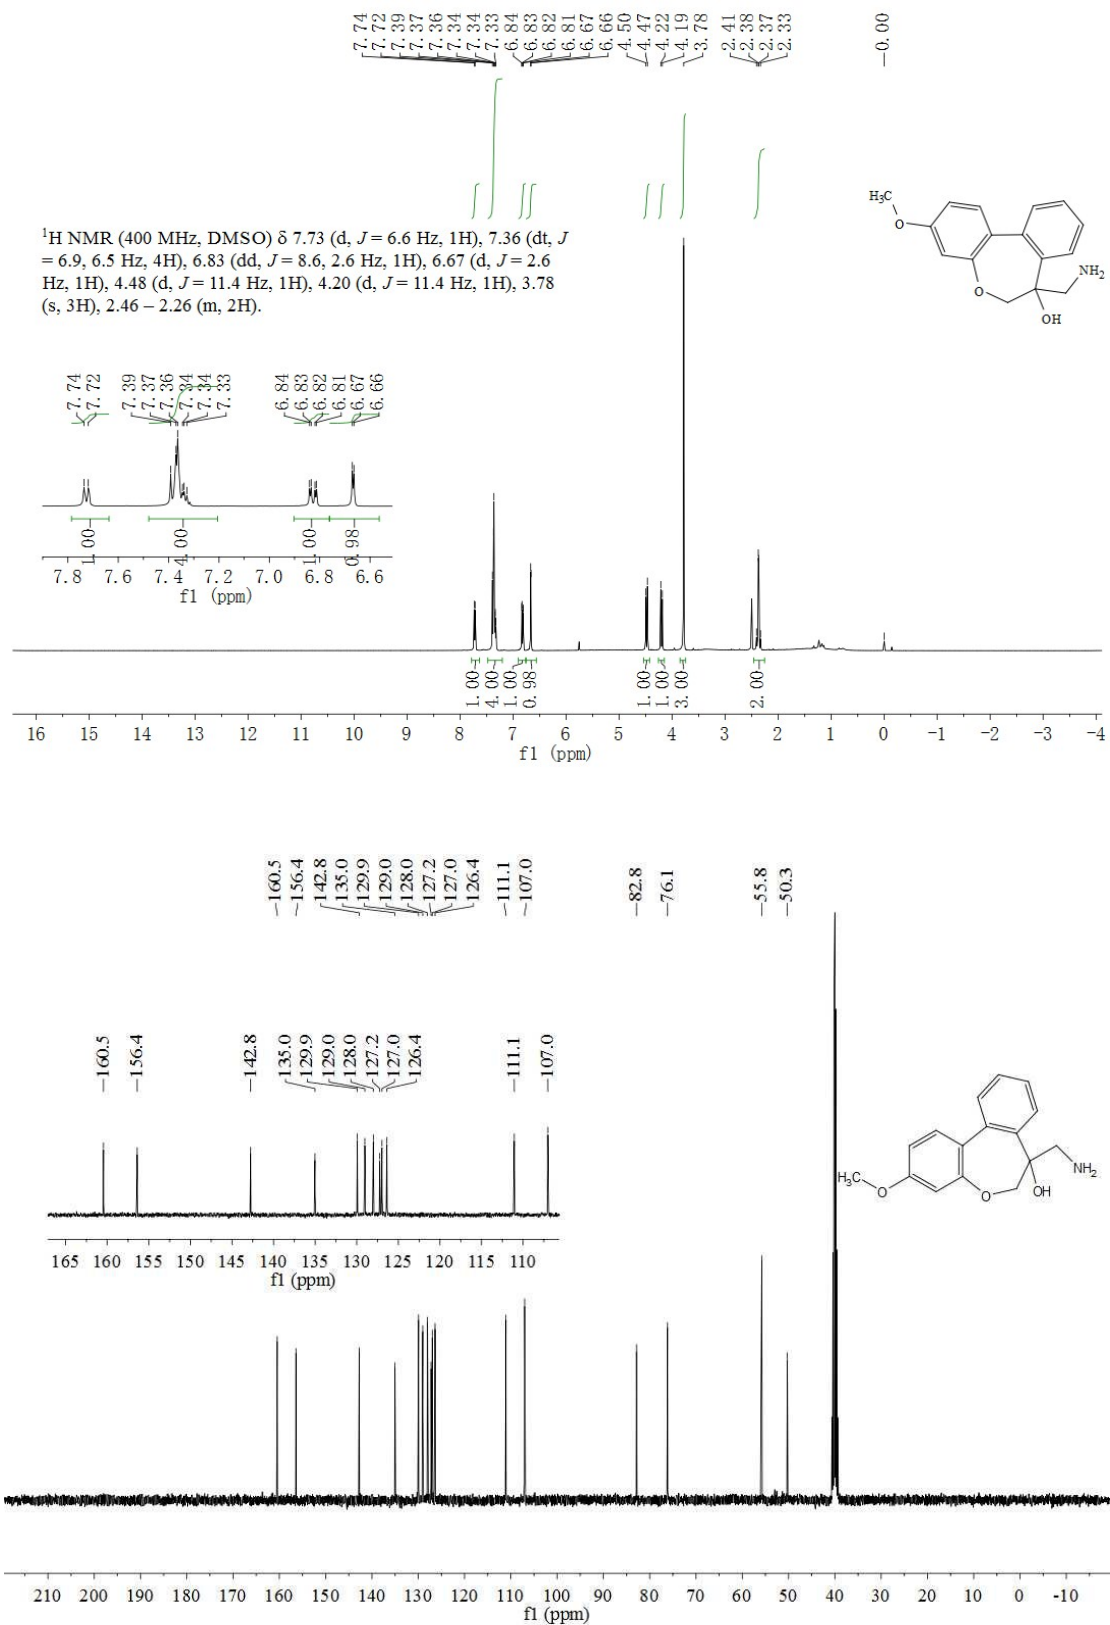

Fig. S58 NMR spectra of **6b**



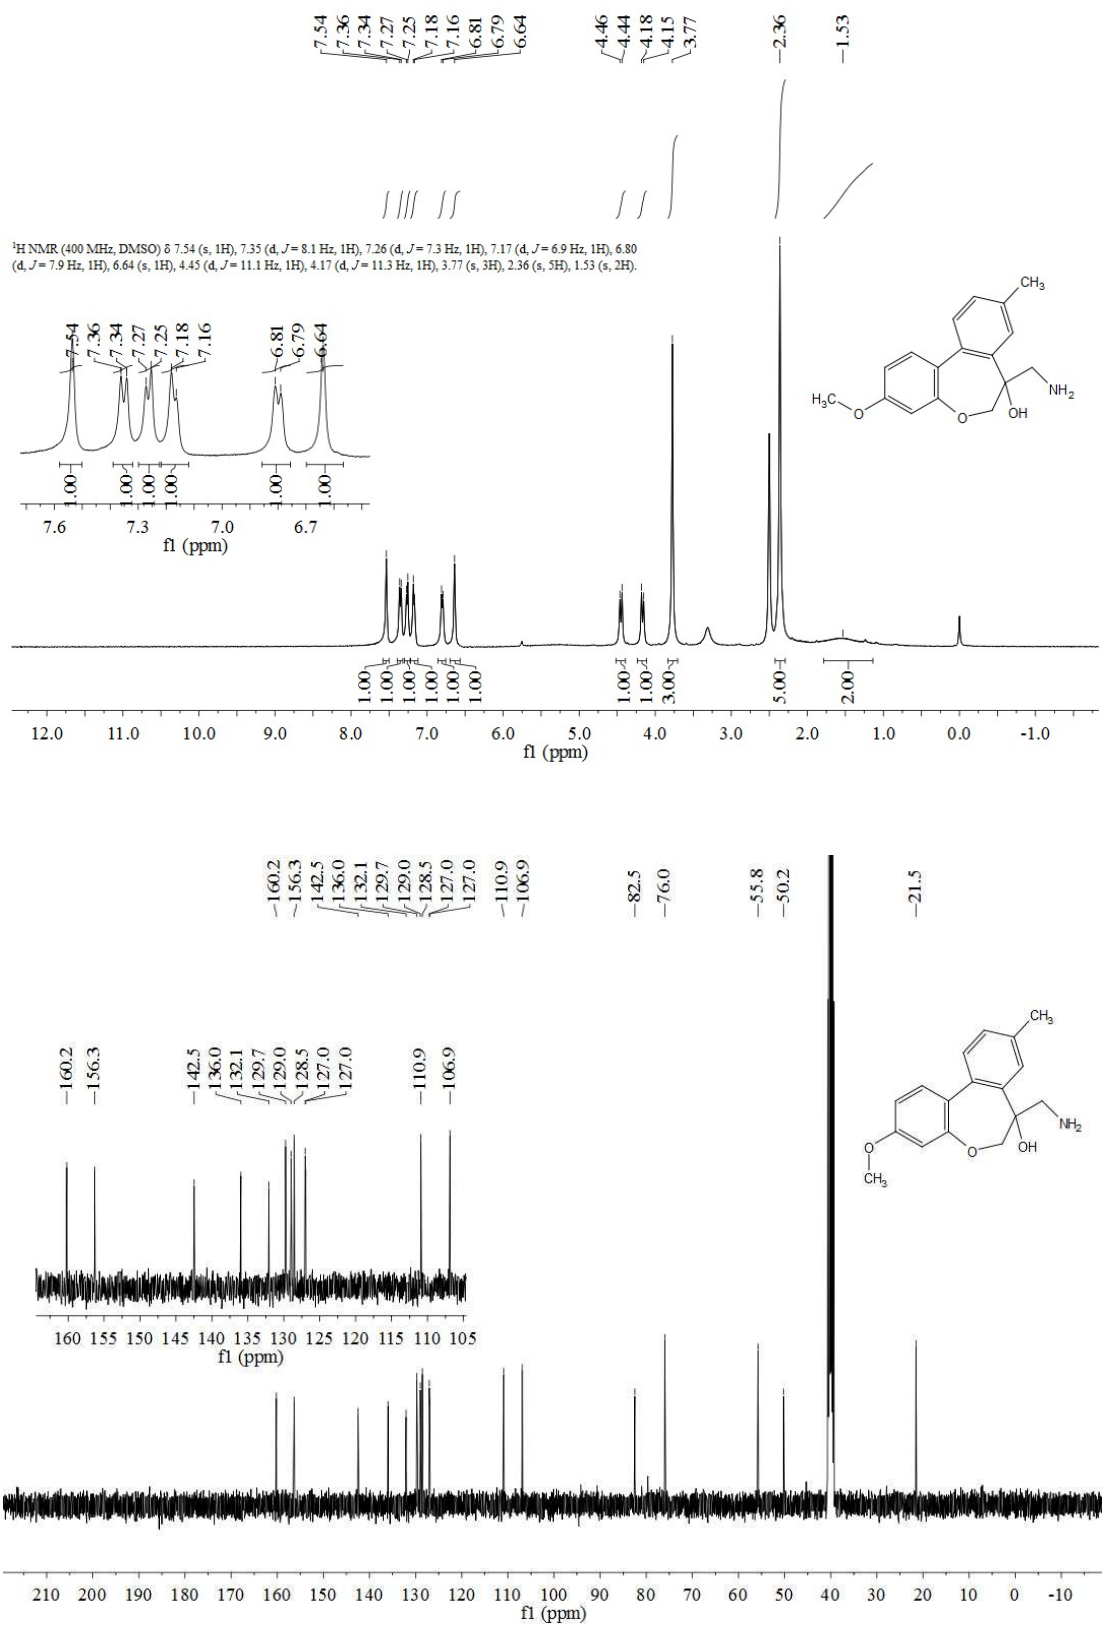

Fig. S59 NMR spectra of **6c**

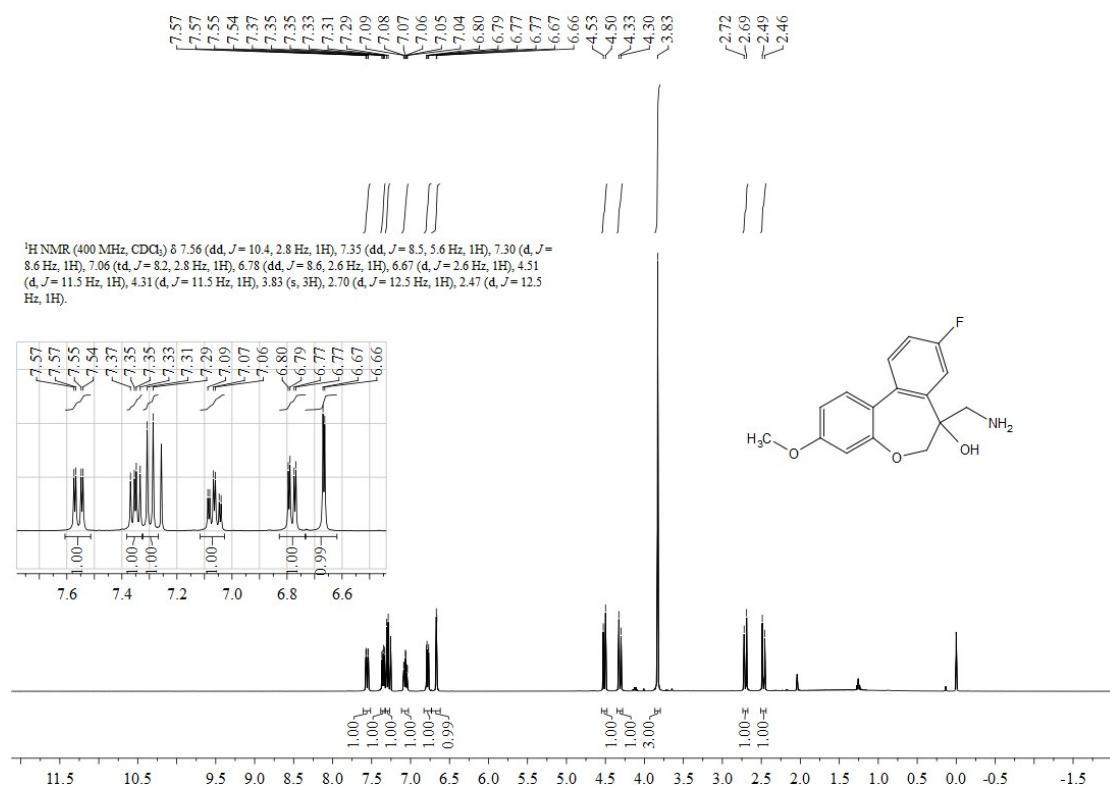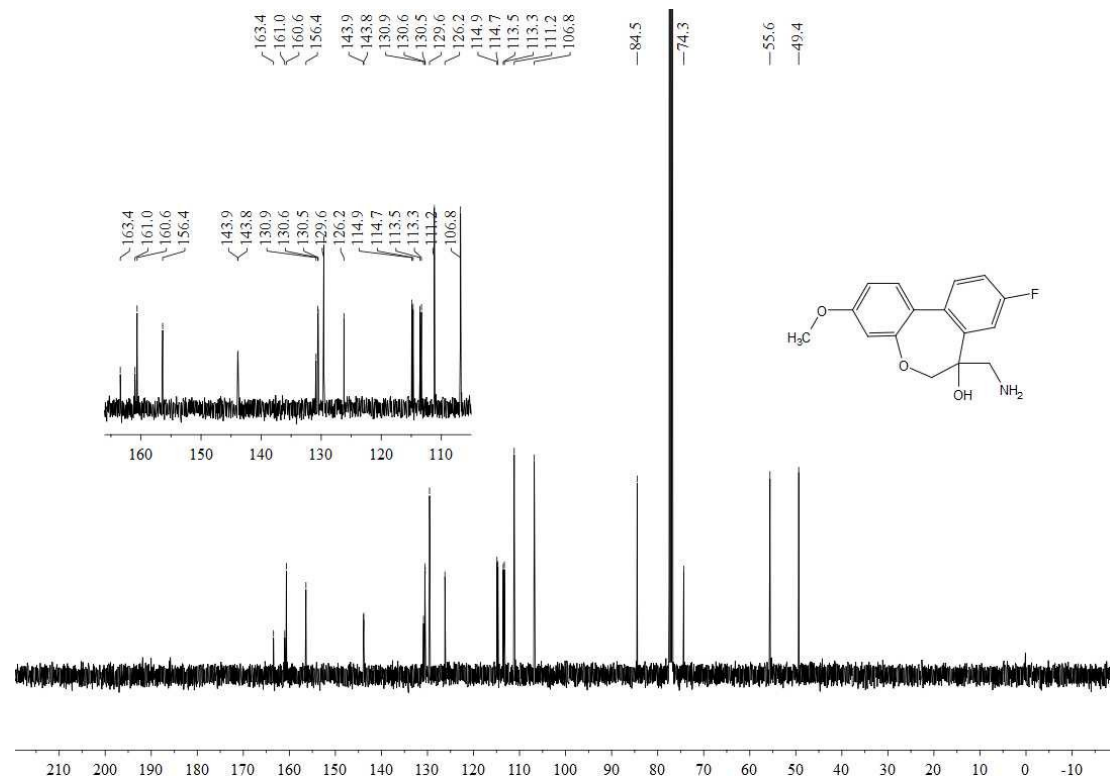

Fig. S60 NMR spectra of **6d**

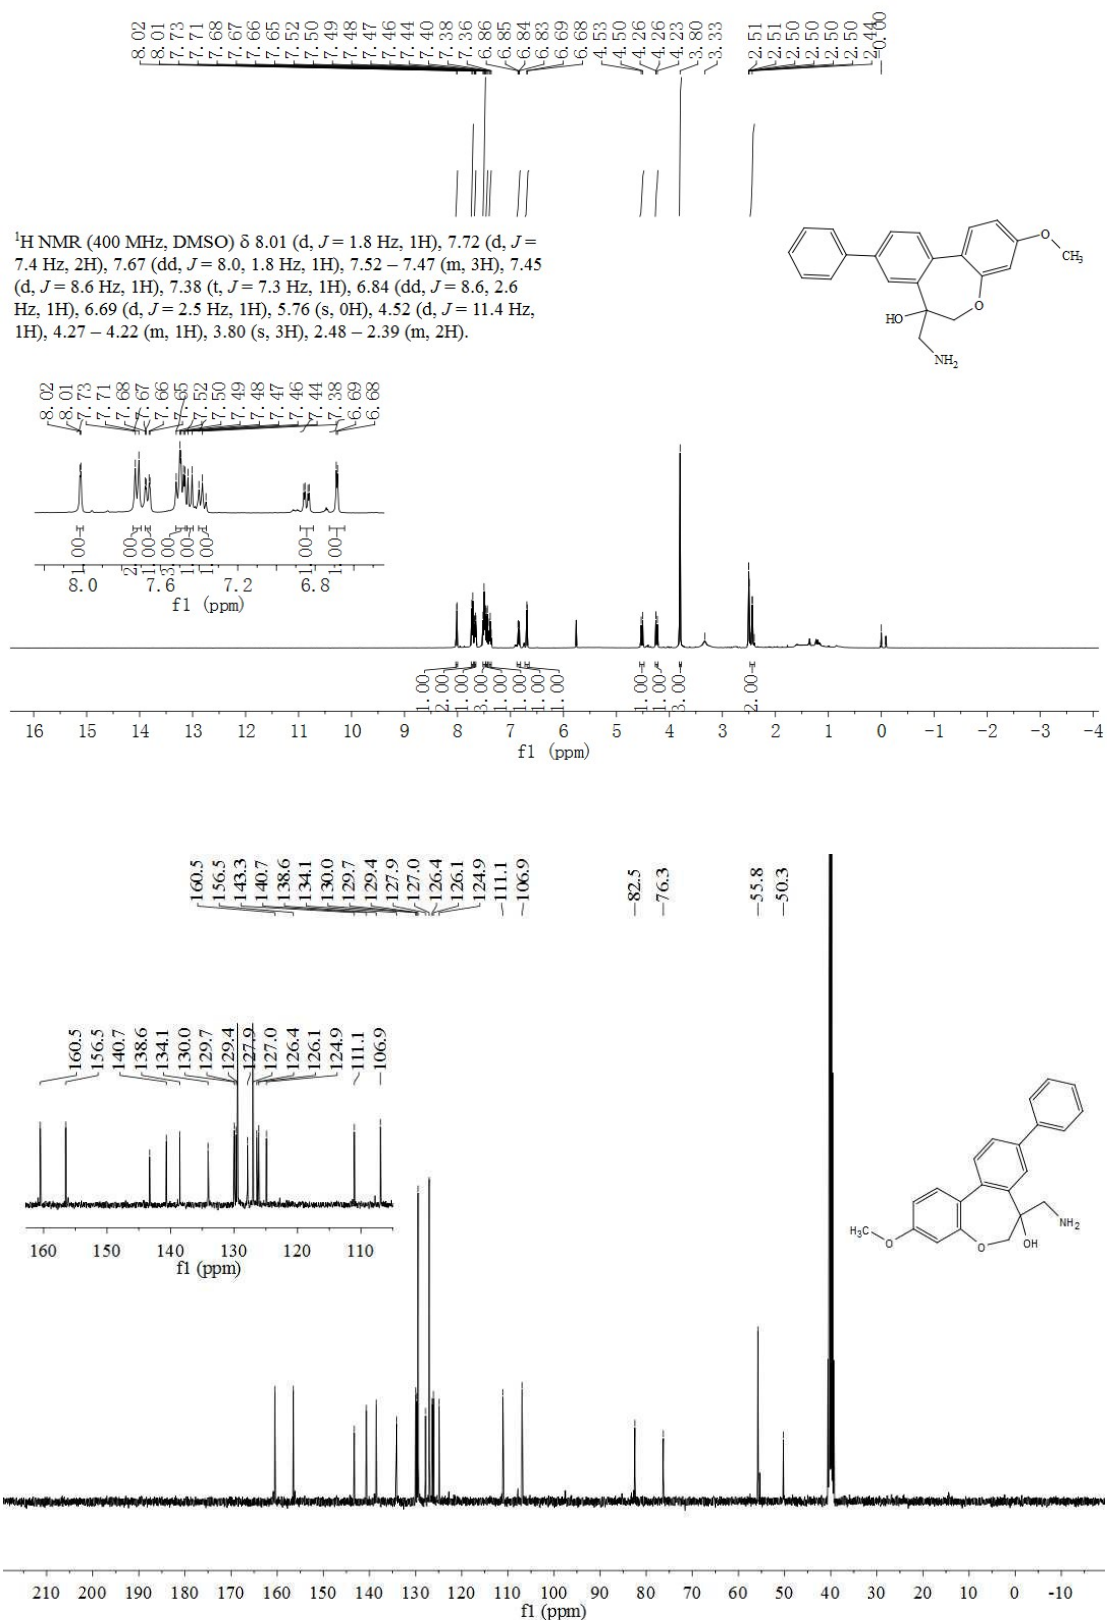

Fig. S61 NMR spectra of **6e**

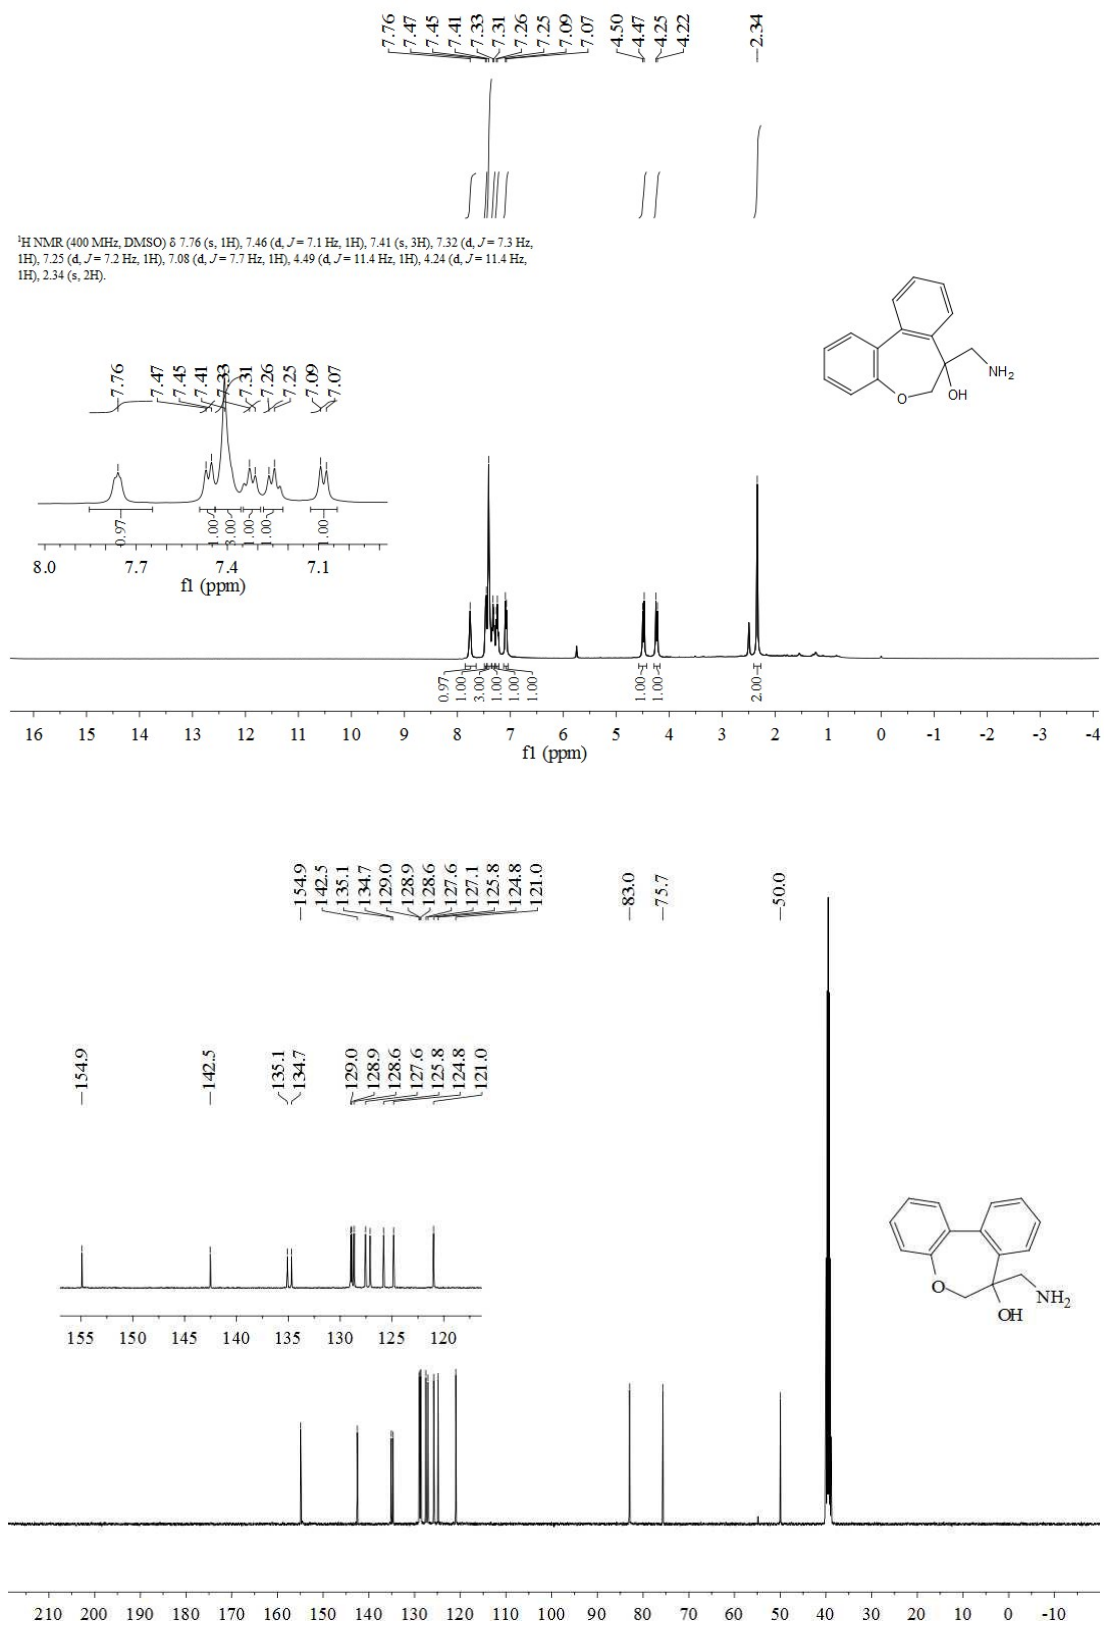

Fig. S62 NMR spectra of **6f**

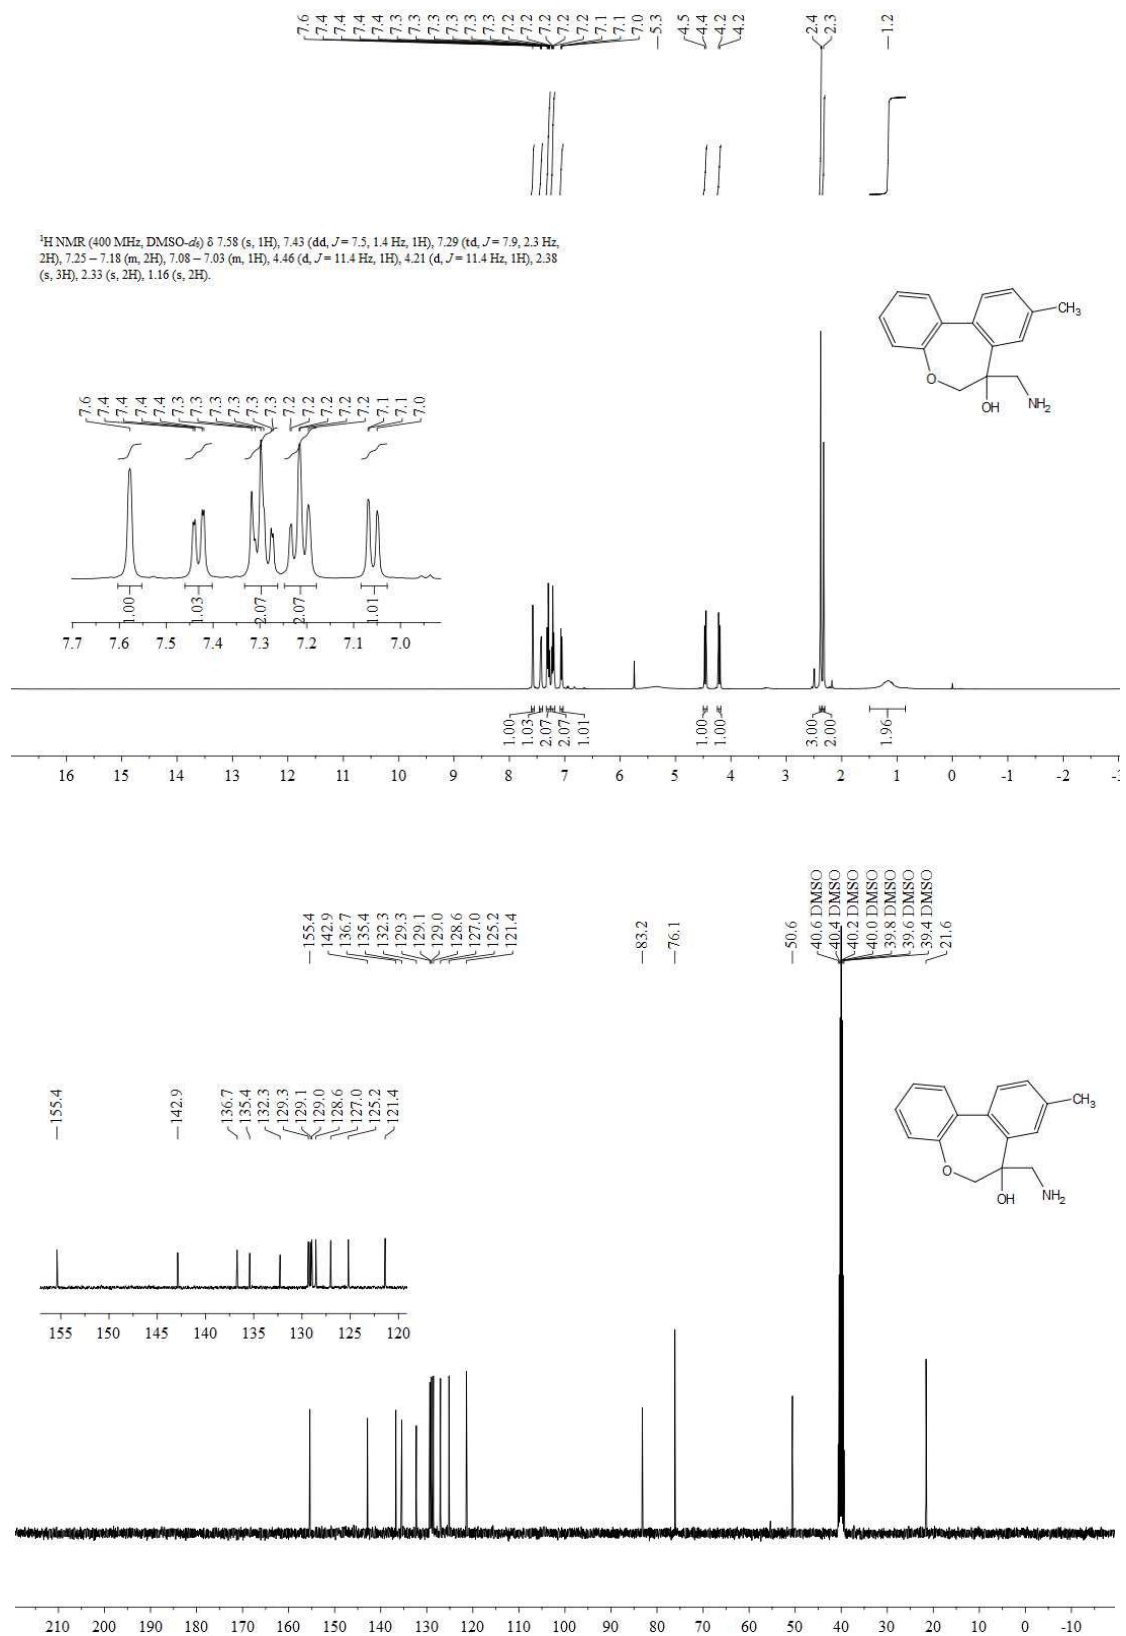

Fig. S63 NMR spectra of **6g**

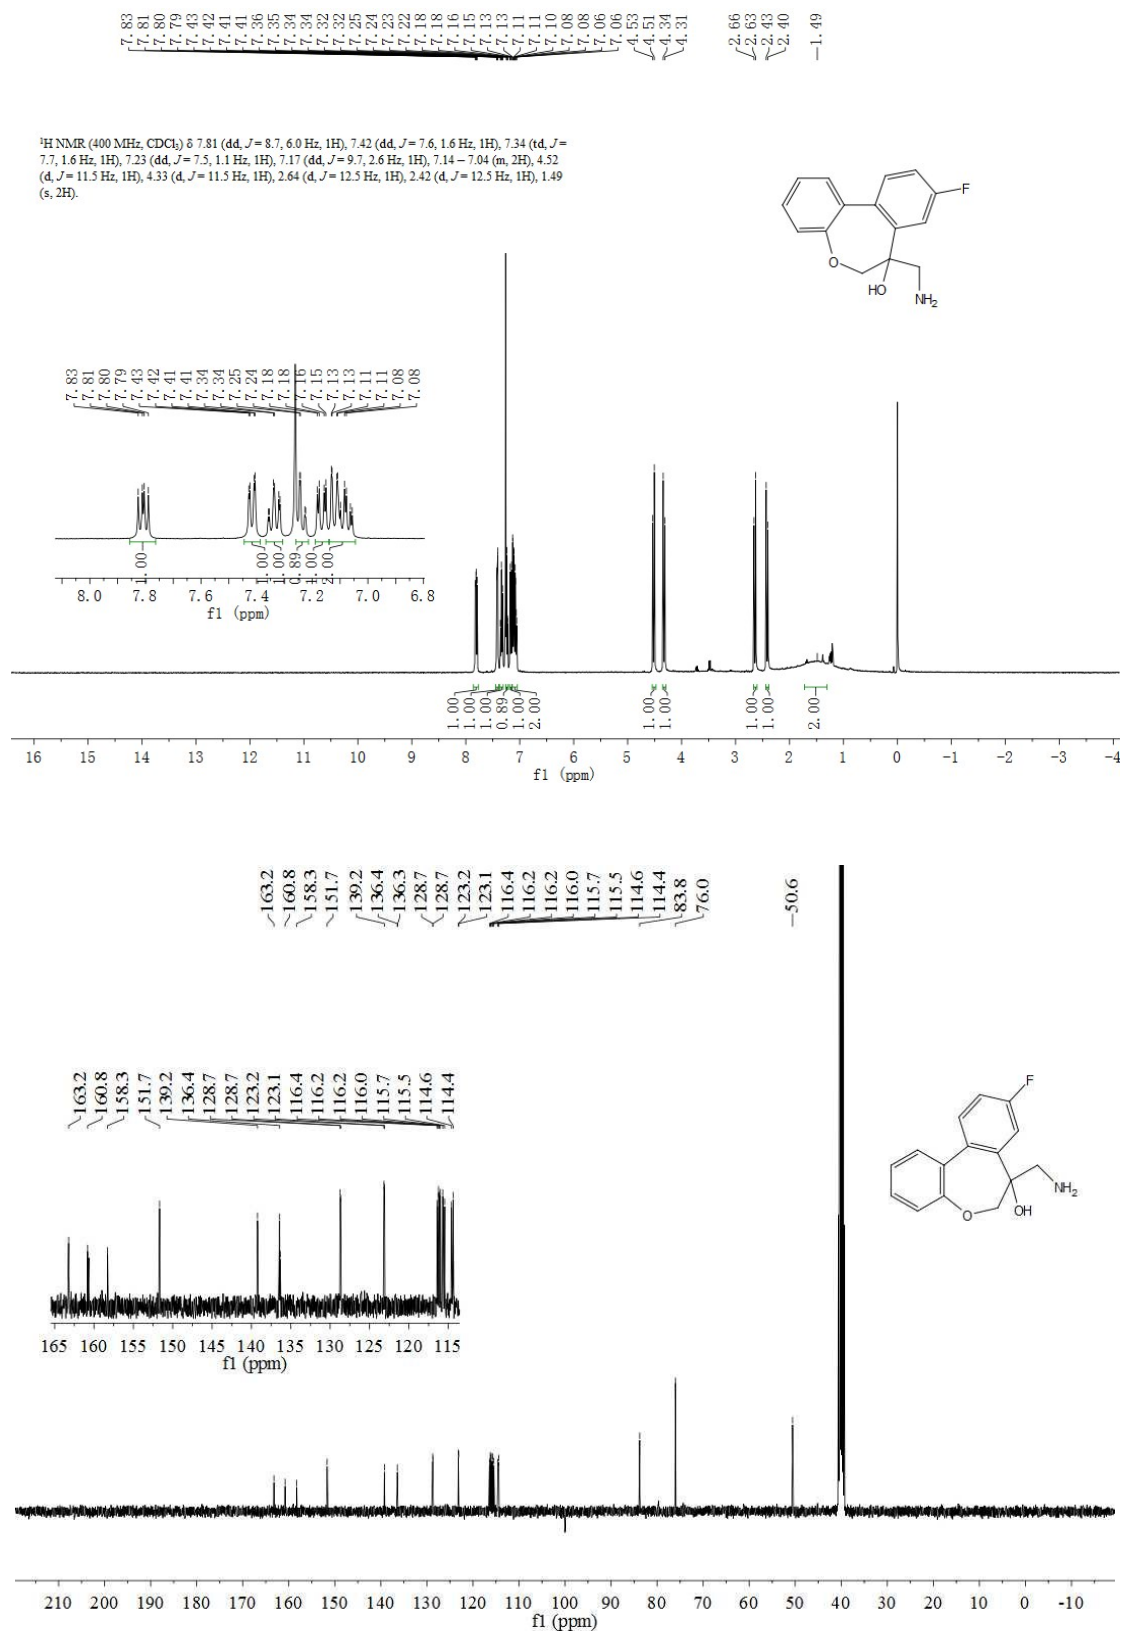

Fig. S64 NMR spectra of **6h**

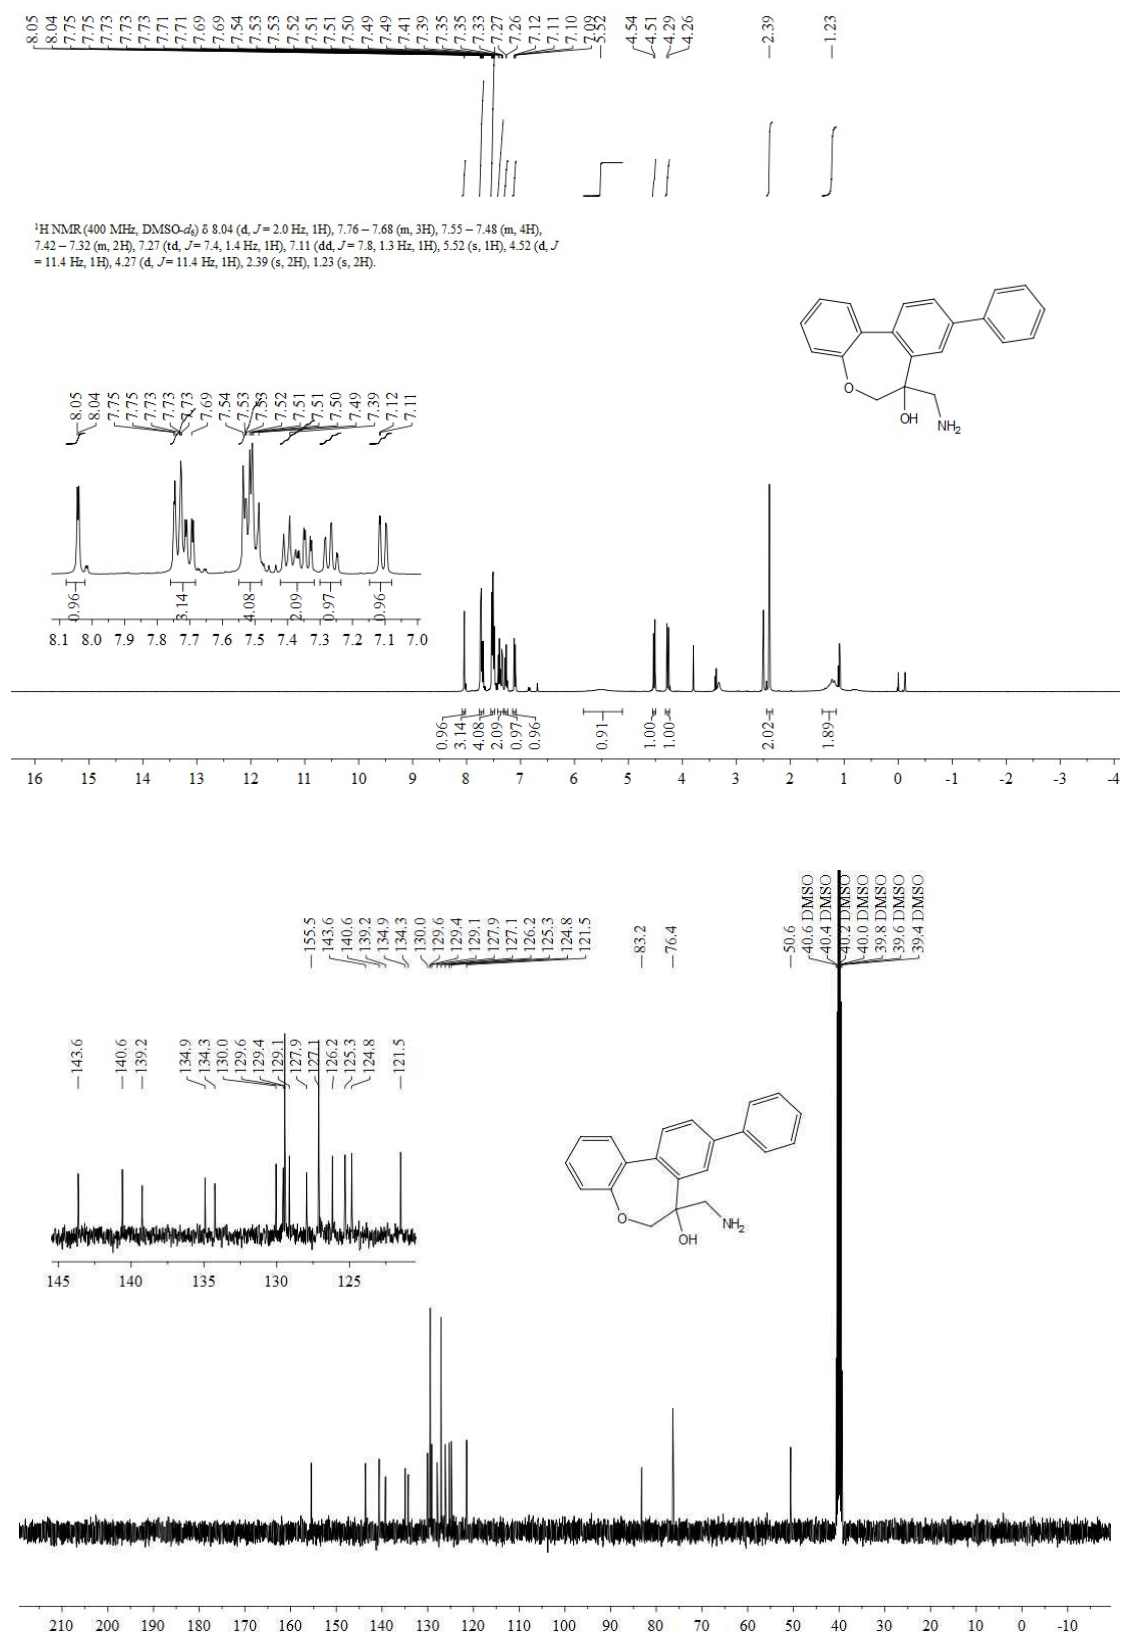

Fig. S65 NMR spectra of **6i**

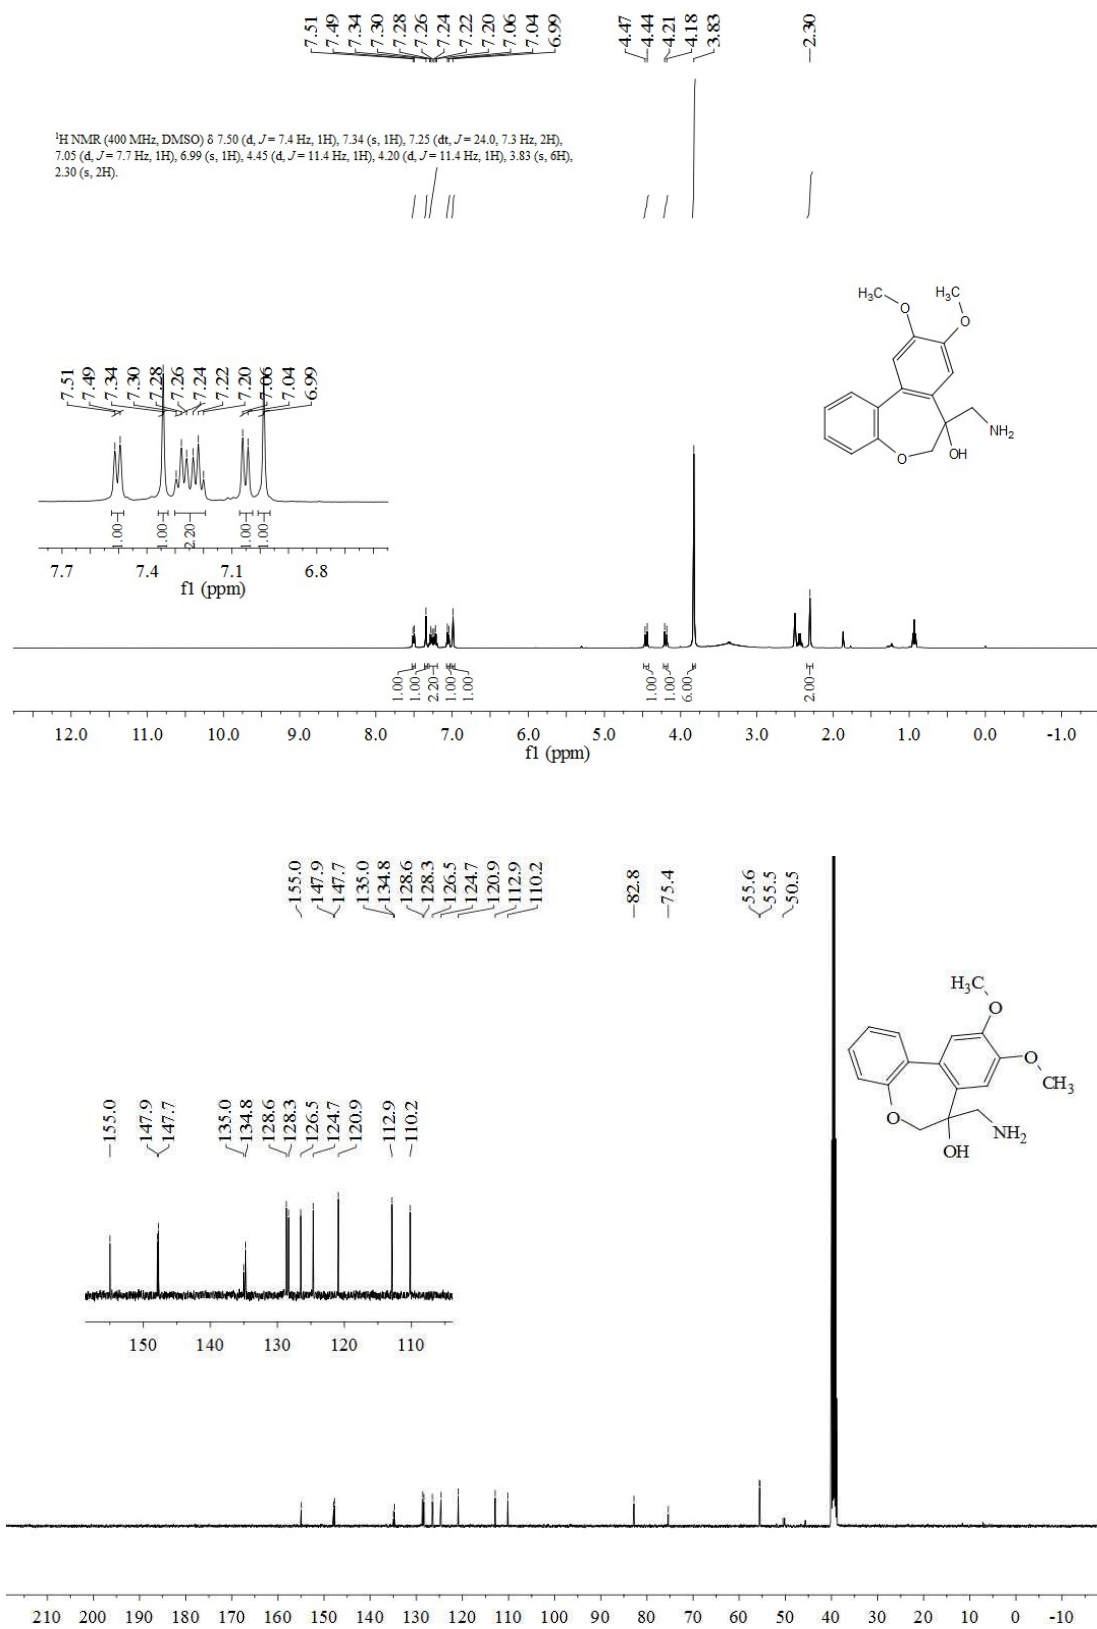

Fig. S66 NMR spectra of **6j**



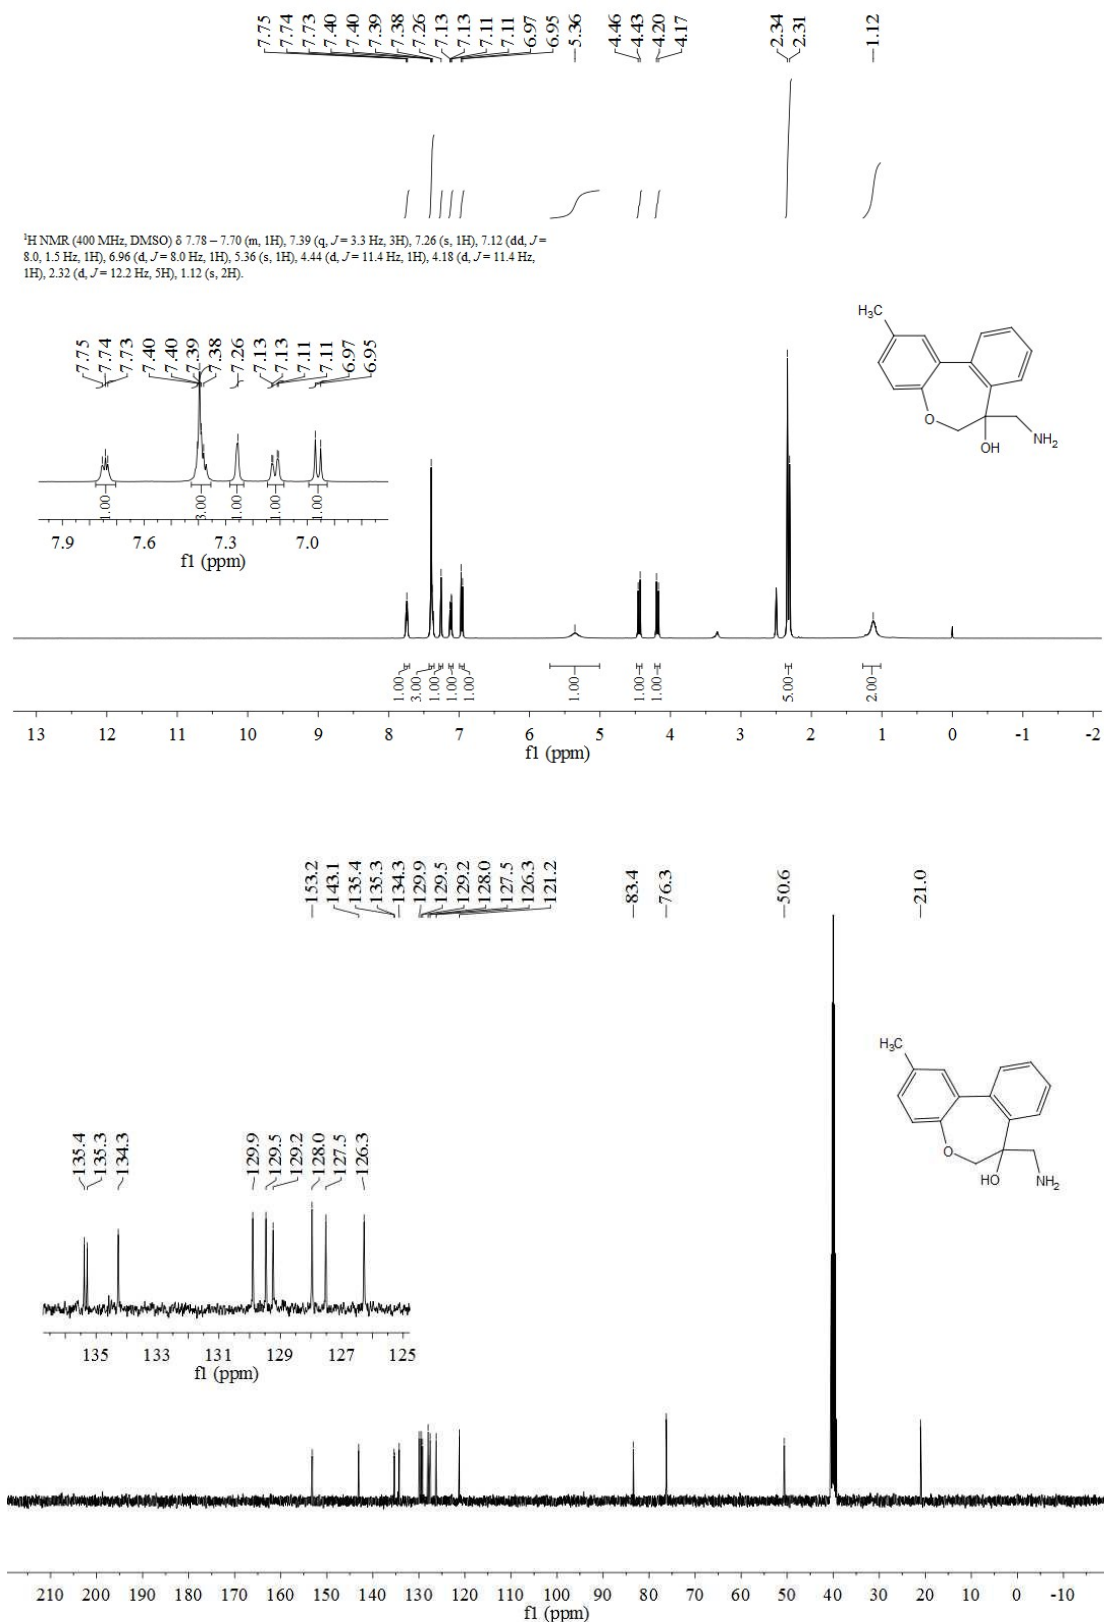

Fig. S67 NMR spectra of **6k**

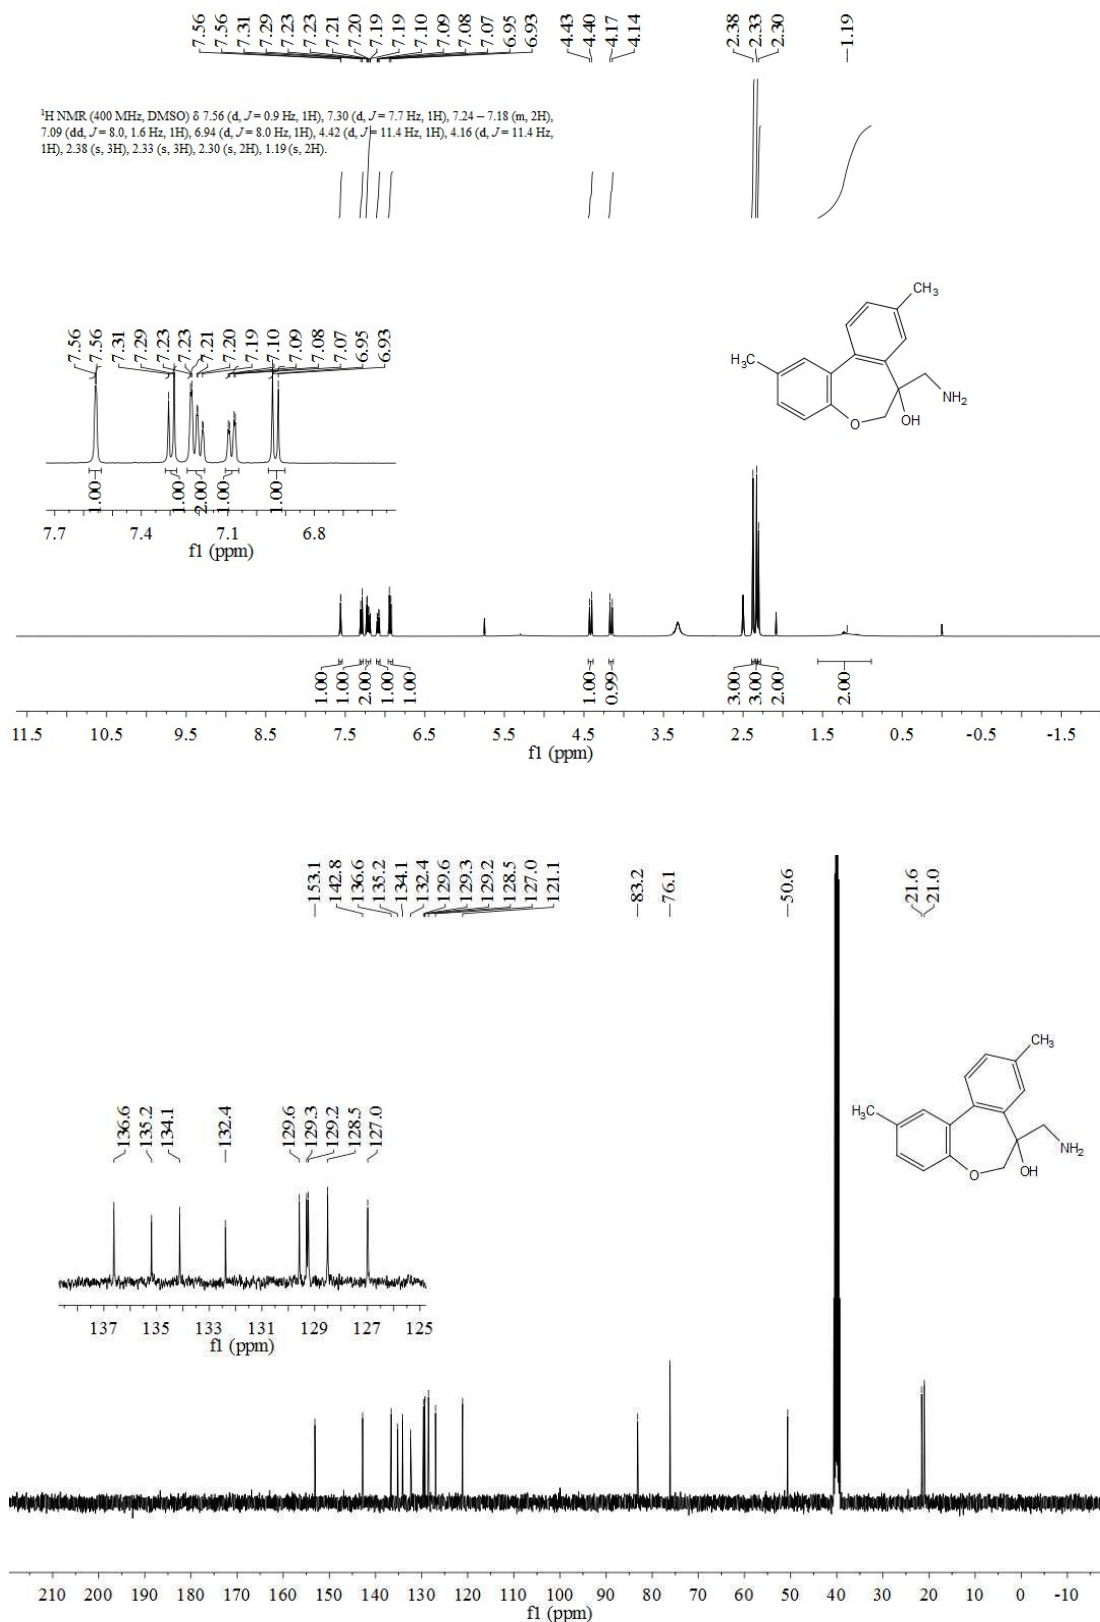

Fig. S68 NMR spectra of **61**

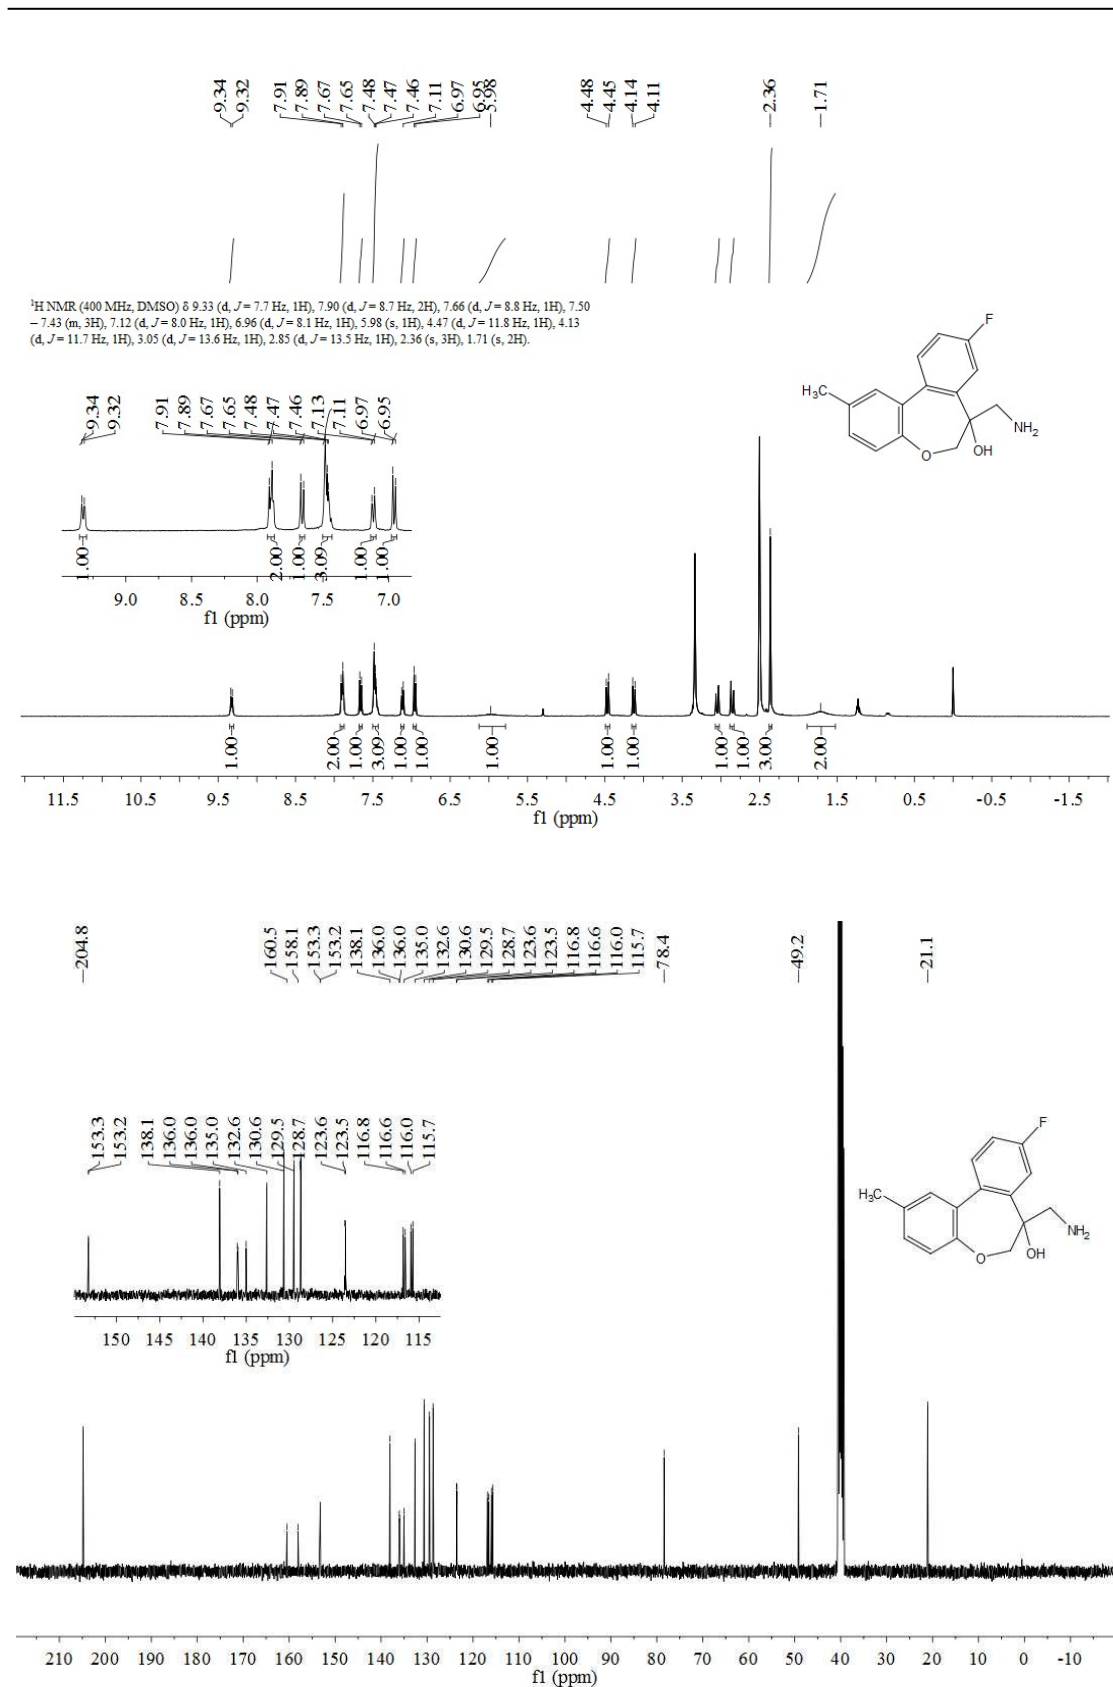

Fig. S69 NMR spectra of **6m**

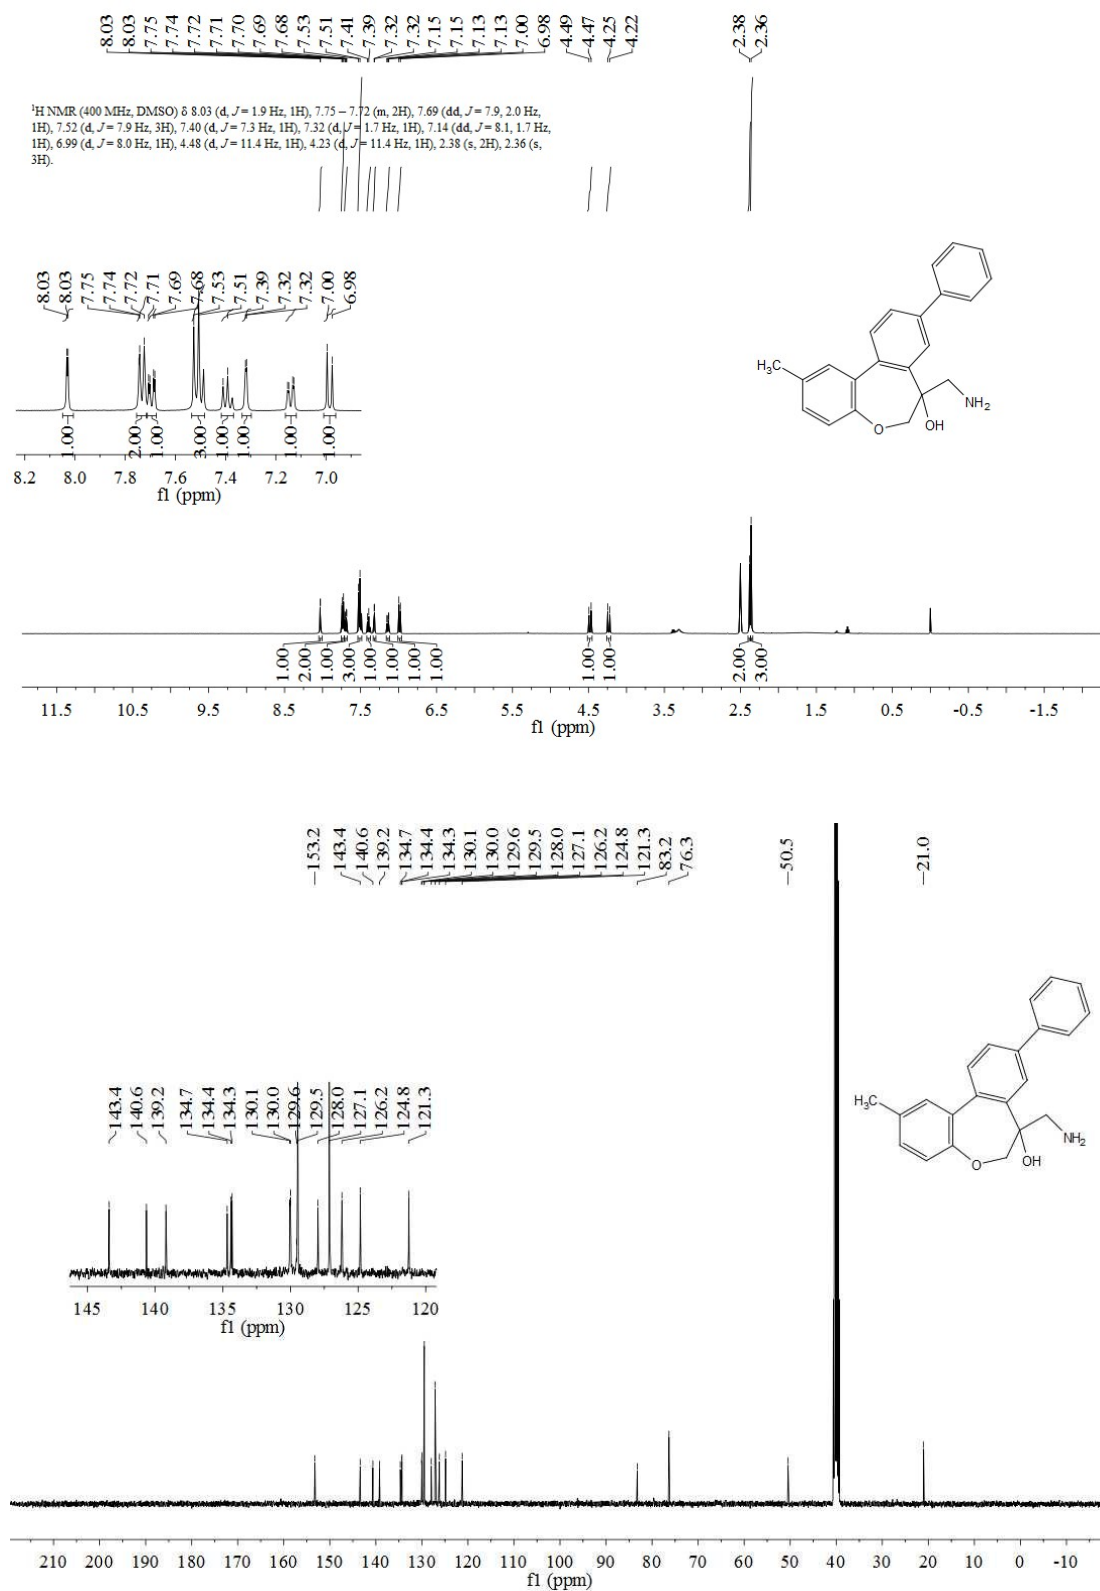

Fig. S70 NMR spectra of **6n**

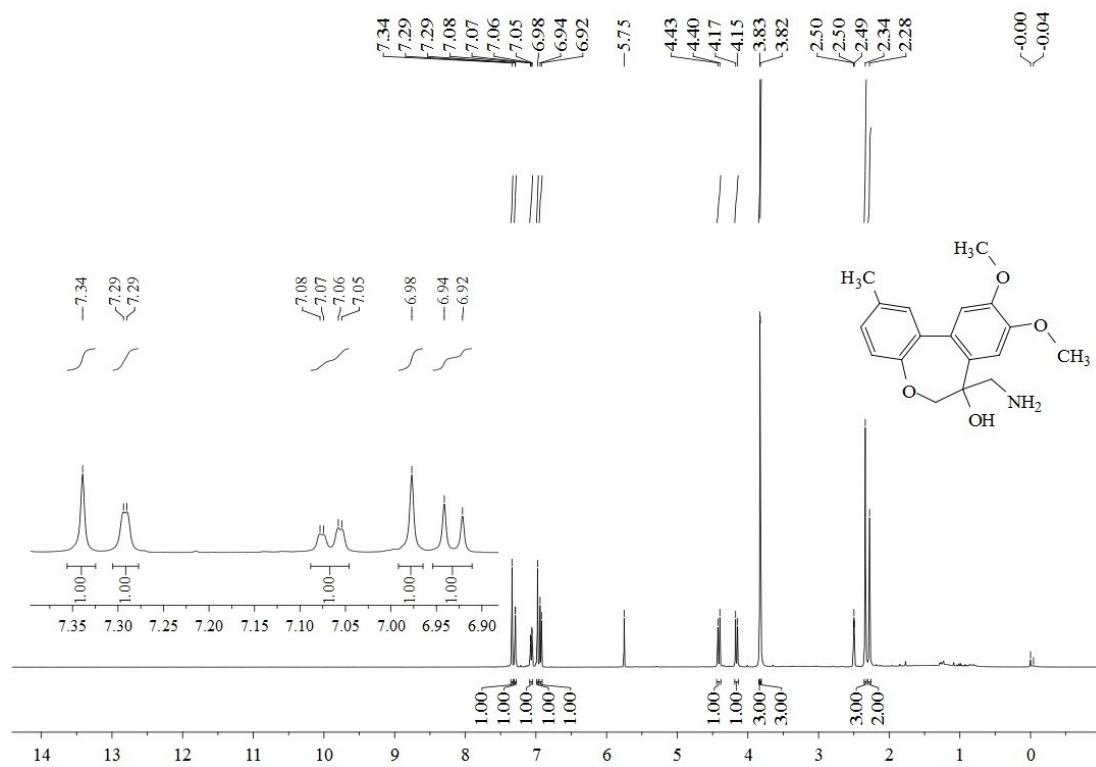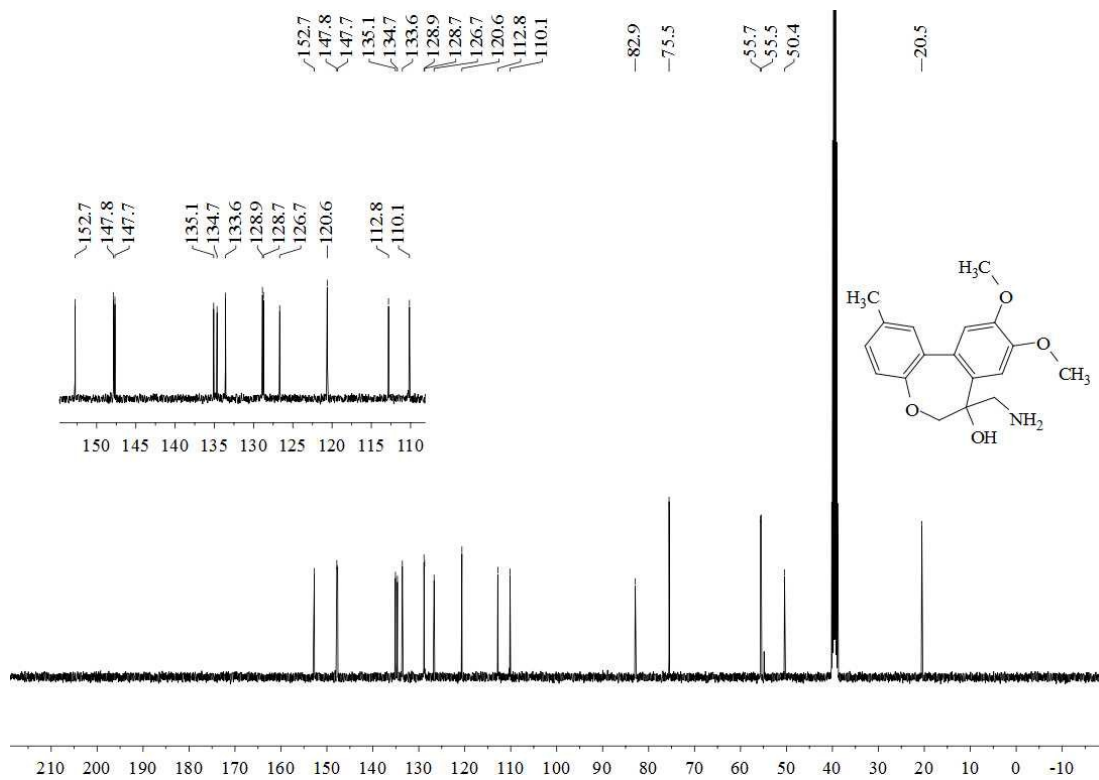

Fig. S71 NMR spectra of **60**

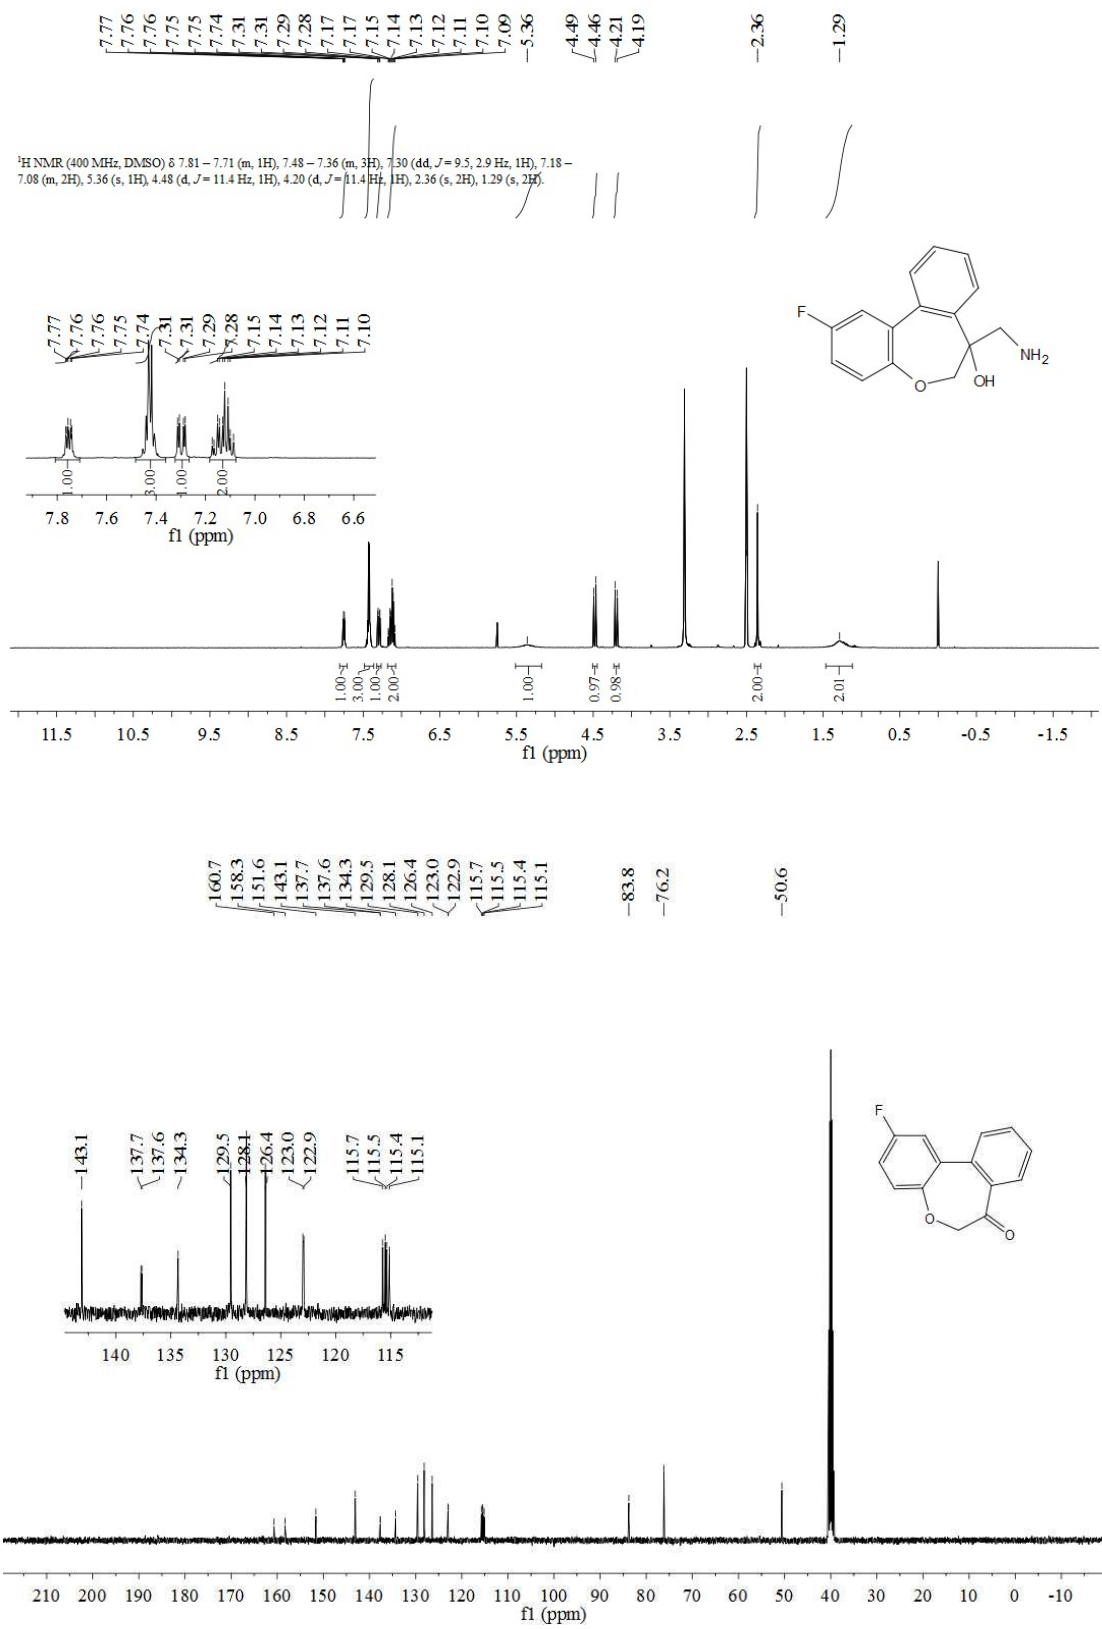

Fig. S72 NMR spectra of 6p

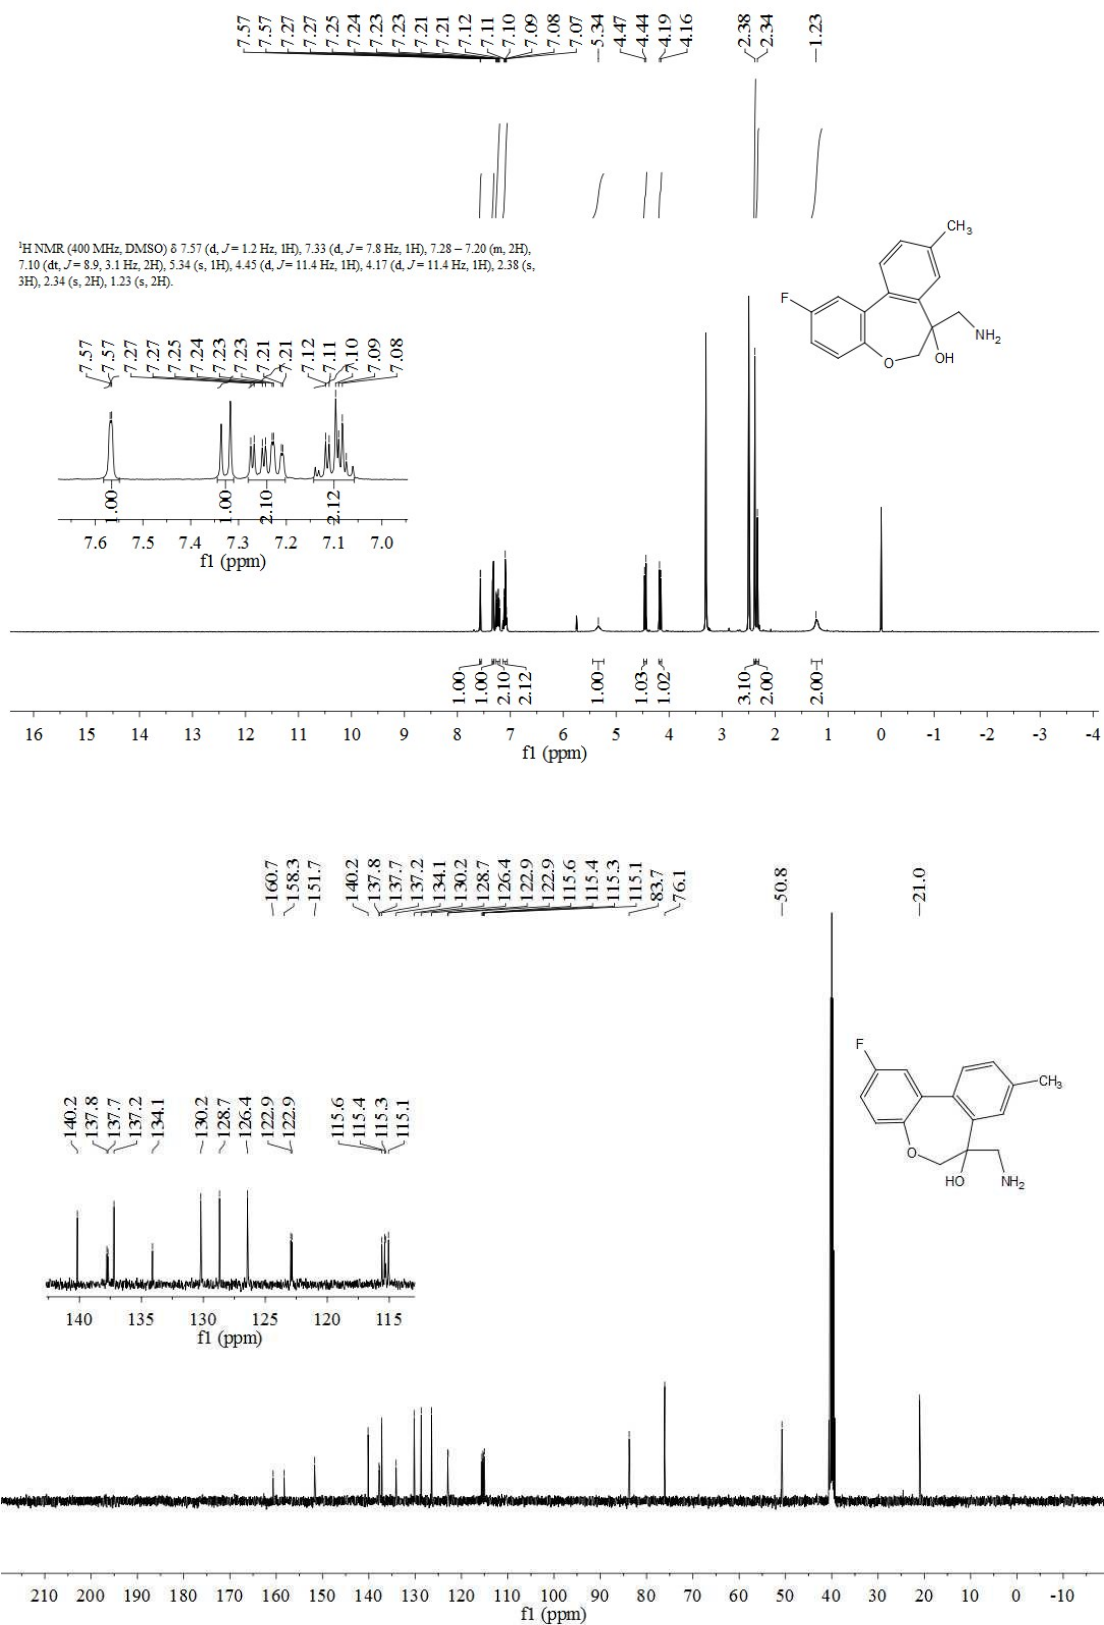

Fig. S73 NMR spectra of **6q**

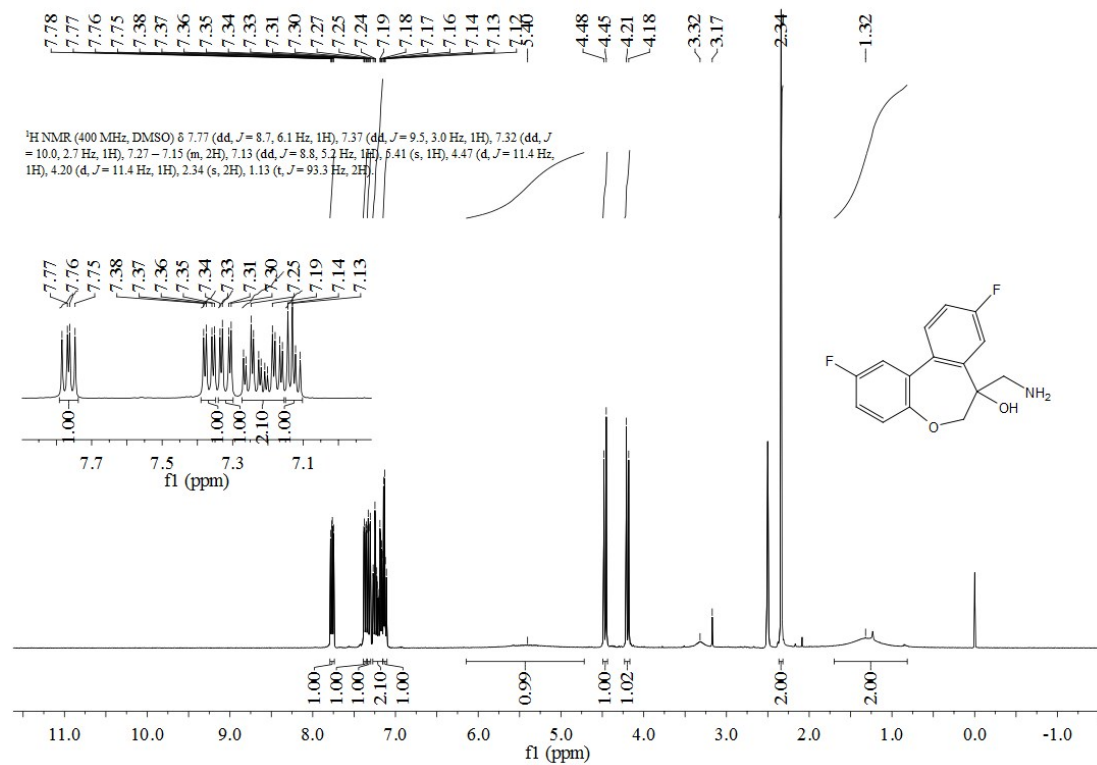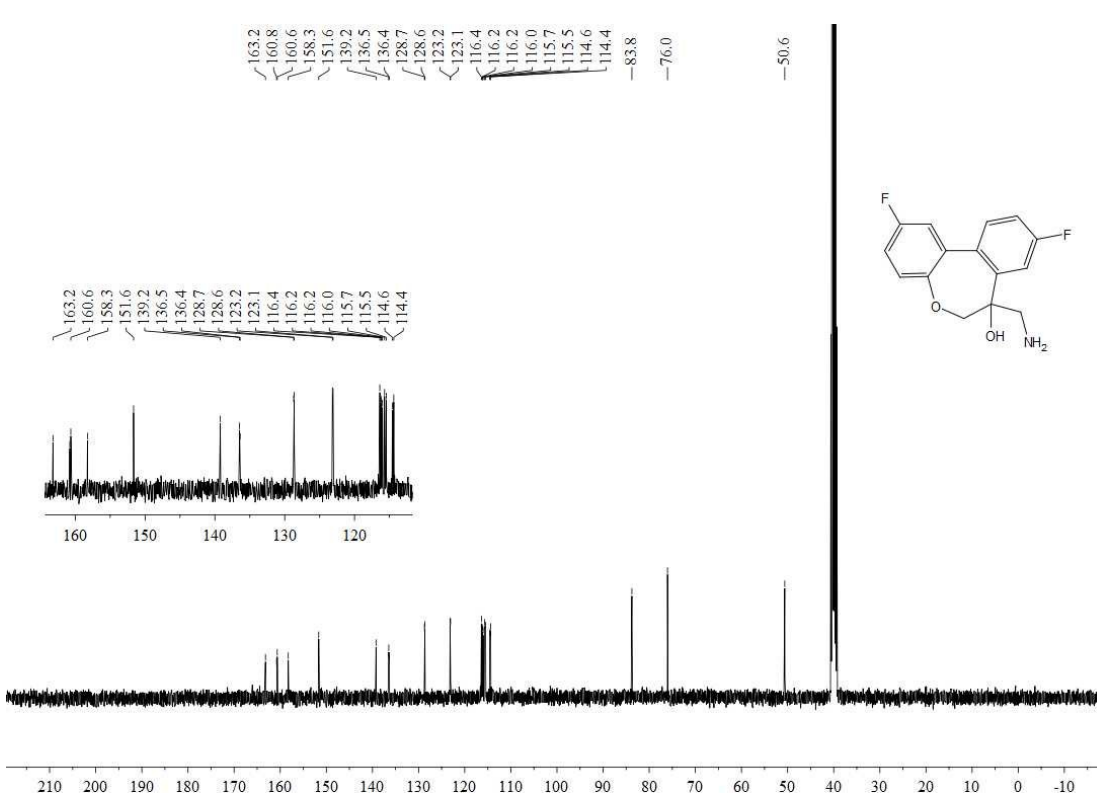

Fig. S74 NMR spectra of 6r



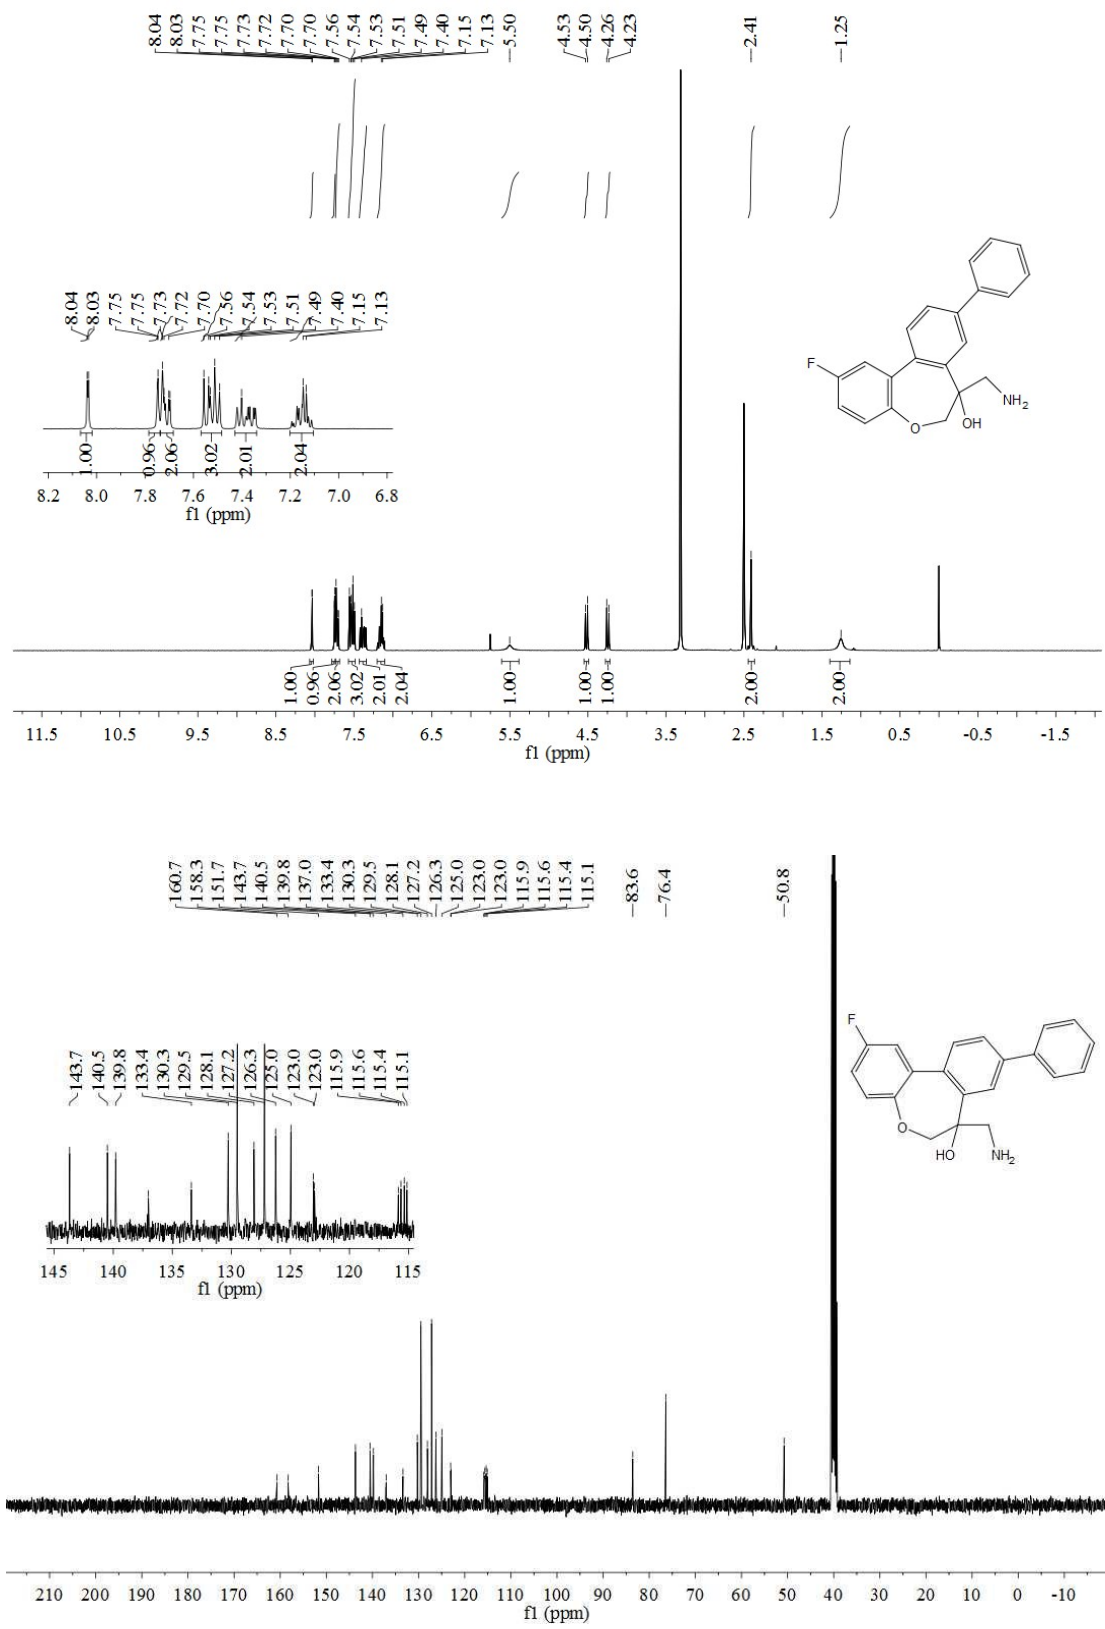

Fig. S75 NMR spectra of **6s**

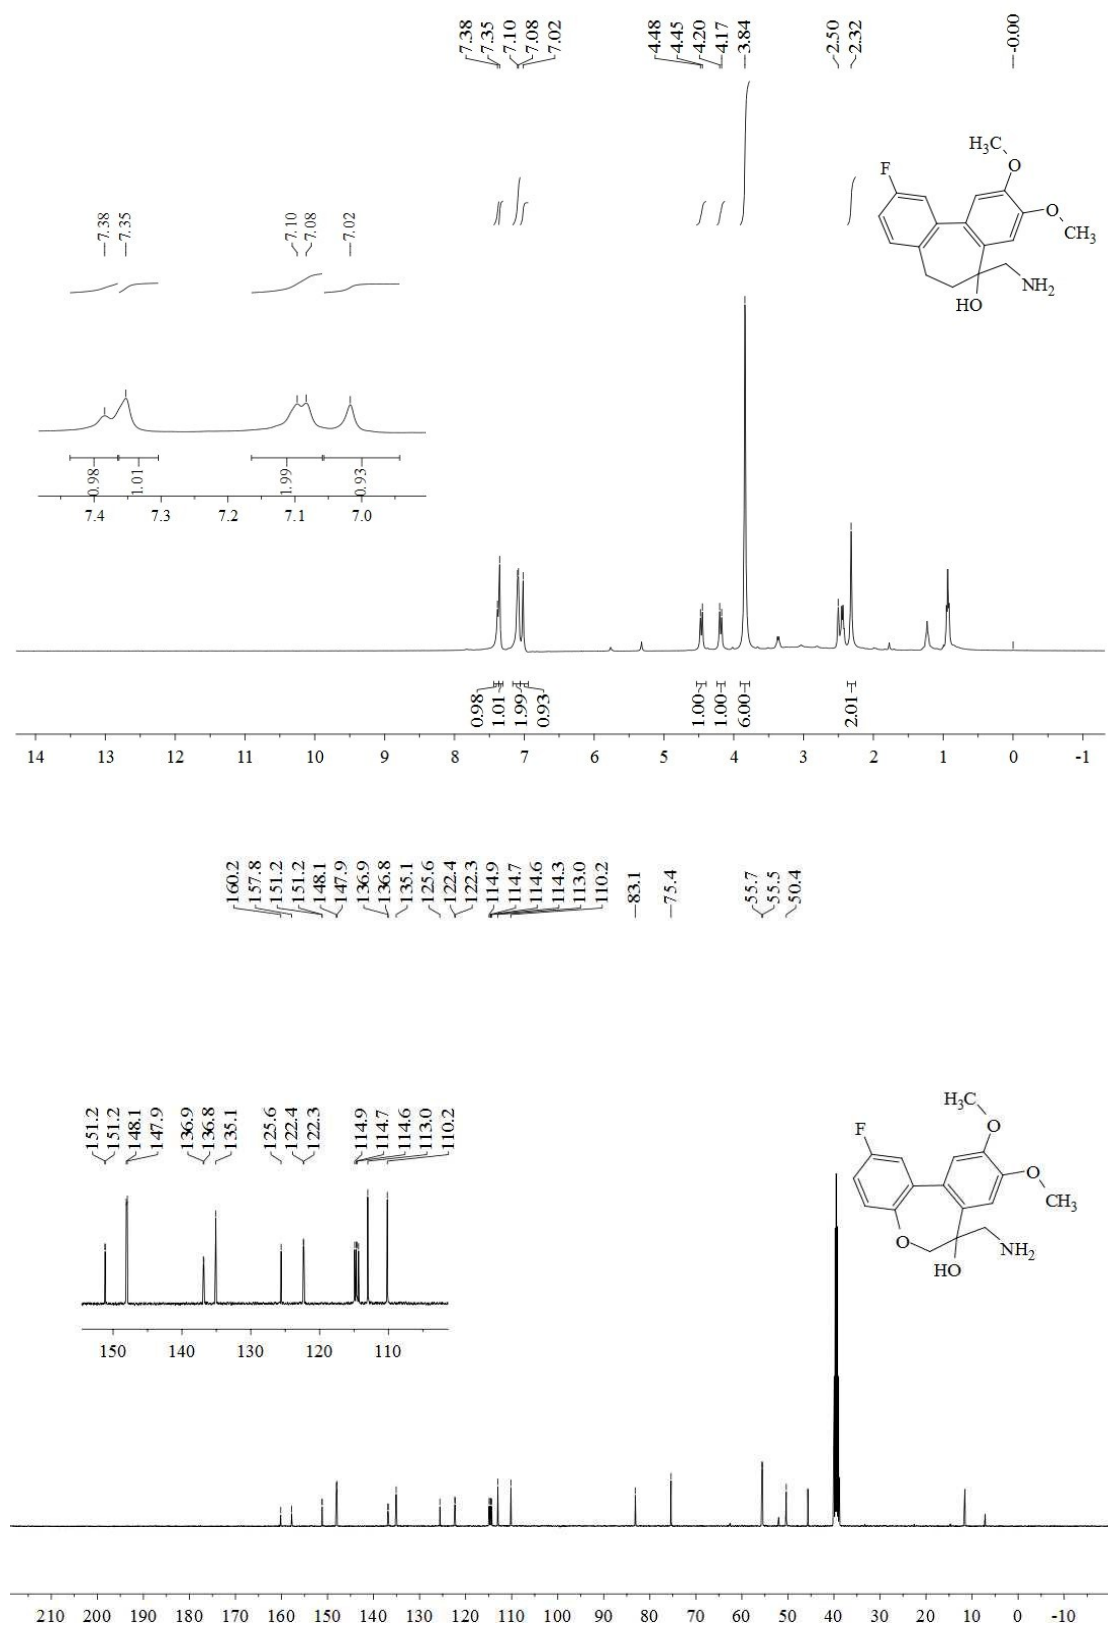

Fig. S76 NMR spectra of **6t**

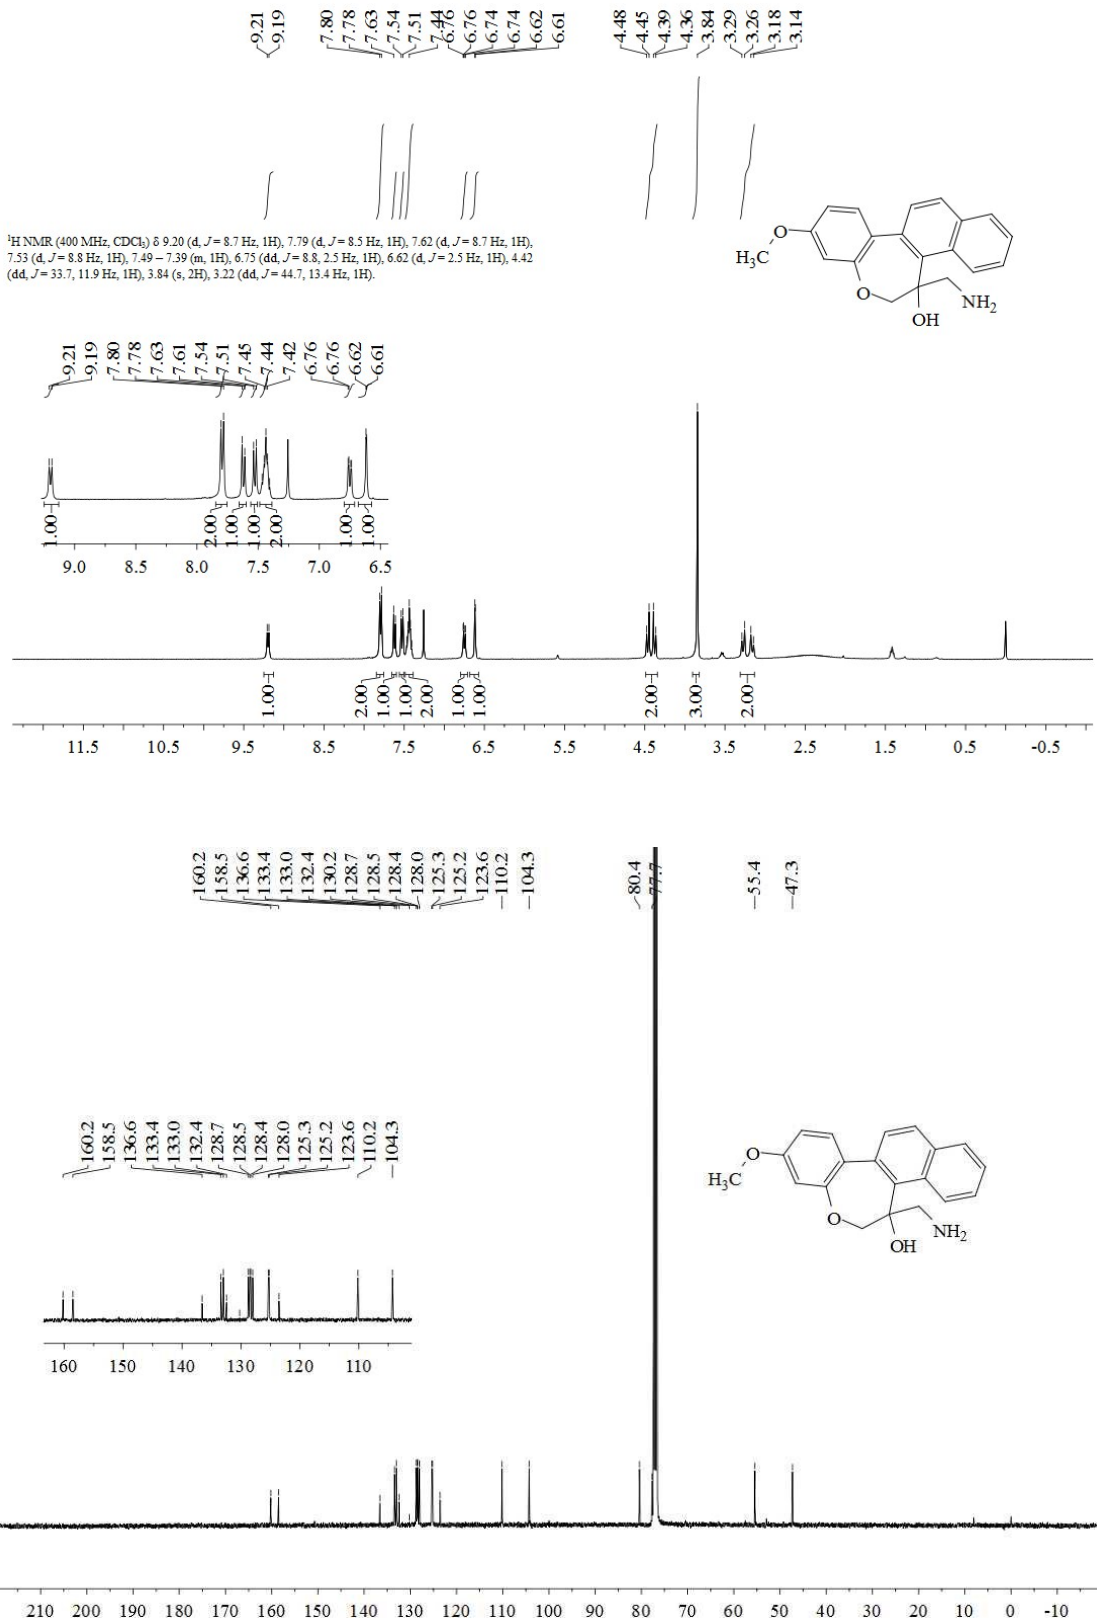

Fig. S77 NMR spectra of **6u**

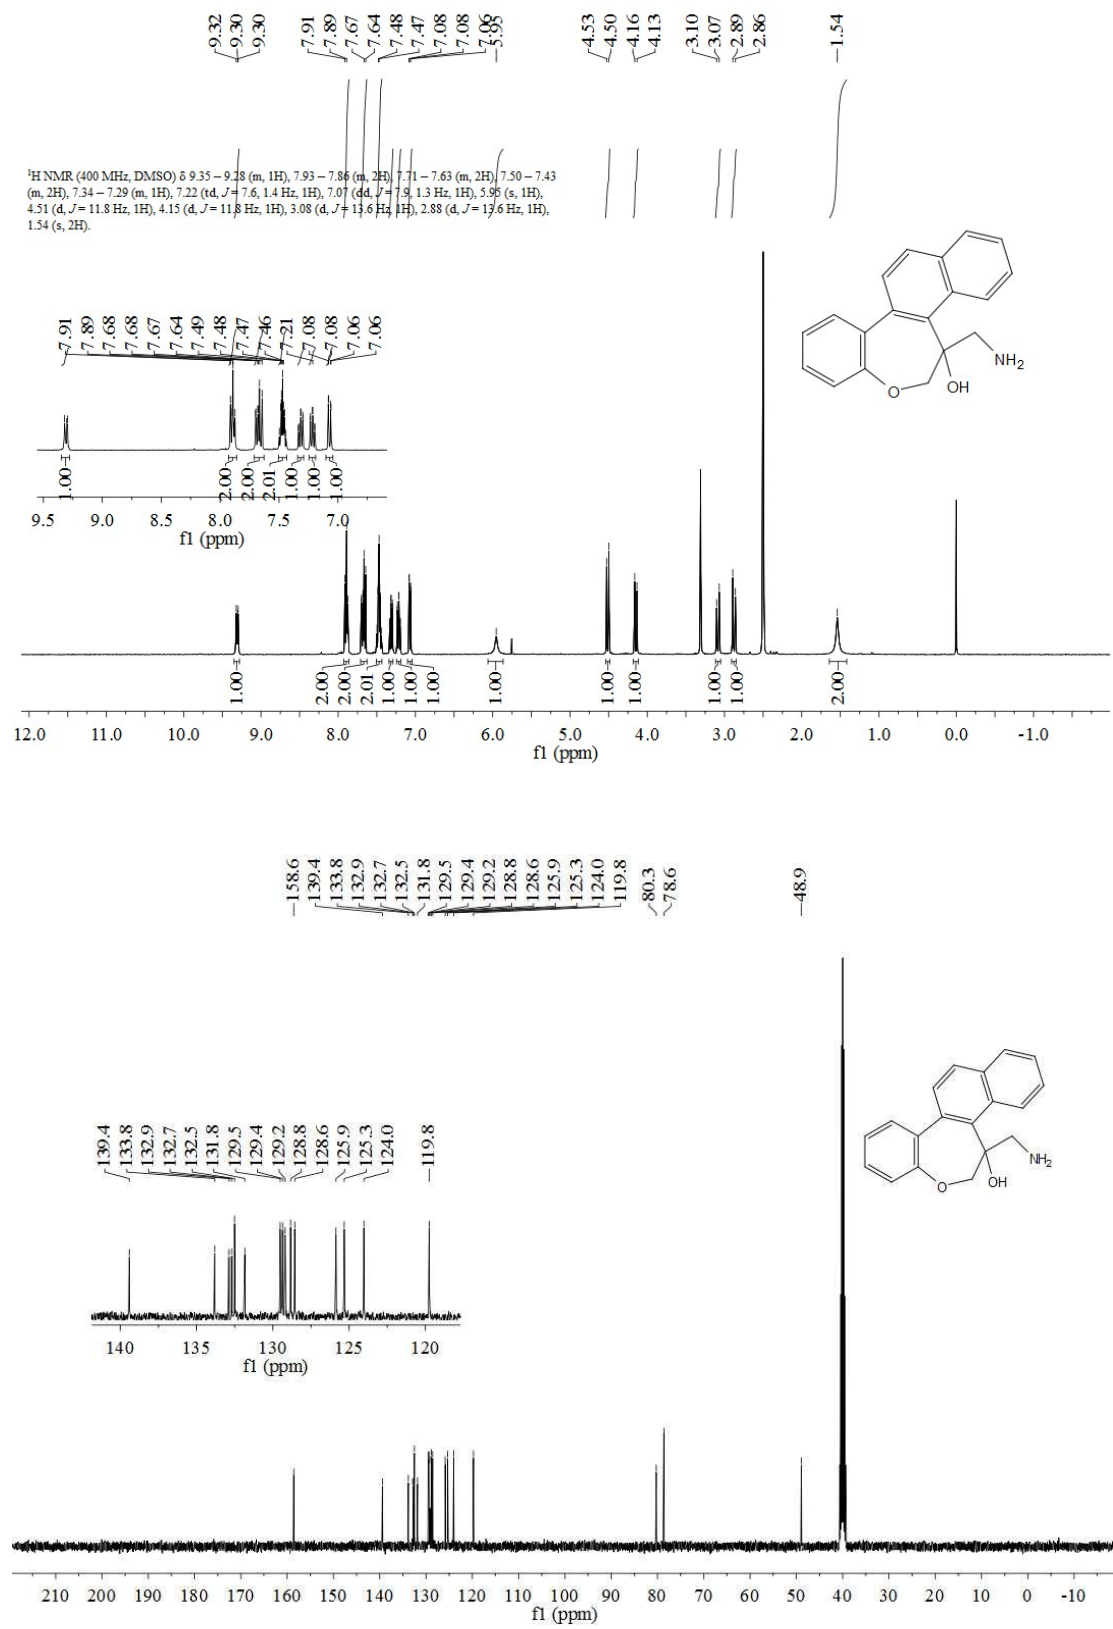

Fig. S78 NMR spectra of **6v**

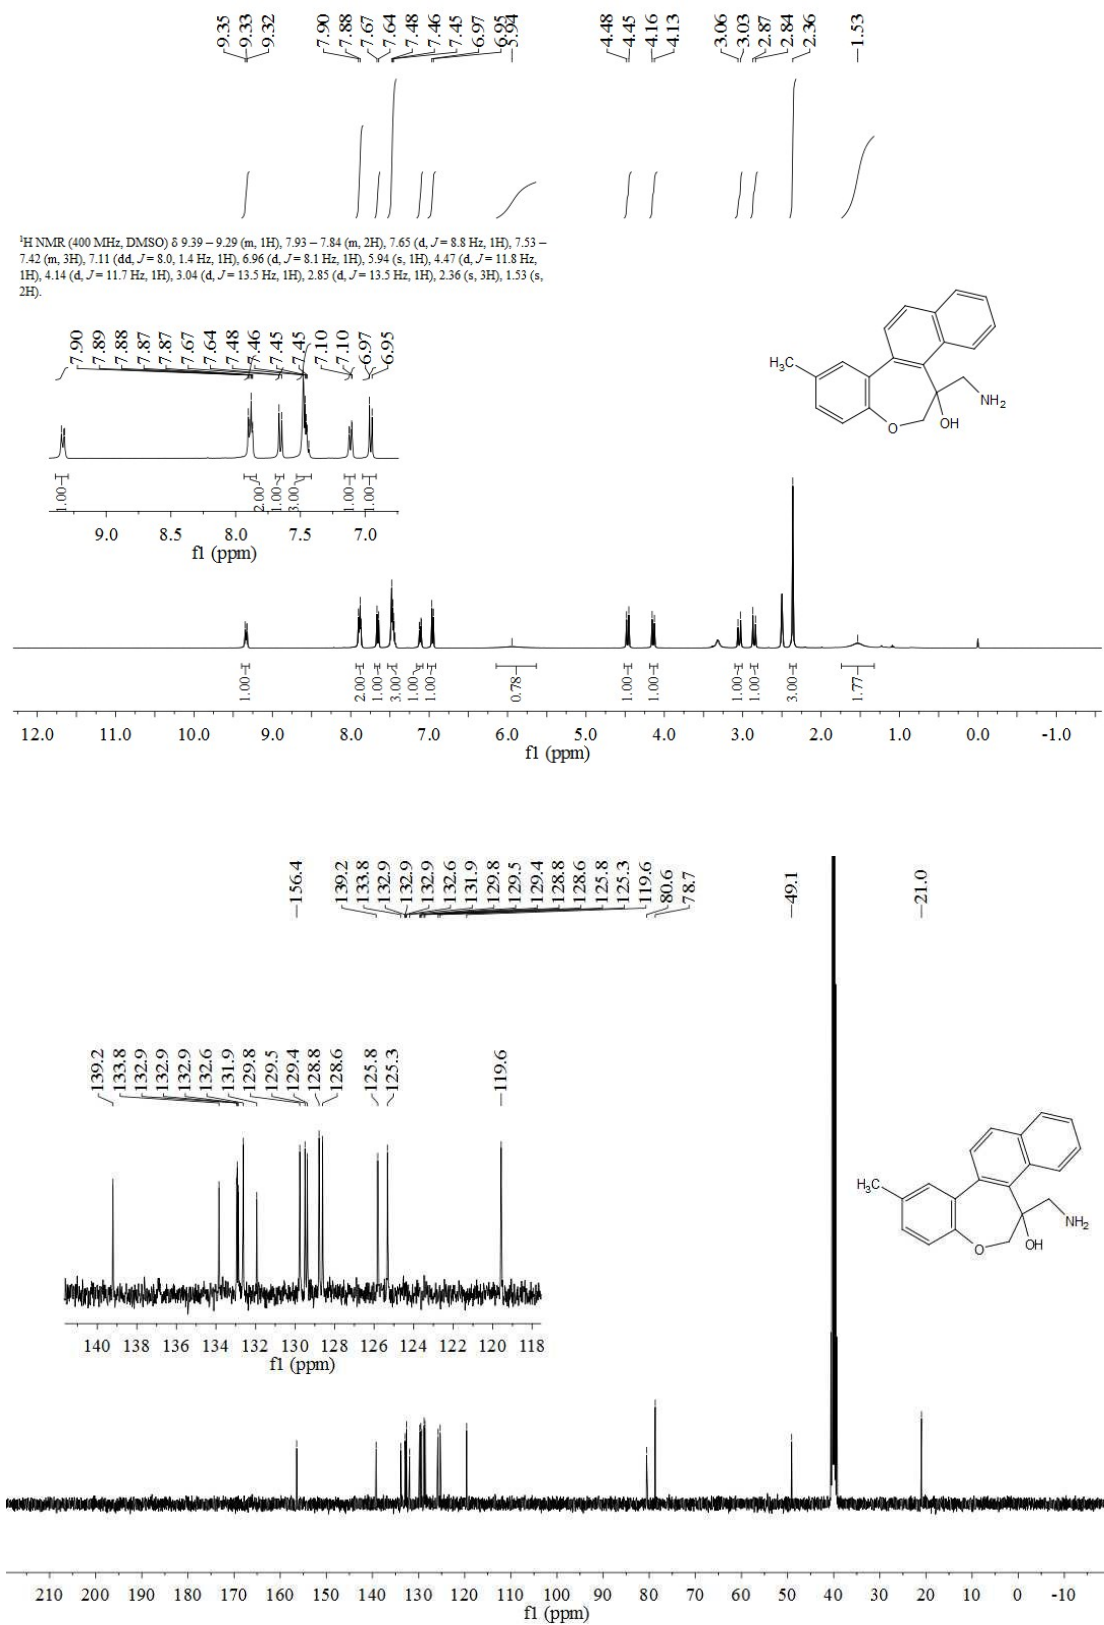

Fig. S79 NMR spectra of 6w

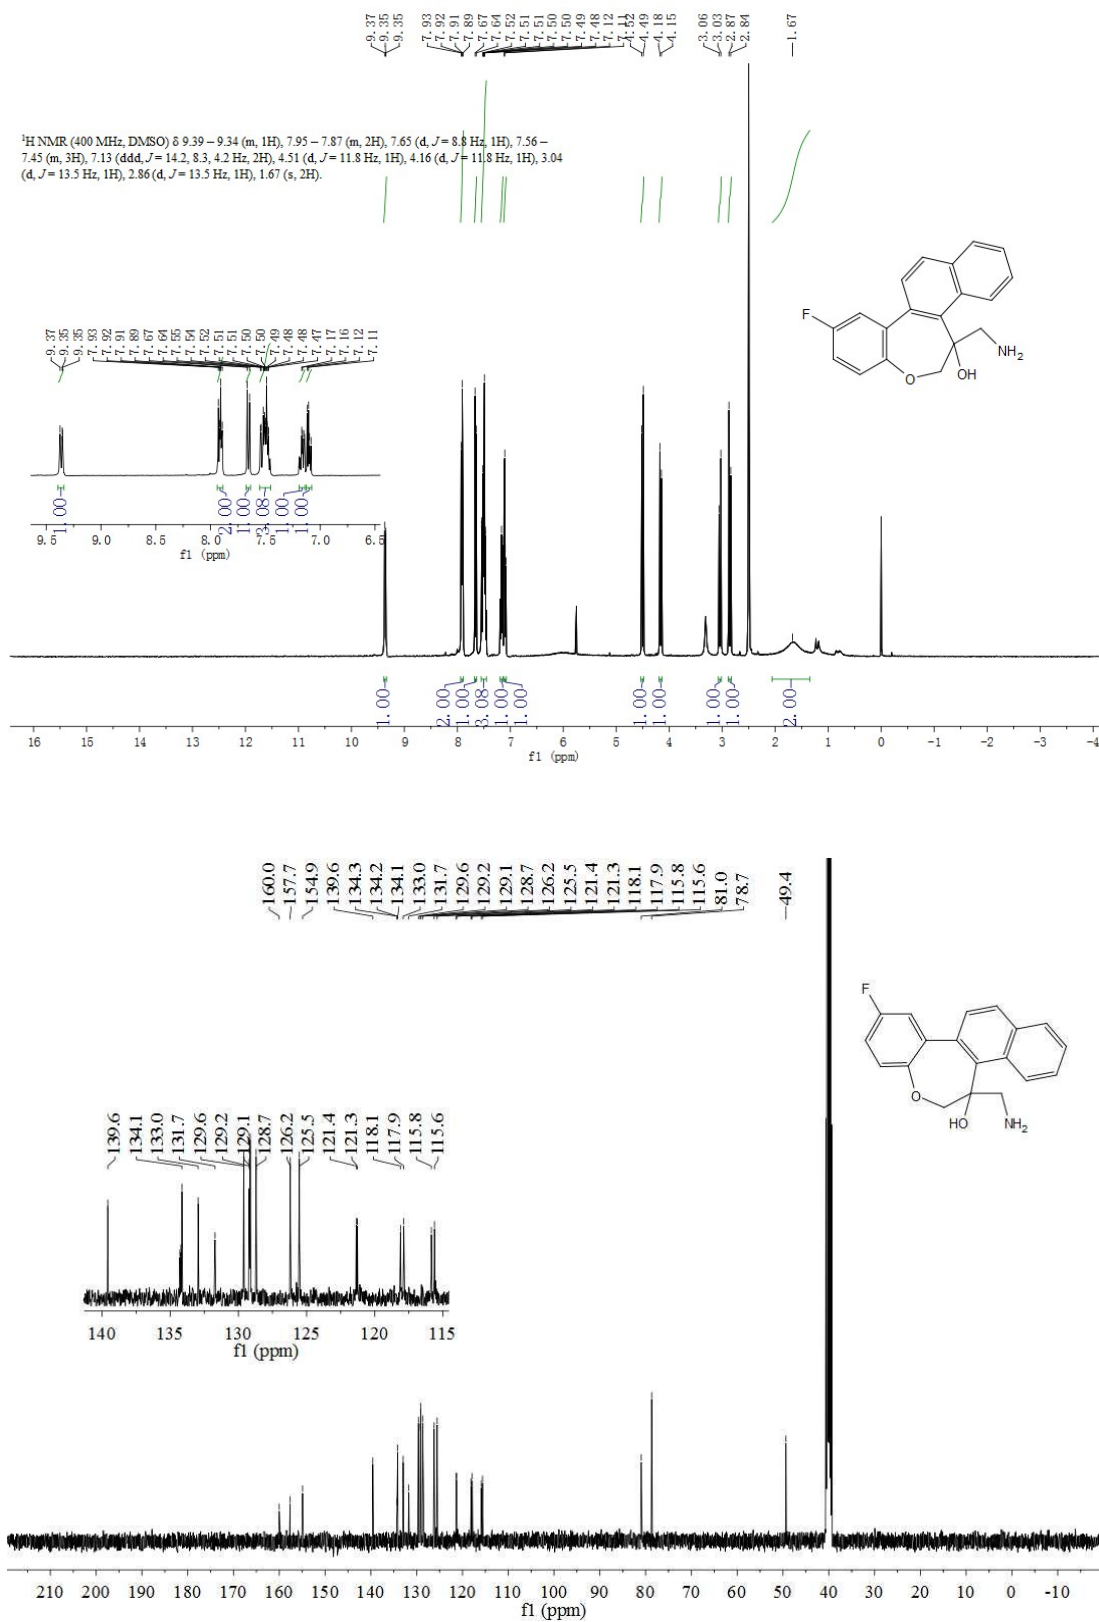

Fig. S80 NMR spectra of 6x

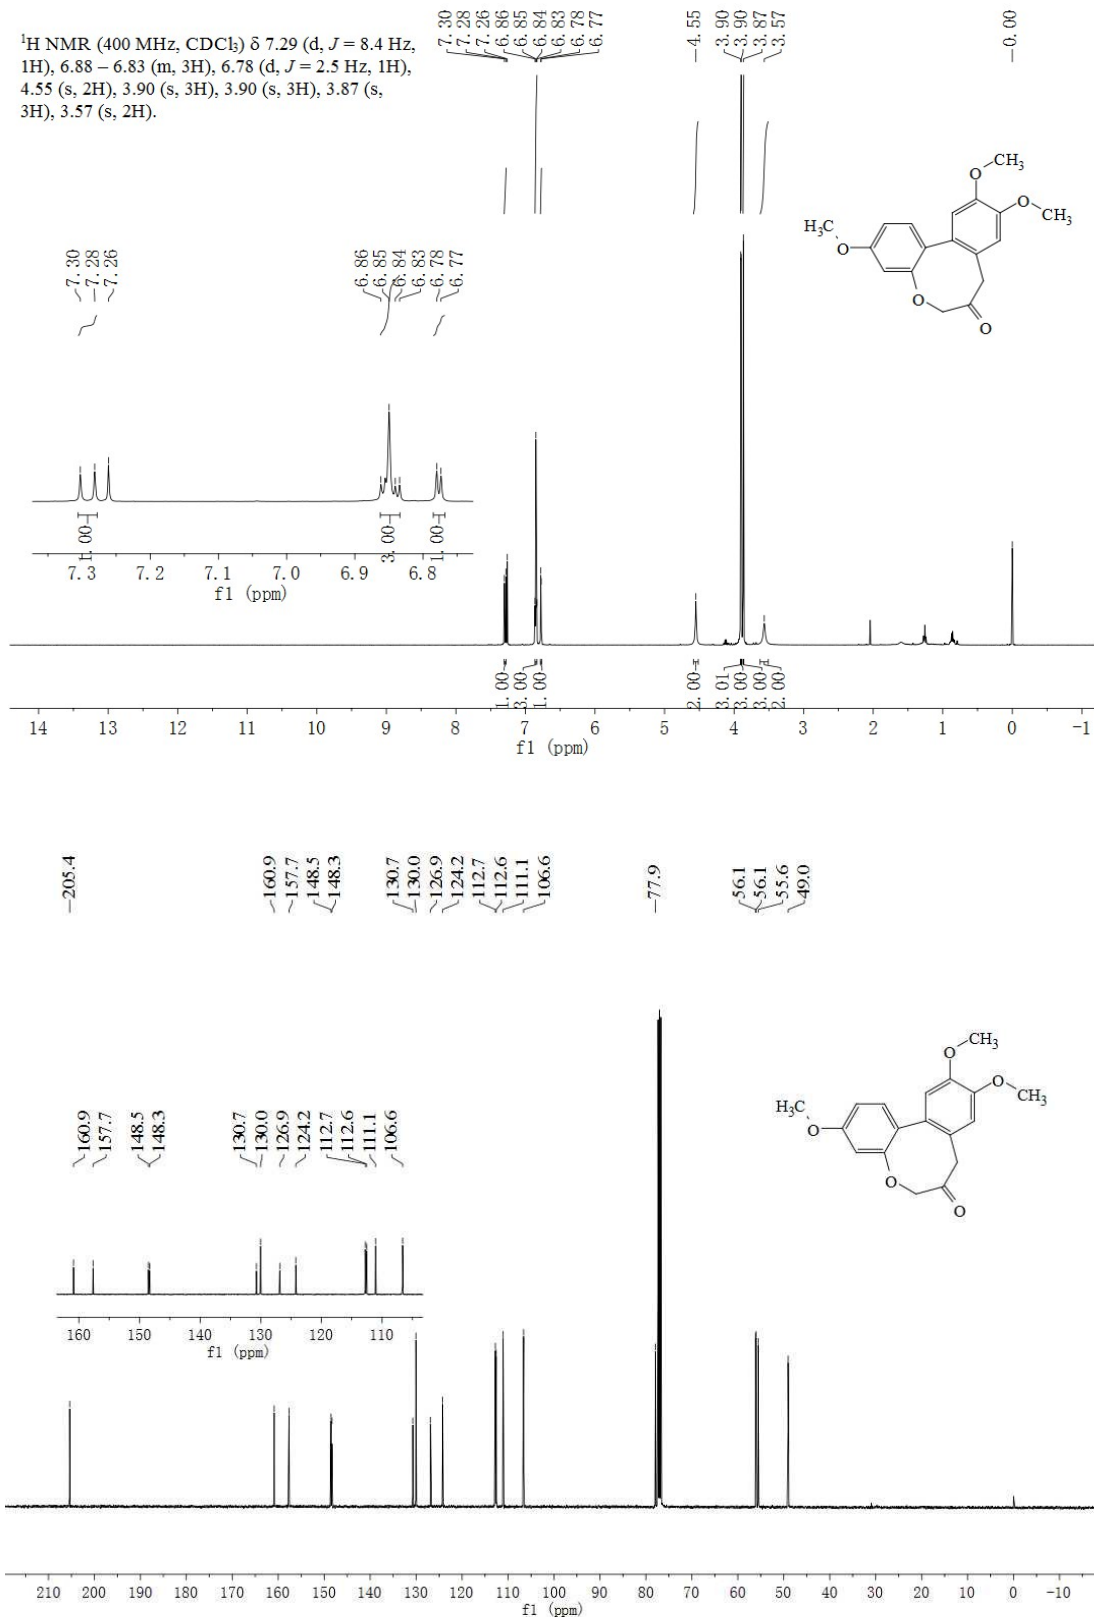

Fig. S81 NMR spectra of 7a

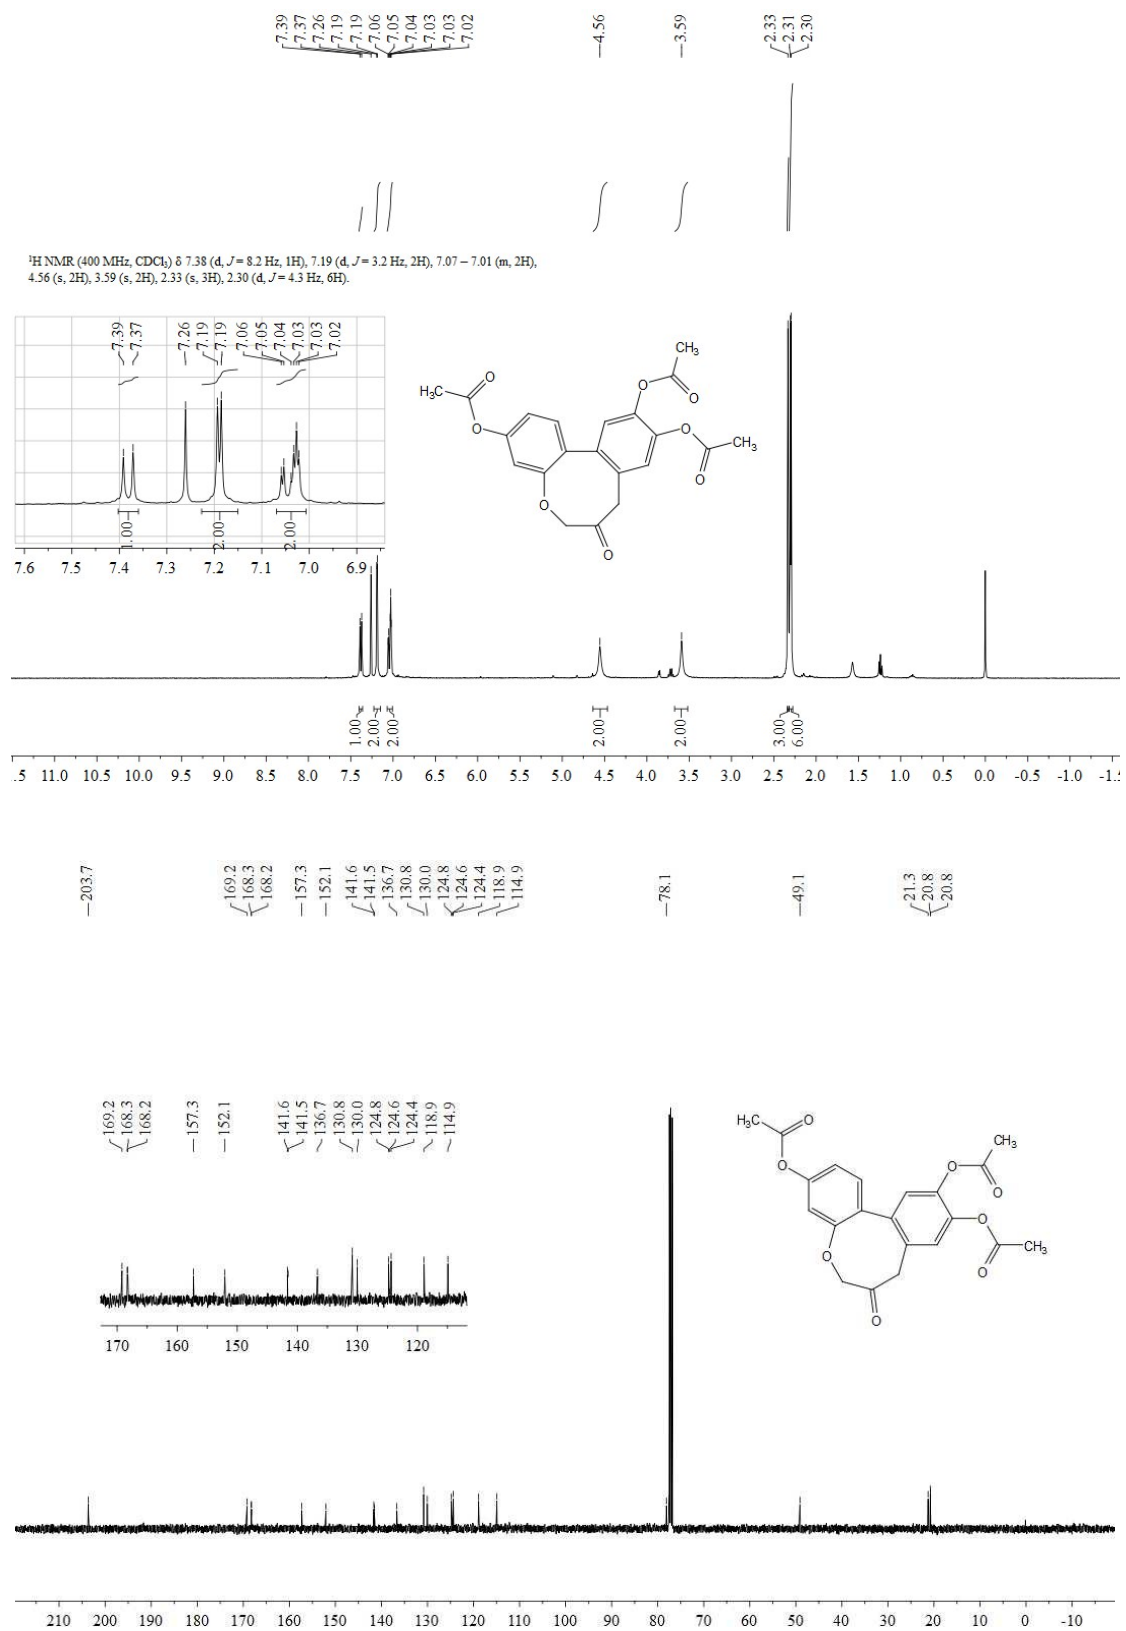

Fig. S82 NMR spectra of **7a<sub>1</sub>**



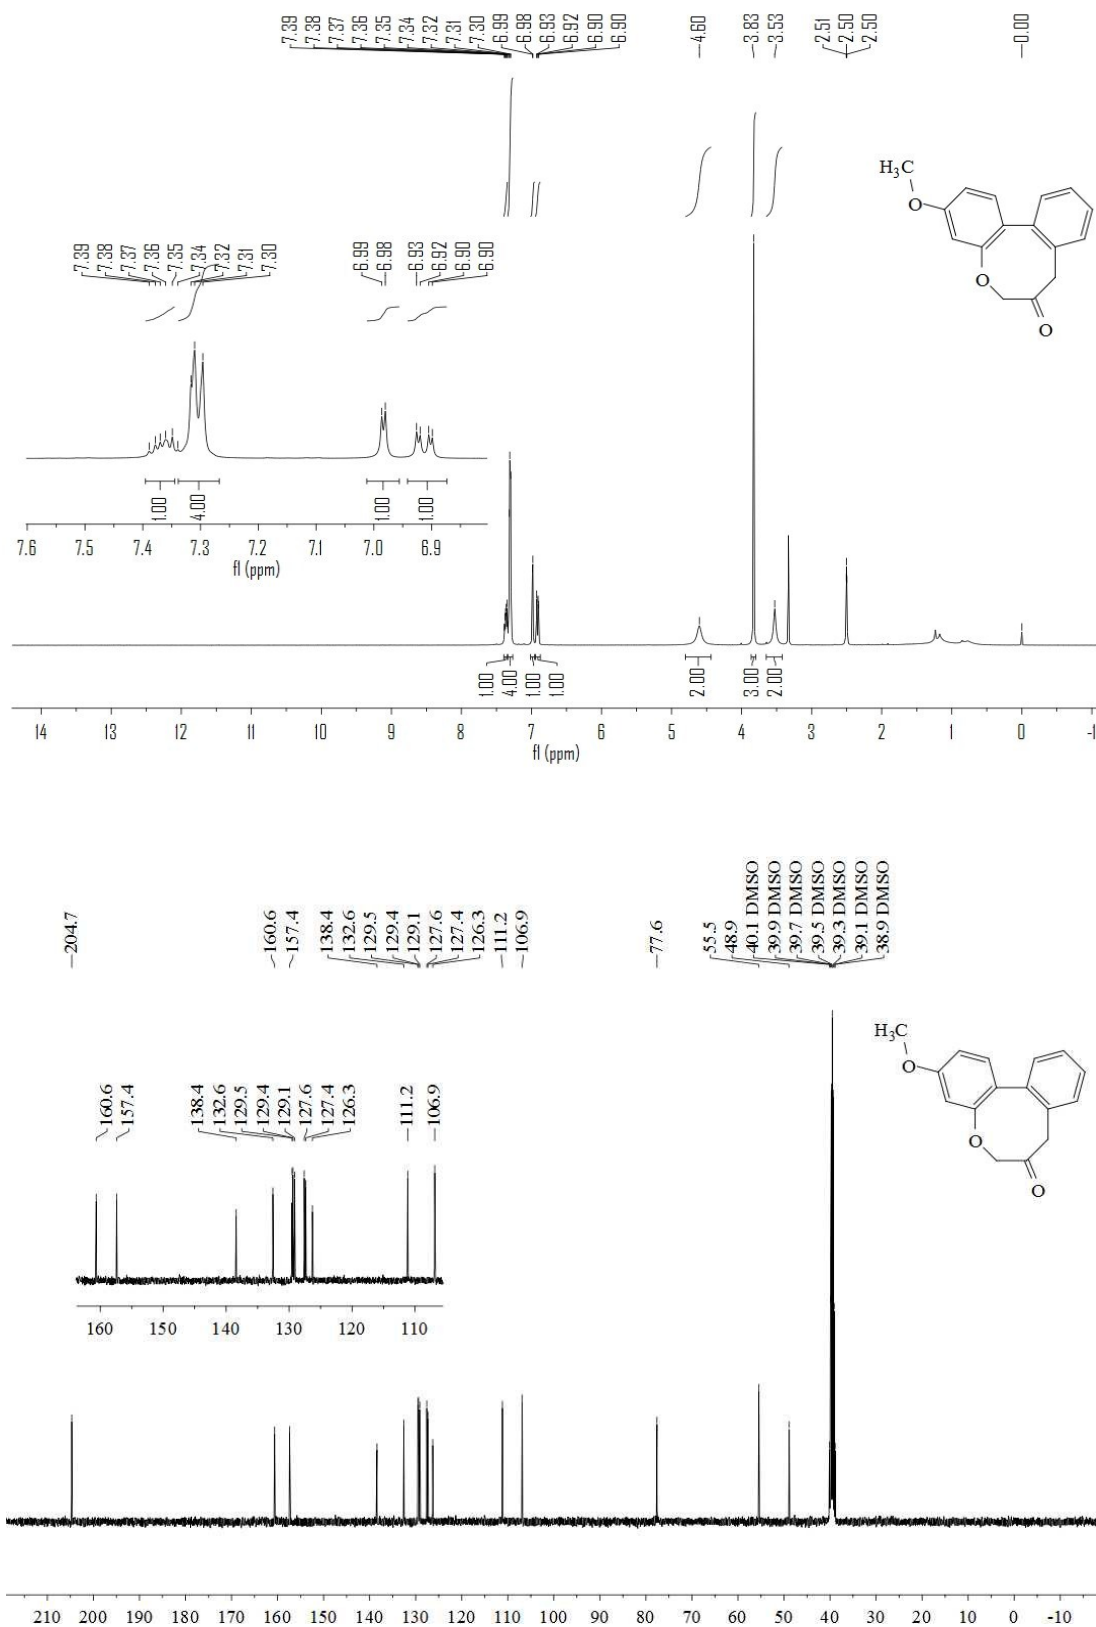

Fig. S83 NMR spectra of **7b**

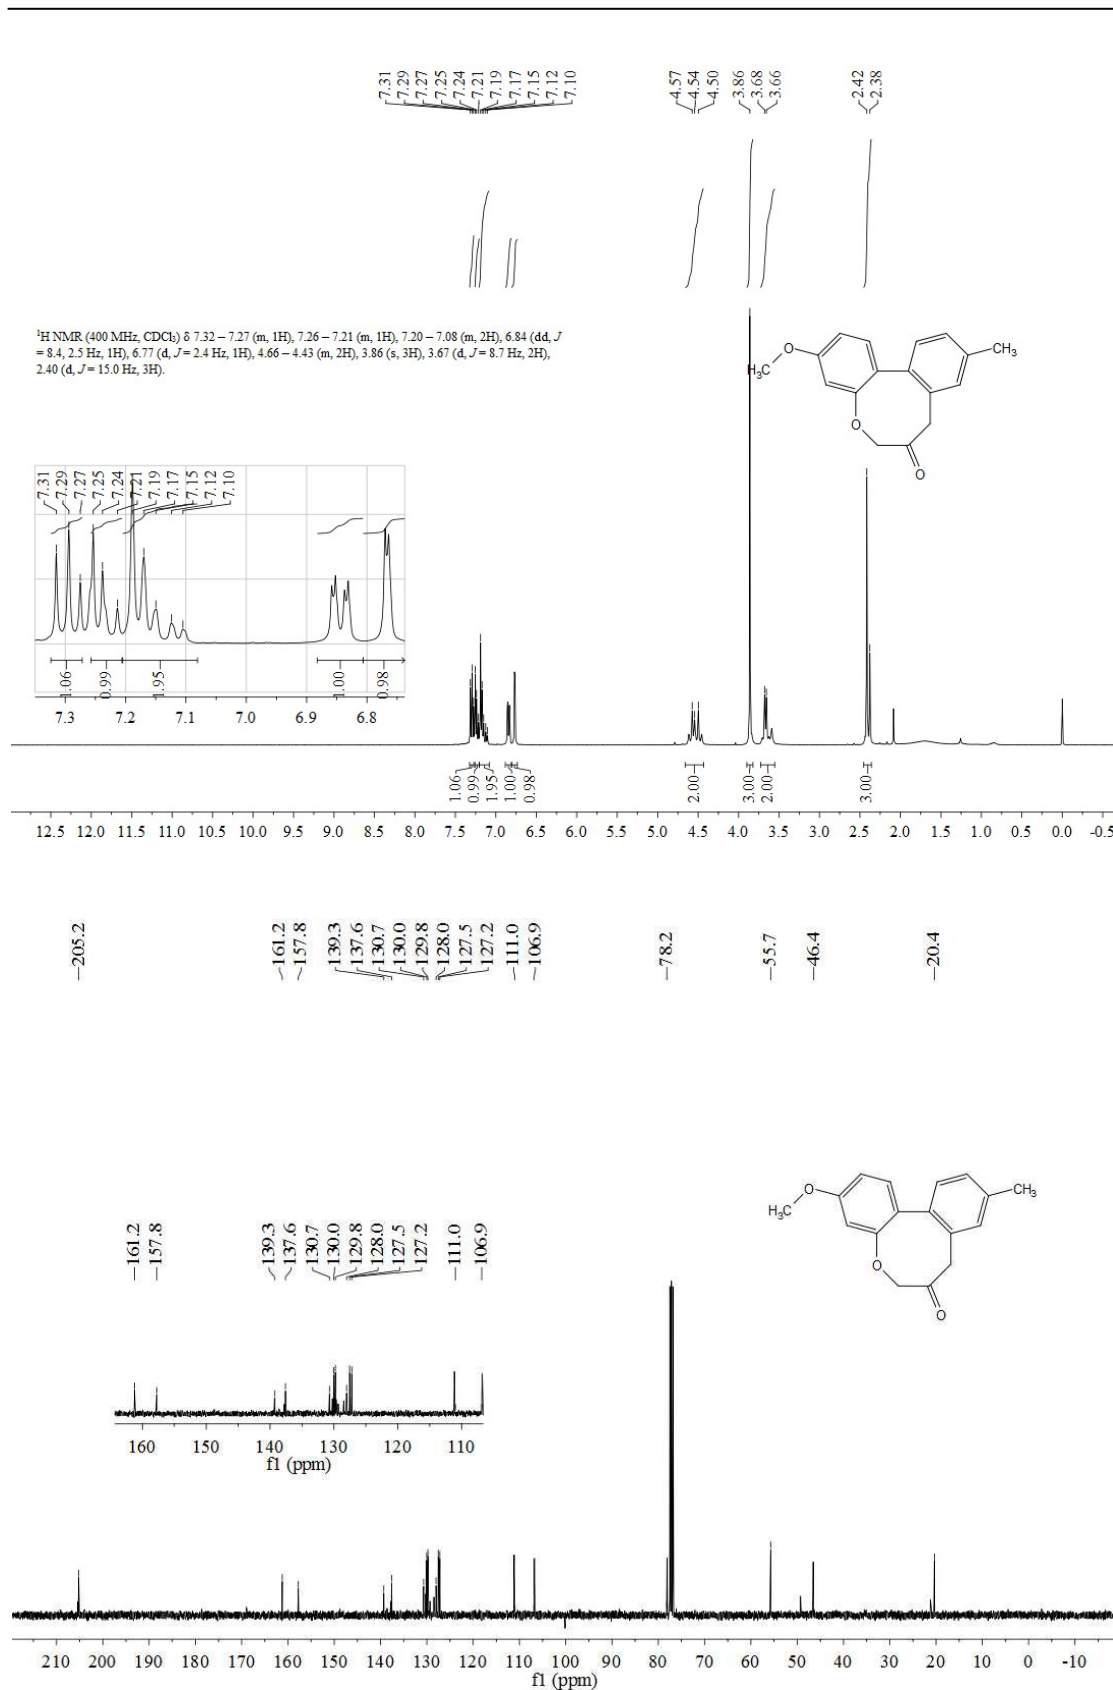

Fig. S84 NMR spectra of **7c**

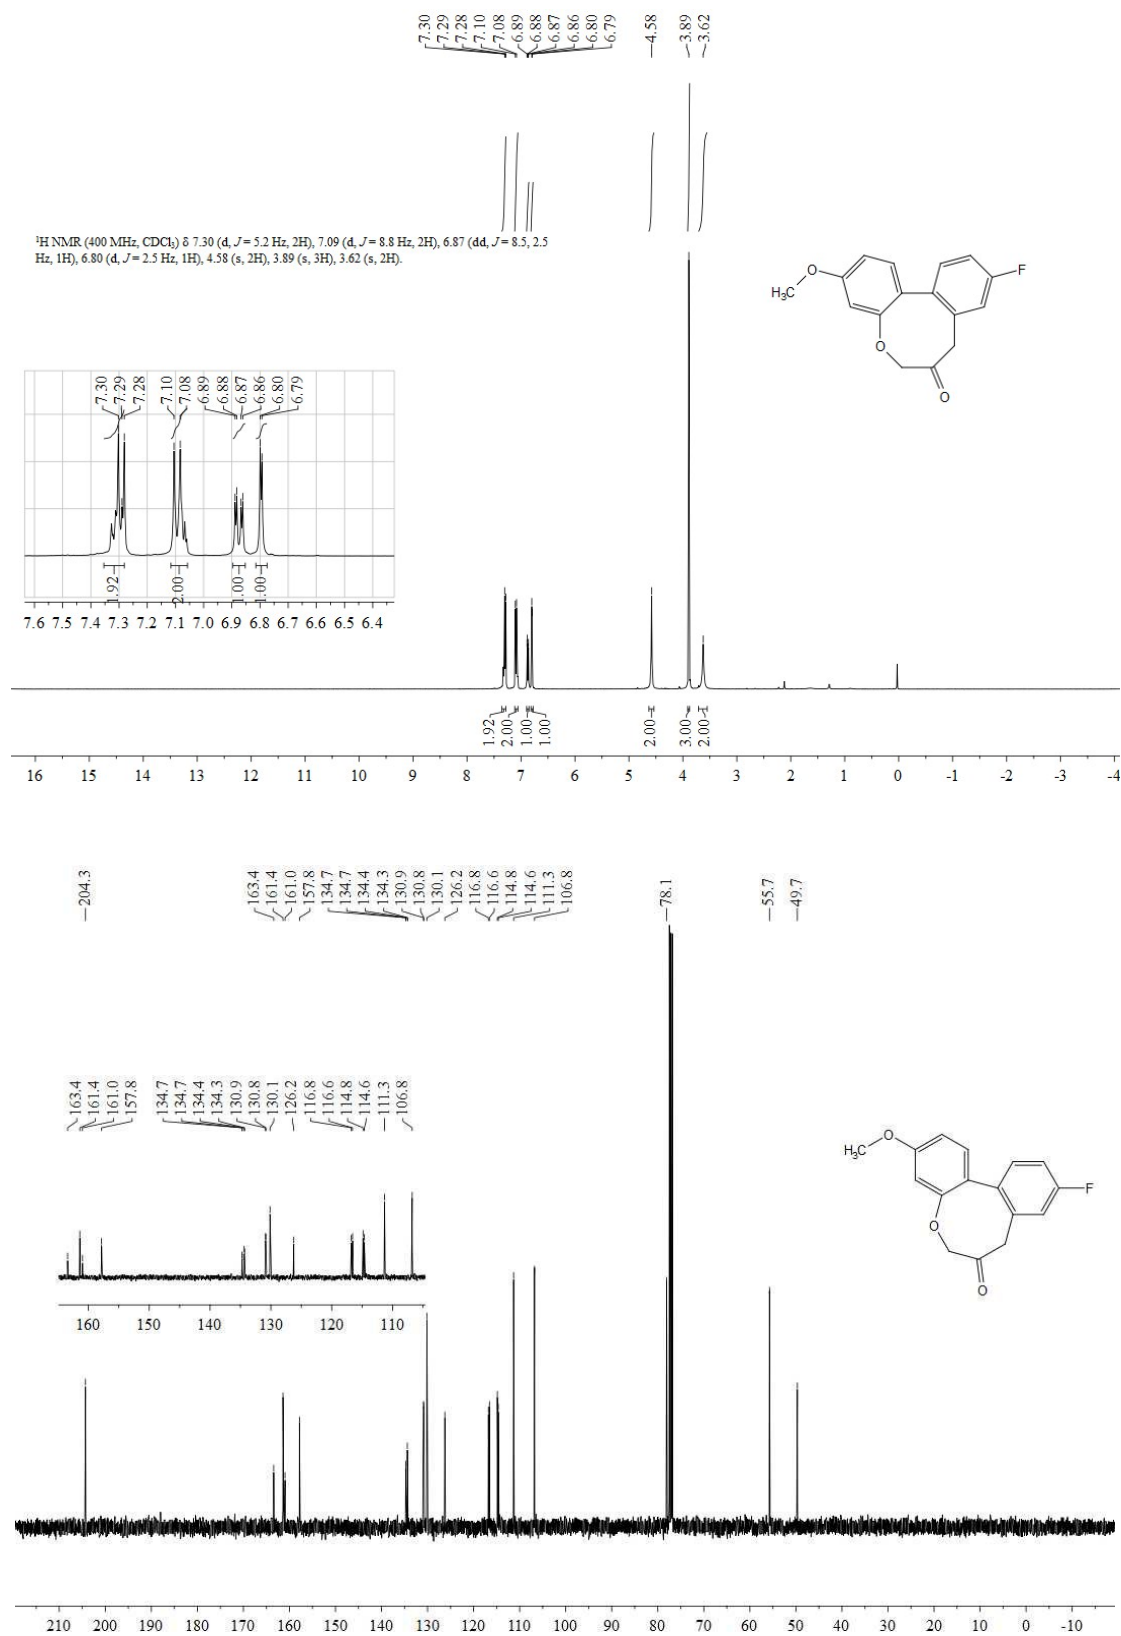

Fig. S85 NMR spectra of 7d

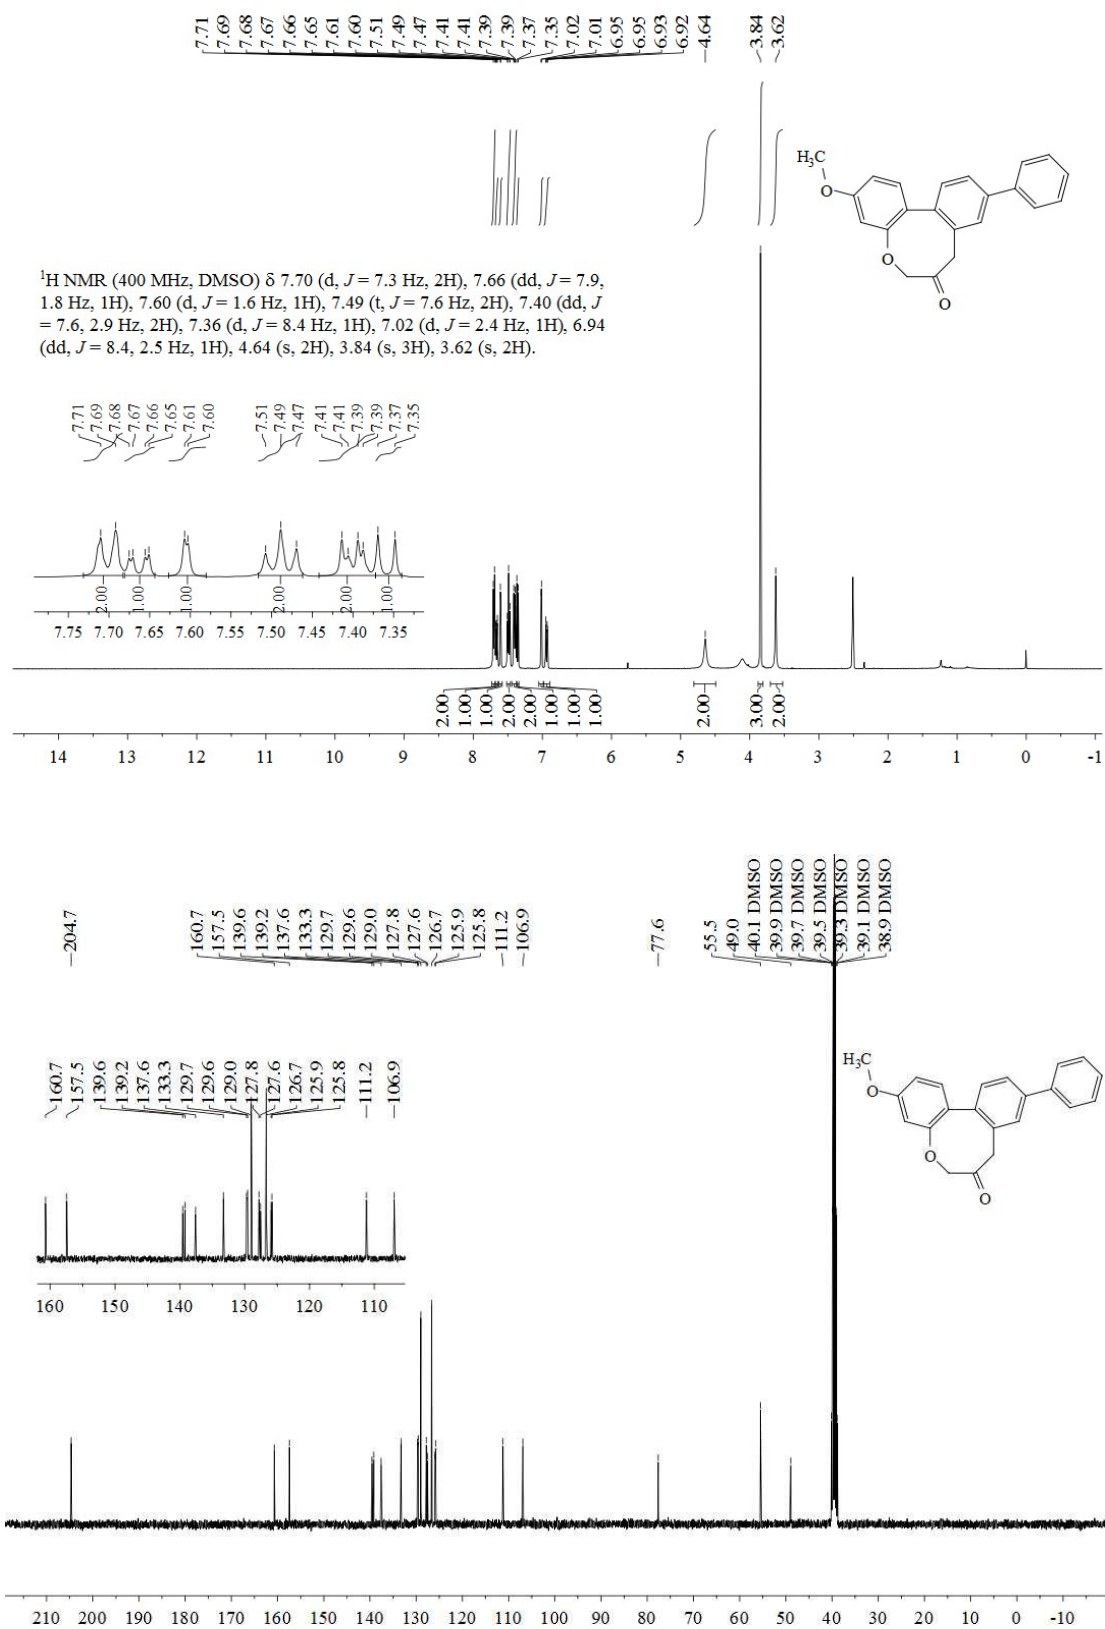

Fig. S86 NMR spectra of 7e

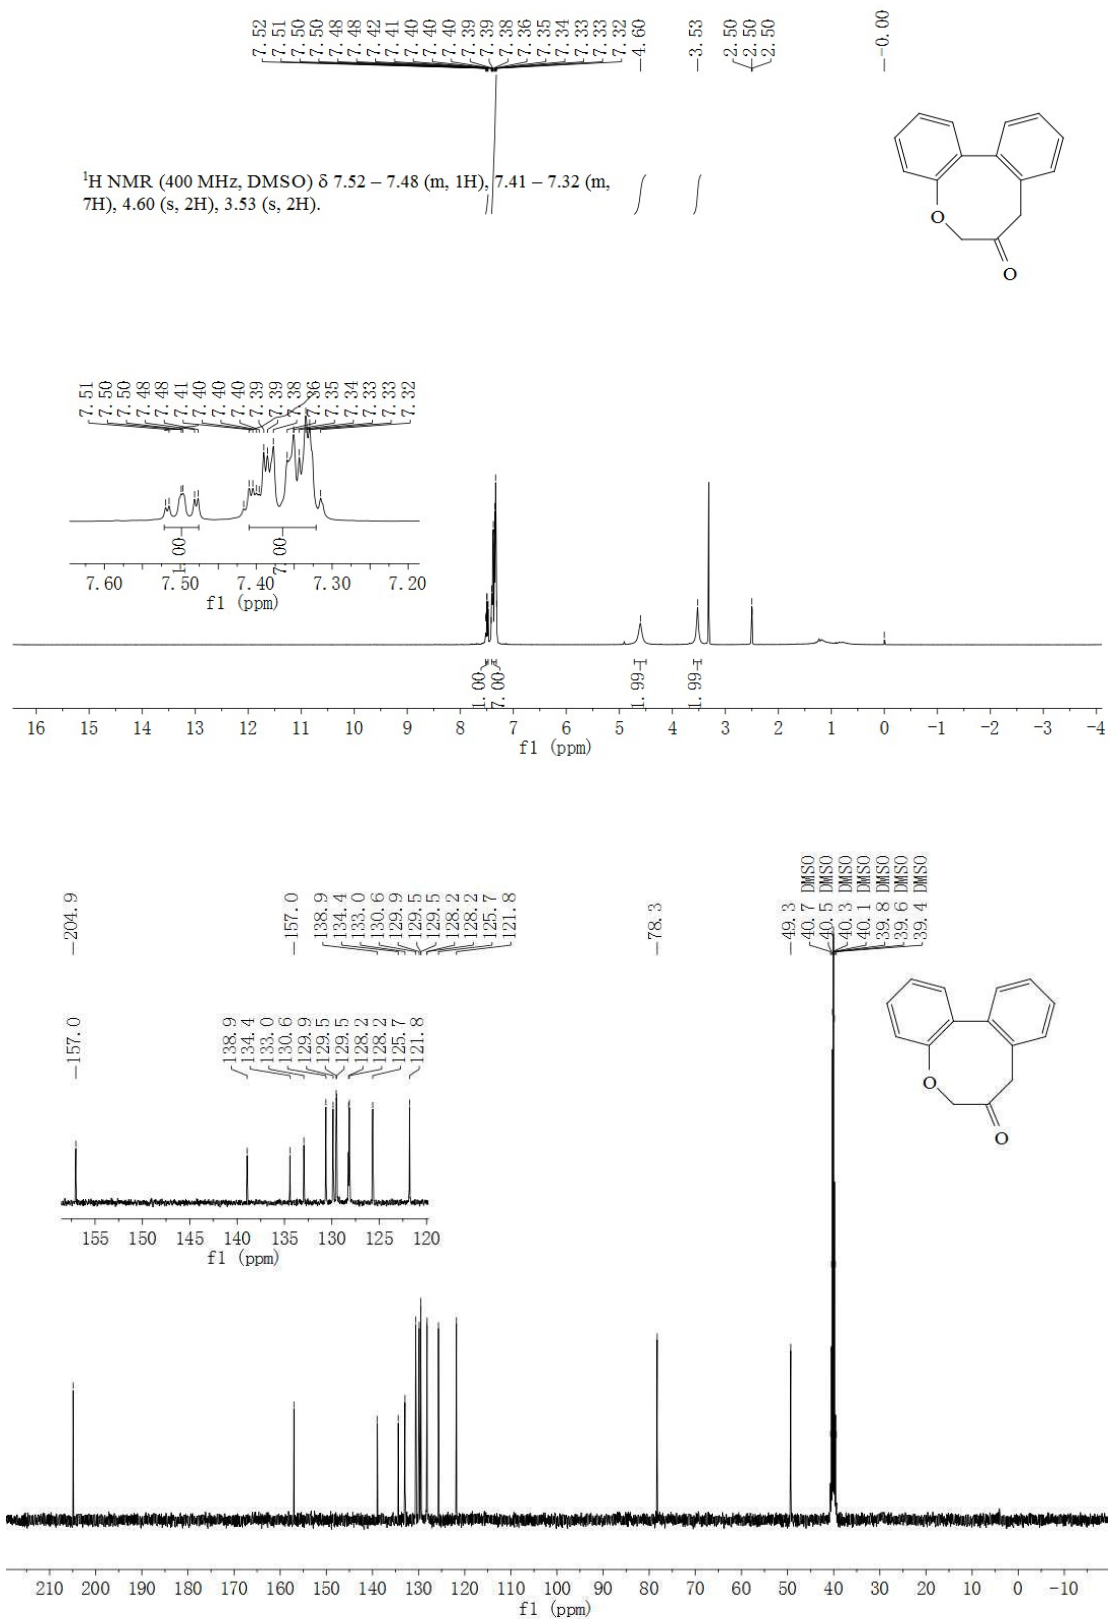

Fig. S87 NMR spectra of 7f

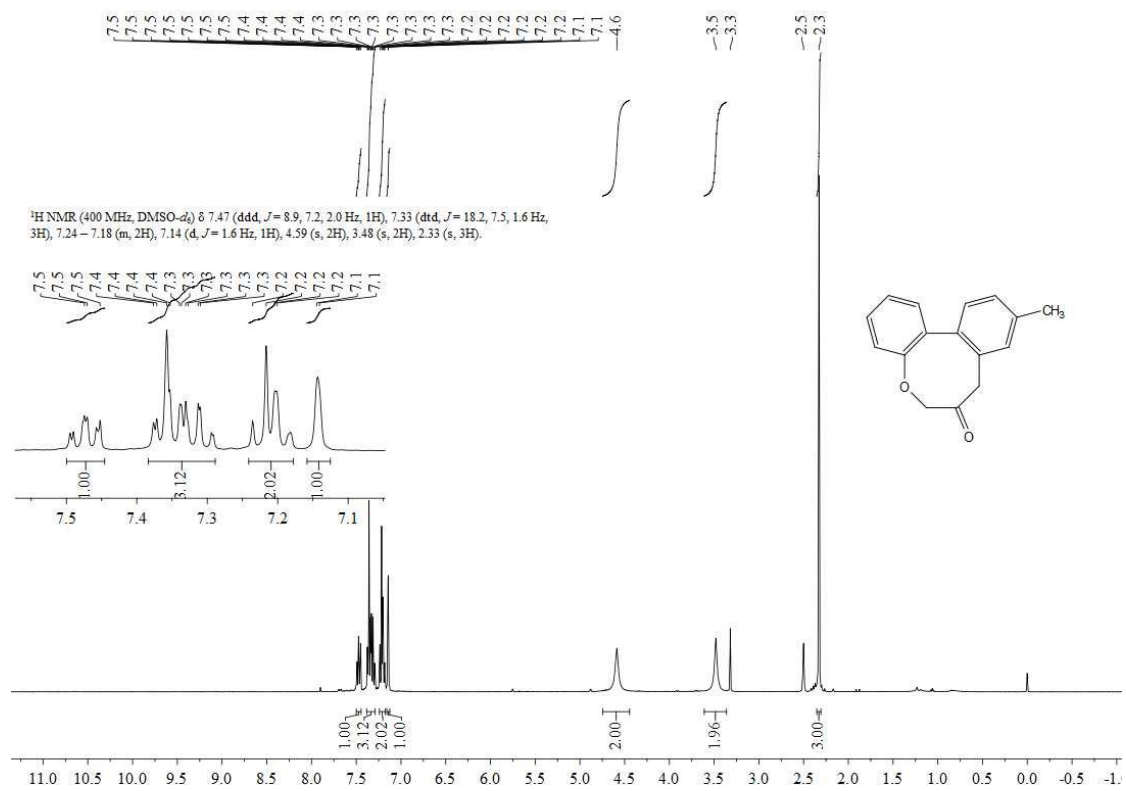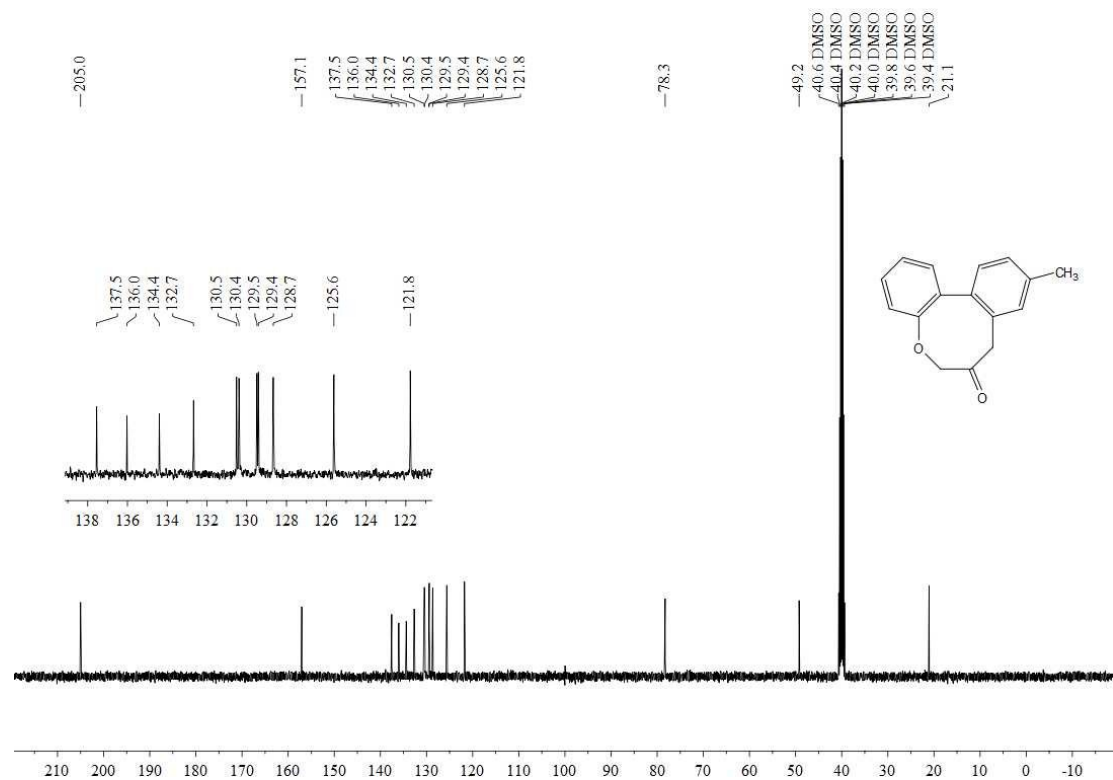

Fig. S88 NMR spectra of 7g

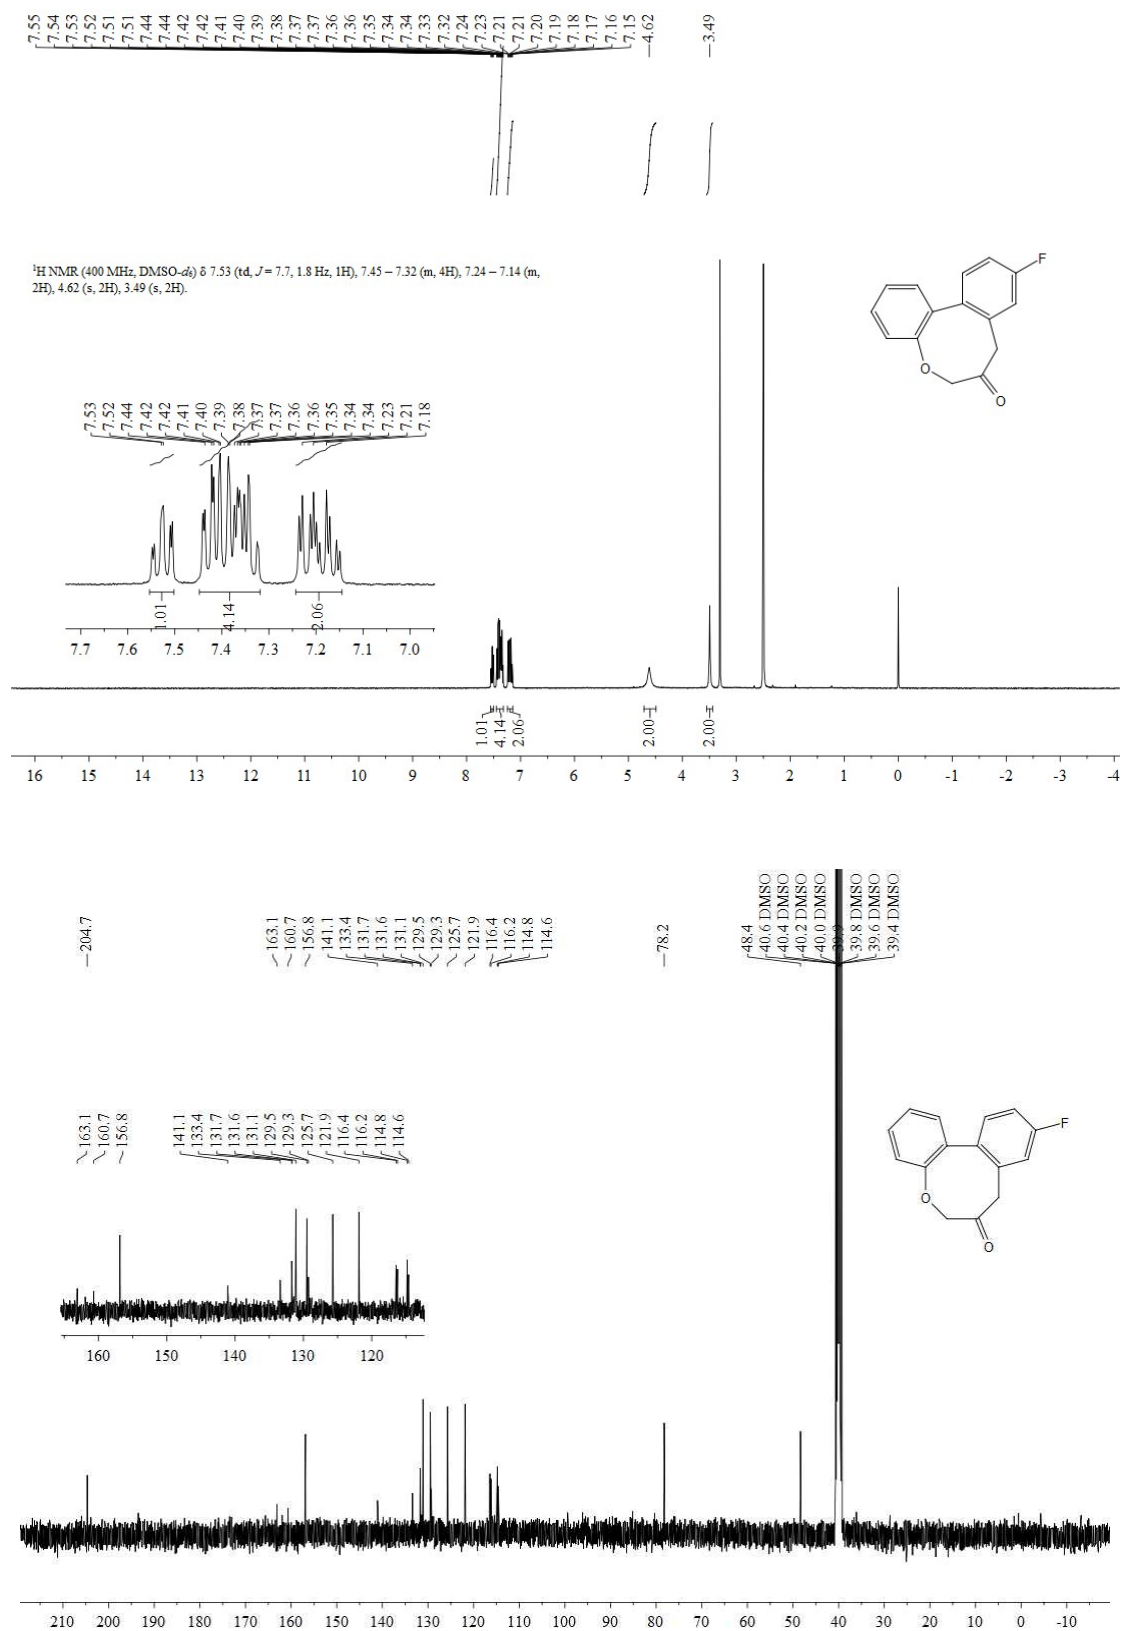

Fig. S89 NMR spectra of 7h

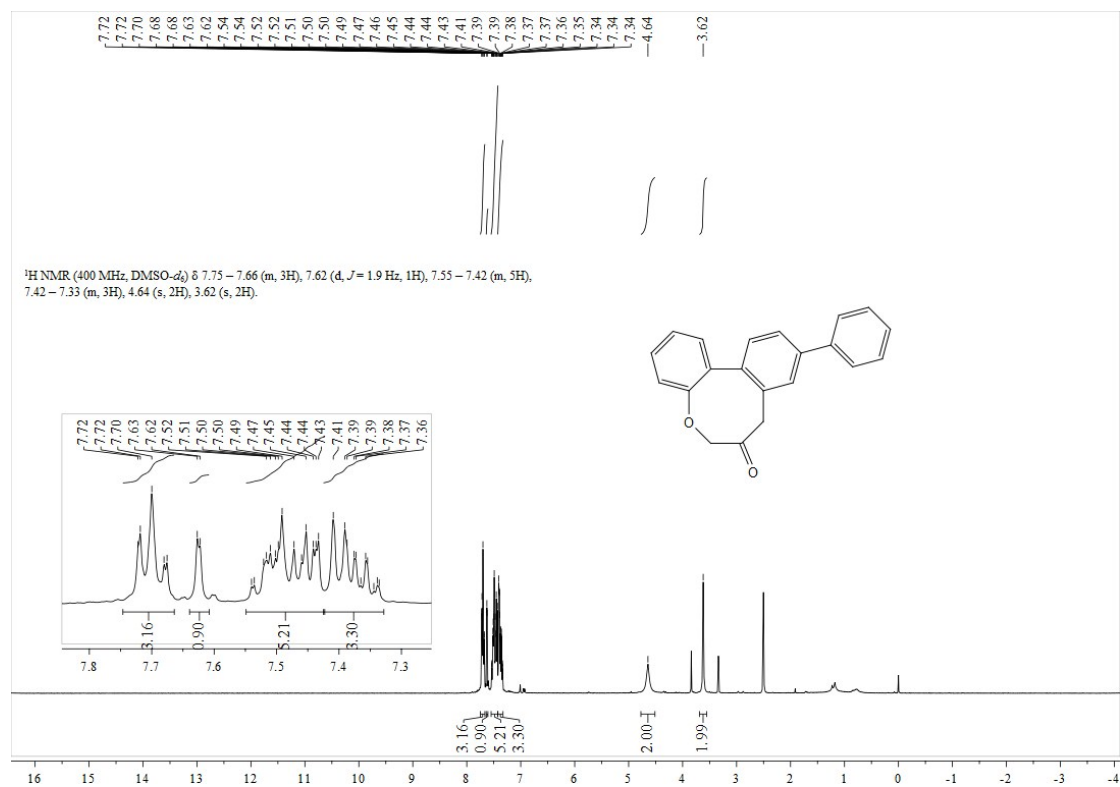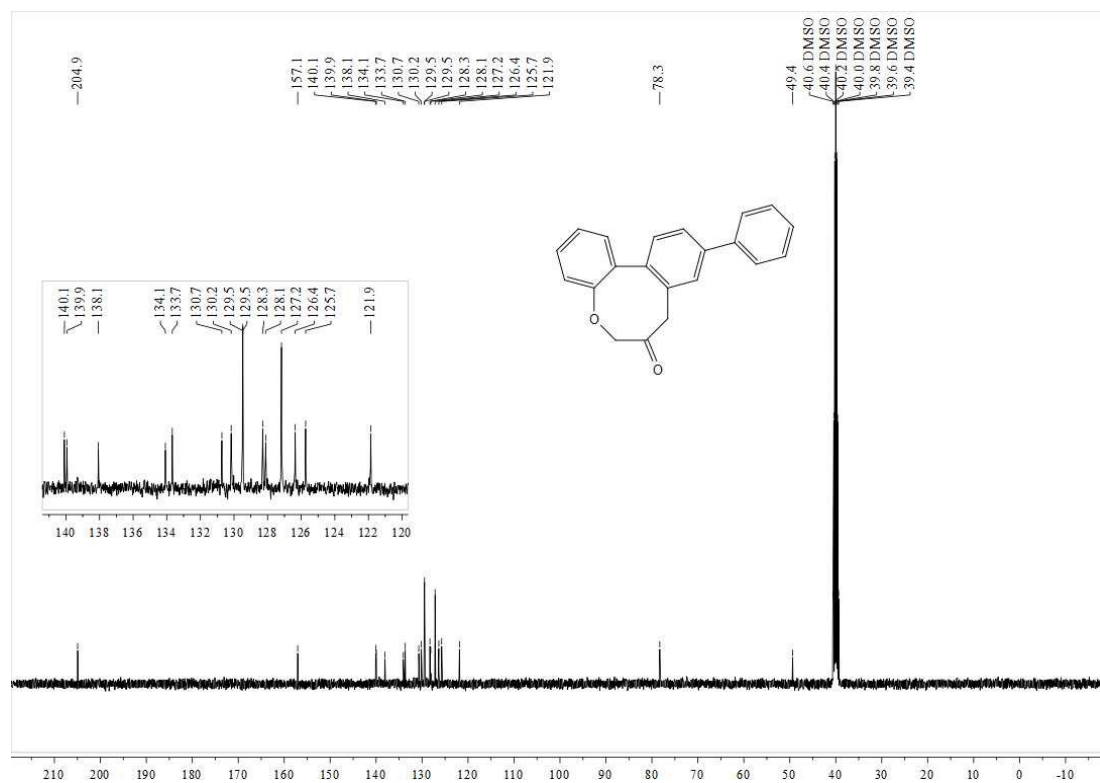

Fig. S90 NMR spectra of 7i



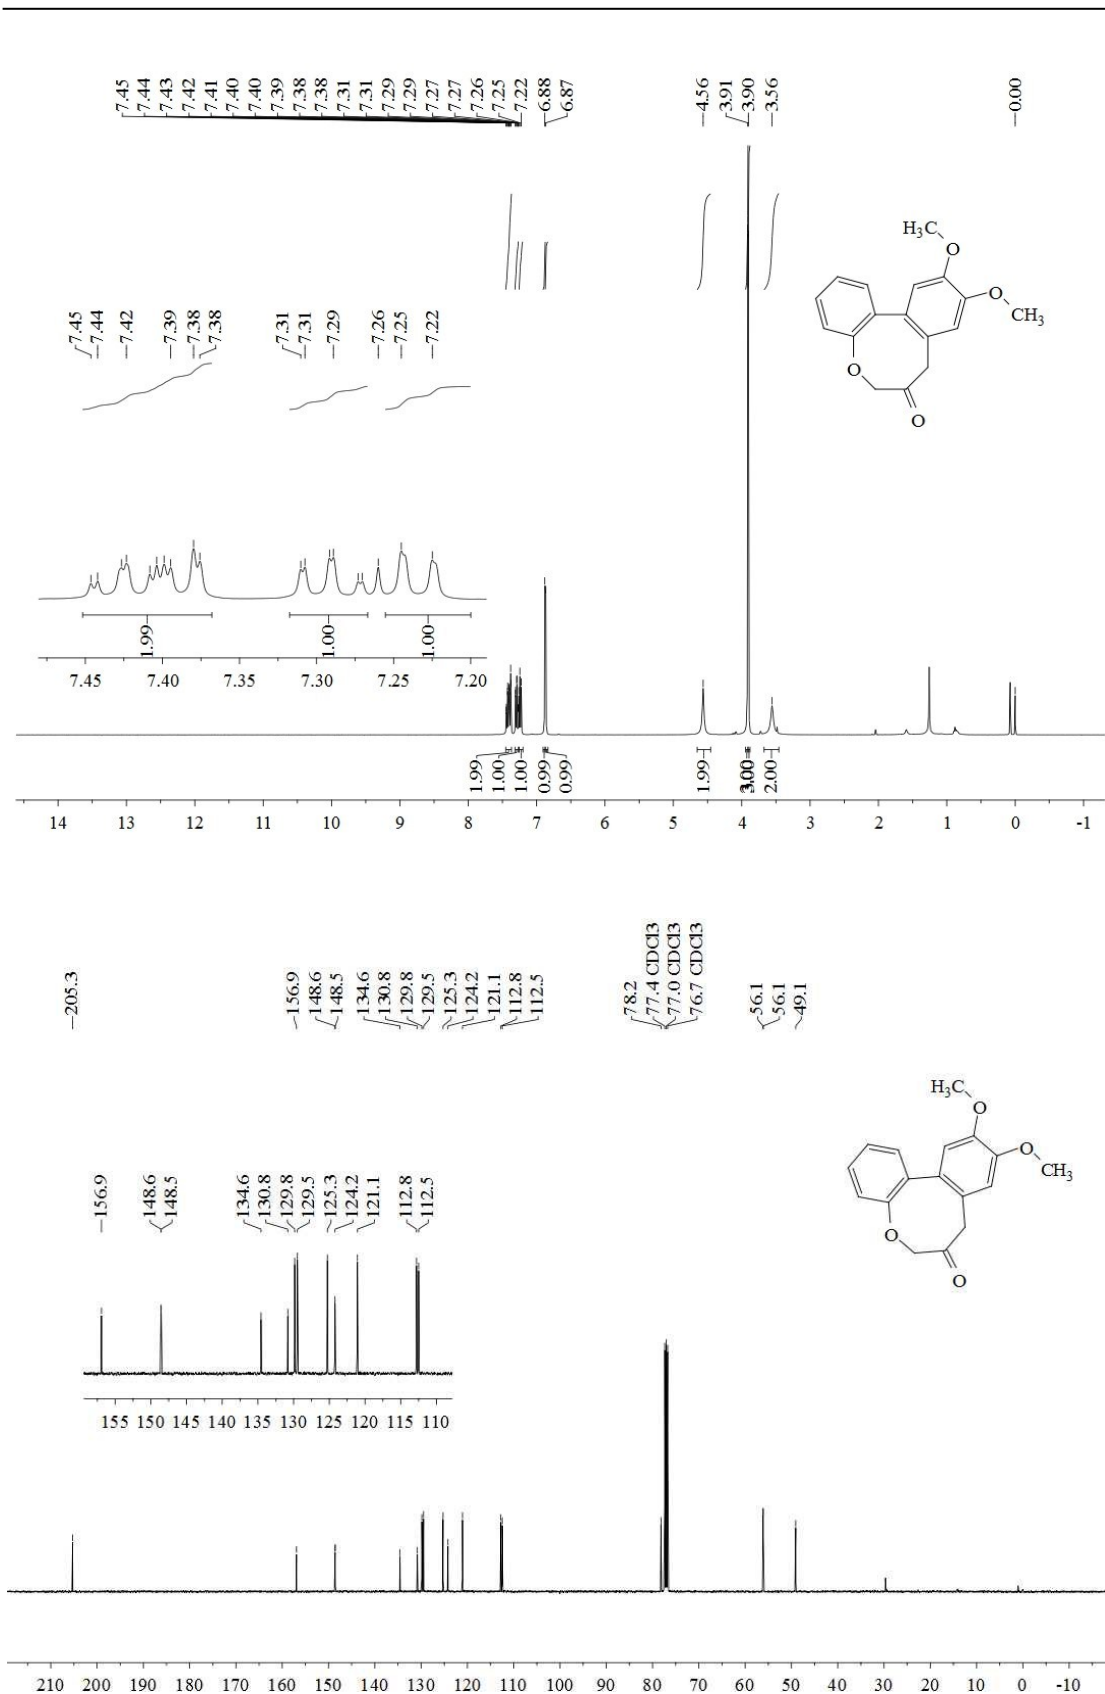

Fig. S91 NMR spectra of 7j

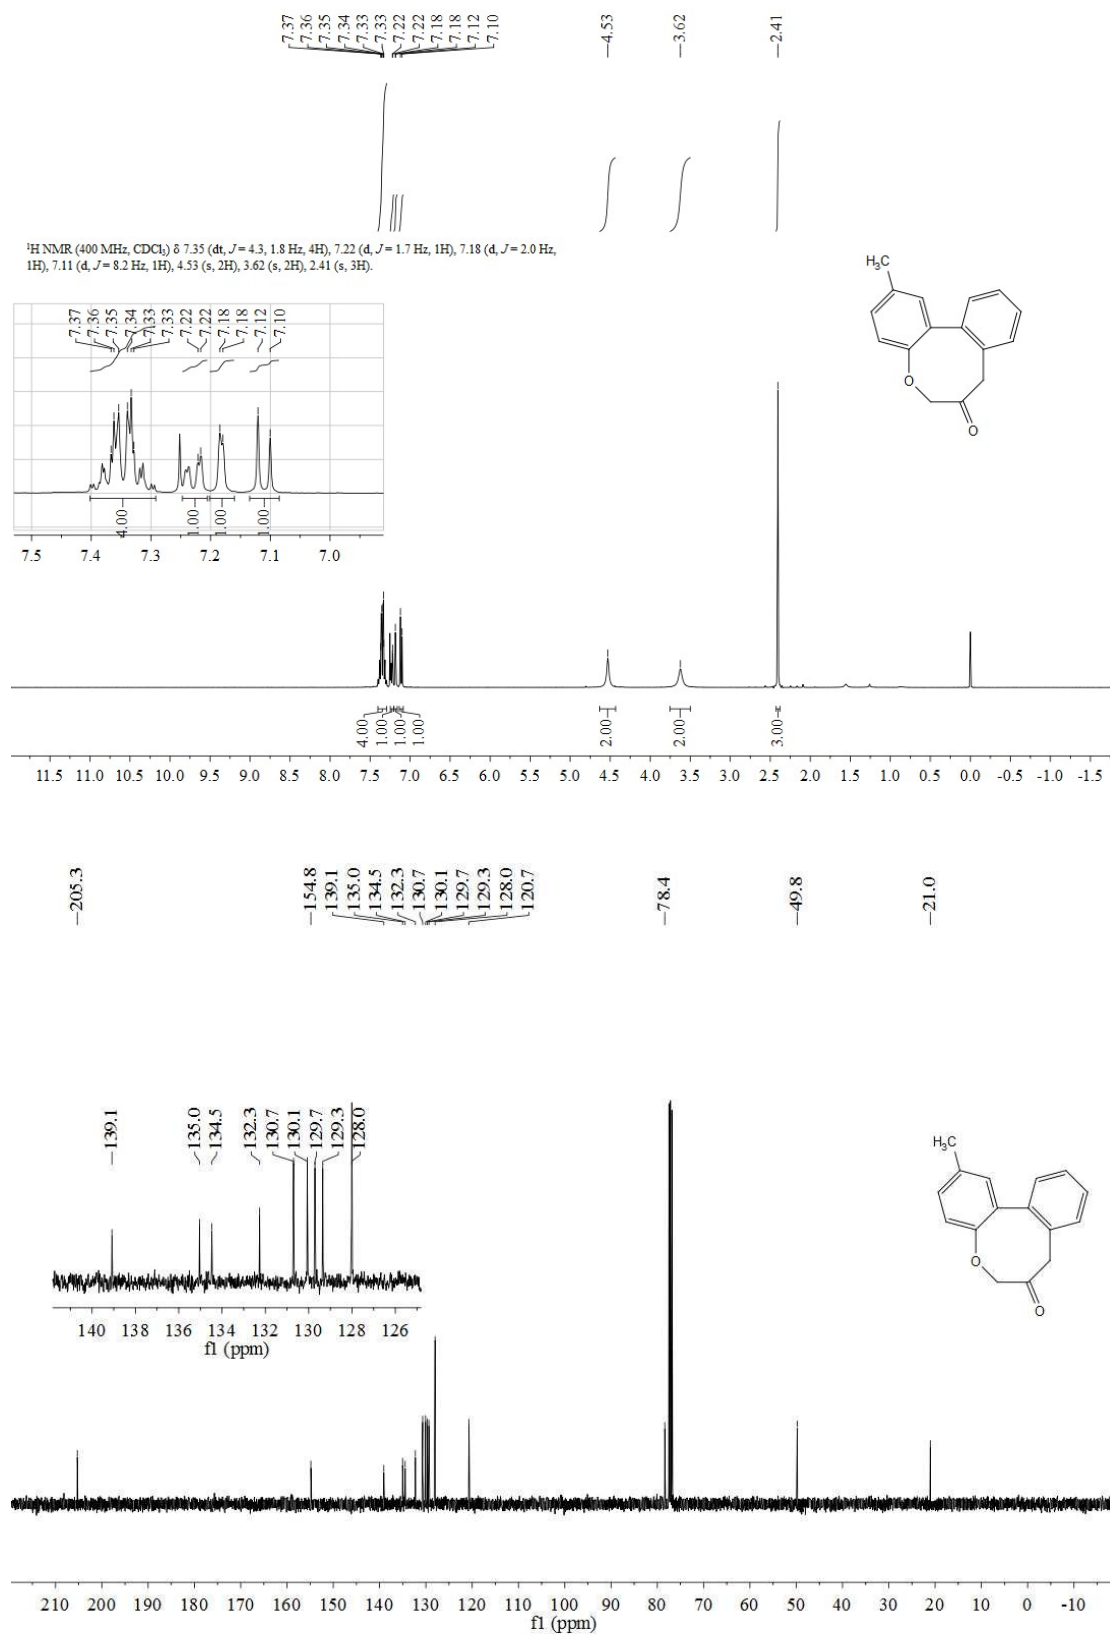

Fig. S92 NMR spectra of 7k

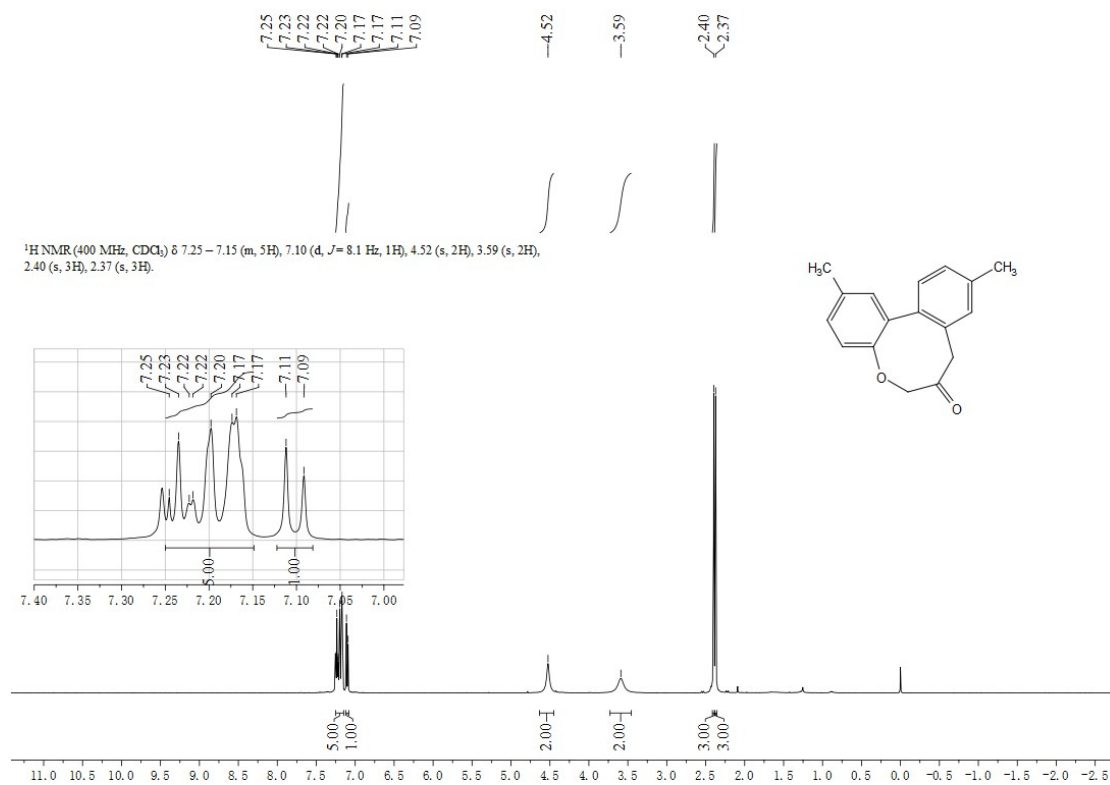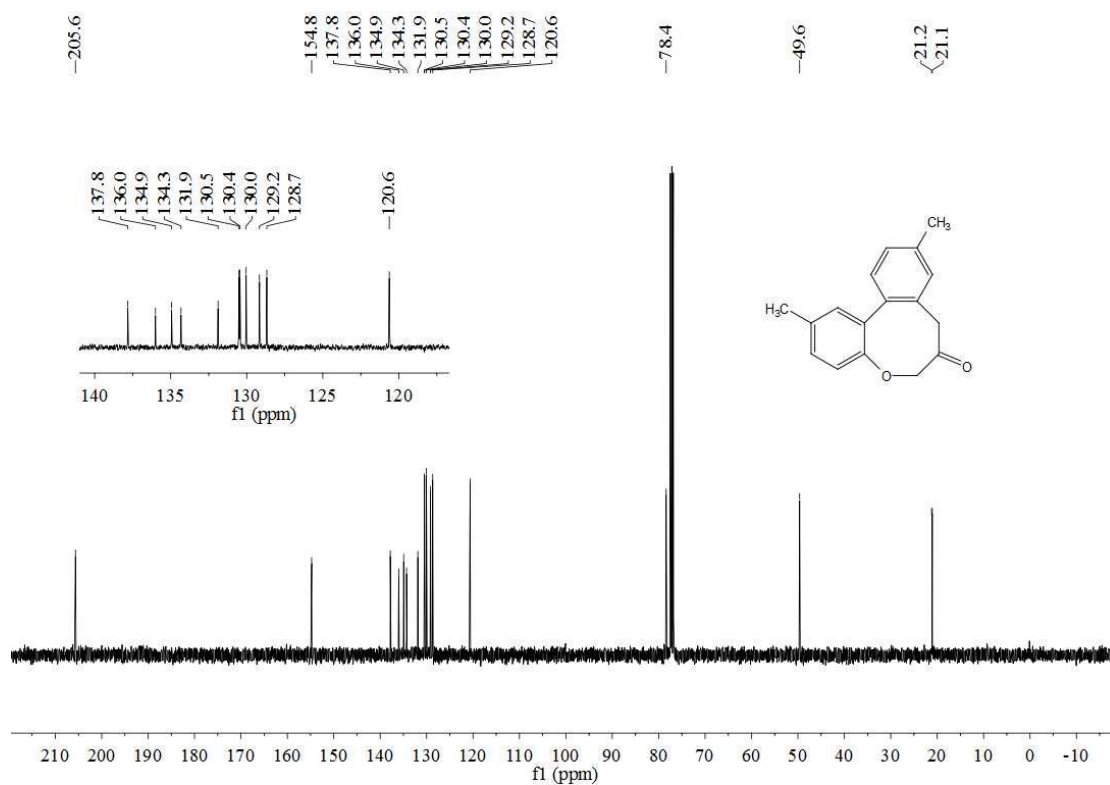

Fig. S93 NMR spectra of 71

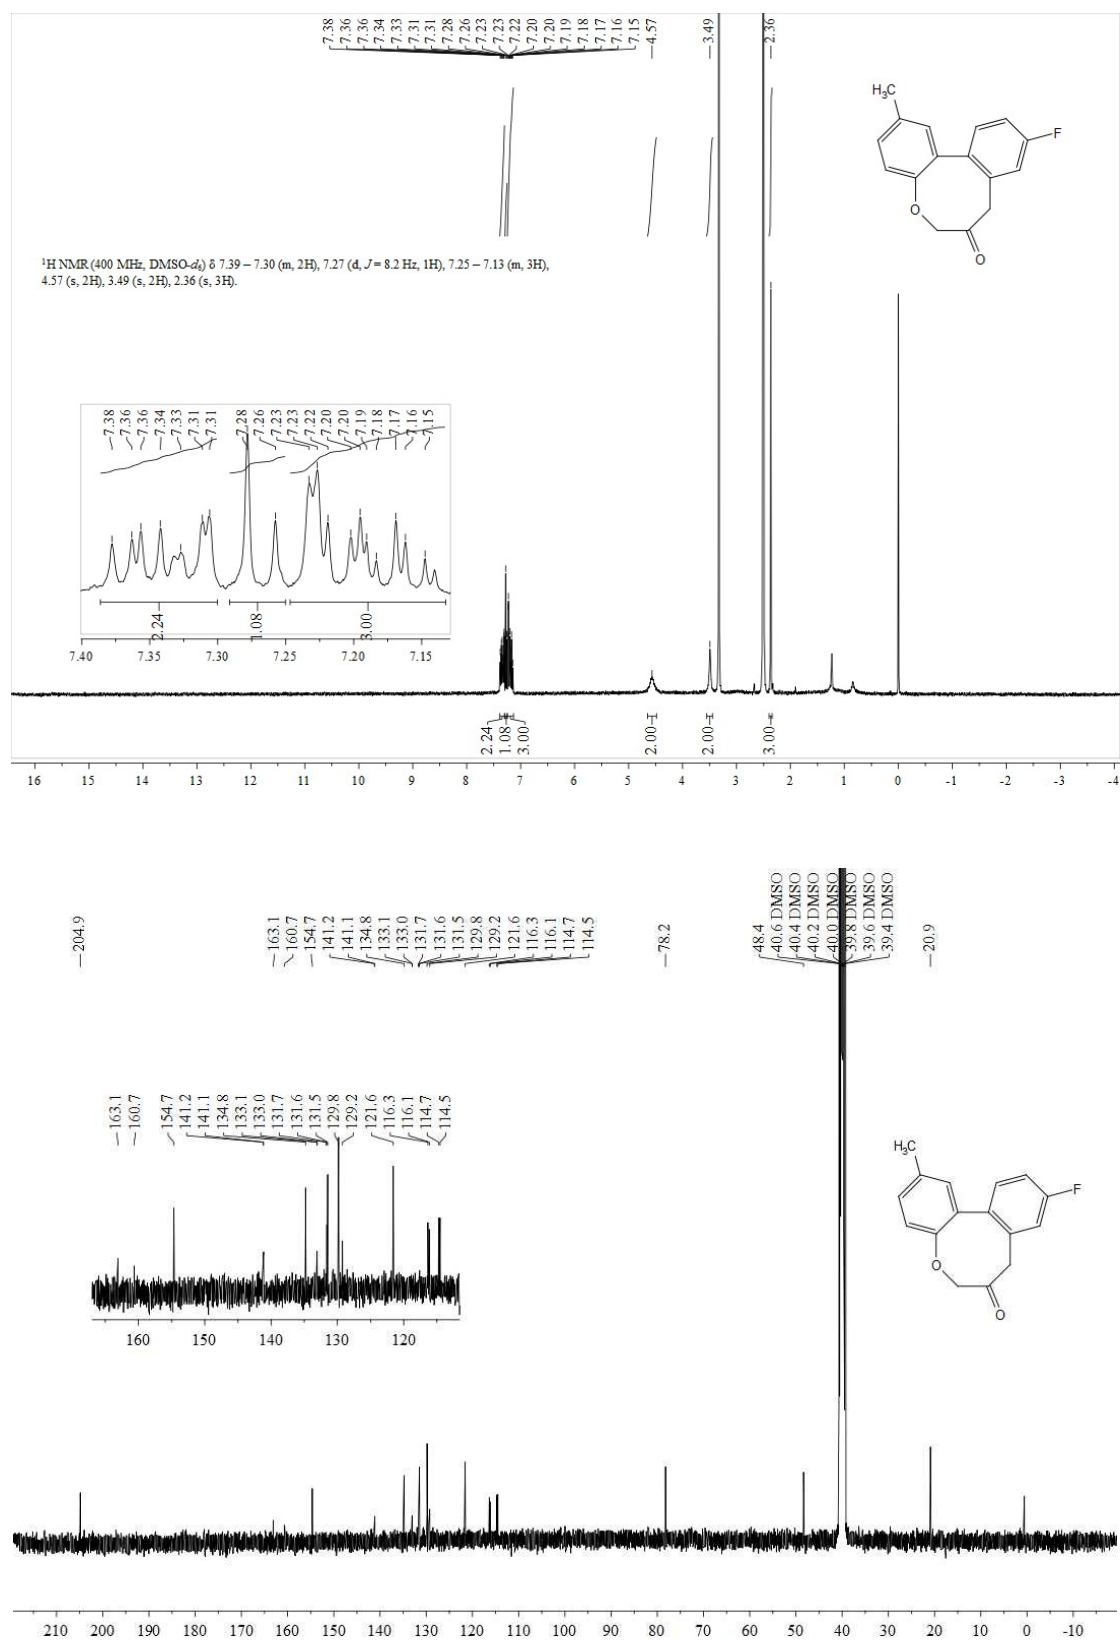

Fig. S94 NMR spectra of **7m**

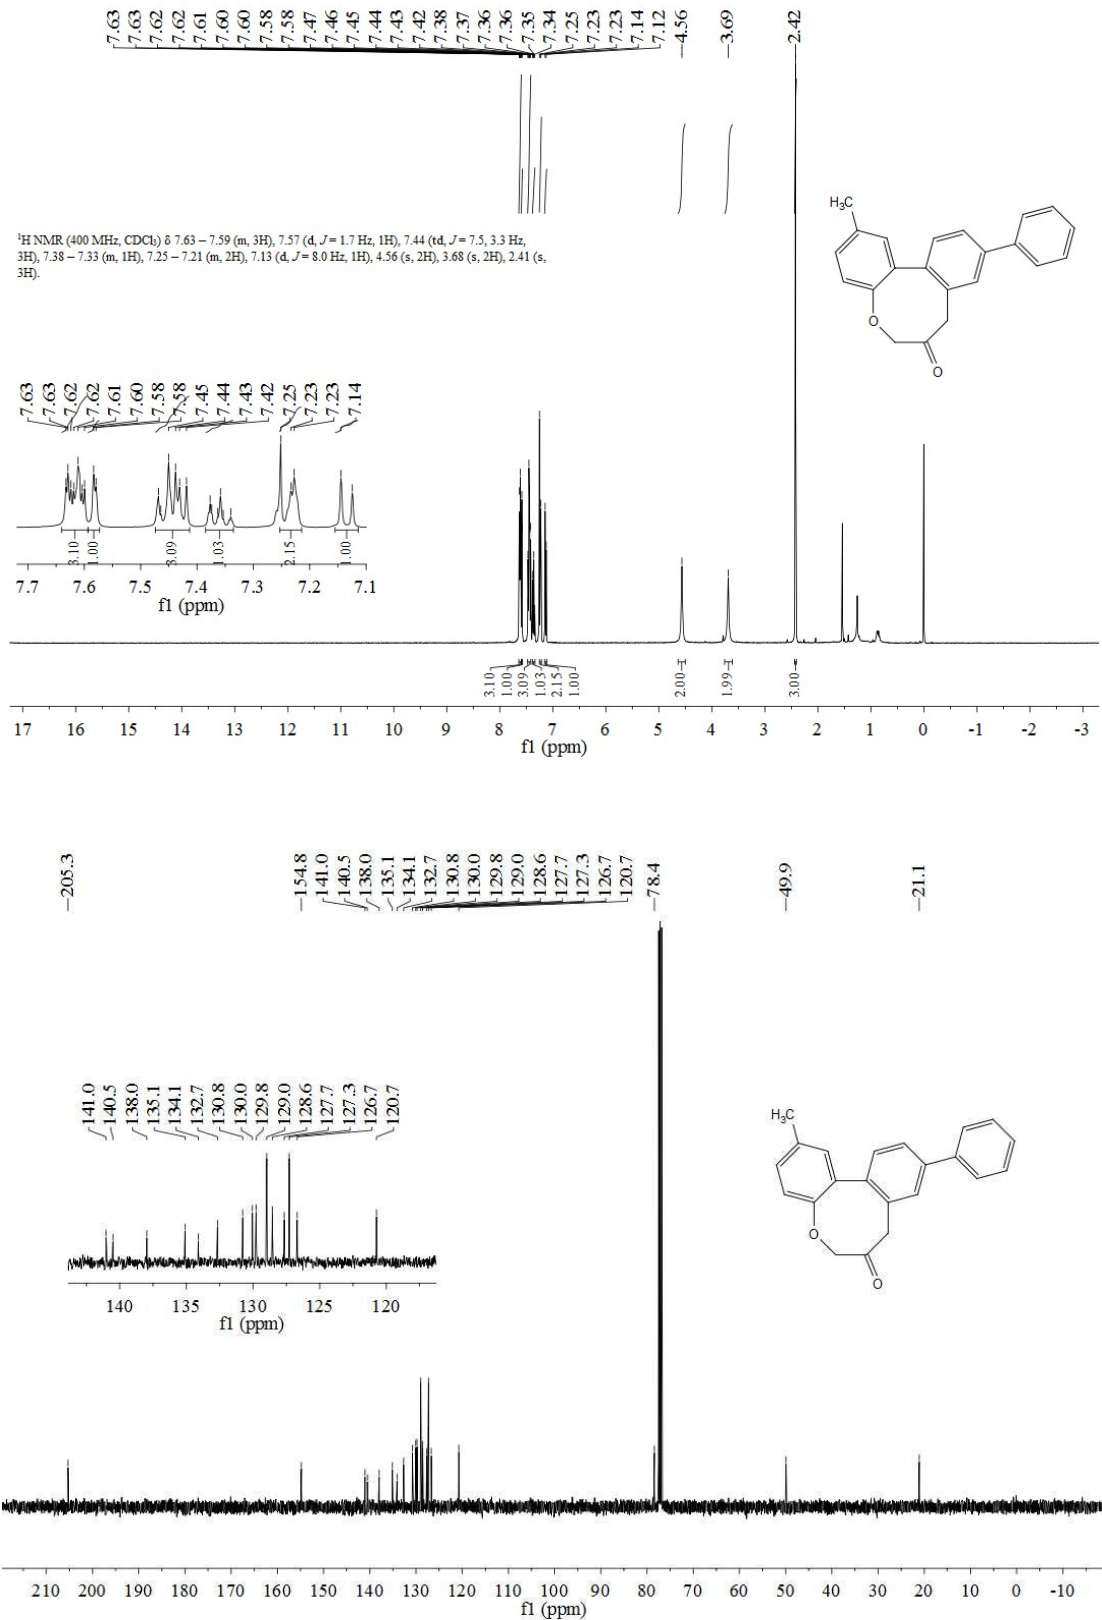

Fig. S95 NMR spectra of **7n**

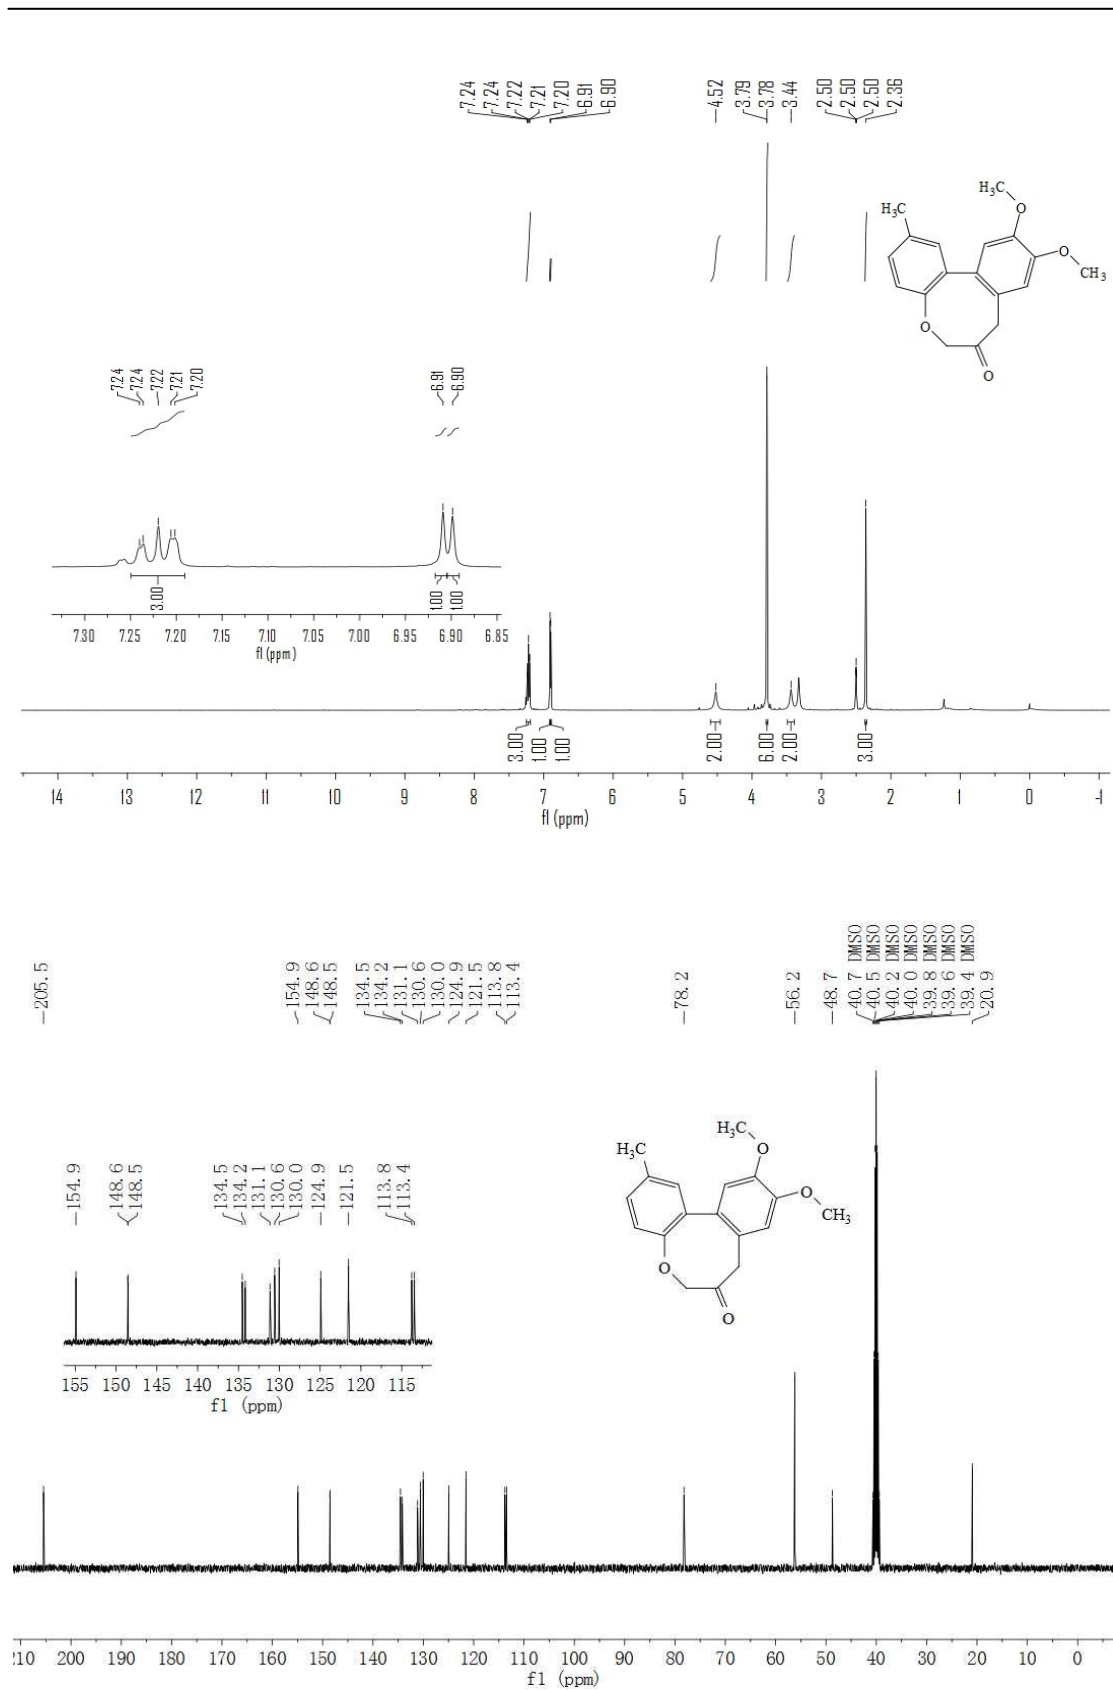

Fig. S96 NMR spectra of **7o**

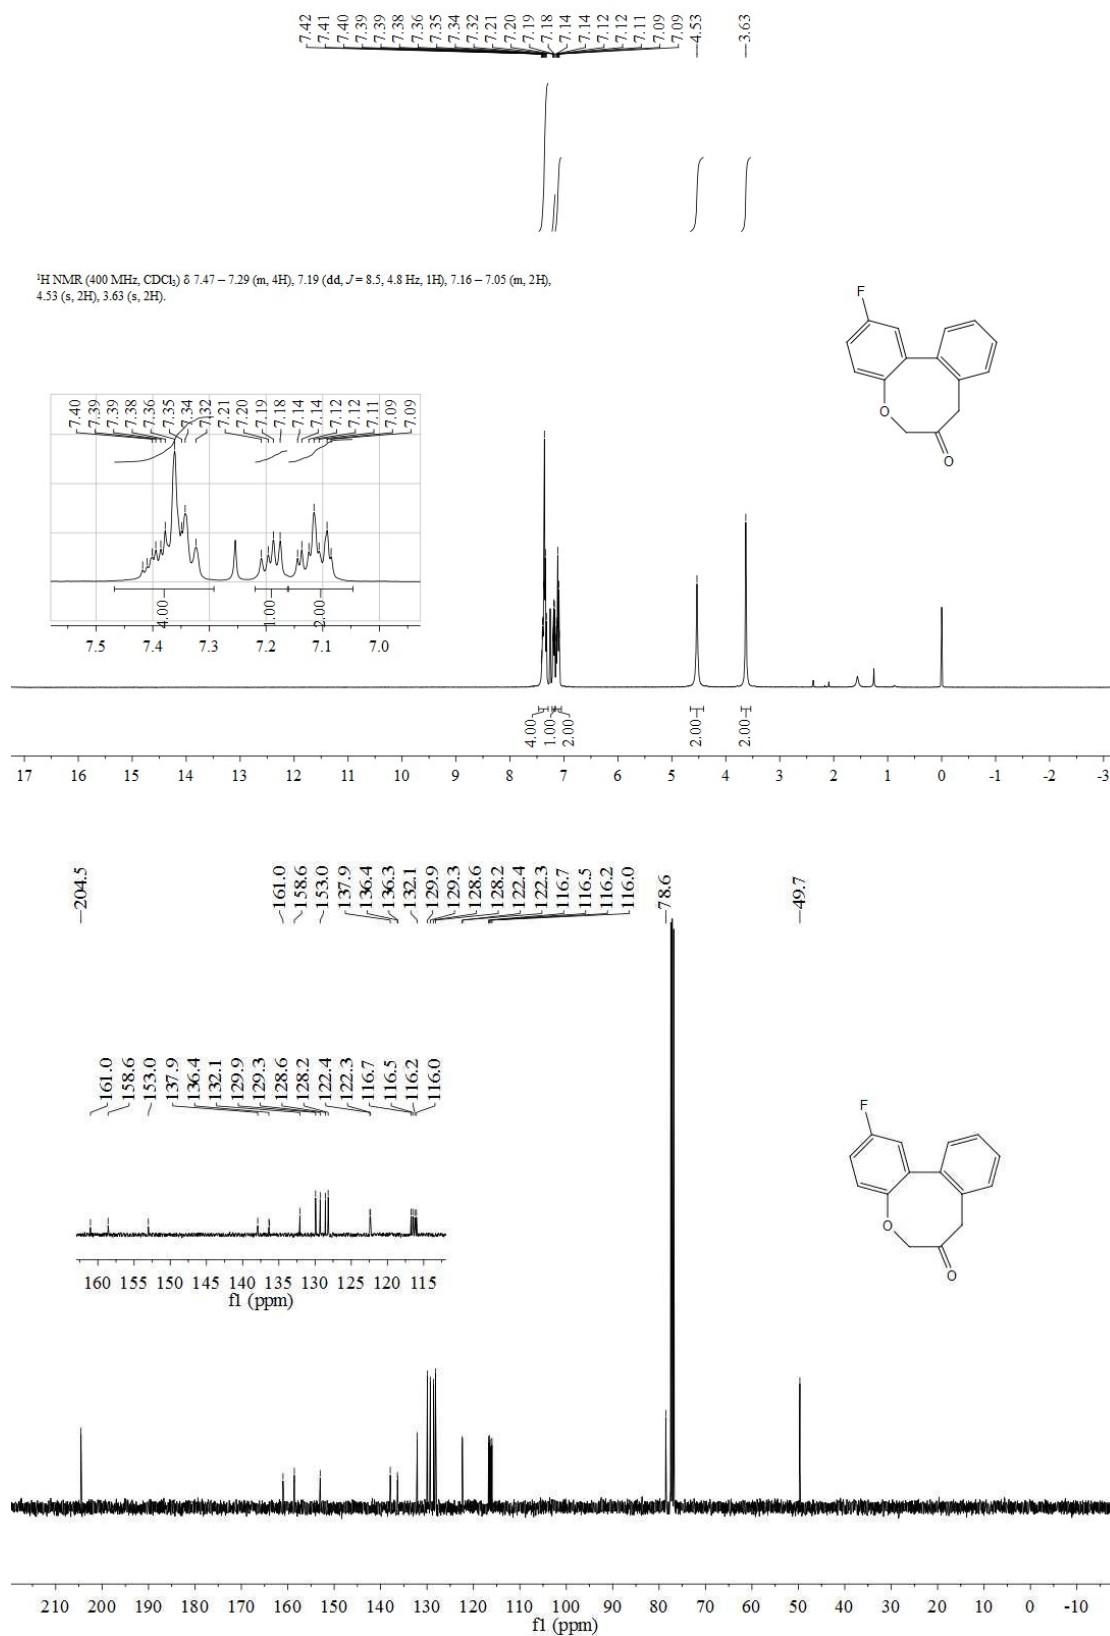

Fig. S97 NMR spectra of **7p**

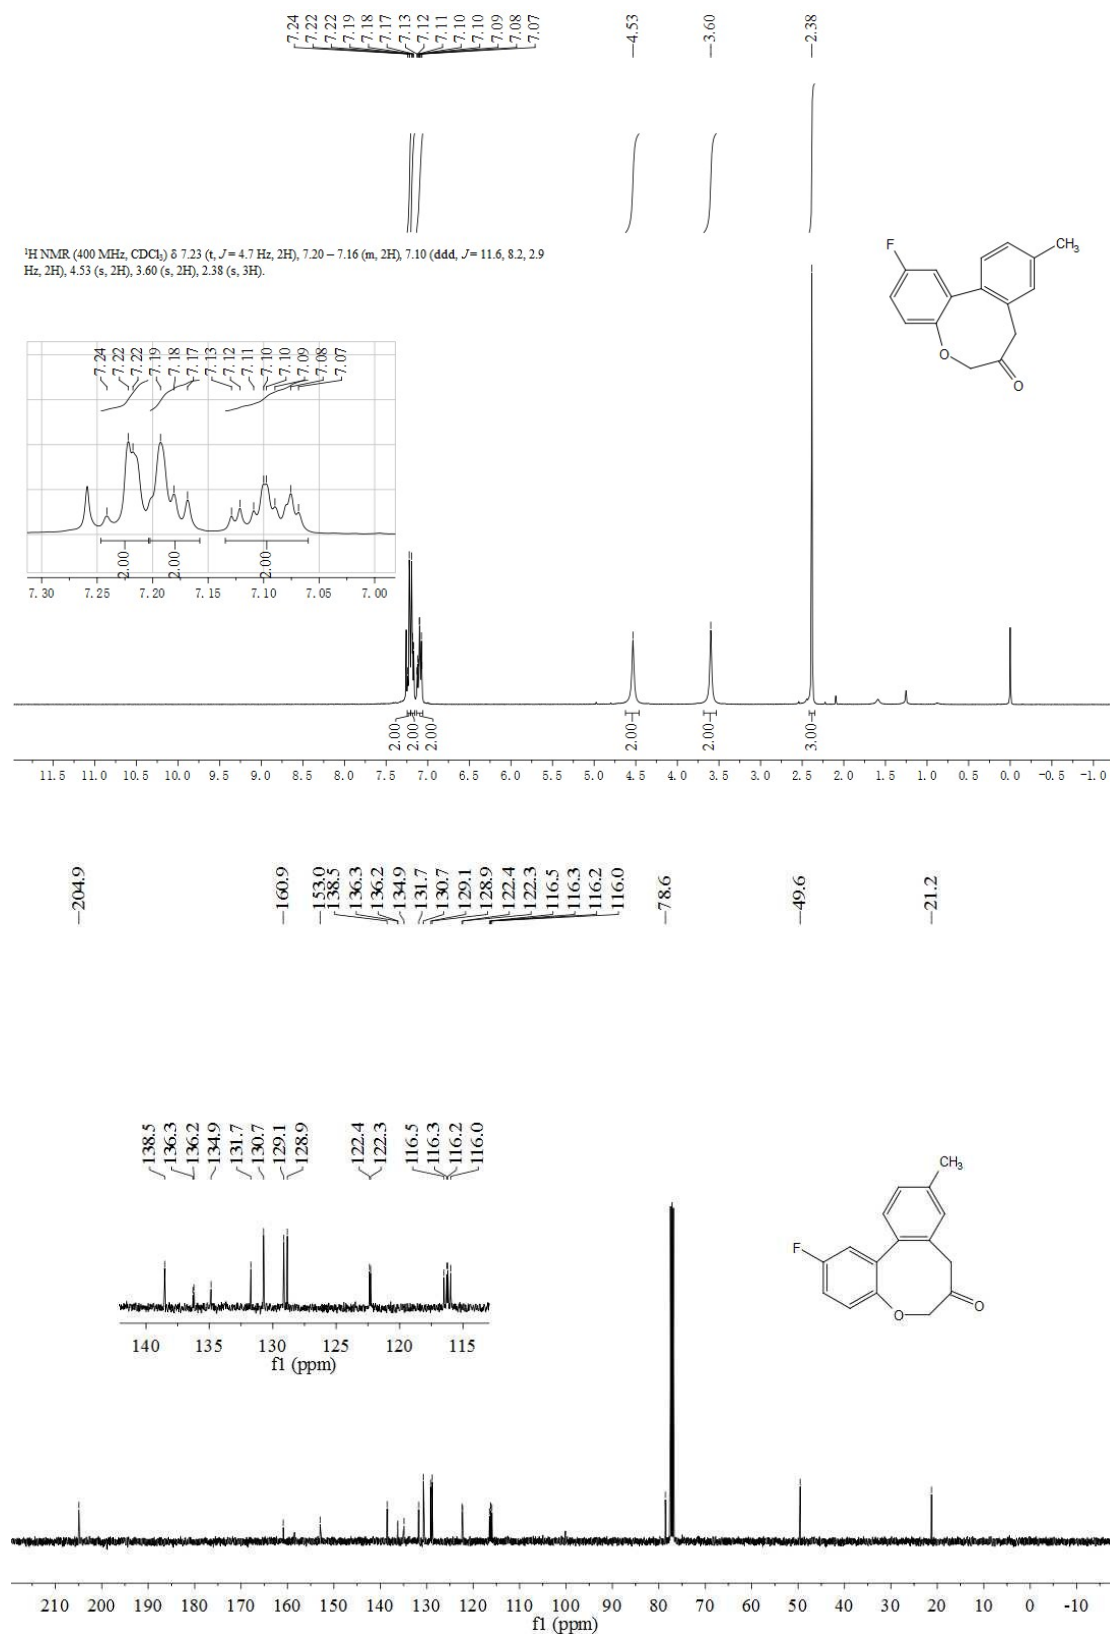

Fig. S98 NMR spectra of **7q**



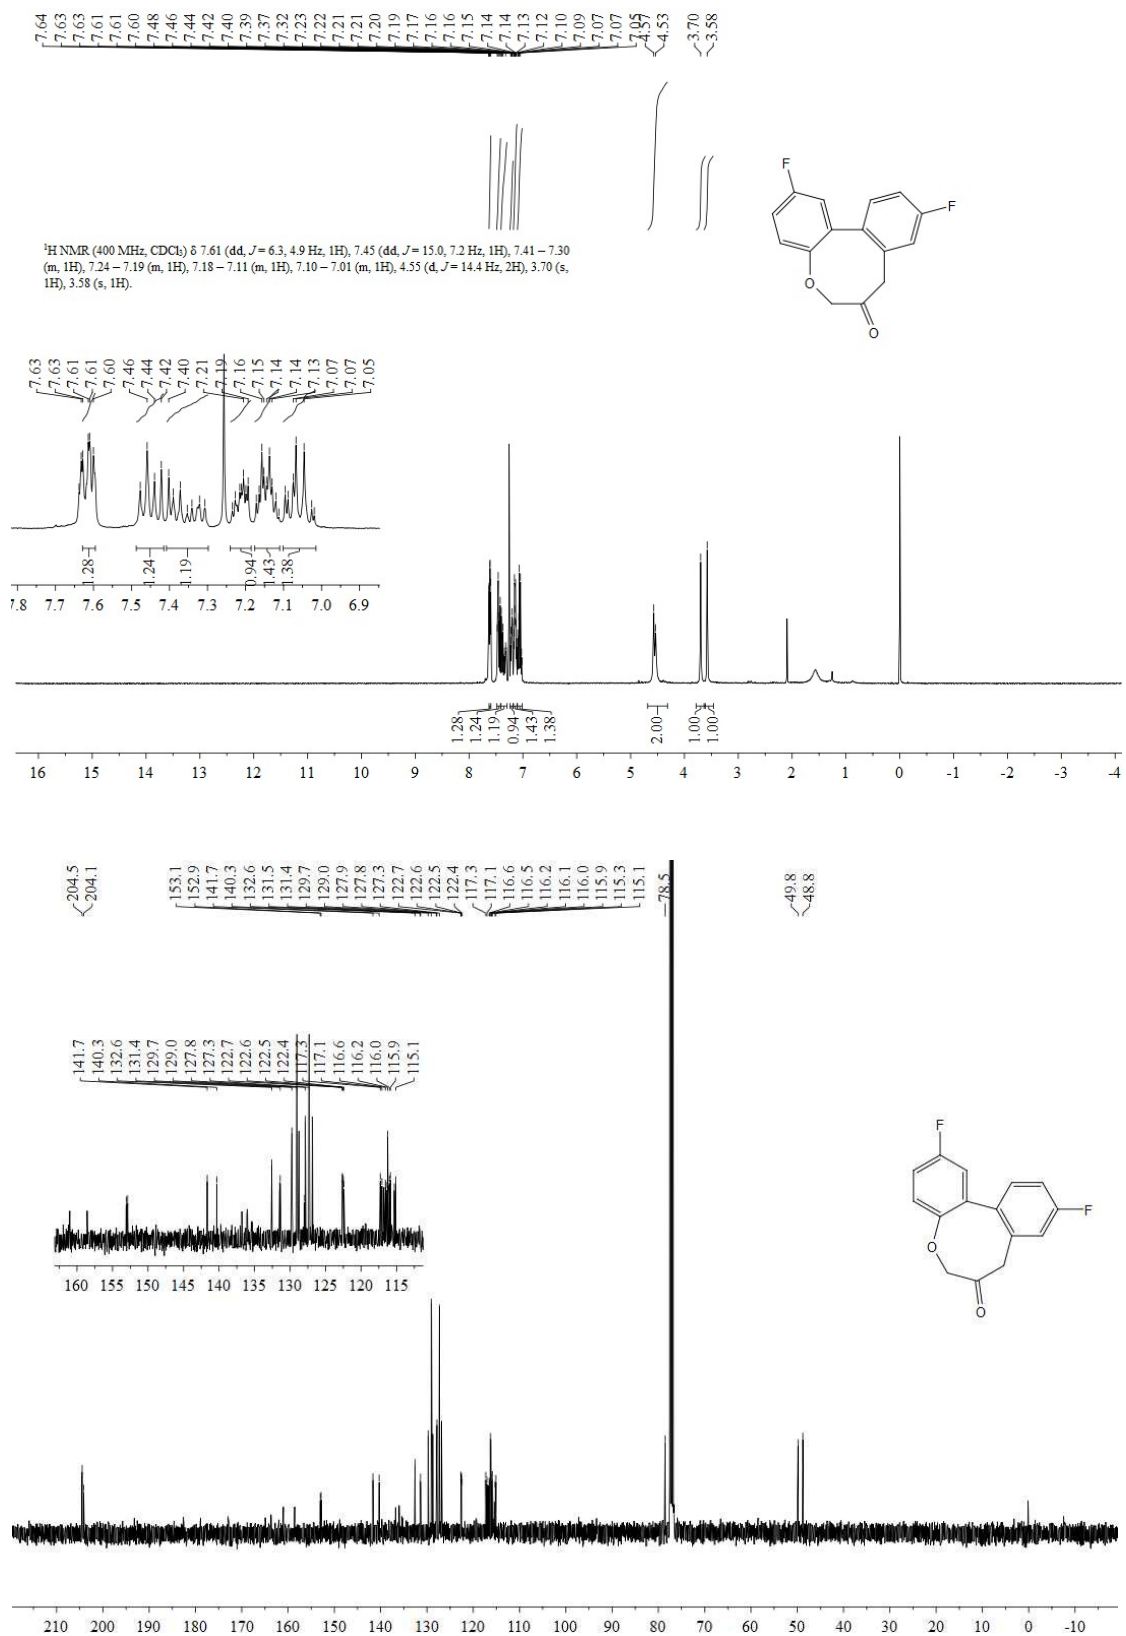

Fig. S99 NMR spectra of **7r**

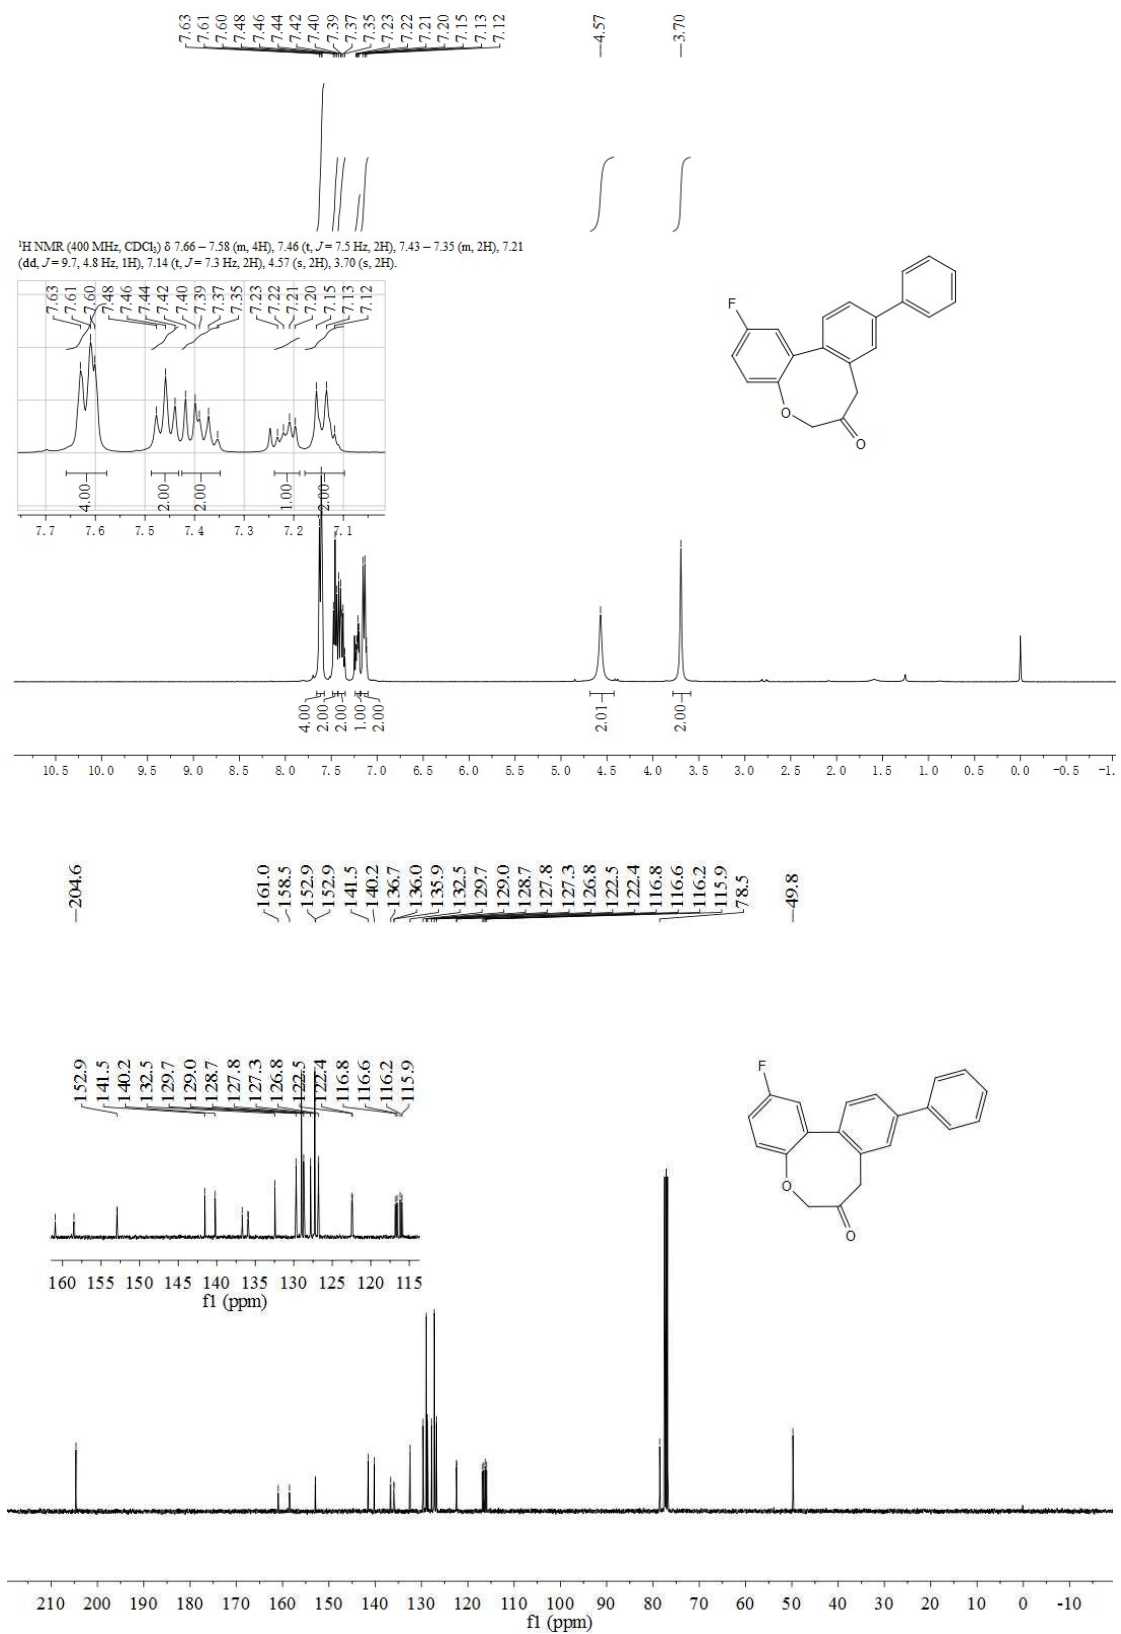

Fig. S100 NMR spectra of 7s

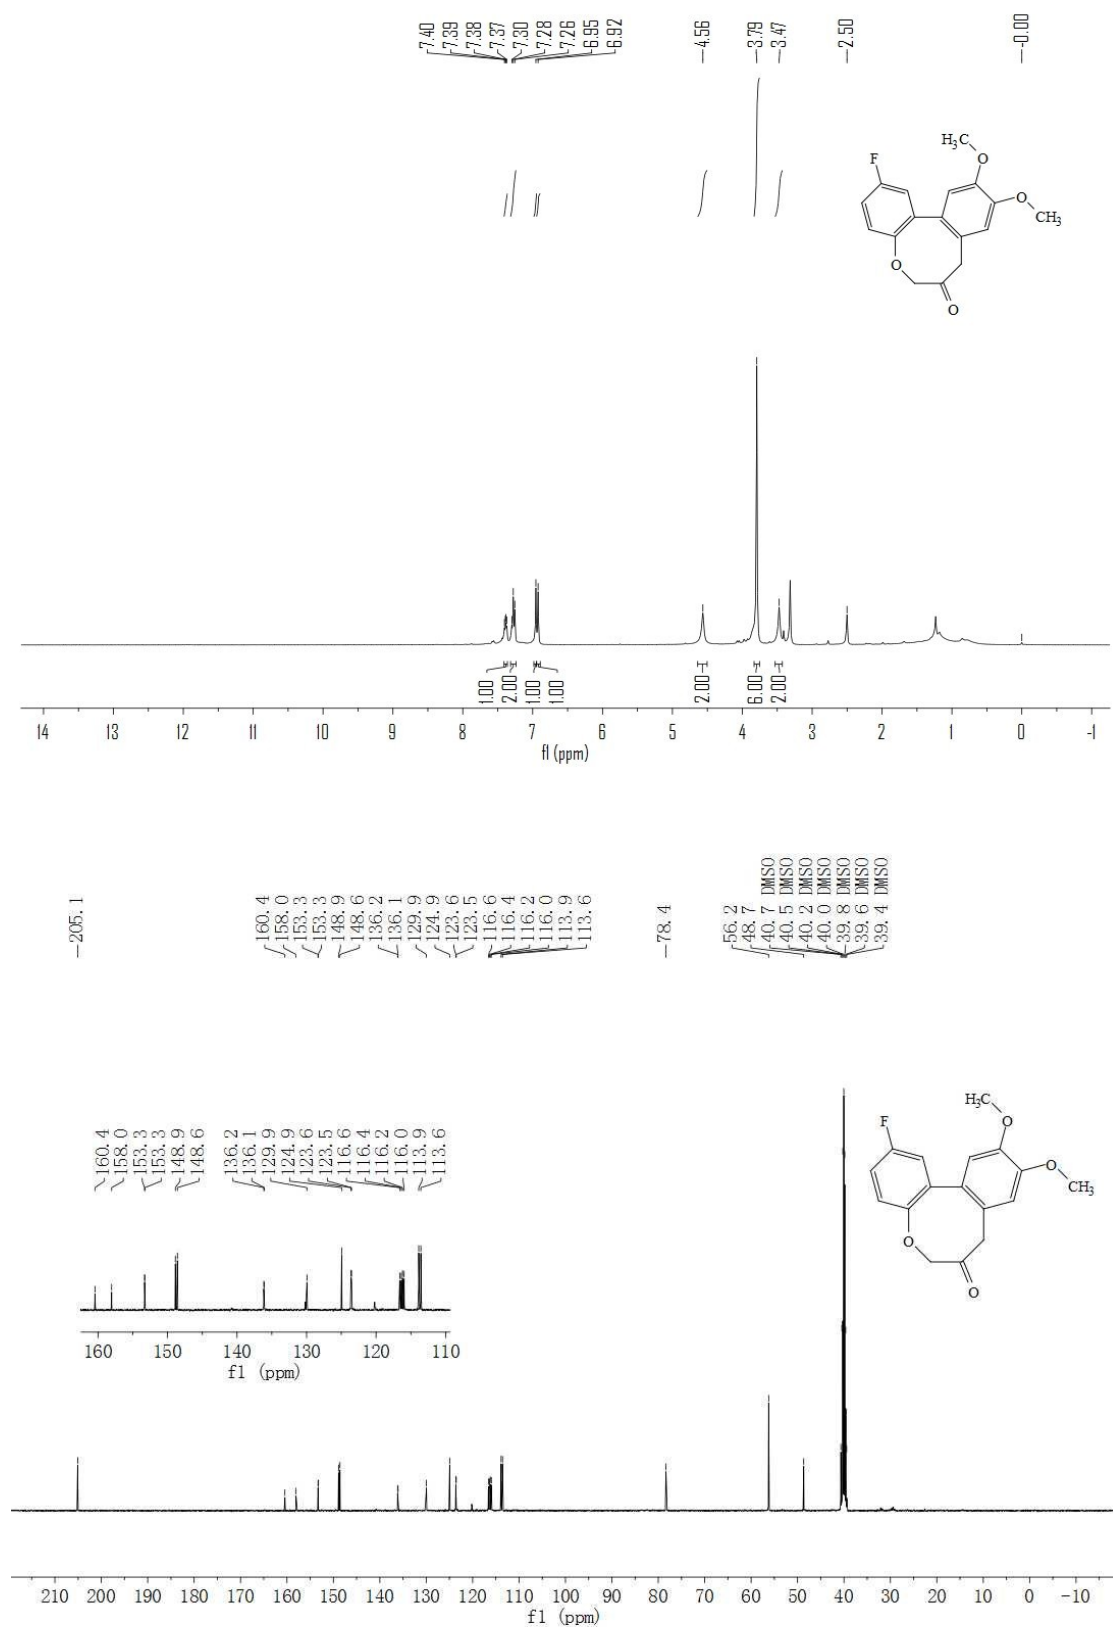

Fig. S101 NMR spectra of 7t

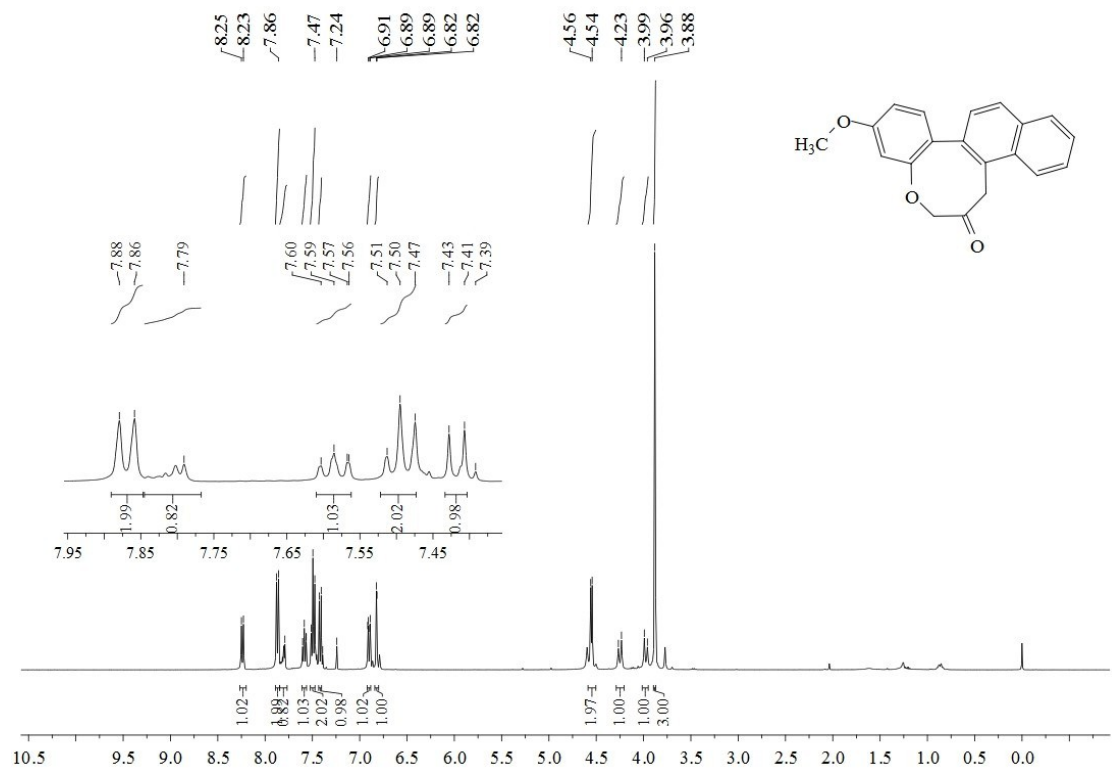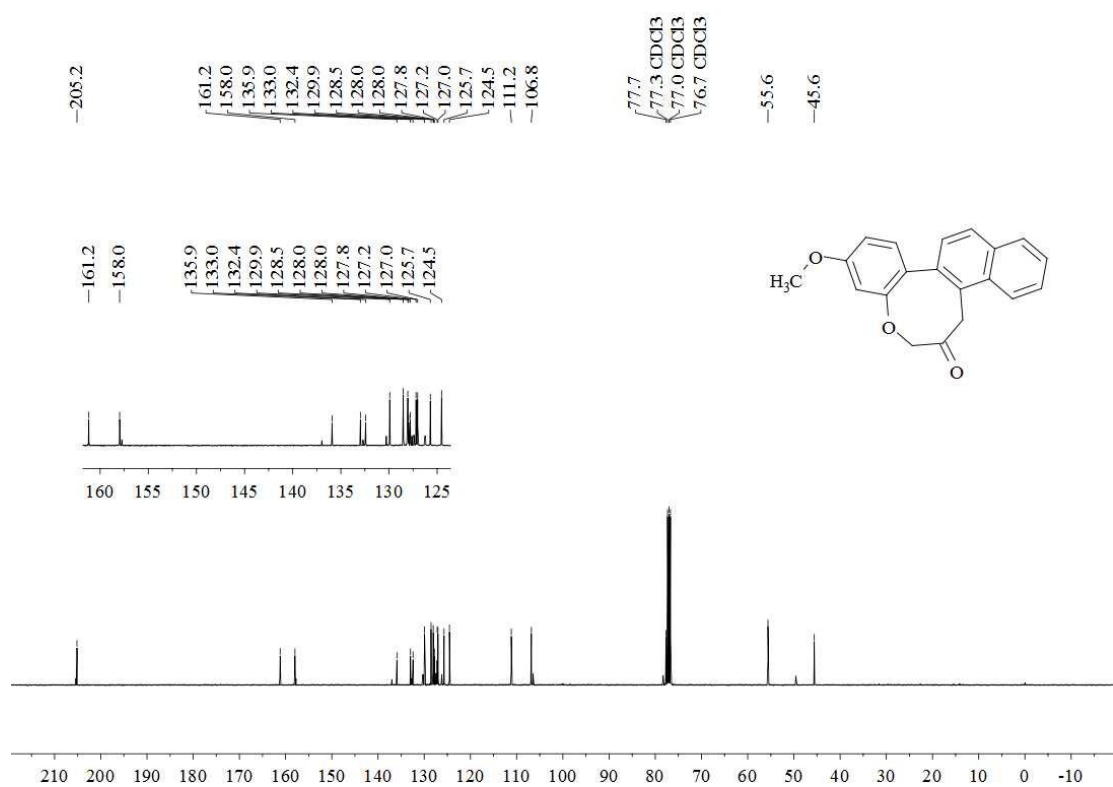

Fig. S102 NMR spectra of 7u

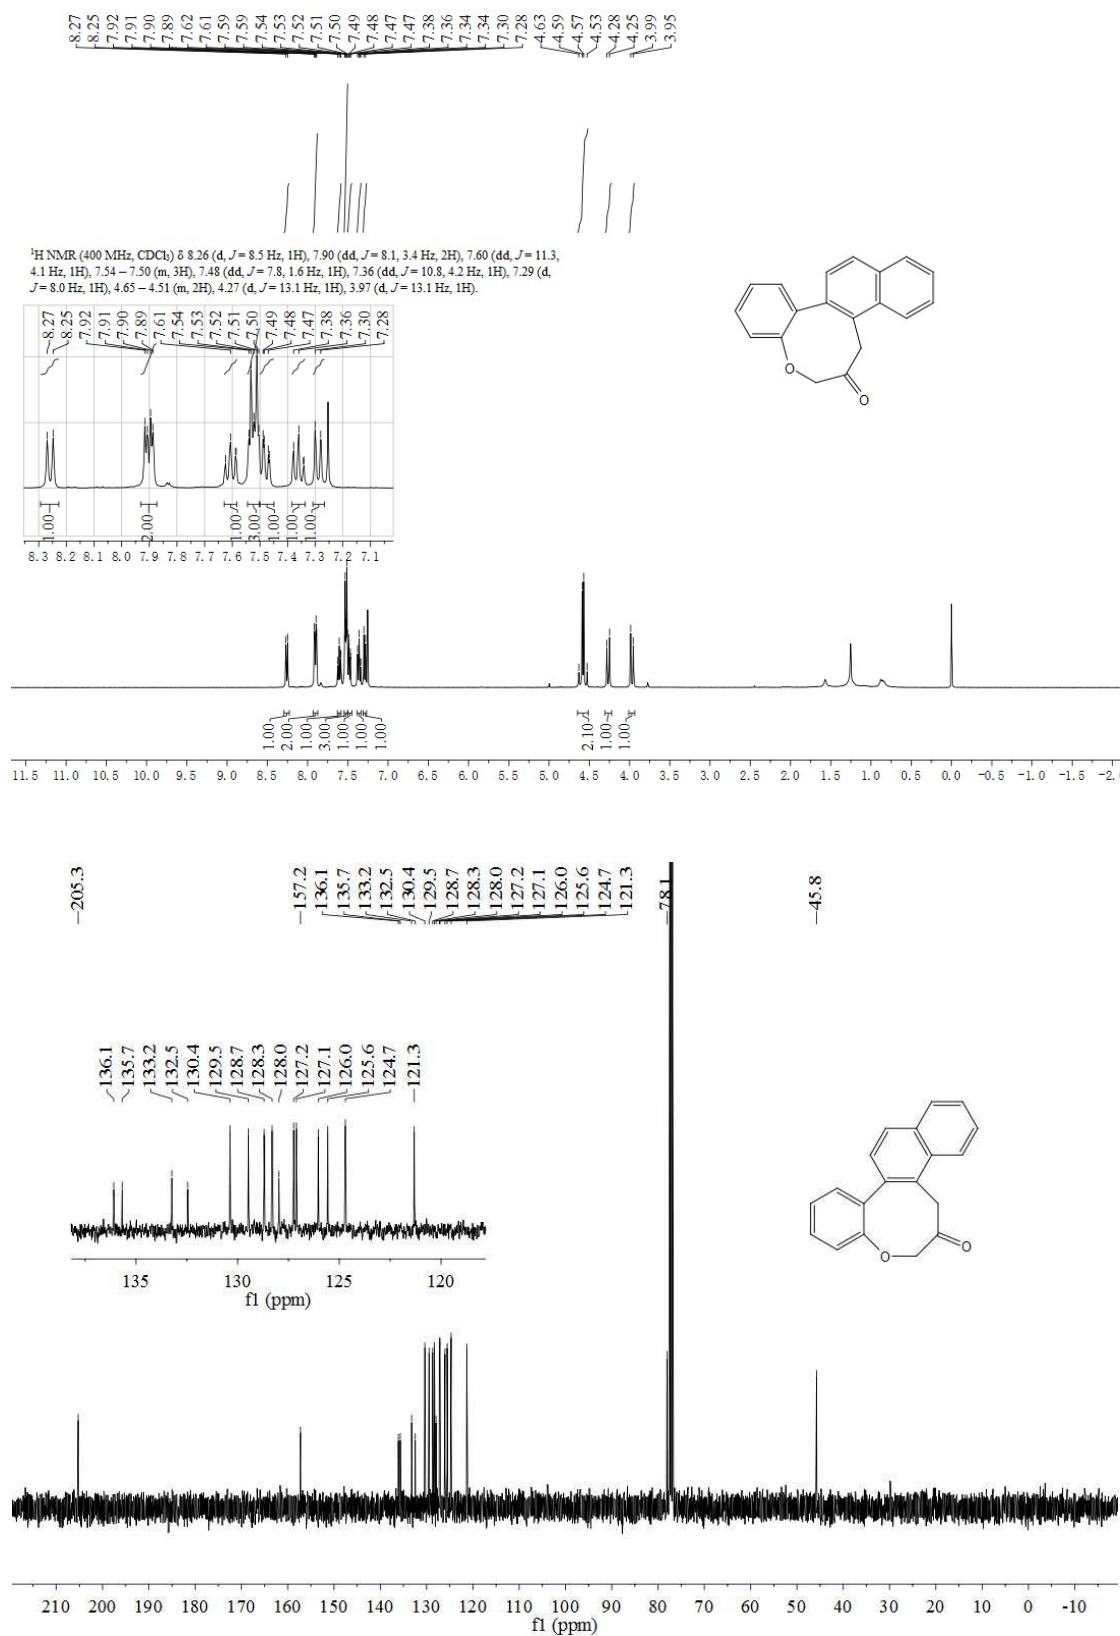

Fig. S103 NMR spectra of **7v**

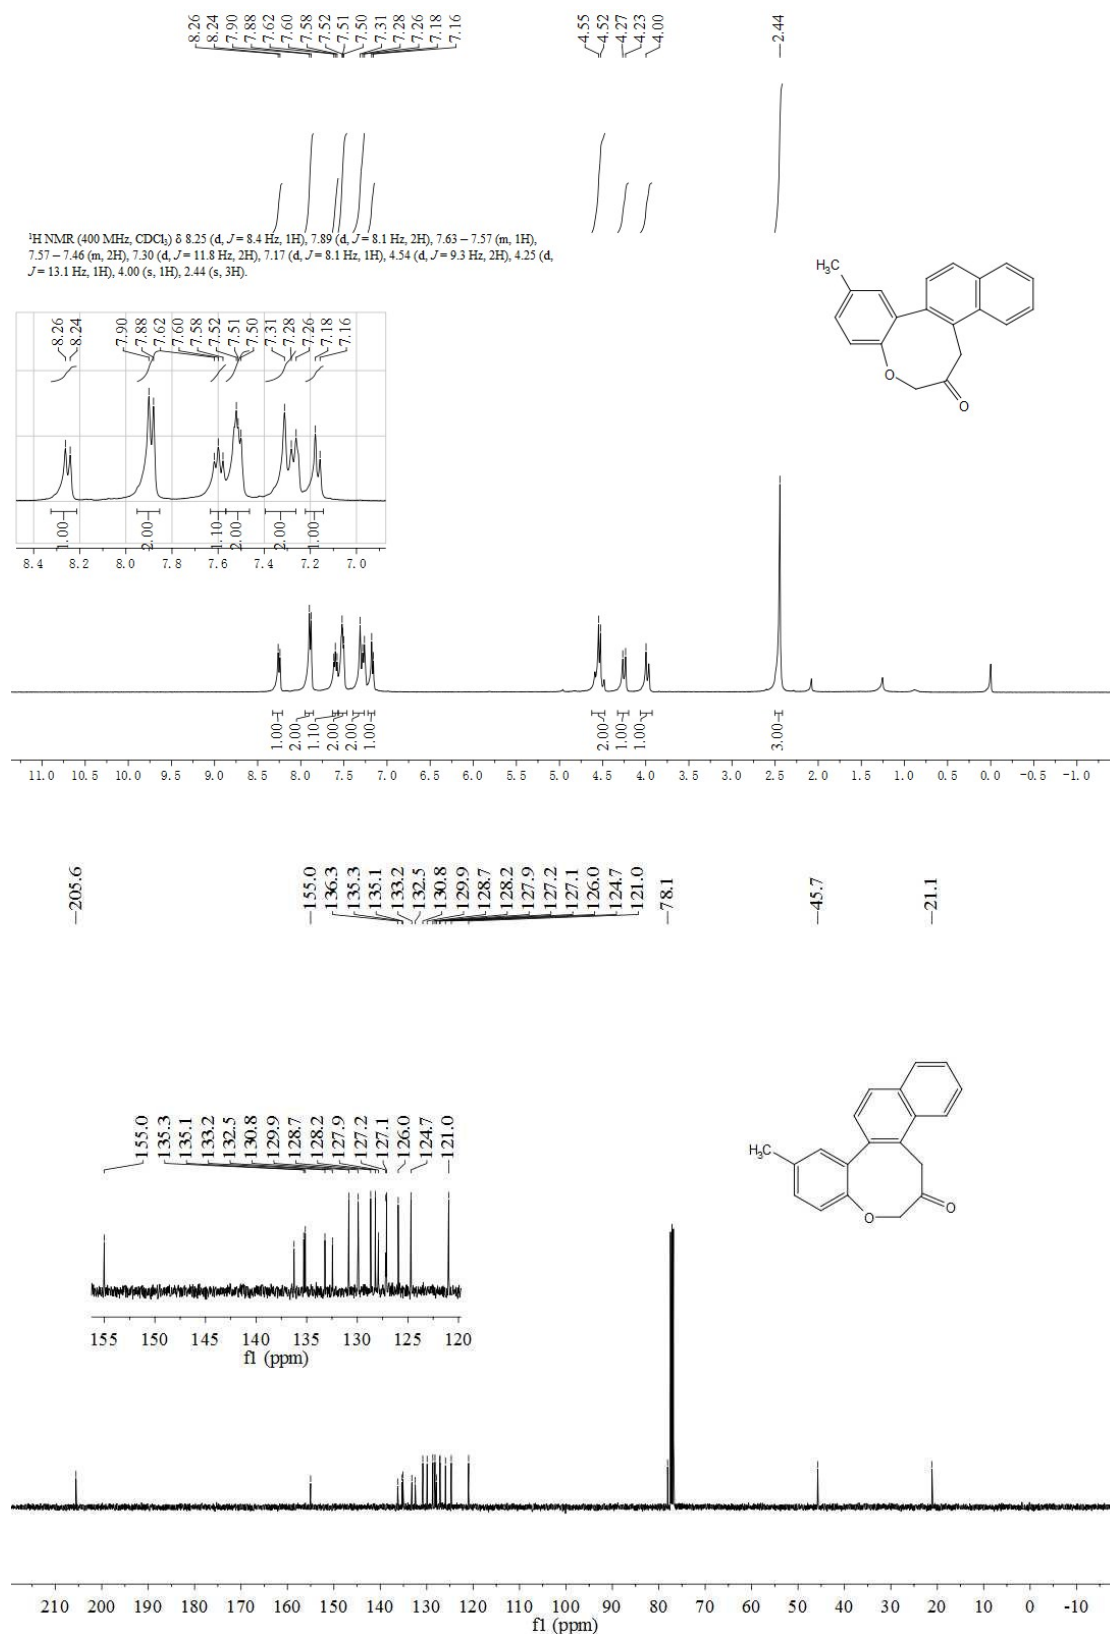

Fig. S104 NMR spectra of 7w

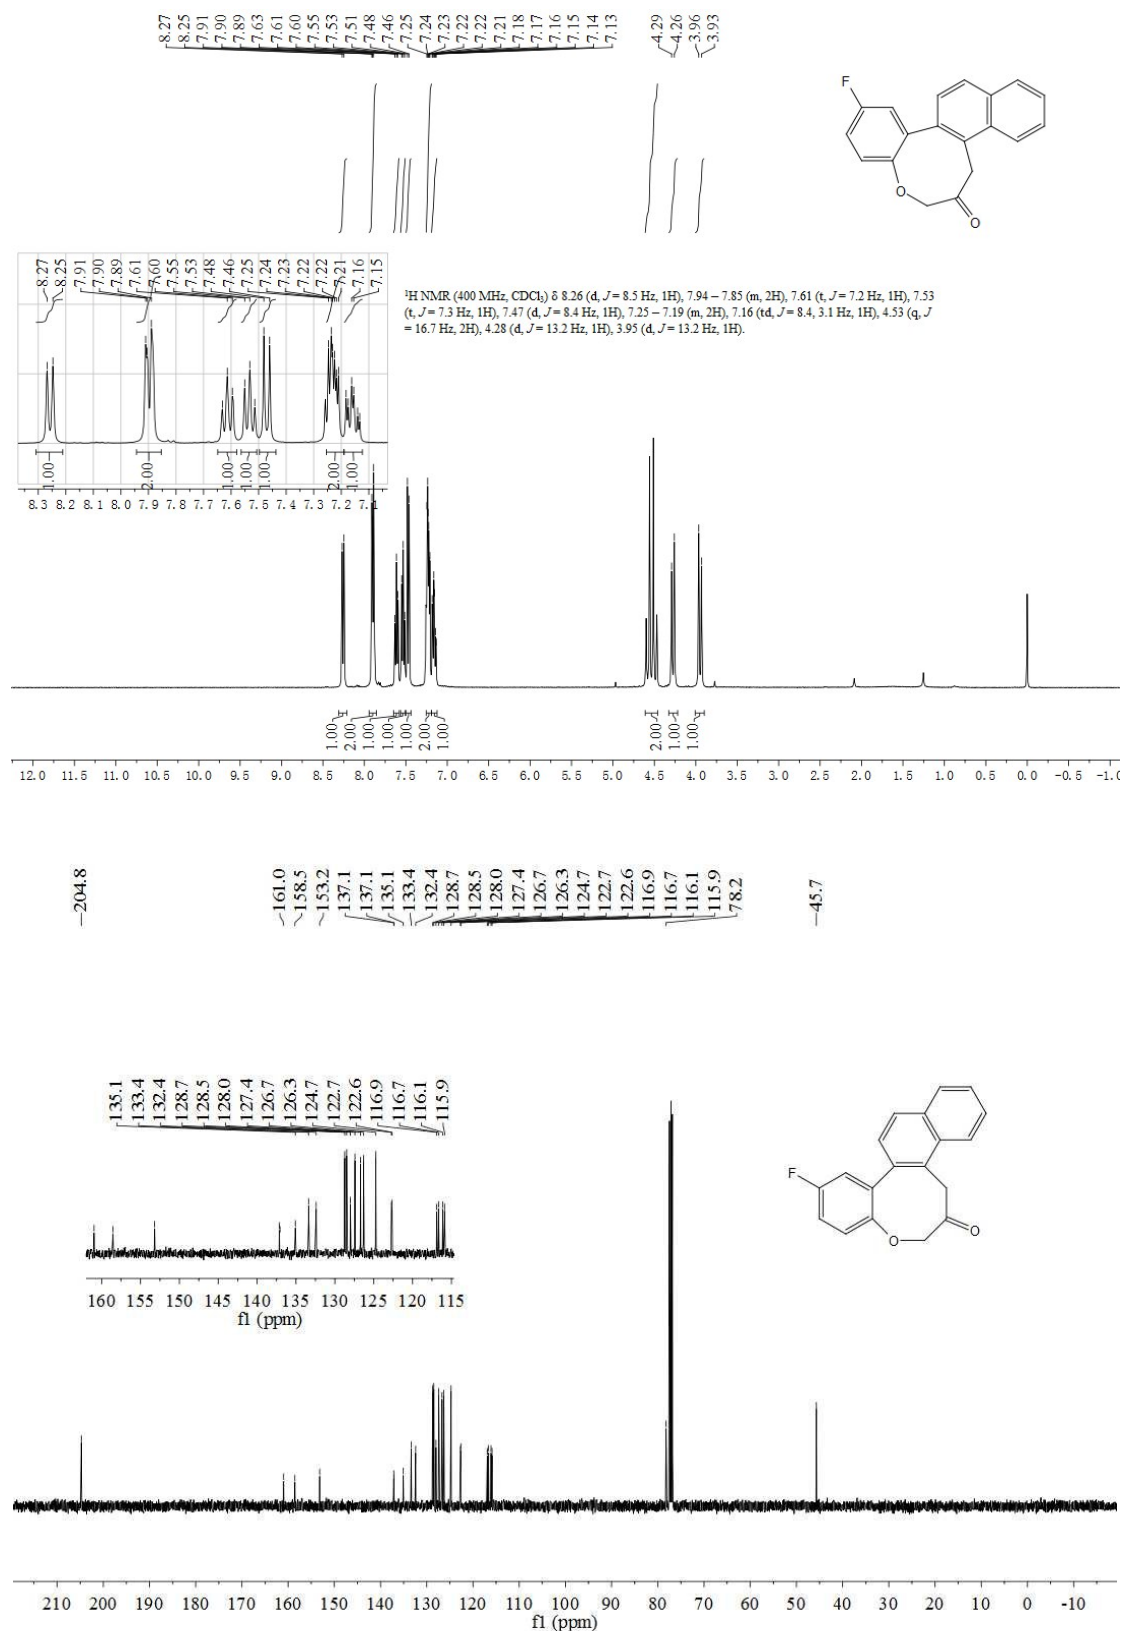

Fig. S105 NMR spectra of **7x**

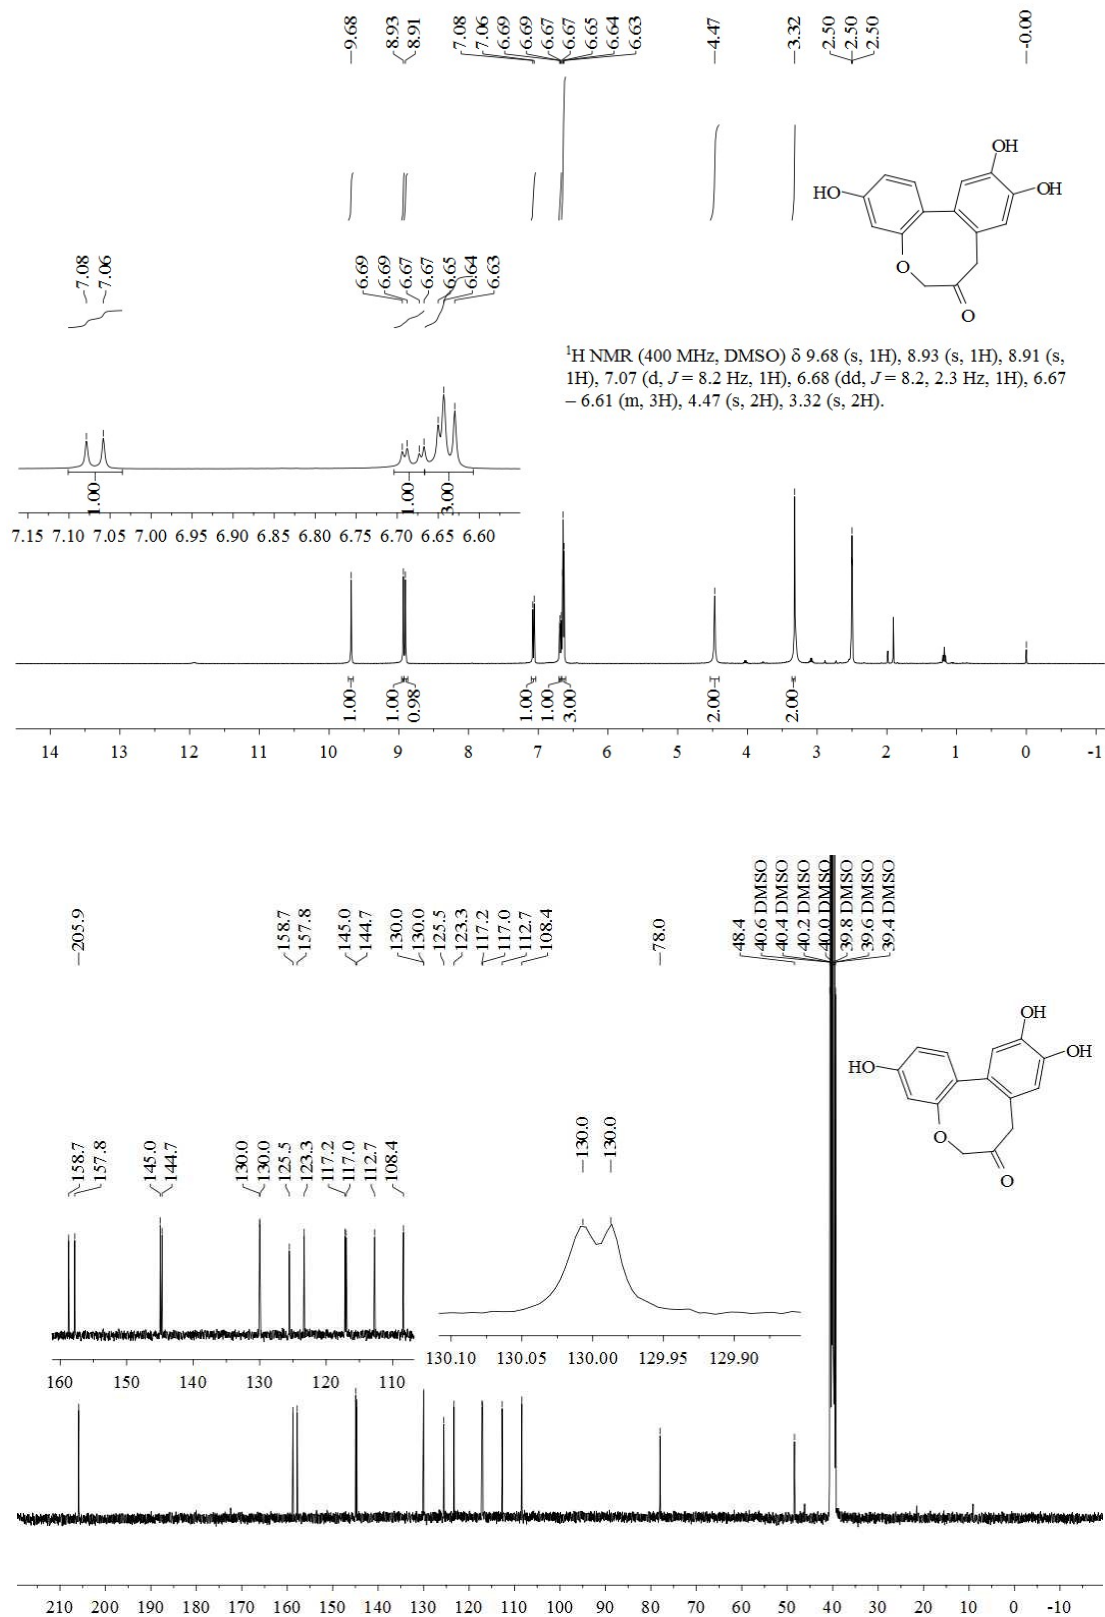

Fig. S106 NMR spectra of **Protosappanin A**
